# Supplementary material for: Validity of shoe-type inertial measurement units for Parkinson’s disease patients during treadmill walking
Source: Springer Nature journal article supplement (doi:10.1186/s12984-018-0384-9), 2018-05-15
Supplement: MOESM1 [file 15765462]

## 결과통지서

2016년 9월 13일에 접수된 심의의견에 대한 답변서에 대하여 기관생명윤리위원회에서 심의하여 다음과 같이 결정하였음을 통지합니다.

|              |                                       |             |           |                   |    |       |
|--------------|---------------------------------------|-------------|-----------|-------------------|----|-------|
| <b>과제번호</b>  | 2-104709-AB-N-01-201606-<br>HR-025-04 | <b>관리번호</b> | HR-025-04 |                   |    |       |
| <b>연구과제명</b> | 파킨슨병 환자의 보행로와 트레드밀 보행에 따른 보행특성        |             |           |                   |    |       |
| <b>연구책임자</b> | 성명                                    | 이 명 곤       | 소속        | 대학원 건강과학과<br>운동역학 | 직위 | 박사과정생 |

|              |                                                                                                                                                                                                          |                |                 |
|--------------|----------------------------------------------------------------------------------------------------------------------------------------------------------------------------------------------------------|----------------|-----------------|
| <b>심의대상</b>  | <input type="checkbox"/> 연구계획서(신규) <input checked="" type="checkbox"/> 연구계획서(시정/보완)                                                                                                                      |                |                 |
| <b>심의일자</b>  | 2016년 9월 19일                                                                                                                                                                                             | <b>심의장소</b>    | 동아대학교 기관생명윤리위원회 |
| <b>심의위원회</b> | 동아대학교 기관생명윤리위원회                                                                                                                                                                                          |                |                 |
| <b>심의종류</b>  | <input type="checkbox"/> 정규심의 <input checked="" type="checkbox"/> 신속심의                                                                                                                                   |                |                 |
| <b>심의결과</b>  | <input checked="" type="checkbox"/> 승인 <input type="checkbox"/> 시정승인 <input type="checkbox"/> 보완 후 신속심의<br><input type="checkbox"/> 보완 후 정규심의 <input type="checkbox"/> 반려 <input type="checkbox"/> 중지/보류 |                |                 |
| <b>승인일자</b>  | 2016.9.19.(월)                                                                                                                                                                                            | <b>승인 유효기간</b> | 2017년 9월 18일    |
| <b>승인번호</b>  | 2-104709-AB-N-01-201606-HR-025-04                                                                                                                                                                        |                |                 |

|             |     |
|-------------|-----|
| <b>심의의견</b> | 승인함 |
|-------------|-----|

|               |                                                                                                        |
|---------------|--------------------------------------------------------------------------------------------------------|
| <b>심의된 서류</b> | <ol style="list-style-type: none"> <li>1. 심의의견에 대한 답변서</li> <li>2. 변경대비표</li> <li>3. 수정된 서류</li> </ol> |
|---------------|--------------------------------------------------------------------------------------------------------|

본 통지서에 기재된 사항은 동아대학교 기관생명윤리위원회에 기록된 내용과 일치함을 증명합니다.  
 본 기관생명윤리위원회는 생명윤리 및 안전에 관한 법률과 관련 법규를 준수합니다.  
 본 연구와 이해상충(Conflict of Interest)이 있는 위원이 있을 경우 연구의 심의에서 배제하였습니다.  
 본 통지서의 사본은 기관생명윤리위원회에서 보관합니다.

※ 모든 연구자들은 아래의 사항을 준수하여야 합니다.

- 1) 승인된 계획서에 따라 연구를 수행하여야 합니다.
- 2) 위원회의 승인을 받은 동의서를 사용하여야 합니다.
- 3) 모국어가 한국어가 아닌 연구대상자들에게는 승인된 동의서를 연구대상자의 모국어로 인증된 번역본을 사용할 것이며 이러한 동의서 번역본은 반드시 위원회의 승인을 받아야 합니다.
- 4) 연구진행에 있어 연구대상자를 보호하기 위해 불가피한 경우를 제외하고 연구의 어떠한 변경이든 위원회의 사전 승인을 받고 수행하여야 하며 연구대상자들의 보호를 위해 취해진 어떠한 응급상황에서의 변경도 즉각 위원회에 보고하여야 합니다.
- 5) 위원회에서 승인된 계획서에 따라 등록된 어떠한 연구대상자라도 사망, 입원, 심각한 질병에 대하여는 위원회에 서면으로 보고하여야 합니다.
- 6) 연구 또는 연구대상자의 안전에 대해 유해한 영향을 미칠 수 있는 어떠한 새로운 정보도 즉각적으로 위원회에 보고하여야 합니다.
- 7) 위원회의 요구가 있을 때에는 연구의 진행과 관련된 보고를 위원회에 제출하여야 합니다.
- 8) 위원회가 심의한 과제에 대해 조사 및 감독 차원에서 현장점검을 실시할 시 원활한 점검절차 진행을 위해 연구자는 연구진행과 관련된 서류를 준비하고 협조하여야 합니다.
- 9) 연구대상자 모집광고를 사용할 시에는 사용 전에 위원회의 승인을 받아야 합니다.
- 10) 동의는 강제 혹은 부당한 영향이 없는 상태에서 충분한 설명에 근거하여 수행되어야 하며, 잠재적인 연구대상자에게 연구에 참여여부를 고려할 수 있도록 충분히 기회를 제공하여야 합니다.
- 11) 연구자와 그밖에 이해당사자는 연구계획서 승인을 광고나 홍보, 상업적 목적으로 사용할 수 없습니다.
- 12) 위원회의 심의결과 시정요구에 대해 모두 이행 및 충족될 경우에만 연구를 진행할 수 있습니다.
- 13) 위원회가 시정 및 보완을 요구한 경우 시정·보완 계획을 1개월 이내에 본 위원회에 제출하여야 합니다. 심의일로부터 1년 이내에 시정·보완 계획을 제출하지 않은 경우 심의가 무효화될 수 있습니다.
- 14) 시정계획은 신속심의로 진행되고 보완계획은 정규심의로 진행되며, 승인일과 승인 유효기간은 심의 결과에 따라 결정됩니다.
- 15) 승인기간 이후에도 연구를 지속하기 위해서는 적어도 승인 만료 2개월 전까지 연구의 진행 상황에 대하여 중간보고를 하여야 합니다.
- 16) 연구 종료 후 3개월 이내에 종료보고를 하여야 합니다.
- 17) 연구와 관련된 기록은 연구가 종료된 시점을 기준으로 최소 3년간 보관하여야 합니다.

2016년 9월 19일

동아대학교 기관생명윤리위원회위원장(인)

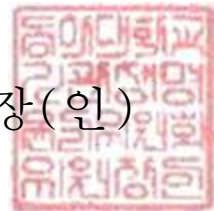

본 통지서에 기재된 사항은 동아대학교 기관생명윤리위원회에 기록된 내용과 일치함을 증명합니다.  
본 기관생명윤리위원회는 생명윤리 및 안전에 관한 법률과 관련 법규를 준수합니다.  
본 연구와 이해상충(Conflict of Interest)이 있는 위원이 있을 경우 연구의 심의에서 배제하였습니다.  
본 통지서의 사본은 기관생명윤리위원회에서 보관합니다.
