# Supplementary material for: Validity of shoe-type inertial measurement units for Parkinson’s disease patients during treadmill walking
Source: J Neuroeng Rehabil. 2018 May 15;15:38. doi: 10.1186/s12984-018-0384-9 (PMC5952468; doi:10.1186/s12984-018-0384-9)
Supplement: Supplementary file 2 — Raw data - resultant linear accelerations. (XLSX 9196 kb) [file 12984_2018_384_MOESM2_ESM.xlsx]

## Sheet: All participants
Resultant linear accelerations
Left shoe		Right shoe
Motion capture system	Shoe-type IMU	Motion capture system	Shoe-type IMU
1.00241	0.32562	9.82832	9.77093
0.43975	0.33373	8.60791	9.17267
0.15025	0.36198	7.29672	8.61788
0.13438	0.40026	6.127	8.09075
0.2478	0.43788	5.24311	7.62211
0.26949	0.46516	4.74826	7.30093
0.25895	0.47893	5.04127	7.40947
0.23324	0.48348	6.5066	8.4609
0.23324	0.48431	9.32845	10.6619
0.27869	0.48391	12.6375	13.5082
0.21494	0.48406	15.0907	16.1818
0.11622	0.49394	16.04	17.9345
0.2045	0.53421	17.2117	18.1802
0.16447	0.60782	19.2333	17.0351
0.38333	0.64415	19.4946	15.703
0.94252	0.55046	17.9915	14.6068
2.12777	0.82178	15.3034	12.643
4.4332	2.12944	11.9325	9.56328
7.27122	4.17112	8.54506	6.30903
9.80613	6.52426	5.46055	3.66747
12.0619	8.71389	3.16891	1.84614
14.1033	10.5072	1.55429	0.8491
15.5382	11.9044	0.72393	0.70683
16.4451	12.9372	1.1875	0.90318
17.1304	13.6537	1.51016	0.98631
17.3922	14.1156	1.6108	0.92977
16.9585	14.3265	1.41359	0.84752
15.8545	14.1967	1.04975	0.85176
14.1588	13.5053	0.95732	0.90855
12.2312	11.9832	0.75871	0.91433
10.1012	9.54847	0.40932	0.83273
7.48337	6.43187	0.13991	0.69147
6.20148	3.20116	0.27922	0.55057
8.03514	2.14429	0.44238	0.4672
10.1445	4.7286	0.4165	0.45294
10.895	7.22469	0.44477	0.47997
10.3903	8.56242	0.35016	0.51766
9.35216	8.67607	0.2928	0.54927
8.46976	8.1832	0.33635	0.57269
7.93938	7.68077	0.50074	0.59245
7.77353	7.4242	0.4993	0.61142
7.88308	7.4812	0.21878	0.62462
8.02238	7.85766	0.28558	0.62933
8.17364	8.46909	0.3438	0.63939
8.444	9.13071	0.37751	0.6729
8.91186	9.68506	0.3315	0.7271
9.53371	10.1002	0.17055	0.77844
10.228	10.4306	0.22075	0.8082
10.7805	10.7243	0.32297	0.81612
11.0091	10.9776	0.28621	0.81098
11.1195	11.1618	0.1939	0.79861
11.2449	11.2606	0.0584	0.77917
11.3558	11.2799	0.14093	0.75202
11.449	11.2409	0.17746	0.72152
11.3988	11.164	0.148	0.6952
11.1005	11.0541	0.08291	0.678
10.6737	10.8959	0.09644	0.67164
10.2006	10.6662	0.11628	0.67612
9.66079	10.3574	0.06622	0.68844
9.00814	9.96087	0.0988	0.70234
8.13439	9.44793	0.22004	0.71304
7.1244	8.81483	0.29311	0.72105
6.03727	8.11713	0.26512	0.72906
4.91826	7.44582	0.49143	0.73723
4.1439	6.91942	0.27333	0.74199
4.29243	6.8058	0.11585	0.73741
5.39386	7.56464	0.06975	0.71713
7.73397	9.34041	0.13375	0.67946
11.0567	11.7049	0.21575	0.63636
13.5446	14.1302	0.26267	0.61302
13.9216	16.1784	0.37339	0.6252
15.1061	17.181	0.81089	0.66144
19.2065	16.3422	1.80536	0.80935
21.6432	13.9854	3.6611	1.51555
21.0448	12.2094	6.20638	3.11265
18.4805	11.8493	9.12138	5.52527
15.0448	11.1453	12.246	8.36556
11.3451	9.242	15.204	11.1467
7.84599	6.52057	17.6877	13.6188
4.96139	3.71227	19.5916	15.6939
2.75933	1.57189	20.6992	17.2123
1.03214	0.81964	20.7991	17.9946
0.99399	1.15082	19.9215	17.905
1.85006	1.4031	18.295	16.825
2.0786	1.49083	16.0715	14.7189
1.89643	1.39309	13.5118	11.7425
1.54019	1.11789	10.8661	8.32902
1.068	0.76766	9.26543	5.40444
0.66375	0.4684	11.0498	5.40132
0.40101	0.34822	14.393	8.44483
0.23635	0.3775	16.7511	11.4847
0.11563	0.39117	17.3941	13.2208
0.23569	0.37382	16.6688	13.4895
0.27958	0.37353	15.2809	12.5287
0.29219	0.40533	13.8281	10.8942
0.26197	0.44214	12.6276	9.38599
0.19765	0.46088	11.6567	8.60755
0.18943	0.47187	10.8664	8.64403
0.32867	0.50012	10.3175	9.10249
0.41358	0.54702	10.0048	9.54646
0.33389	0.58518	9.87306	9.80097
0.22888	0.59517	9.92405	9.90782
0.23201	0.58737	10.0011	9.99385
0.12814	0.58409	9.96834	10.1299
0.08542	0.59191	9.93953	10.2768
0.18904	0.59842	9.96095	10.3542
0.36718	0.59093	9.94544	10.316
0.38043	0.56902	9.75059	10.1637
0.26502	0.5395	9.25949	9.90166
0.52581	0.50683	8.52978	9.51377
0.36371	0.47183	7.72778	9.00609
0.32302	0.43536	6.82294	8.43169
0.30198	0.40049	5.81582	7.84734
0.11498	0.37188	4.85579	7.25826
0.23988	0.35384	4.00361	6.66727
0.28976	0.3506	3.5332	6.22197
0.2773	0.36476	4.05653	6.22476
0.18788	0.3925	5.29794	6.95442
0.13778	0.42443	7.41946	8.61287
0.10935	0.45229	10.7585	11.3604
0.10986	0.4726	14.4005	15.0394
0.1296	0.49064	16.9173	18.8961
0.16849	0.52146	18.2337	21.6991
0.28725	0.56305	19.069	22.2515
0.78934	0.57747	18.863	20.2748
2.10383	0.657	17.2259	16.7689
4.18675	1.34335	14.5845	12.9349
6.45209	2.86779	11.6396	9.33115
8.45484	4.94978	8.66575	6.29005
10.1044	7.09279	5.89175	3.95528
11.5718	8.86821	3.48119	2.27143
13.0737	10.1421	1.6498	1.20947
14.5551	11.0865	0.66438	0.73026
15.9033	11.9914	0.89494	0.78728
16.9959	13.0029	1.42921	1.00021
17.6714	14.0259	1.61866	1.07689
17.831	14.8445	1.44358	0.99166
17.3159	15.2831	1.08659	0.83766
15.9266	15.1856	0.85472	0.75055
14.033	14.2627	0.77318	0.75798
12.0448	12.1842	0.64864	0.76113
9.42416	8.91996	0.50285	0.70899
7.32687	5.01189	0.29922	0.61944
8.9054	2.74781	0.24247	0.54241
11.5769	5.24875	0.61835	0.516
12.9353	8.29051	0.70047	0.53102
13.0379	10.3258	0.57425	0.5591
12.3778	10.8529	0.47627	0.58449
11.4079	10.1264	0.53182	0.60278
10.5225	9.05212	0.48688	0.61104
9.95463	8.36281	0.482	0.61411
9.68448	8.24539	0.33881	0.62946
9.61371	8.55116	0.09956	0.66658
9.72251	9.03545	0.20141	0.71865
9.83325	9.51174	0.33254	0.77947
9.99432	9.9205	0.35265	0.84616
10.4047	10.2886	0.3966	0.90658
11.0116	10.6534	0.3983	0.94142
11.6426	11.033	0.42225	0.94342
11.9954	11.4017	0.37125	0.92149
12.0518	11.6884	0.26981	0.88644
11.9446	11.8289	0.21097	0.844
11.7218	11.7955	0.21779	0.79845
11.4594	11.5902	0.11357	0.75629
11.1933	11.247	0.13535	0.72475
10.7487	10.8216	0.22628	0.70749
10.0141	10.3652	0.14097	0.70488
9.05652	9.89039	0.24478	0.71607
7.89895	9.37079	0.39658	0.73638
6.76345	8.79295	0.25827	0.75422
5.75324	8.16236	0.03919	0.75783
4.9255	7.51532	0.06302	0.74762
4.581	7.05435	0.14322	0.73571
5.24604	7.17465	0.22745	0.7324
6.96432	8.1651	0.20258	0.73847
9.79748	10.0339	0.03767	0.74903
13.3772	12.6682	0.17236	0.76108
15.9624	15.7029	0.1769	0.77795
16.7492	18.3489	0.41819	0.80652
17.825	19.6123	1.00641	0.8536
20.3575	18.7757	1.66951	0.97273
21.1333	16.2753	2.62587	1.39062
19.585	13.8723	4.28014	2.37309
16.6808	12.216	6.462	3.91354
13.1733	10.2007	8.77677	5.76704
9.70962	7.58177	11.0825	7.65112
6.63189	4.96037	13.0423	9.45453
4.08753	2.92067	14.6019	11.16
2.24863	1.81891	16.0828	12.6764
1.03009	1.35896	17.2988	13.8786
0.72072	1.06511	17.8977	14.6803
1.44086	1.06617	17.8449	15.0117
2.08144	1.33939	17.1224	14.7605
2.09961	1.50954	15.6986	13.8047
1.67996	1.40249	13.7202	12.1474
1.1215	1.06214	11.4926	9.88552
0.61774	0.63671	9.4502	7.24944
0.41818	0.31448	9.6445	5.33262
0.26638	0.28891	13.0833	6.21616
0.16427	0.36437	16.6183	9.24088
0.24857	0.39537	18.4899	12.3629
0.41057	0.40631	18.4117	14.2269
0.4632	0.4201	16.9207	14.3642
0.3852	0.43381	14.9281	13.1048
0.25082	0.43671	13.0288	11.0436
0.21697	0.42738	11.4392	9.00866
0.26402	0.41412	10.2339	7.89334
0.43738	0.41111	9.42035	7.84083
0.45342	0.42857	8.9435	8.21741
0.24625	0.45857	8.79741	8.54984
0.15285	0.49062	8.88209	8.81733
0.20167	0.52957	9.03794	9.13084
0.27042	0.58102	9.21575	9.4765
0.34821	0.63142	9.42024	9.74546
0.34822	0.65583	9.61889	9.85258
0.32467	0.64421	9.66079	9.77024
0.34746	0.60601	9.36722	9.5141
0.3631	0.55299	8.69522	9.14655
0.21301	0.49249	7.82644	8.74237
0.06635	0.43113	6.96977	8.34429
0.03184	0.3751	6.18162	7.97672
0.18561	0.32871	5.44438	7.64056
0.14229	0.29647	4.65306	7.32789
0.13712	0.28601	4.15449	7.11437
0.22853	0.30299	4.51338	7.17366
0.19791	0.34412	5.63519	7.67731
0.18135	0.39714	7.26337	8.75385
0.10407	0.44559	9.33244	10.5276
0.16011	0.47709	11.7773	12.9749
0.15835	0.48943	13.9571	15.6732
0.17721	0.49325	15.093	17.7929
0.13587	0.50993	15.5042	18.477
0.17099	0.55124	16.3273	17.5358
0.26861	0.58221	16.361	15.6893
0.56572	0.52318	15.0793	13.7082
1.42705	0.43121	12.954	11.727
3.37466	0.92969	10.4304	9.51866
6.20555	2.17821	7.79146	6.90506
8.87058	4.12488	5.22389	4.19894
11.0499	6.57585	2.99765	2.10391
13.0549	9.0731	1.4705	1.0807
14.8922	11.1886	0.64146	0.86739
16.4499	12.7607	0.71855	0.83694
17.6102	13.8887	1.00561	0.82571
18.2163	14.7392	1.35268	0.80388
18.1371	15.3467	1.55415	0.7456
17.2296	15.5442	1.26078	0.70625
15.4337	14.9602	0.8567	0.75197
13.0203	13.1966	0.67984	0.83795
10.1512	10.1653	0.50175	0.87673
7.21524	6.29491	0.26706	0.83143
6.9062	2.95608	0.13199	0.72619
9.11192	3.90848	0.39314	0.61435
10.7391	6.83171	0.48893	0.53326
11.1296	9.16348	0.48752	0.47949
10.8008	10.2405	0.42633	0.43625
10.2245	9.95653	0.31344	0.40918
9.62116	8.91043	0.32297	0.407
9.14519	7.93351	0.40389	0.42524
8.90985	7.47788	0.39861	0.46282
8.95697	7.57619	0.30894	0.51411
9.163	8.09271	0.11076	0.56771
9.47077	8.84185	0.19064	0.62016
9.91193	9.62565	0.30646	0.67247
10.4653	10.3036	0.32017	0.71806
11.0878	10.8346	0.27468	0.74449
11.6643	11.2499	0.14974	0.74805
12.1512	11.5797	0.20387	0.73684
12.4394	11.8123	0.23451	0.71967
12.4462	11.9288	0.18367	0.70059
12.3225	11.9291	0.20257	0.68158
12.1391	11.8188	0.12389	0.66564
11.8268	11.602	0.01704	0.65633
11.337	11.2648	0.09493	0.6551
10.5968	10.7673	0.12294	0.65994
9.66996	10.0905	0.18476	0.66639
8.59047	9.2814	0.39238	0.67029
7.20628	8.4326	0.31752	0.66985
5.74798	7.60635	0.10046	0.66552
4.57357	6.82564	0.16837	0.65957
3.64311	6.21976	0.10971	0.65575
3.43713	6.08665	0.08487	0.65836
4.49579	6.67013	0.11781	0.67086
6.62546	8.00417	0.03924	0.69247
9.9052	10.0443	0.12411	0.71623
13.4975	12.6004	0.06737	0.73435
15.9856	15.2372	0.35128	0.75061
17.7671	17.3839	0.89561	0.81194
19.8798	18.4075	1.64488	1.06675
20.8482	18.172	2.85689	1.68829
19.6158	17.4655	4.75318	2.7709
16.8931	16.4408	7.06307	4.36051
13.7368	14.122	9.5103	6.3243
10.4464	10.4216	12.019	8.39507
7.32672	6.44912	14.2996	10.4218
4.65684	3.33521	16.2019	12.3306
2.43459	1.61623	17.607	13.9639
1.09749	1.10379	18.4017	15.1489
1.08409	1.04878	18.5738	15.7778
1.63303	1.1976	18.0341	15.7797
1.9001	1.42456	16.7917	15.0767
1.88153	1.51487	14.981	13.6084
1.64869	1.37344	12.8695	11.4123
1.19245	1.05696	10.6982	8.58204
0.7976	0.68744	9.44563	5.63947
0.54324	0.37377	11.1685	5.55709
0.32683	0.25728	14.6853	9.3228
0.15325	0.3297	17.4026	13.2518
0.28532	0.38858	18.3545	15.465
0.41007	0.41144	17.7346	15.4976
0.37386	0.42378	16.2724	13.9787
0.33362	0.43374	14.6111	11.891
0.23655	0.43572	13.066	9.93293
0.16575	0.43032	11.8201	8.6094
0.24597	0.43145	10.9388	8.21648
0.32344	0.45493	10.3453	8.47909
0.2248	0.50168	10.0282	8.8588
0.18491	0.55376	9.9645	9.08908
0.32833	0.59761	9.96522	9.22155
0.38257	0.63667	9.99278	9.36993
0.32519	0.67549	10.0421	9.52368
0.20208	0.70376	10.0602	9.57745
0.21917	0.69992	9.99442	9.44095
0.31294	0.65056	9.69221	9.09691
0.2183	0.56554	9.12051	8.59436
0.25395	0.47123	8.31488	8.02137
0.1573	0.39207	7.30039	7.44921
0.11304	0.34057	6.05385	6.89822
0.28305	0.31822	4.85879	6.37803
0.34576	0.32116	3.92651	5.89696
0.30441	0.34352	3.08782	5.50953
0.16803	0.37776	3.32825	5.50974
0.18362	0.41698	5.17439	6.37937
0.25015	0.45587	7.98499	8.29858
0.13954	0.48668	11.527	11.1837
0.13868	0.50133	15.6024	15.0016
0.18158	0.50711	19.2243	19.4338
0.07689	0.53292	21.0953	23.5389
0.34252	0.58485	21.1728	25.9656
0.62676	0.59486	19.8557	25.478
1.48409	0.56784	17.0673	21.8168
3.14897	1.10747	13.7673	16.2886
5.13464	2.47871	10.8058	10.8541
7.00217	4.36642	8.20857	6.69105
8.64559	6.33038	6.0306	4.03853
10.1233	7.94275	3.91962	2.52604
11.5913	9.11092	1.82313	1.58179
13.2083	10.1052	0.85411	0.94159
15.0098	11.2399	1.15589	0.65523
16.8704	12.6056	1.61322	0.77511
18.4375	14.1043	1.71743	0.93796
19.3351	15.592	1.48568	0.95476
19.2715	16.7886	1.32249	0.86938
17.9783	17.1836	1.0994	0.78235
15.7888	16.2942	0.75903	0.75009
13.2526	13.9645	0.53949	0.73279
10.0051	10.4248	0.4484	0.67806
6.57786	6.23615	0.30493	0.59622
6.57541	2.25967	0.19259	0.52285
9.07132	3.16524	0.40704	0.48221
10.6763	6.6237	0.55215	0.4806
11.0375	9.01383	0.6182	0.51084
10.7022	9.94114	0.62009	0.55475
10.2006	9.78431	0.44668	0.59268
9.9355	9.15574	0.48171	0.61687
10.046	8.59751	0.51171	0.63081
10.3742	8.47659	0.36353	0.64695
10.7334	8.88657	0.23649	0.67937
11.0181	9.65656	0.22102	0.72653
11.2298	10.4856	0.22433	0.77408
11.4419	11.1431	0.31737	0.81247
11.5781	11.5537	0.41394	0.83982
11.7175	11.7512	0.37273	0.85413
11.9764	11.8121	0.31691	0.85197
12.2045	11.8013	0.26874	0.83613
12.3491	11.7579	0.19116	0.81619
12.3569	11.7022	0.14385	0.79911
12.2258	11.635	0.13769	0.78497
12.1494	11.5436	0.13438	0.77114
12.0278	11.416	0.16336	0.75694
11.5966	11.2455	0.15181	0.74436
11.0528	11.0115	0.0734	0.73573
10.5792	10.6709	0.10346	0.73217
9.80335	10.1795	0.15505	0.73291
8.64014	9.48389	0.29015	0.73593
7.23425	8.53307	0.29492	0.73968
5.49712	7.40367	0.14427	0.74424
3.69505	6.37976	0.18587	0.75211
2.87184	5.82003	0.24866	0.76708
3.60113	5.92295	0.15905	0.78932
5.24071	6.77873	0.13173	0.81066
7.20355	8.51207	0.12885	0.81823
10.0551	11.0714	0.15995	0.80589
14.0095	14.0844	0.15565	0.77989
16.8213	16.9841	0.26263	0.75567
17.474	19.0703	0.47543	0.7584
18.3736	19.4831	0.83161	0.84717
20.528	17.9927	1.65821	1.13994
20.8808	16.0047	3.12936	1.78091
18.8881	14.7617	5.06056	2.87951
15.7521	13.3889	7.26291	4.39438
12.2944	11.1134	9.62332	6.185
8.84883	8.27864	11.8838	8.17077
5.83845	5.41049	13.9498	10.2349
3.55669	2.95258	15.7335	12.123
1.97063	1.38575	17.0934	13.6061
0.87261	0.96834	17.9625	14.6114
1.00249	1.04265	18.1928	15.1656
1.24679	1.1406	17.7169	15.2594
1.44919	1.22818	16.6695	14.7957
2.08666	1.20837	15.1206	13.6565
2.13957	1.02846	13.1175	11.6753
1.40401	0.75244	10.9671	8.71621
0.79694	0.47857	9.52991	5.54139
0.6191	0.31413	10.8196	5.87265
0.42752	0.31096	14.2898	9.75125
0.1484	0.34934	17.3466	13.2689
0.36812	0.37477	18.6453	15.2547
0.44639	0.40261	18.0998	15.7568
0.44025	0.43506	16.4843	14.9452
0.25542	0.45344	14.5687	12.9877
0.19723	0.44681	12.7333	10.5137
0.26662	0.43229	11.1982	8.5473
0.43397	0.44503	10.0656	7.75054
0.37609	0.49833	9.34344	7.84001
0.19218	0.56236	9.08733	8.19947
0.24873	0.60815	9.12025	8.58415
0.28606	0.63789	9.1799	8.98861
0.35312	0.66551	9.31054	9.39651
0.43127	0.68956	9.51655	9.73475
0.25251	0.69206	9.71444	9.93771
0.20205	0.66118	9.92053	9.98442
0.36238	0.60689	9.90862	9.87798
0.39148	0.54959	9.46573	9.63856
0.19991	0.501	8.73324	9.2863
0.13807	0.46314	7.85316	8.82965
0.08558	0.43627	6.88963	8.30146
0.17687	0.42042	5.80794	7.75685
0.16659	0.41446	4.7992	7.27107
0.11125	0.41835	4.11929	7.00879
0.14826	0.43425	4.04147	7.16273
0.10308	0.46097	5.04353	7.78819
0.24223	0.4885	6.7583	8.88882
0.20733	0.50305	8.98265	10.6082
0.15096	0.4994	11.8382	13.0774
0.21002	0.48676	14.3297	15.9991
0.29809	0.48214	15.4544	18.4395
0.42016	0.50126	15.733	19.2185
0.31672	0.55373	16.6917	17.8439
0.33014	0.61626	17.1621	15.0965
0.85512	0.59986	16.0205	12.4156
2.1388	0.60751	13.8697	10.5718
4.49551	1.4891	11.4365	9.03115
7.10151	3.29558	8.71705	6.98826
9.26146	5.65753	5.81129	4.56338
11.1592	8.07537	3.46248	2.51822
12.9347	10.0723	1.9905	1.31543
14.5757	11.52	1.003	0.83869
16.0115	12.6197	0.80382	0.81268
17.0363	13.5705	1.13932	0.93527
17.4168	14.3686	1.29851	0.98244
17.0316	14.8573	1.15893	0.91127
15.9162	14.8773	1.05154	0.82504
14.1331	14.2941	0.92474	0.8337
11.7793	12.8545	0.70194	0.8929
8.86638	10.2483	0.56226	0.89786
6.19356	6.49899	0.50065	0.81327
6.5481	2.47653	0.20408	0.68398
8.95859	3.27456	0.49068	0.58235
10.6548	6.43196	0.56923	0.53582
11.2183	8.50474	0.43412	0.51817
11.1596	9.38206	0.41611	0.50762
10.8233	9.27723	0.34642	0.51096
10.4217	8.64666	0.30223	0.53499
10.1326	8.09774	0.36774	0.57332
10.0179	8.0294	0.29188	0.61787
10.1275	8.45325	0.14748	0.65841
10.3233	9.11038	0.15761	0.68873
10.4763	9.73325	0.17825	0.71466
10.6977	10.2105	0.16562	0.74612
10.9617	10.5619	0.29005	0.78563
11.2818	10.8406	0.39856	0.82669
11.6994	11.0762	0.33267	0.8612
11.9986	11.276	0.23286	0.88503
12.0288	11.4255	0.23041	0.89683
11.8969	11.4908	0.2309	0.89456
11.7211	11.451	0.19552	0.87591
11.5556	11.2995	0.13322	0.84336
11.3625	11.0179	0.18888	0.80396
10.9492	10.5838	0.22021	0.76391
10.1275	9.99412	0.21868	0.72872
9.02077	9.25804	0.27834	0.70494
7.76618	8.34501	0.21045	0.69743
6.26588	7.195	0.32419	0.70768
4.54188	5.90415	0.27405	0.73318
2.9459	4.91681	0.14445	0.76572
2.78518	4.84628	0.05305	0.79314
4.51782	5.78483	0.07245	0.80609
7.08184	7.45298	0.17296	0.80192
10.5382	9.73644	0.25341	0.78574
14.3505	12.5771	0.31478	0.77259
17.374	15.7803	0.45372	0.79185
19.576	18.7584	1.04669	0.91726
20.664	20.7419	2.00203	1.28917
19.9504	21.2974	3.06518	1.98756
17.5686	20.1224	4.29385	2.94192
14.2165	17.04	5.7508	4.05267
10.8917	12.6717	7.39209	5.29542
7.92211	8.2201	8.96299	6.61386
5.37664	4.61884	10.4211	7.8703
3.38832	2.31179	11.9457	9.01895
1.83773	1.30185	13.3694	10.1339
0.83652	1.02402	14.5878	11.2554
1.27356	0.90606	15.6348	12.322
1.68518	0.88163	16.3859	13.2144
1.79705	0.98214	16.5149	13.8017
1.71899	1.085	16.0135	13.9017
1.53673	1.07447	15.0367	13.2789
1.2712	0.93497	13.1916	11.7515
0.85892	0.70377	10.6541	9.18571
0.5099	0.45202	8.94631	5.83809
0.28192	0.2892	10.8962	5.06167
0.1569	0.29073	15.0351	9.51349
0.2459	0.34933	18.4235	14.3581
0.3881	0.38489	19.9158	17.2169
0.40177	0.39826	19.5004	17.5072
0.39751	0.40117	17.9602	15.9428
0.23235	0.39849	16.0065	13.6064
0.27688	0.39077	14.1491	11.2192
0.44237	0.38369	12.6539	9.35135
0.40283	0.39507	11.4254	8.4768
0.24021	0.42625	10.3627	8.41312
0.14732	0.46156	9.46555	8.52479
0.16202	0.49816	8.7635	8.47076
0.25523	0.53888	8.30814	8.36568
0.23649	0.57583	8.23466	8.42532
0.13416	0.59408	8.46144	8.64337
0.13376	0.585	8.78613	8.85415
0.27187	0.55262	8.98318	8.91099
0.26836	0.5075	8.79625	8.73093
0.17538	0.4601	8.24924	8.29835
0.1978	0.41774	7.40973	7.69172
0.09251	0.38282	6.42528	7.0291
0.22072	0.35602	5.41073	6.39494
0.24555	0.34044	4.26917	5.87942
0.16918	0.33846	3.37231	5.62478
0.17008	0.34639	4.03967	5.95525
0.10881	0.35638	6.27325	7.39967
0.17505	0.36095	9.66302	10.1038
0.21895	0.3574	13.9794	13.6279
0.20733	0.35896	17.7677	17.3645
0.13677	0.40139	19.4832	20.6369
0.18371	0.49959	19.5768	22.4338
0.21623	0.58514	18.858	21.9033
0.53889	0.5461	17.0869	19.4486
1.51574	0.6134	14.3506	16.1378
3.31867	1.53633	11.3408	12.35
5.63647	3.13655	8.35886	8.32382
7.72074	5.0086	5.62909	4.77737
9.43341	6.74181	3.48258	2.34765
10.9726	8.15164	1.85524	1.20419
12.429	9.28256	0.823	0.91306
13.7783	10.2373	1.25748	0.88832
14.9822	11.1437	1.61053	0.95676
15.9606	12.1074	1.64189	0.96266
16.5202	13.097	1.39048	0.85556
16.4853	13.9002	1.01396	0.73179
15.6853	14.1642	0.53679	0.72899
14.0237	13.5547	0.3766	0.81958
11.765	11.921	0.53751	0.87917
9.20896	9.35744	0.62276	0.86094
6.71363	6.24457	0.43477	0.77889
6.22732	3.26232	0.1654	0.67281
7.92144	2.61351	0.48566	0.5851
9.22454	4.82085	0.58321	0.53373
9.53768	6.70053	0.44977	0.51141
9.33628	7.54367	0.33272	0.50681
9.05628	7.57809	0.42645	0.51758
8.92565	7.24748	0.29429	0.54767
9.02681	6.94344	0.30733	0.59953
9.30957	6.95886	0.35678	0.66447
9.7368	7.42781	0.33031	0.72126
10.2459	8.25644	0.30347	0.75809
10.7076	9.18199	0.20883	0.78588
11.0544	9.97652	0.27981	0.82143
11.4312	10.5704	0.36889	0.86545
11.9285	11.0151	0.36407	0.90411
12.439	11.3793	0.28639	0.92783
12.7776	11.6772	0.26713	0.9391
12.8403	11.8773	0.23271	0.9441
12.7502	11.9396	0.20363	0.94512
12.6121	11.8434	0.24549	0.93959
12.4165	11.6039	0.20929	0.92243
12.1043	11.2662	0.1837	0.89029
11.6174	10.8836	0.17893	0.84538
10.8832	10.4805	0.07102	0.79719
9.93876	10.0318	0.12627	0.75788
9.00139	9.48886	0.23319	0.7341
8.07001	8.77666	0.23493	0.72596
6.74749	7.79656	0.24852	0.73165
4.91134	6.57189	0.10665	0.74997
3.28415	5.47659	0.05964	0.77913
3.79937	5.32284	0.0423	0.81352
6.68933	6.74834	0.21698	0.8429
10.652	9.71369	0.12117	0.85724
15.1588	13.9197	0.09852	0.85602
19.2913	18.652	0.19563	0.85109
22.1487	22.663	0.27719	0.84661
23.3036	24.6974	0.58123	0.81836
22.383	24.4448	1.47462	0.86264
19.7324	22.6867	2.92113	1.5232
16.0993	19.968	4.97043	3.02483
12.2985	16.0818	7.19161	5.07826
8.80516	11.3108	9.07245	7.19564
5.8637	6.75001	10.5755	8.86149
3.57637	3.43929	11.8124	9.86591
2.00844	1.86896	12.799	10.3698
0.99249	1.46397	13.6743	10.6829
1.05779	1.22458	14.5318	11.0824
1.85229	1.14779	15.1952	11.7054
2.11809	1.31069	15.5866	12.473
1.81491	1.4362	15.5414	13.1011
1.49	1.34764	14.8731	13.1918
1.15999	1.06083	13.6043	12.4019
0.76567	0.70188	11.8619	10.6141
0.48539	0.45775	10.0878	8.04048
0.22309	0.42129	8.90385	5.40106
0.11168	0.42119	9.86349	4.54918
0.1935	0.38385	13.0905	6.90976
0.33109	0.35779	16.1816	10.4179
0.43472	0.36904	17.9323	13.283
0.39952	0.39494	17.9734	14.6489
0.42719	0.40949	16.5522	14.321
0.42914	0.41002	14.3778	12.5495
0.30425	0.40131	12.1493	10.0855
0.38156	0.38648	10.3794	7.93939
0.30493	0.38661	9.23951	6.82402
0.17807	0.42258	8.53337	6.7875
0.10532	0.48478	8.01009	7.26736
0.25706	0.55256	7.6449	7.74357
0.4017	0.61211	7.48077	8.06437
0.4061	0.65028	7.53085	8.29088
0.29804	0.65404	7.73034	8.51261
0.25407	0.6246	7.82815	8.70343
0.27948	0.57762	7.68467	8.75791
0.15949	0.52699	7.29448	8.62019
0.11717	0.47882	6.75151	8.31962
0.09265	0.43479	6.21526	7.9602
0.09289	0.39516	5.69292	7.66213
0.16654	0.36361	5.27293	7.47936
0.19076	0.34646	4.91934	7.38113
0.02333	0.34527	4.61271	7.30626
0.29173	0.35632	4.40264	7.2142
0.33173	0.3751	4.25107	7.07794
0.11828	0.39635	4.28886	6.87547
0.09876	0.414	4.32848	6.62019
0.15302	0.42484	4.25102	6.39402
0.14577	0.43017	4.70364	6.36618
0.19823	0.43299	5.7027	6.81295
0.13353	0.43532	7.16778	8.08347
0.10522	0.43919	9.31245	10.3384
0.06857	0.45418	11.614	13.227
0.11672	0.50289	13.3363	15.8984
0.06708	0.58869	14.6506	17.422
0.27586	0.63536	15.752	17.444
0.95157	0.5273	15.616	16.2827
2.5508	0.75331	14.3734	14.2923
4.93588	2.09676	12.2899	11.7632
7.41369	4.20247	9.69979	9.06741
9.67027	6.59844	7.15003	6.384
11.7734	8.7635	4.92427	3.92463
13.7374	10.5006	2.93859	2.09762
15.5605	11.962	1.18983	1.09893
17.2396	13.327	0.7263	0.80385
18.58	14.6062	1.19638	0.93069
19.2538	15.6923	1.59951	1.11199
19.109	16.4769	1.63452	1.1591
17.9549	16.794	1.46144	1.04778
15.9269	16.2871	1.28621	0.86861
13.6029	14.5688	1.01003	0.73698
10.7038	11.5615	0.45314	0.67834
7.37016	7.63794	0.44538	0.63598
6.74411	3.6963	0.46639	0.57412
9.08521	2.90273	0.36069	0.51896
11.0228	5.87382	0.4047	0.51102
11.7453	8.54045	0.45995	0.54731
11.7255	9.89147	0.44686	0.59684
11.3143	9.91567	0.40286	0.64129
10.7617	9.29575	0.36552	0.68266
10.375	8.73498	0.2741	0.72489
10.1968	8.60523	0.17978	0.76338
10.2084	8.94244	0.2238	0.79011
10.3657	9.53382	0.19911	0.80409
10.5749	10.1371	0.18957	0.81573
10.9582	10.6486	0.24648	0.8391
11.416	11.0772	0.34594	0.8809
11.772	11.4404	0.41941	0.93317
12.1691	11.7396	0.3702	0.978
12.5546	11.9629	0.30671	1.0016
12.727	12.0831	0.31706	0.99919
12.6322	12.0908	0.27967	0.96963
12.4018	12.0046	0.21377	0.91341
12.1963	11.843	0.13589	0.8364
12.0027	11.6172	0.06104	0.75364
11.7307	11.3392	0.12143	0.68506
11.3549	11.0132	0.15473	0.64566
10.6775	10.6105	0.22067	0.6427
9.5399	10.0778	0.25773	0.67393
8.16541	9.38887	0.29098	0.72472
6.72829	8.53113	0.12035	0.77614
5.26389	7.49202	0.14792	0.81801
3.84504	6.41016	0.23412	0.84983
3.37019	5.72743	0.52359	0.87412
4.8536	6.00602	0.62978	0.89847
7.38082	7.44969	0.73813	0.93757
10.5021	9.97113	1.03012	1.00452
14.0402	13.3437	1.39368	1.10909
16.5735	16.9612	1.65839	1.27583
18.0828	19.8131	2.09293	1.55685
19.9672	20.9049	2.86392	2.00487
21.2621	20.0781	3.83463	2.63657
20.514	18.2061	5.03343	3.4578
17.9409	16.022	6.69745	4.56909
14.4529	13.5637	8.9169	6.18479
11.0464	10.7928	11.5153	8.37765
7.99464	7.77439	14.1292	10.8927
5.40614	4.8811	16.5073	13.3211
3.28748	2.73664	18.5438	15.3648
1.61479	1.55821	19.951	16.9358
0.84772	0.99932	20.4175	17.9709
1.28269	0.97788	19.9441	18.2248
1.71949	1.34466	18.5444	17.3811
1.9567	1.59145	16.158	15.2773
1.82888	1.50496	13.3587	12.0418
1.42496	1.13737	10.7196	8.24109
1.00896	0.66678	10.193	5.37882
0.68864	0.31844	13.496	6.69893
0.43533	0.32222	17.251	10.7514
0.22807	0.41888	19.2763	14.2576
0.17213	0.45311	19.2341	15.9512
0.22997	0.45188	17.6971	15.6275
0.26712	0.44742	15.6131	13.6671
0.33845	0.44588	13.8246	11.0811
0.31425	0.43696	12.6186	9.24965
0.29732	0.42452	11.7801	8.84487
0.43892	0.43161	11.1462	9.22055
0.51925	0.48228	10.6712	9.57902
0.40585	0.57149	10.3937	9.73672
0.25168	0.66091	10.3125	9.80091
0.23599	0.71772	10.3442	9.86862
0.29014	0.73446	10.4047	9.98845
0.33035	0.71759	10.4996	10.1326
0.32223	0.67638	10.5818	10.2123
0.27482	0.62104	10.511	10.1431
0.18074	0.56483	10.1732	9.8753
0.22021	0.52092	9.49009	9.41349
0.16701	0.49388	8.60179	8.8213
0.14211	0.47887	7.50156	8.18608
0.17693	0.46857	6.19896	7.55282
0.13155	0.45899	4.95521	6.95082
0.10807	0.44998	4.01488	6.56827
0.22251	0.44206	4.09096	6.78659
0.29452	0.43472	5.63541	7.85092
0.30308	0.42672	8.08859	9.72708
0.21128	0.4164	11.4109	12.3641
0.1849	0.40299	15.4071	15.6101
0.14568	0.39332	18.5802	19.0229
0.11341	0.40626	19.7427	21.8749
0.24896	0.43852	20.0412	23.1327
0.48213	0.43117	20.1888	22.1613
1.14612	0.47623	18.8037	19.7308
2.7321	1.13252	16.0607	16.8979
5.31934	2.46411	12.7151	13.5179
8.29503	4.3826	9.50662	9.50398
11.0667	6.80924	6.72497	5.65147
13.4477	9.41445	4.28498	2.80868
15.5342	11.6821	2.36324	1.32916
17.2214	13.3565	1.10919	0.92522
18.3081	14.5354	1.04105	0.90291
18.7578	15.3591	1.40511	0.96841
18.6333	15.8169	1.44312	0.9764
17.7695	15.7446	1.5033	0.9114
16.0358	14.9278	1.43485	0.85382
13.7508	13.2419	1.11315	0.86407
11.4204	10.7355	0.84365	0.91066
8.94562	7.67075	0.7174	0.92718
7.55639	4.56325	0.37375	0.88578
9.70481	3.54988	0.09792	0.79692
12.5199	6.40168	0.36962	0.69731
13.7407	9.62558	0.49619	0.62998
13.4395	11.6192	0.4439	0.61025
12.434	11.9662	0.3475	0.61834
11.424	10.9217	0.3249	0.62603
10.6806	9.3088	0.22061	0.62435
10.1092	8.07638	0.25747	0.62574
9.77335	7.68819	0.3798	0.64527
9.67998	8.03121	0.3151	0.68203
9.68747	8.70741	0.37627	0.71916
9.79363	9.36437	0.29806	0.74761
9.93803	9.86651	0.26247	0.77756
10.128	10.2382	0.33546	0.82009
10.4559	10.5437	0.2888	0.86877
10.8656	10.814	0.19872	0.9047
11.1381	11.0383	0.22811	0.91649
11.1739	11.1849	0.25635	0.90969
10.9646	11.2294	0.27117	0.89736
10.6315	11.1655	0.30454	0.88704
10.3235	10.9839	0.20395	0.87696
9.85956	10.6718	0.13989	0.86095
9.07331	10.2502	0.15027	0.83495
8.13699	9.77827	0.10977	0.80131
7.22803	9.30683	0.0648	0.7694
6.32819	8.83344	0.22229	0.74996
5.56257	8.35006	0.38117	0.74779
5.13654	7.96342	0.19058	0.76076
5.17569	7.8814	0.46495	0.78288
5.75317	8.22948	0.62052	0.80677
6.84557	8.98494	0.30818	0.82532
8.51875	10.1017	0.40827	0.83319
10.3606	11.4852	0.48019	0.82701
11.7007	12.8214	0.182	0.80762
11.7053	13.5701	0.14432	0.78923
12.1656	13.3105	0.27812	0.80046
15.859	12.5493	0.32211	0.83811
18.6824	12.7192	0.73236	0.8262
18.3956	13.7853	2.0394	0.92055
16.2013	14.1154	4.33679	2.00253
13.4881	12.7764	7.36758	4.22767
10.4766	9.87973	10.5171	7.1903
7.44363	6.32305	13.387	10.2616
4.75888	3.33554	15.735	12.7953
2.49232	1.64561	17.442	14.514
0.73158	1.08255	18.4469	15.5015
0.7541	1.03208	18.6993	15.901
1.56479	1.22431	18.192	15.7969
1.82146	1.40869	17.0058	15.2039
1.63922	1.38374	15.3038	14.0715
1.34591	1.14413	13.2587	12.359
1.05227	0.80678	10.918	9.98971
0.77522	0.52861	8.50878	6.9107
0.61951	0.41681	8.32408	4.16695
0.43787	0.40379	11.1304	5.6205
0.16726	0.40353	13.8818	9.29105
0.3014	0.41096	15.163	11.8652
0.32134	0.42658	14.939	12.5092
0.30833	0.43752	13.7408	11.5825
0.25096	0.42841	12.2192	9.92175
0.17533	0.40159	10.7971	8.37482
0.28335	0.37785	9.63266	7.54185
0.46815	0.37804	8.85836	7.50829
0.44731	0.41233	8.52341	7.96645
0.21703	0.46989	8.51878	8.57345
0.11159	0.52897	8.64668	9.12556
0.20273	0.576	8.77363	9.54622
0.20466	0.60626	8.89288	9.83773
0.20629	0.61591	9.01516	10.0463
0.15971	0.60148	9.2304	10.2129
0.11721	0.56783	9.56761	10.3579
0.23343	0.52718	9.84119	10.4814
0.23997	0.48875	9.91277	10.5597
0.18121	0.45593	9.76569	10.5612
0.33565	0.42916	9.46475	10.4564
0.14961	0.40814	9.10273	10.2266
0.45734	0.39527	8.71147	9.88474
0.25912	0.39456	8.33319	9.47293
0.19498	0.40462	7.80152	9.01972
0.20866	0.41767	6.95207	8.4954
0.14929	0.42679	5.92731	7.84846
0.22442	0.42981	4.93654	7.14749
0.20332	0.42756	4.0782	6.67682
0.1689	0.42154	3.94677	6.80939
0.10259	0.41253	5.03471	7.72402
0.06366	0.40083	7.51876	9.34565
0.10218	0.38908	10.6517	11.3895
0.16085	0.3866	12.4457	13.3741
0.11508	0.41672	12.3943	14.7469
0.05366	0.50687	13.8045	15.0273
0.10699	0.6262	17.4709	14.4016
0.46846	0.64339	18.983	13.9847
1.773	0.54174	18.1754	13.8455
4.14911	1.36621	15.8439	12.6387
7.01692	3.32902	12.7705	9.96982
9.55113	5.98112	9.33005	6.6693
11.6029	8.71706	6.24944	3.7655
13.4002	10.8879	3.90207	1.88189
14.9845	12.249	2.01302	1.0385
16.1874	13.0227	0.69668	0.83566
16.9694	13.5301	0.78339	0.94747
17.1606	13.9046	1.39292	1.0932
16.7257	14.0843	1.60329	1.10885
15.8013	13.9524	1.51413	0.99697
14.2813	13.399	1.30394	0.8761
12.2853	12.2232	1.08419	0.83294
10.2854	10.1637	0.97345	0.81443
8.32935	7.20299	0.81564	0.75422
7.3219	3.95822	0.49343	0.65125
9.0191	3.09166	0.42845	0.54932
11.3827	5.61708	0.39151	0.49687
12.6284	8.21983	0.57393	0.50168
12.6694	9.91612	0.4854	0.53515
11.9673	10.2947	0.31467	0.56579
10.9561	9.57596	0.32785	0.57889
9.95689	8.53839	0.48255	0.57682
9.1674	7.80399	0.47126	0.57081
8.67346	7.52623	0.37807	0.57476
8.54294	7.60394	0.19786	0.59259
8.60092	7.90171	0.12007	0.61943
8.66205	8.32066	0.24808	0.65585
8.78459	8.78085	0.23683	0.70566
9.0847	9.21039	0.18465	0.76383
9.5059	9.5612	0.13552	0.81731
9.83692	9.82819	0.24483	0.8578
10.1553	10.034	0.37648	0.88571
10.4627	10.1937	0.35711	0.9027
10.5744	10.3085	0.2529	0.90636
10.4635	10.3688	0.17767	0.89076
10.3871	10.3561	0.14142	0.85225
10.4777	10.2496	0.13939	0.79649
10.3204	10.0408	0.13972	0.73802
9.74028	9.74689	0.10026	0.69268
8.83087	9.38521	0.24865	0.67073
7.75733	8.9501	0.32968	0.67368
6.74285	8.44286	0.33109	0.6952
5.59889	7.877	0.30081	0.72561
4.47585	7.30718	0.13544	0.75668
4.01098	6.94972	0.1862	0.78359
4.50368	7.12308	0.24904	0.80366
5.73845	7.92196	0.25574	0.81269
7.64172	9.18938	0.24679	0.80445
10.3003	10.8214	0.30212	0.77778
12.8332	12.7804	0.39123	0.74441
14.2492	14.8603	0.81307	0.7334
16.1845	16.5146	1.65432	0.82834
19.224	17.1003	2.83857	1.26695
20.1526	16.6874	4.37834	2.33618
18.721	15.8896	6.64641	4.11825
16.0455	14.3887	9.3169	6.45582
12.9523	11.6579	11.9973	8.99945
9.7867	8.29491	14.769	11.4056
6.6776	5.19812	17.3094	13.5449
4.02789	2.88648	19.0965	15.3764
2.02183	1.60231	20.0198	16.7514
0.79353	1.12069	20.1032	17.4958
1.21721	1.0131	19.3448	17.4968
1.5537	1.21049	17.7761	16.6904
1.7026	1.47789	15.4348	15.0542
1.67949	1.54347	12.6331	12.4907
1.45773	1.32035	9.90567	8.91039
1.26531	0.90383	9.31364	5.36019
0.8845	0.5022	12.0759	6.33468
0.4772	0.36025	15.2204	10.4791
0.28516	0.41891	16.8335	13.4599
0.23031	0.43509	16.6448	14.1746
0.28765	0.39745	15.2543	13.0234
0.15881	0.36097	13.5117	10.9486
0.15003	0.35503	11.9884	8.90979
0.26813	0.37634	10.821	7.68157
0.27908	0.40956	10.0385	7.51255
0.27203	0.44481	9.54709	8.03407
0.3571	0.48554	9.10324	8.70348
0.41881	0.54051	8.87169	9.22242
0.39225	0.60425	8.95468	9.55997
0.35766	0.65337	9.18433	9.79195
0.30286	0.67227	9.44972	9.98913
0.19806	0.66505	9.59513	10.1547
0.10594	0.64067	9.63022	10.2483
0.07898	0.6027	9.70785	10.2409
0.11121	0.55376	9.69231	10.1229
0.21861	0.50233	9.40837	9.90688
0.26279	0.45964	8.93673	9.60848
0.13591	0.43125	8.31839	9.22909
0.09551	0.41668	7.71092	8.78566
0.09822	0.4125	7.3125	8.32188
0.16224	0.4137	6.86369	7.86
0.17031	0.41569	6.16003	7.35334
0.05585	0.41577	5.33011	6.72338
0.11165	0.41421	4.28926	6.0022
0.17025	0.41384	3.3787	5.47199
0.17653	0.41717	3.6959	5.6172
0.17418	0.42428	5.34505	6.77502
0.21423	0.43315	8.02983	8.95609
0.13231	0.44219	11.8388	11.9208
0.03677	0.45493	15.3512	15.2326
0.09613	0.4845	17.34	18.3301
0.13944	0.54482	18.5613	20.4179
0.21165	0.61847	19.1429	20.8603
0.4093	0.63486	17.836	19.8679
1.19753	0.59001	15.4276	17.8058
3.00787	0.98462	12.8643	14.5339
5.3842	2.07497	10.0472	10.36
7.42414	3.63084	7.23821	6.30595
9.0563	5.50317	4.73535	3.2671
10.5185	7.41714	2.70537	1.56523
11.9489	8.98694	1.35377	0.92887
13.3176	10.066	0.75241	0.78691
14.5526	10.8575	1.187	0.89276
15.6934	11.6431	1.82274	1.02986
16.4268	12.5194	1.89137	1.04489
16.5505	13.3668	1.5083	0.95171
16.0799	13.9479	1.00282	0.87556
14.8774	13.9725	0.68703	0.8761
13.0671	13.2263	0.69856	0.86916
11.1696	11.699	0.55353	0.78941
9.05376	9.43492	0.25196	0.64713
6.96905	6.4275	0.23716	0.49859
7.34122	3.3463	0.52584	0.41011
9.30168	4.06603	0.64431	0.40501
10.5372	7.28402	0.57585	0.4495
10.6982	9.46574	0.42057	0.50142
10.061	9.98508	0.36756	0.5416
9.04919	9.32442	0.4608	0.5688
8.19703	8.30966	0.55756	0.58778
7.80997	7.52498	0.65741	0.60386
7.82848	7.20604	0.49975	0.61761
7.98398	7.38619	0.30204	0.63171
8.26815	7.98061	0.40163	0.65819
8.66728	8.79323	0.46154	0.70645
9.11355	9.60691	0.46729	0.76822
9.7512	10.2923	0.41135	0.82215
10.5526	10.8326	0.38056	0.854
11.3061	11.2609	0.40723	0.86471
11.8984	11.5986	0.39437	0.86028
12.2981	11.8652	0.27042	0.84223
12.5039	12.0764	0.09607	0.80705
12.5868	12.2167	0.05786	0.75335
12.6091	12.2541	0.14501	0.6908
12.6177	12.1609	0.18739	0.63787
12.3799	11.9188	0.16251	0.60954
11.6218	11.5344	0.07035	0.61094
10.7581	11.0407	0.1271	0.63803
10.1457	10.4651	0.14838	0.67816
9.35009	9.78095	0.23784	0.71509
8.04237	8.91729	0.29669	0.73903
6.52724	7.88226	0.12133	0.74986
5.04926	6.86576	0.14336	0.75209
3.88008	6.17177	0.28228	0.74965
3.63708	6.01903	0.24543	0.74307
4.72829	6.49999	0.0572	0.72976
6.82428	7.69129	0.18397	0.70762
9.97109	9.64884	0.11784	0.68109
13.4402	12.3536	0.28923	0.66341
15.8992	15.4694	0.40262	0.6645
18.2284	18.2376	0.66061	0.68985
21.0507	19.81	1.2353	0.832
22.1729	19.645	2.27544	1.34594
20.8811	17.92	4.33762	2.38891
17.9752	15.4026	7.03938	4.00947
14.3678	12.348	9.72024	6.21904
10.5344	8.72661	12.0681	8.76863
7.00389	5.25998	13.9749	11.1518
4.24679	2.79466	15.6822	12.9844
2.34284	1.64178	17.2667	14.2236
0.94096	1.37419	18.39	15.041
0.78418	1.23561	18.768	15.5727
1.26184	1.17181	18.322	15.7633
1.71291	1.2915	17.2167	15.4118
2.19432	1.4133	15.5638	14.2937
1.80405	1.3591	13.3834	12.2849
1.09994	1.09472	10.9217	9.48288
1.02728	0.71076	9.157	6.24808
0.96813	0.37876	10.5934	4.46236
0.71349	0.29595	14.3617	7.4528
0.45086	0.36493	17.5732	11.931
0.31959	0.39854	19.0542	15.3115
0.55042	0.4015	18.8281	16.5739
0.50445	0.40952	17.4907	15.6198
0.42423	0.43103	15.671	13.2643
0.48032	0.45452	13.8747	10.7647
0.50956	0.4691	12.2942	9.11529
0.5273	0.47634	11.0998	8.56836
0.42292	0.4846	10.3179	8.70663
0.22995	0.50009	9.75379	9.03675
0.17087	0.52082	9.41387	9.27982
0.2266	0.53631	9.26086	9.3849
0.25711	0.54333	9.23288	9.46855
0.18235	0.55233	9.34849	9.62568
0.09805	0.57117	9.58926	9.80952
0.13716	0.59235	9.88092	9.90535
0.32345	0.60051	9.94991	9.82712
0.35068	0.58882	9.59579	9.54258
0.23702	0.56034	8.90382	9.07001
0.29512	0.51833	7.94429	8.47212
0.38163	0.46526	6.80963	7.80348
0.12147	0.40795	5.69202	7.09465
0.36079	0.35784	4.58348	6.47328
0.33719	0.32397	3.67075	6.23095
0.2436	0.30781	3.76753	6.64398
0.25677	0.30766	5.40848	7.80872
0.23655	0.3231	8.50326	9.78921
0.21638	0.35604	12.7017	12.6051
0.208	0.40979	16.3972	16.0354
0.04886	0.48325	18.4603	19.4539
0.17974	0.55868	19.4764	21.6352
0.251	0.58079	19.813	21.4931
0.79452	0.52806	18.6144	19.391
2.23573	0.95847	16.1575	16.4602
4.71254	2.31135	13.446	13.0311
7.59775	4.2695	10.445	9.21306
10.1668	6.48243	7.29588	5.62041
12.3276	8.71243	4.62105	2.9014
14.1932	10.7426	2.46034	1.39005
15.6764	12.3168	1.07337	0.95451
16.7904	13.3725	1.13457	0.96962
17.5443	14.0817	1.55606	1.07274
17.6537	14.5873	1.60575	1.0974
16.9648	14.8179	1.32109	0.98428
15.4147	14.4868	0.99004	0.79039
13.2618	13.2532	0.83283	0.66119
10.901	10.9595	0.78012	0.6741
8.27692	7.77883	0.73868	0.71886
6.40429	4.31469	0.40627	0.70829
7.50193	2.35258	0.10805	0.6417
9.62239	4.32801	0.28439	0.56415
10.714	6.81206	0.4136	0.5289
10.7235	8.3049	0.45761	0.55079
10.2239	8.61099	0.4148	0.59824
9.65149	8.17817	0.41665	0.63061
9.2238	7.56321	0.20037	0.63504
9.04068	7.1496	0.2663	0.6267
9.10426	7.14183	0.31042	0.62383
9.29721	7.56509	0.23235	0.63241
9.60215	8.26691	0.11503	0.64629
9.99405	9.00062	0.28452	0.66312
10.2295	9.59549	0.17967	0.69419
10.3546	10.0303	0.2657	0.74887
10.5788	10.3682	0.36774	0.81687
10.9569	10.665	0.32862	0.87428
11.3636	10.9209	0.28689	0.90517
11.5011	11.0983	0.2551	0.91025
11.3167	11.1571	0.17852	0.89791
11.0194	11.0798	0.14978	0.87491
10.7154	10.8835	0.17147	0.84332
10.3914	10.608	0.1115	0.80312
9.98597	10.2979	0.11035	0.75849
9.35779	9.97691	0.1554	0.71955
8.37109	9.63535	0.06543	0.69722
7.26764	9.25362	0.12108	0.69796
6.34889	8.79582	0.23038	0.72071
5.43082	8.24241	0.34484	0.7553
4.6047	7.71327	0.27684	0.78715
4.30006	7.46303	0.08653	0.80575
4.73449	7.66464	0.06222	0.80712
5.64858	8.30497	0.19843	0.79172
7.18366	9.38139	0.20854	0.7638
9.70517	10.9525	0.10955	0.73148
12.0923	12.8505	0.2455	0.70764
12.8657	14.4673	0.31894	0.71053
13.1	15.0511	0.60704	0.75812
15.4807	14.5103	1.16332	0.87593
18.2234	13.7217	1.98526	1.16777
18.3944	13.345	3.22586	1.85013
16.5311	12.9509	4.76644	3.03789
13.9075	11.8143	6.46175	4.61087
10.9159	9.54309	8.27853	6.28855
7.87307	6.48956	10.0379	7.81116
5.35988	3.64487	11.7194	9.12819
3.38723	1.76295	13.3534	10.3427
1.68854	0.97199	14.764	11.5152
0.44661	0.88987	15.8244	12.5986
1.0691	1.02564	16.4346	13.497
1.66128	1.19534	16.502	14.1235
1.80684	1.28934	15.9999	14.3446
1.72542	1.24829	14.9648	13.892
1.49258	1.06854	13.2735	12.4596
1.09734	0.80568	11.1302	9.95359
0.70673	0.53885	9.27812	6.73941
0.42328	0.31883	9.04058	4.23311
0.28357	0.22647	11.7686	5.33569
0.26238	0.28797	15.4964	8.76991
0.36467	0.35917	18.095	12.1915
0.44104	0.40545	19	14.3924
0.41765	0.44116	18.2663	14.9005
0.30267	0.469	16.5188	13.939
0.35433	0.48096	14.5224	12.005
0.42632	0.47811	12.714	9.85671
0.49634	0.47821	11.3394	8.39511
0.46703	0.49224	10.4912	7.96895
0.2877	0.51234	10.0082	8.1179
0.16108	0.5286	9.64577	8.33539
0.16124	0.53842	9.36011	8.49674
0.15112	0.54394	9.20363	8.62388
0.17469	0.54706	9.12742	8.71277
0.22673	0.54827	9.16488	8.76464
0.24514	0.54777	9.30691	8.78757
0.22957	0.54557	9.40133	8.78453
0.24319	0.54103	9.35401	8.73312
0.19606	0.53181	9.10349	8.56687
0.28388	0.51427	8.55381	8.21322
0.21868	0.48645	7.68994	7.63834
0.13739	0.45096	6.40319	6.8568
0.2186	0.41543	4.62438	5.89899
0.22724	0.38815	2.79347	4.93407
0.20816	0.37365	2.83427	4.76213
0.14162	0.37299	5.18188	6.44541
0.15569	0.38271	8.66336	9.81258
0.14757	0.39583	13.7514	14.4508
0.19802	0.41401	19.1781	20.0244
0.13768	0.45419	22.4861	25.372
0.21207	0.50067	22.8855	28.5618
0.62906	0.45531	21.3334	28.2606
1.77787	0.45731	18.6933	24.5618
3.93772	1.40969	15.0957	18.6481
6.82081	3.23147	11.303	12.3828
9.65337	5.56139	8.11148	7.54623
12.0513	7.94622	5.31756	4.51028
14.0901	10.1119	2.80318	2.50784
15.6945	11.9449	1.16173	1.14724
16.8587	13.3274	0.73595	0.70621
17.624	14.2114	1.36692	0.98111
17.9297	14.6574	1.92448	1.12361
17.6521	14.7167	1.81009	1.03893
16.6711	14.3308	1.2229	0.85234
14.8109	13.3526	0.70466	0.75611
12.3171	11.6908	0.42296	0.80701
9.47366	9.3237	0.40822	0.86758
6.63733	6.30145	0.51829	0.8588
6.38726	3.15238	0.22471	0.78371
8.3422	2.39921	0.14049	0.67719
9.52273	4.65757	0.31946	0.5958
9.49282	6.60914	0.44537	0.58401
9.03186	7.45406	0.31374	0.62967
8.63116	7.30875	0.12938	0.68562
8.27851	6.84177	0.12502	0.72141
8.03709	6.6056	0.33717	0.74169
8.06527	6.78776	0.42824	0.76325
8.42548	7.35155	0.18182	0.78971
9.0137	8.12263	0.40479	0.80995
9.58879	8.89822	0.3414	0.81661
10.082	9.58345	0.27215	0.8202
10.5909	10.1806	0.26773	0.83755
11.141	10.686	0.29137	0.87106
11.7353	11.0703	0.2339	0.90775
12.227	11.3174	0.30984	0.93512
12.4635	11.4472	0.35115	0.94812
12.5243	11.5019	0.40136	0.94433
12.4428	11.5102	0.41024	0.9219
12.3308	11.477	0.30835	0.88254
12.267	11.3938	0.09489	0.83327
12.0714	11.2471	0.12445	0.78517
11.6091	11.0187	0.11888	0.74917
10.8867	10.6658	0.08623	0.73136
9.90744	10.1226	0.1052	0.73338
8.81483	9.36408	0.21848	0.75344
7.6832	8.46041	0.37086	0.78452
6.28659	7.55609	0.42477	0.81632
4.77974	6.78217	0.20996	0.84118
3.75614	6.24463	0.06164	0.85506
3.86144	6.1263	0.13901	0.85629
5.30417	6.64531	0.03117	0.84744
7.4146	7.97684	0.16441	0.83384
10.1704	10.1779	0.16652	0.81725
13.4432	12.9925	0.14419	0.79516
16.4862	15.8417	0.08951	0.76967
18.7949	18.0686	0.20165	0.75743
20.4216	19.2309	0.29044	0.77571
20.846	19.1785	0.66381	0.82103
19.677	18.1547	1.7915	0.98698
17.126	16.7487	3.89422	1.68575
13.9152	14.8915	6.36942	3.22701
10.5237	11.8669	8.57173	5.41669
7.30823	7.88594	10.4643	7.76156
4.64385	4.18074	12.1043	9.77599
2.62589	1.87079	13.6188	11.224
1.16773	1.26852	15.047	12.1874
0.93373	1.22001	16.2456	12.9178
1.299	1.14989	16.9743	13.5772
1.59168	1.18472	17.0289	14.1101
1.8673	1.24607	16.4614	14.3092
1.76297	1.20438	15.3745	13.9746
1.05878	1.02691	13.7051	12.99
0.4911	0.76496	11.6897	11.203
0.34969	0.50817	9.80369	8.43697
0.19394	0.32931	8.91291	5.16723
0.68388	0.27636	10.7115	4.76565
0.7154	0.29651	14.1505	8.35356
0.43364	0.31313	16.8114	11.8073
0.3687	0.32721	17.9709	13.797
0.39847	0.35223	17.7014	14.1806
0.28412	0.38952	16.3556	13.138
0.15188	0.43148	14.5267	11.2099
0.31356	0.46765	12.7275	9.25055
0.50844	0.49502	11.261	7.93847
0.25907	0.51977	10.3311	7.50457
0.05448	0.5463	9.93178	7.71107
0.19849	0.56393	9.81952	8.13443
0.15188	0.56051	9.77202	8.51331
0.14902	0.54249	9.71182	8.78546
0.23883	0.527	9.65069	8.97914
0.24216	0.52129	9.67853	9.08901
0.24005	0.51729	9.73494	9.06378
0.28632	0.50532	9.61391	8.87015
0.28884	0.48611	9.14337	8.51861
0.07196	0.46716	8.30382	8.06027
0.07326	0.45384	7.32292	7.54554
0.0955	0.44612	6.37209	7.0078
0.32062	0.44004	5.50357	6.52947
0.3166	0.43063	4.69118	6.23295
0.05199	0.41511	3.86637	6.16202
0.21708	0.39712	3.62013	6.29496
0.23349	0.3884	4.35147	6.77027
0.18727	0.39862	5.99989	7.98035
0.12933	0.42161	8.53909	10.231
0.15351	0.44102	12.2819	13.4495
0.23998	0.45043	16.4505	17.3687
0.18227	0.46362	19.038	21.5407
0.20635	0.49856	19.735	24.8724
0.41816	0.53712	19.4968	25.7819
0.48036	0.5044	18.2664	23.5368
0.86573	0.4469	15.9713	19.13
2.31573	1.08298	13.2423	14.3315
4.79556	2.50838	10.7341	10.3101
7.37773	4.38263	8.13732	7.30298
9.41957	6.34898	5.30631	4.89084
11.1141	8.1947	3.04942	2.77709
12.8439	9.81623	1.62138	1.14324
14.5143	11.1279	0.85578	0.51961
15.9416	12.1847	1.14995	0.84499
17.1311	13.1732	1.33167	1.0022
17.8954	14.1859	1.27329	0.96611
18.0209	15.0729	1.07841	0.84738
17.3834	15.4765	0.98571	0.75731
15.8527	15.0305	0.70478	0.75294
13.7944	13.5365	0.39336	0.79577
11.3987	11.0274	0.40594	0.8293
8.30898	7.80797	0.4747	0.81954
6.31482	4.35477	0.29946	0.75905
7.41772	2.21799	0.292	0.67643
9.0544	4.47485	0.69116	0.61678
9.76888	7.07528	0.52305	0.59511
9.63488	8.55207	0.38644	0.58427
9.2256	8.91075	0.44355	0.56286
8.87138	8.55215	0.25094	0.54499
8.58467	7.99022	0.33404	0.5514
8.54902	7.66561	0.41808	0.57948
8.88974	7.80418	0.40746	0.61561
9.48063	8.39492	0.21473	0.65622
10.061	9.22436	0.24977	0.71137
10.4646	10.0313	0.3319	0.78874
10.7934	10.6717	0.41181	0.87641
11.2264	11.1449	0.43475	0.94891
11.7378	11.5098	0.40331	0.99011
12.2116	11.7986	0.4593	1.00113
12.5646	12.004	0.435	0.989
12.786	12.1082	0.27308	0.95817
12.839	12.1104	0.12897	0.91158
12.7253	12.0366	0.07824	0.85489
12.589	11.9148	0.09681	0.79856
12.4606	11.7531	0.13178	0.75432
12.1414	11.5468	0.13473	0.72893
11.7123	11.2911	0.10067	0.72407
11.4012	10.9697	0.04999	0.73822
10.8818	10.5244	0.11416	0.76405
9.86985	9.85963	0.08598	0.78912
8.5716	8.92111	0.10141	0.80302
7.06829	7.76773	0.25138	0.80115
5.10873	6.5537	0.40192	0.78507
2.98211	5.459	0.21258	0.76332
2.33507	4.85064	0.09164	0.74624
4.02715	5.5006	0.05622	0.73704
6.61571	7.63229	0.10245	0.73103
10.4013	10.742	0.19694	0.72472
15.1286	14.5534	0.40692	0.72567
19.0974	18.8555	0.70446	0.75278
22.1406	22.7869	1.26673	0.84001
23.9837	24.9428	2.14291	1.09649
23.3451	24.5855	3.53069	1.78344
20.6523	22.1376	5.68908	3.16795
17.1329	18.3136	8.30566	5.26736
13.3199	13.8451	10.9415	7.7996
9.41531	9.62667	13.2654	10.2906
6.04606	6.096	15.1622	12.3071
3.49453	3.29177	16.7375	13.7078
1.7179	1.40324	17.8362	14.5993
0.75577	0.89634	18.2486	15.0967
1.40147	1.26274	17.9628	15.2307
2.16697	1.57688	16.9867	14.9528
2.26148	1.75166	15.4344	14.165
1.92838	1.72111	13.4547	12.7725
1.46875	1.43295	11.2987	10.6187
0.96327	0.96348	9.33164	7.56744
0.55702	0.50182	9.28439	4.59462
0.408	0.31851	12.2882	5.97163
0.30036	0.4032	15.5454	10.1175
0.21115	0.44165	17.2612	13.2537
0.37294	0.42042	17.3211	14.3658
0.51495	0.40375	16.2507	13.6752
0.38195	0.42037	14.6852	11.8612
0.16258	0.44958	13.1417	9.75766
0.17309	0.4648	11.89	8.23176
0.25711	0.4691	11.0167	7.76505
0.22175	0.48295	10.4378	8.13406
0.25514	0.51346	10.0573	8.73463
0.21961	0.54045	9.87186	9.17374
0.19039	0.54495	9.77688	9.38344
0.2493	0.53696	9.69584	9.44314
0.26269	0.54122	9.63176	9.46081
0.23894	0.56843	9.5626	9.47856
0.26573	0.60458	9.55435	9.46378
0.2407	0.62504	9.56757	9.38025
0.27096	0.61762	9.38462	9.21309
0.26717	0.5864	8.8172	8.95716
0.1773	0.53823	8.02365	8.58838
0.1075	0.47766	7.19249	8.06404
0.28932	0.41175	6.23803	7.39079
0.26125	0.35254	5.24174	6.66732
0.08655	0.31305	4.16472	6.03558
0.27359	0.30116	3.22644	5.61684
0.2929	0.31866	3.51516	5.59775
0.30726	0.36026	4.75673	6.33742
0.21916	0.40974	6.67232	8.09949
0.10046	0.44596	9.85305	10.8676
0.11521	0.45951	14.0695	14.5772
0.11418	0.46033	17.6749	18.9678
0.08258	0.46726	19.4496	22.9886
0.15995	0.4846	19.9417	24.9765
0.24033	0.47945	19.2341	23.9593
0.58088	0.41314	16.9148	20.436
1.56806	0.51133	13.8401	15.7592
3.47755	1.25389	10.8814	11.3033
5.67069	2.6154	8.08541	7.86153
7.39474	4.39116	5.76619	5.21535
8.65483	6.19976	3.66141	2.95495
9.6692	7.66447	1.59934	1.21244
10.6389	8.60331	0.84652	0.58332
11.6755	9.09754	1.20585	0.94528
12.7063	9.41436	1.54653	1.10502
13.7043	9.83422	1.58001	1.04266
14.5421	10.5146	1.33509	0.88995
14.9324	11.3889	1.21896	0.7917
14.7028	12.1844	0.94233	0.81198
13.7074	12.5534	0.50482	0.87645
12.031	12.1268	0.35015	0.91159
10.235	10.6185	0.25466	0.89165
8.5204	8.04649	0.36133	0.81965
6.83757	4.83407	0.45189	0.72573
7.0099	2.23116	0.2774	0.6525
9.34774	3.58793	0.38626	0.61821
11.384	6.36352	0.60859	0.60178
12.0548	8.59503	0.57871	0.58418
11.5999	9.65618	0.47142	0.57858
10.7338	9.52365	0.34982	0.5988
9.99271	8.75302	0.38081	0.63618
9.50677	7.92605	0.25539	0.67733
9.2085	7.37383	0.24822	0.71905
8.97228	7.21866	0.29255	0.76925
8.79579	7.42073	0.15379	0.83318
8.80105	7.84614	0.13241	0.90136
9.08626	8.34975	0.19332	0.95611
9.60433	8.83496	0.25641	0.98726
10.0738	9.25551	0.24568	0.99572
10.4364	9.5985	0.29109	0.98519
10.7208	9.86394	0.3049	0.9588
10.8413	10.042	0.25853	0.92222
10.8733	10.1211	0.15091	0.88396
10.8997	10.0896	0.08784	0.85183
10.8379	9.93263	0.16561	0.83017
10.623	9.64995	0.20075	0.81956
10.1423	9.26298	0.16355	0.81886
9.30984	8.79889	0.11503	0.8263
8.33098	8.25793	0.17674	0.83774
7.30161	7.61578	0.31342	0.84643
6.07789	6.88203	0.17428	0.84612
4.63104	6.0926	0.10008	0.83406
3.1526	5.31072	0.05764	0.81314
2.71532	4.81536	0.17451	0.79341
4.105	5.15185	0.36753	0.78675
6.52775	6.64465	0.44817	0.79712
10.2967	9.29113	0.49632	0.81806
15.3901	13.1095	0.66276	0.84788
19.6771	17.8225	1.01575	0.92761
21.9624	22.5009	1.83506	1.17205
22.2848	25.695	3.05019	1.69954
20.7696	25.9722	4.34243	2.53275
17.9453	23.0113	6.03841	3.69603
14.4561	18.2766	8.31181	5.30829
11.0176	13.6579	10.8782	7.40625
7.809	9.63268	13.3165	9.7664
4.90491	5.99369	15.4173	12.0057
2.74688	3.07929	17.2205	13.8151
1.21254	1.4588	18.5239	15.1161
1.09224	1.20383	19.1213	15.9565
1.60963	1.28251	18.9705	16.3156
1.69795	1.33432	18.049	16.0918
1.65324	1.3633	16.2884	15.1277
1.46319	1.27656	13.8321	13.2697
1.18738	1.03743	11.2262	10.5445
0.83625	0.69303	9.39389	7.2146
0.49641	0.36865	10.6799	4.65783
0.31663	0.27849	14.2767	6.73439
0.31697	0.3535	17.1504	11.073
0.31143	0.38976	18.177	14.4808
0.28938	0.3948	17.4652	15.7473
0.31931	0.4141	15.7269	14.7032
0.31496	0.44741	13.8569	12.2058
0.21214	0.4701	12.3064	9.61868
0.27961	0.48263	11.0842	8.04324
0.18589	0.50103	10.2542	7.71401
0.2663	0.53016	9.8453	8.06108
0.16203	0.56042	9.73405	8.56609
0.08895	0.58248	9.78087	9.02126
0.21621	0.59477	9.89881	9.36616
0.32598	0.59997	10.0144	9.58102
0.34192	0.6042	10.0104	9.66201
0.24252	0.61608	9.85675	9.63127
0.16749	0.63805	9.69787	9.50826
0.19275	0.65892	9.53388	9.2852
0.30353	0.66118	9.09579	8.94733
0.31217	0.63819	8.30143	8.50614
0.15461	0.59714	7.32469	8.00649
0.03272	0.54807	6.38269	7.48356
0.10313	0.49952	5.63842	6.94178
0.11533	0.45878	4.95653	6.41657
0.086	0.43024	4.11727	5.99513
0.09627	0.41762	3.51724	5.75757
0.18585	0.42473	3.56843	5.7942
0.26233	0.45043	4.63773	6.34941
0.11278	0.488	6.50563	7.79892
0.06447	0.52785	8.97019	10.2508
0.21823	0.55723	12.1274	13.3569
0.09014	0.56814	15.6909	16.5816
0.11985	0.57441	18.7287	19.3674
0.16721	0.60524	20.136	20.9698
0.19609	0.65372	19.7491	20.7605
0.48713	0.63324	18.023	18.9764
1.58731	0.51823	15.3342	16.2872
3.4958	1.0607	12.2883	12.9267
5.78012	2.52926	9.27753	9.25684
7.75319	4.51077	6.52647	6.06198
9.17316	6.52653	4.21475	3.71913
10.3678	8.10667	2.42337	2.05937
11.5817	9.12727	1.17384	0.93715
12.8399	9.85458	1.04478	0.54871
14.1404	10.6154	1.43418	0.79589
15.2325	11.5023	1.85301	0.95538
15.9983	12.3925	1.74454	0.9254
16.3955	13.1205	1.19489	0.78758
16.0452	13.4872	0.94326	0.70077
14.6773	13.2345	0.82003	0.74344
12.6823	12.2086	0.44746	0.80829
10.5898	10.3896	0.30156	0.80995
8.0928	7.81056	0.32722	0.74236
6.27947	4.73886	0.30312	0.64535
7.51918	2.22955	0.34526	0.57137
9.49532	3.61104	0.47783	0.54192
10.2975	6.33963	0.49444	0.54187
10.1129	8.1799	0.49324	0.549
9.58299	8.82428	0.44449	0.55547
8.98209	8.68847	0.42823	0.56664
8.56137	8.28706	0.36291	0.58559
8.42106	7.98042	0.25112	0.6097
8.45616	7.98512	0.11872	0.63646
8.62664	8.32137	0.14835	0.66879
8.92391	8.83004	0.13291	0.71689
9.31273	9.35605	0.279	0.78448
9.68795	9.84481	0.27688	0.85488
10.0059	10.2724	0.22205	0.90067
10.3889	10.6026	0.30903	0.90802
10.8268	10.8115	0.35012	0.88641
11.0535	10.914	0.30467	0.85557
11.0624	10.955	0.22192	0.82901
11.1633	10.9749	0.20101	0.80965
11.4088	10.9926	0.21824	0.79512
11.6074	11.0033	0.20055	0.78399
11.6202	10.9772	0.18253	0.77794
11.3408	10.8679	0.09773	0.78016
10.6948	10.6169	0.0278	0.79276
9.86507	10.1718	0.0813	0.81323
8.99515	9.53284	0.07509	0.83214
7.99125	8.77135	0.13667	0.83715
6.6888	7.99293	0.16248	0.82199
5.11488	7.27533	0.05556	0.79192
3.72092	6.69016	0.17561	0.76018
3.38571	6.39763	0.24197	0.73947
4.15515	6.57601	0.10257	0.73562
5.51665	7.33958	0.05392	0.74495
7.49372	8.72785	0.12306	0.75641
10.0178	10.5705	0.03481	0.76174
12.507	12.4865	0.08205	0.76725
13.7488	14.0454	0.1075	0.78862
14.0097	14.882	0.19199	0.82844
15.7554	14.8401	0.47511	0.86173
18.4244	14.4951	1.13222	0.89345
18.8775	14.8568	2.53517	1.23622
17.1998	15.2286	4.70615	2.39166
14.4972	13.9515	7.20621	4.34127
11.4055	10.8623	9.7224	6.71503
8.30922	7.10558	12.1502	9.08461
5.59868	3.90635	14.5457	11.2682
3.48798	1.98367	16.8217	13.2687
1.8149	1.33377	18.6268	15.015
0.58502	1.16787	19.6277	16.3281
1.05327	1.06227	19.7718	16.9996
1.66158	1.0595	19.0783	16.8486
1.81685	1.15182	17.6483	15.7494
1.66432	1.1963	15.6117	13.6826
1.38194	1.09991	13.2441	10.8407
1.02447	0.87593	10.8305	7.63449
0.71403	0.58099	9.66328	5.30363
0.47546	0.30444	12.283	6.54352
0.33509	0.21617	16.3835	9.89981
0.17548	0.30402	19.0572	12.967
0.35182	0.37808	19.6168	14.8459
0.65688	0.42019	18.5818	15.0224
0.5638	0.4457	16.8076	13.667
0.33734	0.4565	14.817	11.6303
0.25768	0.44985	12.8903	9.76461
0.33434	0.43548	11.3009	8.68038
0.44063	0.43614	10.0493	8.50637
0.45464	0.46921	9.12747	8.74915
0.38102	0.52215	8.57308	8.92455
0.31909	0.57427	8.31322	8.96218
0.29511	0.62335	8.32956	9.09558
0.26673	0.67205	8.65703	9.47578
0.28466	0.7101	9.24204	9.9742
0.22984	0.71714	9.87679	10.3917
0.29598	0.68101	10.4575	10.6419
0.26639	0.61026	10.7823	10.7182
0.31099	0.52623	10.5346	10.5964
0.33223	0.44847	9.94553	10.2303
0.17244	0.38818	9.26232	9.61954
0.39227	0.34743	8.33734	8.84027
0.31132	0.32397	7.18572	8.00627
0.24524	0.3178	5.74481	7.1918
0.39736	0.33219	4.30708	6.48941
0.30954	0.36869	3.64889	6.23428
0.1894	0.41826	4.50104	6.91468
0.15321	0.4599	6.78006	8.70429
0.04521	0.47426	10.3212	11.5039
0.11468	0.46961	14.1176	15.0663
0.08104	0.49931	16.7701	18.6278
0.08745	0.59433	18.7726	21.0661
0.2961	0.64777	20.3988	21.678
1.03976	0.49553	20.1658	20.3263
2.71092	0.90838	18.245	17.3512
5.55118	2.68373	15.0335	13.7774
8.73426	5.36549	11.4979	10.5126
11.4986	8.36971	8.29911	7.44424
13.8228	10.9724	5.33764	4.42941
15.7437	12.816	2.8737	1.97098
17.2993	13.9907	1.15211	0.77431
18.3879	14.716	0.81312	1.02227
18.7928	15.1557	1.60511	1.23765
18.4427	15.3561	1.89538	1.2118
17.3702	15.229	1.89231	1.01964
15.5973	14.6	1.53154	0.78079
13.3471	13.1822	1.06175	0.67803
10.6956	10.6603	0.79042	0.73231
7.76642	7.05232	0.63896	0.79866
6.39127	3.11895	0.40868	0.79842
8.20902	2.87984	0.0614	0.74269
10.39	5.93141	0.30421	0.68639
11.298	8.34749	0.46282	0.66791
11.1562	9.8122	0.43096	0.67769
10.6258	10.2526	0.37405	0.6778
10.0811	9.78485	0.31843	0.64883
9.60437	8.92346	0.21486	0.61264
9.27626	8.28497	0.31989	0.60446
9.24489	8.14333	0.23275	0.63578
9.46098	8.41422	0.26237	0.69169
9.8093	8.92314	0.19506	0.75285
10.2775	9.54432	0.36838	0.8098
10.6893	10.1736	0.47761	0.85873
11.0671	10.7254	0.2692	0.89734
11.6093	11.1664	0.2969	0.92499
12.2291	11.5144	0.34582	0.94197
12.739	11.7865	0.3784	0.94707
12.9792	11.9669	0.33493	0.93843
12.9493	12.0397	0.18262	0.91857
12.787	12.0113	0.11586	0.8943
12.572	11.894	0.18096	0.87136
12.3909	11.6935	0.2498	0.853
12.0594	11.3862	0.24062	0.8407
11.3485	10.9093	0.17513	0.83273
10.2026	10.2048	0.08193	0.82429
8.64631	9.27472	0.06881	0.81209
6.87375	8.18488	0.26503	0.79854
5.01429	7.01935	0.28823	0.78961
3.60377	6.00927	0.12969	0.78843
4.06034	5.89886	0.23659	0.79212
6.22228	7.36419	0.11247	0.79227
9.35457	10.0023	0.22191	0.77838
13.4493	13.2456	0.19168	0.74851
17.0553	16.7403	0.28848	0.7272
19.1474	19.8606	0.24917	0.75551
20.7754	21.8314	0.16896	0.82648
21.944	22.3481	0.9034	0.94181
21.397	21.412	2.88632	1.46696
18.9312	19.1761	5.96017	2.899
15.375	16.2976	9.39253	5.14366
11.538	13.2349	12.6808	7.88028
8.11198	9.74185	15.6227	10.8458
5.32946	5.96563	17.9958	13.6609
3.02247	2.7718	19.3982	15.7778
1.31419	0.9798	19.7497	16.8649
0.87507	0.98056	19.2152	16.9474
1.5456	1.23972	17.9322	16.1684
1.91321	1.33463	16.1035	14.6485
1.74544	1.30328	13.9216	12.5014
1.43871	1.14031	11.5495	9.85719
1.13524	0.90095	9.05343	6.83147
0.8833	0.66862	8.2894	4.09799
0.65407	0.51314	10.8119	4.95577
0.2816	0.44158	13.757	8.56017
0.25997	0.40272	15.3062	11.638
0.29523	0.38369	15.2851	12.9982
0.28093	0.40014	14.189	12.4827
0.14637	0.44253	12.7045	10.8293
0.14541	0.47366	11.3582	9.07766
0.2339	0.47066	10.2441	7.90294
0.21414	0.4475	9.42614	7.55252
0.29013	0.43256	9.01959	7.9025
0.3421	0.43594	8.90157	8.54551
0.25687	0.44546	8.97047	9.12537
0.22318	0.44846	9.14652	9.51304
0.11924	0.44735	9.28434	9.74635
0.16189	0.45254	9.25233	9.8908
0.13577	0.46771	9.10131	9.97598
0.11249	0.48732	8.99414	10.0084
0.21486	0.5043	8.99567	9.99171
0.2465	0.51382	9.03041	9.9325
0.34668	0.5116	8.9288	9.83483
0.14332	0.49452	8.68042	9.69752
0.15689	0.46343	8.24791	9.51105
0.16076	0.42434	7.72567	9.2605
0.0936	0.38771	7.26355	8.94246
0.08759	0.36442	6.80347	8.54865
0.29527	0.35972	6.22639	8.04589
0.23062	0.3715	5.39892	7.42395
0.06478	0.39375	4.35637	6.75113
0.12244	0.42039	3.47598	6.17805
0.10194	0.4464	3.19558	5.91503
0.14894	0.46581	3.77632	6.26024
0.12547	0.46938	5.36507	7.55822
0.21209	0.45167	7.97726	9.82715
0.23287	0.42472	10.8406	12.5169
0.18019	0.4148	12.8598	14.8167
0.0969	0.4376	14.2437	16.1353
0.08189	0.47411	16.3513	16.3182
0.1775	0.4601	17.6581	15.8257
0.71774	0.35654	17.2159	15.4167
2.20944	0.72055	15.7218	14.6624
4.41114	1.86188	13.2737	12.4269
6.58006	3.46508	10.11	8.90149
8.3537	5.25509	7.02574	5.38215
10.004	7.06505	4.3369	2.82284
11.7328	8.77082	2.26893	1.3708
13.4307	10.2107	0.88386	0.82335
14.8723	11.3301	0.82391	0.85418
16.0284	12.2462	1.42672	1.01319
16.8996	13.0959	1.92093	1.06588
17.284	13.8553	1.95136	0.99312
16.9443	14.3275	1.48941	0.89199
15.6961	14.2818	1.12662	0.86639
13.7442	13.4985	0.95329	0.88917
11.5701	11.8232	0.52608	0.86499
9.08679	9.33213	0.33988	0.77338
6.78898	6.25331	0.36115	0.65717
7.08196	3.09055	0.42017	0.56311
9.18651	3.35709	0.54874	0.50741
10.7348	6.65247	0.50206	0.48264
11.246	9.30177	0.43436	0.48779
10.951	10.4924	0.42093	0.52075
10.4432	10.285	0.43952	0.56627
10.0648	9.37543	0.49349	0.60979
9.84017	8.6047	0.39747	0.6477
9.84154	8.38923	0.16172	0.68665
9.95062	8.63356	0.12797	0.73213
10.0838	9.07503	0.25392	0.78465
10.2859	9.54628	0.31657	0.84364
10.4773	9.98415	0.36362	0.90313
10.7715	10.3879	0.38279	0.94935
11.2835	10.7676	0.38547	0.96705
11.7278	11.0995	0.38744	0.95079
11.9685	11.3425	0.33225	0.91069
12.0819	11.4731	0.21514	0.86438
12.0619	11.4978	0.10281	0.82466
11.887	11.4451	0.11751	0.79514
11.7149	11.3378	0.05628	0.77322
11.6559	11.1663	0.11796	0.75513
11.2924	10.8735	0.15947	0.73894
10.4087	10.3799	0.11439	0.72589
9.26755	9.65389	0.27909	0.72107
8.02967	8.75655	0.4361	0.72868
6.65395	7.8134	0.27039	0.74507
5.04415	6.93254	0.15477	0.7613
3.53781	6.207	0.1658	0.77324
2.99083	5.84043	0.31805	0.78551
3.88712	6.1243	0.44659	0.80405
5.74401	7.32405	0.44648	0.82863
8.88927	9.57206	0.55175	0.86211
12.8337	12.6232	0.66379	0.9374
15.6524	15.7617	1.02637	1.12718
17.2667	18.0877	1.88826	1.49216
19.2271	19.0177	3.10646	2.03842
20.6786	18.5113	4.45586	2.78082
20.0564	17.1248	6.0978	3.79444
17.735	15.7565	8.21374	5.14414
14.5794	14.2929	10.8214	6.88201
11.2833	11.7362	13.6301	9.08749
8.11677	8.17163	16.2588	11.6688
5.28874	4.76266	18.3249	14.2381
3.12911	2.4024	19.7647	16.3348
1.56918	1.26003	20.5711	17.6463
0.7607	1.06998	20.4134	18.0448
1.31475	1.26296	19.2708	17.4937
1.78777	1.45913	17.3349	15.9773
1.95226	1.484	14.8634	13.5512
1.82151	1.29832	12.1934	10.2964
1.47437	0.95286	10.2507	6.68583
1.058	0.55928	11.7244	5.99542
0.59815	0.2775	15.5483	10.1393
0.19842	0.27247	18.5065	14.5868
0.16468	0.37058	19.413	16.9665
0.22529	0.43093	18.4996	16.7349
0.1898	0.45831	16.5643	14.6979
0.38143	0.47229	14.5044	12.1081
0.40865	0.47698	12.8768	9.8356
0.29844	0.47387	11.6937	8.43448
0.30674	0.46964	10.8336	8.12987
0.38166	0.47391	10.2092	8.49134
0.44001	0.49644	9.65865	8.92261
0.38923	0.53759	9.3029	9.1857
0.18728	0.5843	9.32544	9.35682
0.25967	0.6216	9.56975	9.54443
0.279	0.64487	9.78565	9.74062
0.19735	0.65943	9.85575	9.8884
0.21983	0.66998	9.90279	9.95212
0.2295	0.67259	9.96999	9.90819
0.33952	0.65637	9.94422	9.73244
0.23334	0.61347	9.6383	9.42498
0.25025	0.54875	8.94267	9.00164
0.17262	0.47779	7.87147	8.46596
0.07275	0.41737	6.51376	7.83293
0.10944	0.37906	5.06054	7.12945
0.23456	0.36819	3.84247	6.42249
0.24317	0.38348	3.7135	5.98322
0.17316	0.41582	4.87364	6.27215
0.15622	0.45419	6.89069	7.53483
0.13903	0.49064	9.53332	9.77423
0.15038	0.51937	13.1057	13.0736
0.09224	0.53776	16.8032	17.3189
0.05459	0.54608	18.9864	21.731
0.07953	0.54144	19.9812	24.8771
0.38488	0.51362	20.4832	25.2881
1.0338	0.50314	19.2998	22.5862
2.3106	0.81103	16.7848	18.0213
4.25346	1.7459	13.7239	13.2512
6.36366	3.29667	10.5218	9.10204
8.16842	5.15782	7.57688	5.90455
9.61034	6.84559	5.12622	3.69875
10.6947	8.08913	3.057	2.27981
11.6029	8.93616	1.46834	1.44114
12.6154	9.55837	0.90011	0.96807
13.7145	10.1265	1.48659	0.85886
14.7319	10.7744	1.8463	1.01111
15.5339	11.5616	1.75187	1.10008
15.9532	12.4038	1.33876	1.04156
15.6914	13.0596	0.93741	0.92454
14.6539	13.223	0.67616	0.88479
13.0012	12.5722	0.60835	0.93085
11.2422	10.8566	0.55271	0.95304
9.62159	8.11648	0.33379	0.89278
7.96025	4.84665	0.23945	0.76034
7.66615	2.76401	0.19458	0.60801
9.90959	4.73474	0.25021	0.50085
12.218	7.93444	0.45889	0.46514
13.1207	10.7231	0.60364	0.47726
12.7785	12.2678	0.59789	0.51171
11.8081	12.2433	0.60042	0.5549
10.799	11.1253	0.5368	0.59159
10.0637	9.73688	0.46364	0.61627
9.55899	8.6828	0.51497	0.64016
9.19441	8.20407	0.48749	0.67023
8.97346	8.25431	0.16914	0.70402
8.94231	8.63302	0.27925	0.74326
9.10465	9.12901	0.22813	0.7902
9.4579	9.61239	0.37588	0.83493
9.92816	10.0312	0.43105	0.85974
10.4101	10.3769	0.41875	0.85869
10.865	10.6568	0.34873	0.84185
11.1075	10.8696	0.2463	0.82182
11.1472	11.0064	0.2297	0.80611
11.234	11.0548	0.27822	0.79723
11.3674	11.0057	0.26441	0.79291
11.2825	10.8653	0.11061	0.78828
10.8472	10.6299	0.11883	0.78061
10.1482	10.2617	0.12969	0.77211
9.27859	9.71762	0.12395	0.76692
8.20784	8.99624	0.15612	0.76558
6.82595	8.14728	0.13252	0.76363
4.9739	7.2353	0.14997	0.7568
3.2794	6.40305	0.26051	0.74734
3.07699	6.06219	0.36121	0.74196
4.19215	6.65987	0.20272	0.74267
6.01711	8.13809	0.32564	0.74256
8.8972	10.2343	0.41241	0.73535
12.7484	12.8031	0.24808	0.72918
15.4955	15.4901	0.20971	0.73754
16.6592	17.5888	0.27907	0.753
18.3674	18.4146	0.605	0.77734
20.0474	17.6875	1.51053	0.99508
19.691	16.0151	3.35682	1.77935
17.5727	14.7921	6.17693	3.32347
14.6892	13.9119	9.41228	5.63586
11.5178	11.7603	12.4629	8.38529
8.16359	8.1624	14.965	11.0034
5.10263	4.43581	16.8649	13.1363
2.75735	1.84506	18.1984	14.7052
1.05484	1.06299	18.8616	15.6765
0.63548	1.19782	18.7694	16.035
1.37229	1.26569	17.9178	15.7799
1.73692	1.30585	16.4484	14.8558
1.75177	1.29294	14.5757	13.2006
1.50864	1.16121	12.5037	10.8652
1.07877	0.91416	10.424	8.08078
0.63127	0.6339	8.82524	5.27164
0.47271	0.43553	9.60081	4.10466
0.39663	0.36688	12.6043	6.63769
0.17886	0.37303	15.2797	10.1791
0.16655	0.39711	16.4789	12.8179
0.20635	0.42117	16.1512	13.8097
0.26502	0.43949	14.8233	13.1247
0.296	0.44672	13.1983	11.4236
0.24015	0.44764	11.6962	9.63239
0.20475	0.45153	10.3725	8.40513
0.29569	0.46071	9.29541	7.97611
0.35978	0.47297	8.6758	8.16518
0.24436	0.48955	8.51149	8.58615
0.04085	0.51508	8.61974	8.98222
0.17987	0.54943	8.87131	9.30259
0.19952	0.5886	9.1566	9.59651
0.28684	0.63137	9.3213	9.88064
0.33728	0.67551	9.48474	10.1141
0.20156	0.70822	9.74176	10.2566
0.12222	0.70782	9.95201	10.299
0.47948	0.66174	10.0551	10.253
0.59591	0.58109	9.90767	10.1336
0.19476	0.49356	9.54895	9.95638
0.73627	0.42447	9.11803	9.7234
0.6482	0.38536	8.58274	9.41184
0.07803	0.37447	7.92086	8.99276
0.35466	0.38385	7.02557	8.429
0.31185	0.40565	5.89924	7.6803
0.17512	0.43504	4.71307	6.79254
0.17383	0.47033	3.68535	5.98178
0.16565	0.50877	3.27351	5.66317
0.07883	0.54017	4.75955	6.44733
0.14407	0.55042	8.34147	8.90055
0.06936	0.53932	12.6959	13.0498
0.20501	0.53285	16.1179	18.0849
0.05937	0.55727	18.801	22.3742
0.106	0.58037	21.0827	24.138
0.3275	0.50506	21.1803	22.7647
1.11517	0.43867	19.2526	19.2571
2.81765	1.20073	16.1972	14.9117
5.14322	2.67338	12.6677	10.4843
7.18348	4.46448	9.14207	6.6607
8.69248	6.16199	5.94187	3.87167
9.92622	7.54549	3.33185	2.15258
11.0703	8.61873	1.4361	1.3711
12.2878	9.46104	0.89641	1.05792
13.5367	10.1911	1.22753	0.94839
14.6445	10.9487	1.64192	1.00405
15.5785	11.8174	1.75537	1.02216
16.1537	12.7228	1.47712	0.93126
16.0753	13.4098	1.14596	0.82535
15.1514	13.5834	0.89632	0.82748
13.4212	12.9913	0.68958	0.90173
11.3646	11.4556	0.56083	0.92915
8.97426	9.0291	0.50473	0.86805
6.39894	5.95228	0.29571	0.73937
6.37785	2.7525	0.38734	0.59618
8.59385	3.1384	0.65971	0.49719
10.1648	6.32942	0.62166	0.4665
10.5496	8.74521	0.57526	0.48751
10.1167	9.75262	0.52208	0.53418
9.4358	9.48878	0.46563	0.58556
8.87377	8.63071	0.47018	0.6249
8.63876	7.9401	0.35401	0.65095
8.8147	7.77128	0.18787	0.67732
9.09634	8.04424	0.05383	0.70914
9.22255	8.53699	0.12186	0.74315
9.32671	9.08096	0.04071	0.78367
9.63742	9.57551	0.19532	0.83518
10.1677	9.99268	0.23518	0.88704
10.6998	10.3497	0.31466	0.91952
11.0713	10.6444	0.40467	0.92557
11.3313	10.8482	0.40409	0.91459
11.4756	10.9355	0.35244	0.89709
11.4357	10.9046	0.2278	0.8765
11.4163	10.7835	0.11153	0.85229
11.3983	10.6154	0.15211	0.82509
11.2271	10.4384	0.23373	0.79752
10.9414	10.2655	0.17698	0.77264
10.4722	10.0744	0.09836	0.75465
9.78513	9.81897	0.17208	0.74805
8.86894	9.42764	0.19891	0.75305
[truncated: 100,002 more rows]

## Sheet: Participant 1
Resultant linear accelerations
Left shoe		Right shoe
Motion capture system	Shoe-type IMU	Motion capture system	Shoe-type IMU
1.00241	0.32562	9.82832	9.77093
0.43975	0.33373	8.60791	9.17267
0.15025	0.36198	7.29672	8.61788
0.13438	0.40026	6.127	8.09075
0.2478	0.43788	5.24311	7.62211
0.26949	0.46516	4.74826	7.30093
0.25895	0.47893	5.04127	7.40947
0.23324	0.48348	6.5066	8.4609
0.23324	0.48431	9.32845	10.6619
0.27869	0.48391	12.6375	13.5082
0.21494	0.48406	15.0907	16.1818
0.11622	0.49394	16.04	17.9345
0.2045	0.53421	17.2117	18.1802
0.16447	0.60782	19.2333	17.0351
0.38333	0.64415	19.4946	15.703
0.94252	0.55046	17.9915	14.6068
2.12777	0.82178	15.3034	12.643
4.4332	2.12944	11.9325	9.56328
7.27122	4.17112	8.54506	6.30903
9.80613	6.52426	5.46055	3.66747
12.0619	8.71389	3.16891	1.84614
14.1033	10.5072	1.55429	0.8491
15.5382	11.9044	0.72393	0.70683
16.4451	12.9372	1.1875	0.90318
17.1304	13.6537	1.51016	0.98631
17.3922	14.1156	1.6108	0.92977
16.9585	14.3265	1.41359	0.84752
15.8545	14.1967	1.04975	0.85176
14.1588	13.5053	0.95732	0.90855
12.2312	11.9832	0.75871	0.91433
10.1012	9.54847	0.40932	0.83273
7.48337	6.43187	0.13991	0.69147
6.20148	3.20116	0.27922	0.55057
8.03514	2.14429	0.44238	0.4672
10.1445	4.7286	0.4165	0.45294
10.895	7.22469	0.44477	0.47997
10.3903	8.56242	0.35016	0.51766
9.35216	8.67607	0.2928	0.54927
8.46976	8.1832	0.33635	0.57269
7.93938	7.68077	0.50074	0.59245
7.77353	7.4242	0.4993	0.61142
7.88308	7.4812	0.21878	0.62462
8.02238	7.85766	0.28558	0.62933
8.17364	8.46909	0.3438	0.63939
8.444	9.13071	0.37751	0.6729
8.91186	9.68506	0.3315	0.7271
9.53371	10.1002	0.17055	0.77844
10.228	10.4306	0.22075	0.8082
10.7805	10.7243	0.32297	0.81612
11.0091	10.9776	0.28621	0.81098
11.1195	11.1618	0.1939	0.79861
11.2449	11.2606	0.0584	0.77917
11.3558	11.2799	0.14093	0.75202
11.449	11.2409	0.17746	0.72152
11.3988	11.164	0.148	0.6952
11.1005	11.0541	0.08291	0.678
10.6737	10.8959	0.09644	0.67164
10.2006	10.6662	0.11628	0.67612
9.66079	10.3574	0.06622	0.68844
9.00814	9.96087	0.0988	0.70234
8.13439	9.44793	0.22004	0.71304
7.1244	8.81483	0.29311	0.72105
6.03727	8.11713	0.26512	0.72906
4.91826	7.44582	0.49143	0.73723
4.1439	6.91942	0.27333	0.74199
4.29243	6.8058	0.11585	0.73741
5.39386	7.56464	0.06975	0.71713
7.73397	9.34041	0.13375	0.67946
11.0567	11.7049	0.21575	0.63636
13.5446	14.1302	0.26267	0.61302
13.9216	16.1784	0.37339	0.6252
15.1061	17.181	0.81089	0.66144
19.2065	16.3422	1.80536	0.80935
21.6432	13.9854	3.6611	1.51555
21.0448	12.2094	6.20638	3.11265
18.4805	11.8493	9.12138	5.52527
15.0448	11.1453	12.246	8.36556
11.3451	9.242	15.204	11.1467
7.84599	6.52057	17.6877	13.6188
4.96139	3.71227	19.5916	15.6939
2.75933	1.57189	20.6992	17.2123
1.03214	0.81964	20.7991	17.9946
0.99399	1.15082	19.9215	17.905
1.85006	1.4031	18.295	16.825
2.0786	1.49083	16.0715	14.7189
1.89643	1.39309	13.5118	11.7425
1.54019	1.11789	10.8661	8.32902
1.068	0.76766	9.26543	5.40444
0.66375	0.4684	11.0498	5.40132
0.40101	0.34822	14.393	8.44483
0.23635	0.3775	16.7511	11.4847
0.11563	0.39117	17.3941	13.2208
0.23569	0.37382	16.6688	13.4895
0.27958	0.37353	15.2809	12.5287
0.29219	0.40533	13.8281	10.8942
0.26197	0.44214	12.6276	9.38599
0.19765	0.46088	11.6567	8.60755
0.18943	0.47187	10.8664	8.64403
0.32867	0.50012	10.3175	9.10249
0.41358	0.54702	10.0048	9.54646
0.33389	0.58518	9.87306	9.80097
0.22888	0.59517	9.92405	9.90782
0.23201	0.58737	10.0011	9.99385
0.12814	0.58409	9.96834	10.1299
0.08542	0.59191	9.93953	10.2768
0.18904	0.59842	9.96095	10.3542
0.36718	0.59093	9.94544	10.316
0.38043	0.56902	9.75059	10.1637
0.26502	0.5395	9.25949	9.90166
0.52581	0.50683	8.52978	9.51377
0.36371	0.47183	7.72778	9.00609
0.32302	0.43536	6.82294	8.43169
0.30198	0.40049	5.81582	7.84734
0.11498	0.37188	4.85579	7.25826
0.23988	0.35384	4.00361	6.66727
0.28976	0.3506	3.5332	6.22197
0.2773	0.36476	4.05653	6.22476
0.18788	0.3925	5.29794	6.95442
0.13778	0.42443	7.41946	8.61287
0.10935	0.45229	10.7585	11.3604
0.10986	0.4726	14.4005	15.0394
0.1296	0.49064	16.9173	18.8961
0.16849	0.52146	18.2337	21.6991
0.28725	0.56305	19.069	22.2515
0.78934	0.57747	18.863	20.2748
2.10383	0.657	17.2259	16.7689
4.18675	1.34335	14.5845	12.9349
6.45209	2.86779	11.6396	9.33115
8.45484	4.94978	8.66575	6.29005
10.1044	7.09279	5.89175	3.95528
11.5718	8.86821	3.48119	2.27143
13.0737	10.1421	1.6498	1.20947
14.5551	11.0865	0.66438	0.73026
15.9033	11.9914	0.89494	0.78728
16.9959	13.0029	1.42921	1.00021
17.6714	14.0259	1.61866	1.07689
17.831	14.8445	1.44358	0.99166
17.3159	15.2831	1.08659	0.83766
15.9266	15.1856	0.85472	0.75055
14.033	14.2627	0.77318	0.75798
12.0448	12.1842	0.64864	0.76113
9.42416	8.91996	0.50285	0.70899
7.32687	5.01189	0.29922	0.61944
8.9054	2.74781	0.24247	0.54241
11.5769	5.24875	0.61835	0.516
12.9353	8.29051	0.70047	0.53102
13.0379	10.3258	0.57425	0.5591
12.3778	10.8529	0.47627	0.58449
11.4079	10.1264	0.53182	0.60278
10.5225	9.05212	0.48688	0.61104
9.95463	8.36281	0.482	0.61411
9.68448	8.24539	0.33881	0.62946
9.61371	8.55116	0.09956	0.66658
9.72251	9.03545	0.20141	0.71865
9.83325	9.51174	0.33254	0.77947
9.99432	9.9205	0.35265	0.84616
10.4047	10.2886	0.3966	0.90658
11.0116	10.6534	0.3983	0.94142
11.6426	11.033	0.42225	0.94342
11.9954	11.4017	0.37125	0.92149
12.0518	11.6884	0.26981	0.88644
11.9446	11.8289	0.21097	0.844
11.7218	11.7955	0.21779	0.79845
11.4594	11.5902	0.11357	0.75629
11.1933	11.247	0.13535	0.72475
10.7487	10.8216	0.22628	0.70749
10.0141	10.3652	0.14097	0.70488
9.05652	9.89039	0.24478	0.71607
7.89895	9.37079	0.39658	0.73638
6.76345	8.79295	0.25827	0.75422
5.75324	8.16236	0.03919	0.75783
4.9255	7.51532	0.06302	0.74762
4.581	7.05435	0.14322	0.73571
5.24604	7.17465	0.22745	0.7324
6.96432	8.1651	0.20258	0.73847
9.79748	10.0339	0.03767	0.74903
13.3772	12.6682	0.17236	0.76108
15.9624	15.7029	0.1769	0.77795
16.7492	18.3489	0.41819	0.80652
17.825	19.6123	1.00641	0.8536
20.3575	18.7757	1.66951	0.97273
21.1333	16.2753	2.62587	1.39062
19.585	13.8723	4.28014	2.37309
16.6808	12.216	6.462	3.91354
13.1733	10.2007	8.77677	5.76704
9.70962	7.58177	11.0825	7.65112
6.63189	4.96037	13.0423	9.45453
4.08753	2.92067	14.6019	11.16
2.24863	1.81891	16.0828	12.6764
1.03009	1.35896	17.2988	13.8786
0.72072	1.06511	17.8977	14.6803
1.44086	1.06617	17.8449	15.0117
2.08144	1.33939	17.1224	14.7605
2.09961	1.50954	15.6986	13.8047
1.67996	1.40249	13.7202	12.1474
1.1215	1.06214	11.4926	9.88552
0.61774	0.63671	9.4502	7.24944
0.41818	0.31448	9.6445	5.33262
0.26638	0.28891	13.0833	6.21616
0.16427	0.36437	16.6183	9.24088
0.24857	0.39537	18.4899	12.3629
0.41057	0.40631	18.4117	14.2269
0.4632	0.4201	16.9207	14.3642
0.3852	0.43381	14.9281	13.1048
0.25082	0.43671	13.0288	11.0436
0.21697	0.42738	11.4392	9.00866
0.26402	0.41412	10.2339	7.89334
0.43738	0.41111	9.42035	7.84083
0.45342	0.42857	8.9435	8.21741
0.24625	0.45857	8.79741	8.54984
0.15285	0.49062	8.88209	8.81733
0.20167	0.52957	9.03794	9.13084
0.27042	0.58102	9.21575	9.4765
0.34821	0.63142	9.42024	9.74546
0.34822	0.65583	9.61889	9.85258
0.32467	0.64421	9.66079	9.77024
0.34746	0.60601	9.36722	9.5141
0.3631	0.55299	8.69522	9.14655
0.21301	0.49249	7.82644	8.74237
0.06635	0.43113	6.96977	8.34429
0.03184	0.3751	6.18162	7.97672
0.18561	0.32871	5.44438	7.64056
0.14229	0.29647	4.65306	7.32789
0.13712	0.28601	4.15449	7.11437
0.22853	0.30299	4.51338	7.17366
0.19791	0.34412	5.63519	7.67731
0.18135	0.39714	7.26337	8.75385
0.10407	0.44559	9.33244	10.5276
0.16011	0.47709	11.7773	12.9749
0.15835	0.48943	13.9571	15.6732
0.17721	0.49325	15.093	17.7929
0.13587	0.50993	15.5042	18.477
0.17099	0.55124	16.3273	17.5358
0.26861	0.58221	16.361	15.6893
0.56572	0.52318	15.0793	13.7082
1.42705	0.43121	12.954	11.727
3.37466	0.92969	10.4304	9.51866
6.20555	2.17821	7.79146	6.90506
8.87058	4.12488	5.22389	4.19894
11.0499	6.57585	2.99765	2.10391
13.0549	9.0731	1.4705	1.0807
14.8922	11.1886	0.64146	0.86739
16.4499	12.7607	0.71855	0.83694
17.6102	13.8887	1.00561	0.82571
18.2163	14.7392	1.35268	0.80388
18.1371	15.3467	1.55415	0.7456
17.2296	15.5442	1.26078	0.70625
15.4337	14.9602	0.8567	0.75197
13.0203	13.1966	0.67984	0.83795
10.1512	10.1653	0.50175	0.87673
7.21524	6.29491	0.26706	0.83143
6.9062	2.95608	0.13199	0.72619
9.11192	3.90848	0.39314	0.61435
10.7391	6.83171	0.48893	0.53326
11.1296	9.16348	0.48752	0.47949
10.8008	10.2405	0.42633	0.43625
10.2245	9.95653	0.31344	0.40918
9.62116	8.91043	0.32297	0.407
9.14519	7.93351	0.40389	0.42524
8.90985	7.47788	0.39861	0.46282
8.95697	7.57619	0.30894	0.51411
9.163	8.09271	0.11076	0.56771
9.47077	8.84185	0.19064	0.62016
9.91193	9.62565	0.30646	0.67247
10.4653	10.3036	0.32017	0.71806
11.0878	10.8346	0.27468	0.74449
11.6643	11.2499	0.14974	0.74805
12.1512	11.5797	0.20387	0.73684
12.4394	11.8123	0.23451	0.71967
12.4462	11.9288	0.18367	0.70059
12.3225	11.9291	0.20257	0.68158
12.1391	11.8188	0.12389	0.66564
11.8268	11.602	0.01704	0.65633
11.337	11.2648	0.09493	0.6551
10.5968	10.7673	0.12294	0.65994
9.66996	10.0905	0.18476	0.66639
8.59047	9.2814	0.39238	0.67029
7.20628	8.4326	0.31752	0.66985
5.74798	7.60635	0.10046	0.66552
4.57357	6.82564	0.16837	0.65957
3.64311	6.21976	0.10971	0.65575
3.43713	6.08665	0.08487	0.65836
4.49579	6.67013	0.11781	0.67086
6.62546	8.00417	0.03924	0.69247
9.9052	10.0443	0.12411	0.71623
13.4975	12.6004	0.06737	0.73435
15.9856	15.2372	0.35128	0.75061
17.7671	17.3839	0.89561	0.81194
19.8798	18.4075	1.64488	1.06675
20.8482	18.172	2.85689	1.68829
19.6158	17.4655	4.75318	2.7709
16.8931	16.4408	7.06307	4.36051
13.7368	14.122	9.5103	6.3243
10.4464	10.4216	12.019	8.39507
7.32672	6.44912	14.2996	10.4218
4.65684	3.33521	16.2019	12.3306
2.43459	1.61623	17.607	13.9639
1.09749	1.10379	18.4017	15.1489
1.08409	1.04878	18.5738	15.7778
1.63303	1.1976	18.0341	15.7797
1.9001	1.42456	16.7917	15.0767
1.88153	1.51487	14.981	13.6084
1.64869	1.37344	12.8695	11.4123
1.19245	1.05696	10.6982	8.58204
0.7976	0.68744	9.44563	5.63947
0.54324	0.37377	11.1685	5.55709
0.32683	0.25728	14.6853	9.3228
0.15325	0.3297	17.4026	13.2518
0.28532	0.38858	18.3545	15.465
0.41007	0.41144	17.7346	15.4976
0.37386	0.42378	16.2724	13.9787
0.33362	0.43374	14.6111	11.891
0.23655	0.43572	13.066	9.93293
0.16575	0.43032	11.8201	8.6094
0.24597	0.43145	10.9388	8.21648
0.32344	0.45493	10.3453	8.47909
0.2248	0.50168	10.0282	8.8588
0.18491	0.55376	9.9645	9.08908
0.32833	0.59761	9.96522	9.22155
0.38257	0.63667	9.99278	9.36993
0.32519	0.67549	10.0421	9.52368
0.20208	0.70376	10.0602	9.57745
0.21917	0.69992	9.99442	9.44095
0.31294	0.65056	9.69221	9.09691
0.2183	0.56554	9.12051	8.59436
0.25395	0.47123	8.31488	8.02137
0.1573	0.39207	7.30039	7.44921
0.11304	0.34057	6.05385	6.89822
0.28305	0.31822	4.85879	6.37803
0.34576	0.32116	3.92651	5.89696
0.30441	0.34352	3.08782	5.50953
0.16803	0.37776	3.32825	5.50974
0.18362	0.41698	5.17439	6.37937
0.25015	0.45587	7.98499	8.29858
0.13954	0.48668	11.527	11.1837
0.13868	0.50133	15.6024	15.0016
0.18158	0.50711	19.2243	19.4338
0.07689	0.53292	21.0953	23.5389
0.34252	0.58485	21.1728	25.9656
0.62676	0.59486	19.8557	25.478
1.48409	0.56784	17.0673	21.8168
3.14897	1.10747	13.7673	16.2886
5.13464	2.47871	10.8058	10.8541
7.00217	4.36642	8.20857	6.69105
8.64559	6.33038	6.0306	4.03853
10.1233	7.94275	3.91962	2.52604
11.5913	9.11092	1.82313	1.58179
13.2083	10.1052	0.85411	0.94159
15.0098	11.2399	1.15589	0.65523
16.8704	12.6056	1.61322	0.77511
18.4375	14.1043	1.71743	0.93796
19.3351	15.592	1.48568	0.95476
19.2715	16.7886	1.32249	0.86938
17.9783	17.1836	1.0994	0.78235
15.7888	16.2942	0.75903	0.75009
13.2526	13.9645	0.53949	0.73279
10.0051	10.4248	0.4484	0.67806
6.57786	6.23615	0.30493	0.59622
6.57541	2.25967	0.19259	0.52285
9.07132	3.16524	0.40704	0.48221
10.6763	6.6237	0.55215	0.4806
11.0375	9.01383	0.6182	0.51084
10.7022	9.94114	0.62009	0.55475
10.2006	9.78431	0.44668	0.59268
9.9355	9.15574	0.48171	0.61687
10.046	8.59751	0.51171	0.63081
10.3742	8.47659	0.36353	0.64695
10.7334	8.88657	0.23649	0.67937
11.0181	9.65656	0.22102	0.72653
11.2298	10.4856	0.22433	0.77408
11.4419	11.1431	0.31737	0.81247
11.5781	11.5537	0.41394	0.83982
11.7175	11.7512	0.37273	0.85413
11.9764	11.8121	0.31691	0.85197
12.2045	11.8013	0.26874	0.83613
12.3491	11.7579	0.19116	0.81619
12.3569	11.7022	0.14385	0.79911
12.2258	11.635	0.13769	0.78497
12.1494	11.5436	0.13438	0.77114
12.0278	11.416	0.16336	0.75694
11.5966	11.2455	0.15181	0.74436
11.0528	11.0115	0.0734	0.73573
10.5792	10.6709	0.10346	0.73217
9.80335	10.1795	0.15505	0.73291
8.64014	9.48389	0.29015	0.73593
7.23425	8.53307	0.29492	0.73968
5.49712	7.40367	0.14427	0.74424
3.69505	6.37976	0.18587	0.75211
2.87184	5.82003	0.24866	0.76708
3.60113	5.92295	0.15905	0.78932
5.24071	6.77873	0.13173	0.81066
7.20355	8.51207	0.12885	0.81823
10.0551	11.0714	0.15995	0.80589
14.0095	14.0844	0.15565	0.77989
16.8213	16.9841	0.26263	0.75567
17.474	19.0703	0.47543	0.7584
18.3736	19.4831	0.83161	0.84717
20.528	17.9927	1.65821	1.13994
20.8808	16.0047	3.12936	1.78091
18.8881	14.7617	5.06056	2.87951
15.7521	13.3889	7.26291	4.39438
12.2944	11.1134	9.62332	6.185
8.84883	8.27864	11.8838	8.17077
5.83845	5.41049	13.9498	10.2349
3.55669	2.95258	15.7335	12.123
1.97063	1.38575	17.0934	13.6061
0.87261	0.96834	17.9625	14.6114
1.00249	1.04265	18.1928	15.1656
1.24679	1.1406	17.7169	15.2594
1.44919	1.22818	16.6695	14.7957
2.08666	1.20837	15.1206	13.6565
2.13957	1.02846	13.1175	11.6753
1.40401	0.75244	10.9671	8.71621
0.79694	0.47857	9.52991	5.54139
0.6191	0.31413	10.8196	5.87265
0.42752	0.31096	14.2898	9.75125
0.1484	0.34934	17.3466	13.2689
0.36812	0.37477	18.6453	15.2547
0.44639	0.40261	18.0998	15.7568
0.44025	0.43506	16.4843	14.9452
0.25542	0.45344	14.5687	12.9877
0.19723	0.44681	12.7333	10.5137
0.26662	0.43229	11.1982	8.5473
0.43397	0.44503	10.0656	7.75054
0.37609	0.49833	9.34344	7.84001
0.19218	0.56236	9.08733	8.19947
0.24873	0.60815	9.12025	8.58415
0.28606	0.63789	9.1799	8.98861
0.35312	0.66551	9.31054	9.39651
0.43127	0.68956	9.51655	9.73475
0.25251	0.69206	9.71444	9.93771
0.20205	0.66118	9.92053	9.98442
0.36238	0.60689	9.90862	9.87798
0.39148	0.54959	9.46573	9.63856
0.19991	0.501	8.73324	9.2863
0.13807	0.46314	7.85316	8.82965
0.08558	0.43627	6.88963	8.30146
0.17687	0.42042	5.80794	7.75685
0.16659	0.41446	4.7992	7.27107
0.11125	0.41835	4.11929	7.00879
0.14826	0.43425	4.04147	7.16273
0.10308	0.46097	5.04353	7.78819
0.24223	0.4885	6.7583	8.88882
0.20733	0.50305	8.98265	10.6082
0.15096	0.4994	11.8382	13.0774
0.21002	0.48676	14.3297	15.9991
0.29809	0.48214	15.4544	18.4395
0.42016	0.50126	15.733	19.2185
0.31672	0.55373	16.6917	17.8439
0.33014	0.61626	17.1621	15.0965
0.85512	0.59986	16.0205	12.4156
2.1388	0.60751	13.8697	10.5718
4.49551	1.4891	11.4365	9.03115
7.10151	3.29558	8.71705	6.98826
9.26146	5.65753	5.81129	4.56338
11.1592	8.07537	3.46248	2.51822
12.9347	10.0723	1.9905	1.31543
14.5757	11.52	1.003	0.83869
16.0115	12.6197	0.80382	0.81268
17.0363	13.5705	1.13932	0.93527
17.4168	14.3686	1.29851	0.98244
17.0316	14.8573	1.15893	0.91127
15.9162	14.8773	1.05154	0.82504
14.1331	14.2941	0.92474	0.8337
11.7793	12.8545	0.70194	0.8929
8.86638	10.2483	0.56226	0.89786
6.19356	6.49899	0.50065	0.81327
6.5481	2.47653	0.20408	0.68398
8.95859	3.27456	0.49068	0.58235
10.6548	6.43196	0.56923	0.53582
11.2183	8.50474	0.43412	0.51817
11.1596	9.38206	0.41611	0.50762
10.8233	9.27723	0.34642	0.51096
10.4217	8.64666	0.30223	0.53499
10.1326	8.09774	0.36774	0.57332
10.0179	8.0294	0.29188	0.61787
10.1275	8.45325	0.14748	0.65841
10.3233	9.11038	0.15761	0.68873
10.4763	9.73325	0.17825	0.71466
10.6977	10.2105	0.16562	0.74612
10.9617	10.5619	0.29005	0.78563
11.2818	10.8406	0.39856	0.82669
11.6994	11.0762	0.33267	0.8612
11.9986	11.276	0.23286	0.88503
12.0288	11.4255	0.23041	0.89683
11.8969	11.4908	0.2309	0.89456
11.7211	11.451	0.19552	0.87591
11.5556	11.2995	0.13322	0.84336
11.3625	11.0179	0.18888	0.80396
10.9492	10.5838	0.22021	0.76391
10.1275	9.99412	0.21868	0.72872
9.02077	9.25804	0.27834	0.70494
7.76618	8.34501	0.21045	0.69743
6.26588	7.195	0.32419	0.70768
4.54188	5.90415	0.27405	0.73318
2.9459	4.91681	0.14445	0.76572
2.78518	4.84628	0.05305	0.79314
4.51782	5.78483	0.07245	0.80609
7.08184	7.45298	0.17296	0.80192
10.5382	9.73644	0.25341	0.78574
14.3505	12.5771	0.31478	0.77259
17.374	15.7803	0.45372	0.79185
19.576	18.7584	1.04669	0.91726
20.664	20.7419	2.00203	1.28917
19.9504	21.2974	3.06518	1.98756
17.5686	20.1224	4.29385	2.94192
14.2165	17.04	5.7508	4.05267
10.8917	12.6717	7.39209	5.29542
7.92211	8.2201	8.96299	6.61386
5.37664	4.61884	10.4211	7.8703
3.38832	2.31179	11.9457	9.01895
1.83773	1.30185	13.3694	10.1339
0.83652	1.02402	14.5878	11.2554
1.27356	0.90606	15.6348	12.322
1.68518	0.88163	16.3859	13.2144
1.79705	0.98214	16.5149	13.8017
1.71899	1.085	16.0135	13.9017
1.53673	1.07447	15.0367	13.2789
1.2712	0.93497	13.1916	11.7515
0.85892	0.70377	10.6541	9.18571
0.5099	0.45202	8.94631	5.83809
0.28192	0.2892	10.8962	5.06167
0.1569	0.29073	15.0351	9.51349
0.2459	0.34933	18.4235	14.3581
0.3881	0.38489	19.9158	17.2169
0.40177	0.39826	19.5004	17.5072
0.39751	0.40117	17.9602	15.9428
0.23235	0.39849	16.0065	13.6064
0.27688	0.39077	14.1491	11.2192
0.44237	0.38369	12.6539	9.35135
0.40283	0.39507	11.4254	8.4768
0.24021	0.42625	10.3627	8.41312
0.14732	0.46156	9.46555	8.52479
0.16202	0.49816	8.7635	8.47076
0.25523	0.53888	8.30814	8.36568
0.23649	0.57583	8.23466	8.42532
0.13416	0.59408	8.46144	8.64337
0.13376	0.585	8.78613	8.85415
0.27187	0.55262	8.98318	8.91099
0.26836	0.5075	8.79625	8.73093
0.17538	0.4601	8.24924	8.29835
0.1978	0.41774	7.40973	7.69172
0.09251	0.38282	6.42528	7.0291
0.22072	0.35602	5.41073	6.39494
0.24555	0.34044	4.26917	5.87942
0.16918	0.33846	3.37231	5.62478
0.17008	0.34639	4.03967	5.95525
0.10881	0.35638	6.27325	7.39967
0.17505	0.36095	9.66302	10.1038
0.21895	0.3574	13.9794	13.6279
0.20733	0.35896	17.7677	17.3645
0.13677	0.40139	19.4832	20.6369
0.18371	0.49959	19.5768	22.4338
0.21623	0.58514	18.858	21.9033
0.53889	0.5461	17.0869	19.4486
1.51574	0.6134	14.3506	16.1378
3.31867	1.53633	11.3408	12.35
5.63647	3.13655	8.35886	8.32382
7.72074	5.0086	5.62909	4.77737
9.43341	6.74181	3.48258	2.34765
10.9726	8.15164	1.85524	1.20419
12.429	9.28256	0.823	0.91306
13.7783	10.2373	1.25748	0.88832
14.9822	11.1437	1.61053	0.95676
15.9606	12.1074	1.64189	0.96266
16.5202	13.097	1.39048	0.85556
16.4853	13.9002	1.01396	0.73179
15.6853	14.1642	0.53679	0.72899
14.0237	13.5547	0.3766	0.81958
11.765	11.921	0.53751	0.87917
9.20896	9.35744	0.62276	0.86094
6.71363	6.24457	0.43477	0.77889
6.22732	3.26232	0.1654	0.67281
7.92144	2.61351	0.48566	0.5851
9.22454	4.82085	0.58321	0.53373
9.53768	6.70053	0.44977	0.51141
9.33628	7.54367	0.33272	0.50681
9.05628	7.57809	0.42645	0.51758
8.92565	7.24748	0.29429	0.54767
9.02681	6.94344	0.30733	0.59953
9.30957	6.95886	0.35678	0.66447
9.7368	7.42781	0.33031	0.72126
10.2459	8.25644	0.30347	0.75809
10.7076	9.18199	0.20883	0.78588
11.0544	9.97652	0.27981	0.82143
11.4312	10.5704	0.36889	0.86545
11.9285	11.0151	0.36407	0.90411
12.439	11.3793	0.28639	0.92783
12.7776	11.6772	0.26713	0.9391
12.8403	11.8773	0.23271	0.9441
12.7502	11.9396	0.20363	0.94512
12.6121	11.8434	0.24549	0.93959
12.4165	11.6039	0.20929	0.92243
12.1043	11.2662	0.1837	0.89029
11.6174	10.8836	0.17893	0.84538
10.8832	10.4805	0.07102	0.79719
9.93876	10.0318	0.12627	0.75788
9.00139	9.48886	0.23319	0.7341
8.07001	8.77666	0.23493	0.72596
6.74749	7.79656	0.24852	0.73165
4.91134	6.57189	0.10665	0.74997
3.28415	5.47659	0.05964	0.77913
3.79937	5.32284	0.0423	0.81352
6.68933	6.74834	0.21698	0.8429
10.652	9.71369	0.12117	0.85724
15.1588	13.9197	0.09852	0.85602
19.2913	18.652	0.19563	0.85109
22.1487	22.663	0.27719	0.84661
23.3036	24.6974	0.58123	0.81836
22.383	24.4448	1.47462	0.86264
19.7324	22.6867	2.92113	1.5232
16.0993	19.968	4.97043	3.02483
12.2985	16.0818	7.19161	5.07826
8.80516	11.3108	9.07245	7.19564
5.8637	6.75001	10.5755	8.86149
3.57637	3.43929	11.8124	9.86591
2.00844	1.86896	12.799	10.3698
0.99249	1.46397	13.6743	10.6829
1.05779	1.22458	14.5318	11.0824
1.85229	1.14779	15.1952	11.7054
2.11809	1.31069	15.5866	12.473
1.81491	1.4362	15.5414	13.1011
1.49	1.34764	14.8731	13.1918
1.15999	1.06083	13.6043	12.4019
0.76567	0.70188	11.8619	10.6141
0.48539	0.45775	10.0878	8.04048
0.22309	0.42129	8.90385	5.40106
0.11168	0.42119	9.86349	4.54918
0.1935	0.38385	13.0905	6.90976
0.33109	0.35779	16.1816	10.4179
0.43472	0.36904	17.9323	13.283
0.39952	0.39494	17.9734	14.6489
0.42719	0.40949	16.5522	14.321
0.42914	0.41002	14.3778	12.5495
0.30425	0.40131	12.1493	10.0855
0.38156	0.38648	10.3794	7.93939
0.30493	0.38661	9.23951	6.82402
0.17807	0.42258	8.53337	6.7875
0.10532	0.48478	8.01009	7.26736
0.25706	0.55256	7.6449	7.74357
0.4017	0.61211	7.48077	8.06437
0.4061	0.65028	7.53085	8.29088
0.29804	0.65404	7.73034	8.51261
0.25407	0.6246	7.82815	8.70343
0.27948	0.57762	7.68467	8.75791
0.15949	0.52699	7.29448	8.62019
0.11717	0.47882	6.75151	8.31962
0.09265	0.43479	6.21526	7.9602
0.09289	0.39516	5.69292	7.66213
0.16654	0.36361	5.27293	7.47936
0.19076	0.34646	4.91934	7.38113
0.02333	0.34527	4.61271	7.30626
0.29173	0.35632	4.40264	7.2142
0.33173	0.3751	4.25107	7.07794
0.11828	0.39635	4.28886	6.87547
0.09876	0.414	4.32848	6.62019
0.15302	0.42484	4.25102	6.39402
0.14577	0.43017	4.70364	6.36618
0.19823	0.43299	5.7027	6.81295
0.13353	0.43532	7.16778	8.08347
0.10522	0.43919	9.31245	10.3384
0.06857	0.45418	11.614	13.227
0.11672	0.50289	13.3363	15.8984
0.06708	0.58869	14.6506	17.422
0.27586	0.63536	15.752	17.444
0.95157	0.5273	15.616	16.2827
2.5508	0.75331	14.3734	14.2923
4.93588	2.09676	12.2899	11.7632
7.41369	4.20247	9.69979	9.06741
9.67027	6.59844	7.15003	6.384
11.7734	8.7635	4.92427	3.92463
13.7374	10.5006	2.93859	2.09762
15.5605	11.962	1.18983	1.09893
17.2396	13.327	0.7263	0.80385
18.58	14.6062	1.19638	0.93069
19.2538	15.6923	1.59951	1.11199
19.109	16.4769	1.63452	1.1591
17.9549	16.794	1.46144	1.04778
15.9269	16.2871	1.28621	0.86861
13.6029	14.5688	1.01003	0.73698
10.7038	11.5615	0.45314	0.67834
7.37016	7.63794	0.44538	0.63598
6.74411	3.6963	0.46639	0.57412
9.08521	2.90273	0.36069	0.51896
11.0228	5.87382	0.4047	0.51102
11.7453	8.54045	0.45995	0.54731
11.7255	9.89147	0.44686	0.59684
11.3143	9.91567	0.40286	0.64129
10.7617	9.29575	0.36552	0.68266
10.375	8.73498	0.2741	0.72489
10.1968	8.60523	0.17978	0.76338
10.2084	8.94244	0.2238	0.79011
10.3657	9.53382	0.19911	0.80409
10.5749	10.1371	0.18957	0.81573
10.9582	10.6486	0.24648	0.8391
11.416	11.0772	0.34594	0.8809
11.772	11.4404	0.41941	0.93317
12.1691	11.7396	0.3702	0.978
12.5546	11.9629	0.30671	1.0016
12.727	12.0831	0.31706	0.99919
12.6322	12.0908	0.27967	0.96963
12.4018	12.0046	0.21377	0.91341
12.1963	11.843	0.13589	0.8364
12.0027	11.6172	0.06104	0.75364
11.7307	11.3392	0.12143	0.68506
11.3549	11.0132	0.15473	0.64566
10.6775	10.6105	0.22067	0.6427
9.5399	10.0778	0.25773	0.67393
8.16541	9.38887	0.29098	0.72472
6.72829	8.53113	0.12035	0.77614
5.26389	7.49202	0.14792	0.81801
3.84504	6.41016	0.23412	0.84983
3.37019	5.72743	0.52359	0.87412
4.8536	6.00602	0.62978	0.89847
7.38082	7.44969	0.73813	0.93757
10.5021	9.97113	1.03012	1.00452
14.0402	13.3437	1.39368	1.10909
16.5735	16.9612	1.65839	1.27583
18.0828	19.8131	2.09293	1.55685
19.9672	20.9049	2.86392	2.00487
21.2621	20.0781	3.83463	2.63657
20.514	18.2061	5.03343	3.4578
17.9409	16.022	6.69745	4.56909
14.4529	13.5637	8.9169	6.18479
11.0464	10.7928	11.5153	8.37765
7.99464	7.77439	14.1292	10.8927
5.40614	4.8811	16.5073	13.3211
3.28748	2.73664	18.5438	15.3648
1.61479	1.55821	19.951	16.9358
0.84772	0.99932	20.4175	17.9709
1.28269	0.97788	19.9441	18.2248
1.71949	1.34466	18.5444	17.3811
1.9567	1.59145	16.158	15.2773
1.82888	1.50496	13.3587	12.0418
1.42496	1.13737	10.7196	8.24109
1.00896	0.66678	10.193	5.37882
0.68864	0.31844	13.496	6.69893
0.43533	0.32222	17.251	10.7514
0.22807	0.41888	19.2763	14.2576
0.17213	0.45311	19.2341	15.9512
0.22997	0.45188	17.6971	15.6275
0.26712	0.44742	15.6131	13.6671
0.33845	0.44588	13.8246	11.0811
0.31425	0.43696	12.6186	9.24965
0.29732	0.42452	11.7801	8.84487
0.43892	0.43161	11.1462	9.22055
0.51925	0.48228	10.6712	9.57902
0.40585	0.57149	10.3937	9.73672
0.25168	0.66091	10.3125	9.80091
0.23599	0.71772	10.3442	9.86862
0.29014	0.73446	10.4047	9.98845
0.33035	0.71759	10.4996	10.1326
0.32223	0.67638	10.5818	10.2123
0.27482	0.62104	10.511	10.1431
0.18074	0.56483	10.1732	9.8753
0.22021	0.52092	9.49009	9.41349
0.16701	0.49388	8.60179	8.8213
0.14211	0.47887	7.50156	8.18608
0.17693	0.46857	6.19896	7.55282
0.13155	0.45899	4.95521	6.95082
0.10807	0.44998	4.01488	6.56827
0.22251	0.44206	4.09096	6.78659
0.29452	0.43472	5.63541	7.85092
0.30308	0.42672	8.08859	9.72708
0.21128	0.4164	11.4109	12.3641
0.1849	0.40299	15.4071	15.6101
0.14568	0.39332	18.5802	19.0229
0.11341	0.40626	19.7427	21.8749
0.24896	0.43852	20.0412	23.1327
0.48213	0.43117	20.1888	22.1613
1.14612	0.47623	18.8037	19.7308
2.7321	1.13252	16.0607	16.8979
5.31934	2.46411	12.7151	13.5179
8.29503	4.3826	9.50662	9.50398
11.0667	6.80924	6.72497	5.65147
13.4477	9.41445	4.28498	2.80868
15.5342	11.6821	2.36324	1.32916
17.2214	13.3565	1.10919	0.92522
18.3081	14.5354	1.04105	0.90291
18.7578	15.3591	1.40511	0.96841
18.6333	15.8169	1.44312	0.9764
17.7695	15.7446	1.5033	0.9114
16.0358	14.9278	1.43485	0.85382
13.7508	13.2419	1.11315	0.86407
11.4204	10.7355	0.84365	0.91066
8.94562	7.67075	0.7174	0.92718
7.55639	4.56325	0.37375	0.88578
9.70481	3.54988	0.09792	0.79692
12.5199	6.40168	0.36962	0.69731
13.7407	9.62558	0.49619	0.62998
13.4395	11.6192	0.4439	0.61025
12.434	11.9662	0.3475	0.61834
11.424	10.9217	0.3249	0.62603
10.6806	9.3088	0.22061	0.62435
10.1092	8.07638	0.25747	0.62574
9.77335	7.68819	0.3798	0.64527
9.67998	8.03121	0.3151	0.68203
9.68747	8.70741	0.37627	0.71916
9.79363	9.36437	0.29806	0.74761
9.93803	9.86651	0.26247	0.77756
10.128	10.2382	0.33546	0.82009
10.4559	10.5437	0.2888	0.86877
10.8656	10.814	0.19872	0.9047
11.1381	11.0383	0.22811	0.91649
11.1739	11.1849	0.25635	0.90969
10.9646	11.2294	0.27117	0.89736
10.6315	11.1655	0.30454	0.88704
10.3235	10.9839	0.20395	0.87696
9.85956	10.6718	0.13989	0.86095
9.07331	10.2502	0.15027	0.83495
8.13699	9.77827	0.10977	0.80131
7.22803	9.30683	0.0648	0.7694
6.32819	8.83344	0.22229	0.74996
5.56257	8.35006	0.38117	0.74779
5.13654	7.96342	0.19058	0.76076
5.17569	7.8814	0.46495	0.78288
5.75317	8.22948	0.62052	0.80677
6.84557	8.98494	0.30818	0.82532
8.51875	10.1017	0.40827	0.83319
10.3606	11.4852	0.48019	0.82701
11.7007	12.8214	0.182	0.80762
11.7053	13.5701	0.14432	0.78923
12.1656	13.3105	0.27812	0.80046
15.859	12.5493	0.32211	0.83811
18.6824	12.7192	0.73236	0.8262
18.3956	13.7853	2.0394	0.92055
16.2013	14.1154	4.33679	2.00253
13.4881	12.7764	7.36758	4.22767
10.4766	9.87973	10.5171	7.1903
7.44363	6.32305	13.387	10.2616
4.75888	3.33554	15.735	12.7953
2.49232	1.64561	17.442	14.514
0.73158	1.08255	18.4469	15.5015
0.7541	1.03208	18.6993	15.901
1.56479	1.22431	18.192	15.7969
1.82146	1.40869	17.0058	15.2039
1.63922	1.38374	15.3038	14.0715
1.34591	1.14413	13.2587	12.359
1.05227	0.80678	10.918	9.98971
0.77522	0.52861	8.50878	6.9107
0.61951	0.41681	8.32408	4.16695
0.43787	0.40379	11.1304	5.6205
0.16726	0.40353	13.8818	9.29105
0.3014	0.41096	15.163	11.8652
0.32134	0.42658	14.939	12.5092
0.30833	0.43752	13.7408	11.5825
0.25096	0.42841	12.2192	9.92175
0.17533	0.40159	10.7971	8.37482
0.28335	0.37785	9.63266	7.54185
0.46815	0.37804	8.85836	7.50829
0.44731	0.41233	8.52341	7.96645
0.21703	0.46989	8.51878	8.57345
0.11159	0.52897	8.64668	9.12556
0.20273	0.576	8.77363	9.54622
0.20466	0.60626	8.89288	9.83773
0.20629	0.61591	9.01516	10.0463
0.15971	0.60148	9.2304	10.2129
0.11721	0.56783	9.56761	10.3579
0.23343	0.52718	9.84119	10.4814
0.23997	0.48875	9.91277	10.5597
0.18121	0.45593	9.76569	10.5612
0.33565	0.42916	9.46475	10.4564
0.14961	0.40814	9.10273	10.2266
0.45734	0.39527	8.71147	9.88474
0.25912	0.39456	8.33319	9.47293
0.19498	0.40462	7.80152	9.01972
0.20866	0.41767	6.95207	8.4954
0.14929	0.42679	5.92731	7.84846
0.22442	0.42981	4.93654	7.14749
0.20332	0.42756	4.0782	6.67682
0.1689	0.42154	3.94677	6.80939
0.10259	0.41253	5.03471	7.72402
0.06366	0.40083	7.51876	9.34565
0.10218	0.38908	10.6517	11.3895
0.16085	0.3866	12.4457	13.3741
0.11508	0.41672	12.3943	14.7469
0.05366	0.50687	13.8045	15.0273
0.10699	0.6262	17.4709	14.4016
0.46846	0.64339	18.983	13.9847
1.773	0.54174	18.1754	13.8455
4.14911	1.36621	15.8439	12.6387
7.01692	3.32902	12.7705	9.96982
9.55113	5.98112	9.33005	6.6693
11.6029	8.71706	6.24944	3.7655
13.4002	10.8879	3.90207	1.88189
14.9845	12.249	2.01302	1.0385
16.1874	13.0227	0.69668	0.83566
16.9694	13.5301	0.78339	0.94747
17.1606	13.9046	1.39292	1.0932
16.7257	14.0843	1.60329	1.10885
15.8013	13.9524	1.51413	0.99697
14.2813	13.399	1.30394	0.8761
12.2853	12.2232	1.08419	0.83294
10.2854	10.1637	0.97345	0.81443
8.32935	7.20299	0.81564	0.75422
7.3219	3.95822	0.49343	0.65125
9.0191	3.09166	0.42845	0.54932
11.3827	5.61708	0.39151	0.49687
12.6284	8.21983	0.57393	0.50168
12.6694	9.91612	0.4854	0.53515
11.9673	10.2947	0.31467	0.56579
10.9561	9.57596	0.32785	0.57889
9.95689	8.53839	0.48255	0.57682
9.1674	7.80399	0.47126	0.57081
8.67346	7.52623	0.37807	0.57476
8.54294	7.60394	0.19786	0.59259
8.60092	7.90171	0.12007	0.61943
8.66205	8.32066	0.24808	0.65585
8.78459	8.78085	0.23683	0.70566
9.0847	9.21039	0.18465	0.76383
9.5059	9.5612	0.13552	0.81731
9.83692	9.82819	0.24483	0.8578
10.1553	10.034	0.37648	0.88571
10.4627	10.1937	0.35711	0.9027
10.5744	10.3085	0.2529	0.90636
10.4635	10.3688	0.17767	0.89076
10.3871	10.3561	0.14142	0.85225
10.4777	10.2496	0.13939	0.79649
10.3204	10.0408	0.13972	0.73802
9.74028	9.74689	0.10026	0.69268
8.83087	9.38521	0.24865	0.67073
7.75733	8.9501	0.32968	0.67368
6.74285	8.44286	0.33109	0.6952
5.59889	7.877	0.30081	0.72561
4.47585	7.30718	0.13544	0.75668
4.01098	6.94972	0.1862	0.78359
4.50368	7.12308	0.24904	0.80366
5.73845	7.92196	0.25574	0.81269
7.64172	9.18938	0.24679	0.80445
10.3003	10.8214	0.30212	0.77778
12.8332	12.7804	0.39123	0.74441
14.2492	14.8603	0.81307	0.7334
16.1845	16.5146	1.65432	0.82834
19.224	17.1003	2.83857	1.26695
20.1526	16.6874	4.37834	2.33618
18.721	15.8896	6.64641	4.11825
16.0455	14.3887	9.3169	6.45582
12.9523	11.6579	11.9973	8.99945
9.7867	8.29491	14.769	11.4056
6.6776	5.19812	17.3094	13.5449
4.02789	2.88648	19.0965	15.3764
2.02183	1.60231	20.0198	16.7514
0.79353	1.12069	20.1032	17.4958
1.21721	1.0131	19.3448	17.4968
1.5537	1.21049	17.7761	16.6904
1.7026	1.47789	15.4348	15.0542
1.67949	1.54347	12.6331	12.4907
1.45773	1.32035	9.90567	8.91039
1.26531	0.90383	9.31364	5.36019
0.8845	0.5022	12.0759	6.33468
0.4772	0.36025	15.2204	10.4791
0.28516	0.41891	16.8335	13.4599
0.23031	0.43509	16.6448	14.1746
0.28765	0.39745	15.2543	13.0234
0.15881	0.36097	13.5117	10.9486
0.15003	0.35503	11.9884	8.90979
0.26813	0.37634	10.821	7.68157
0.27908	0.40956	10.0385	7.51255
0.27203	0.44481	9.54709	8.03407
0.3571	0.48554	9.10324	8.70348
0.41881	0.54051	8.87169	9.22242
0.39225	0.60425	8.95468	9.55997
0.35766	0.65337	9.18433	9.79195
0.30286	0.67227	9.44972	9.98913
0.19806	0.66505	9.59513	10.1547
0.10594	0.64067	9.63022	10.2483
0.07898	0.6027	9.70785	10.2409
0.11121	0.55376	9.69231	10.1229
0.21861	0.50233	9.40837	9.90688
0.26279	0.45964	8.93673	9.60848
0.13591	0.43125	8.31839	9.22909
0.09551	0.41668	7.71092	8.78566
0.09822	0.4125	7.3125	8.32188
0.16224	0.4137	6.86369	7.86
0.17031	0.41569	6.16003	7.35334
0.05585	0.41577	5.33011	6.72338
0.11165	0.41421	4.28926	6.0022
0.17025	0.41384	3.3787	5.47199
0.17653	0.41717	3.6959	5.6172
0.17418	0.42428	5.34505	6.77502
0.21423	0.43315	8.02983	8.95609
0.13231	0.44219	11.8388	11.9208
0.03677	0.45493	15.3512	15.2326
0.09613	0.4845	17.34	18.3301
0.13944	0.54482	18.5613	20.4179
0.21165	0.61847	19.1429	20.8603
0.4093	0.63486	17.836	19.8679
1.19753	0.59001	15.4276	17.8058
3.00787	0.98462	12.8643	14.5339
5.3842	2.07497	10.0472	10.36
7.42414	3.63084	7.23821	6.30595
9.0563	5.50317	4.73535	3.2671
10.5185	7.41714	2.70537	1.56523
11.9489	8.98694	1.35377	0.92887
13.3176	10.066	0.75241	0.78691
14.5526	10.8575	1.187	0.89276
15.6934	11.6431	1.82274	1.02986
16.4268	12.5194	1.89137	1.04489
16.5505	13.3668	1.5083	0.95171
16.0799	13.9479	1.00282	0.87556
14.8774	13.9725	0.68703	0.8761
13.0671	13.2263	0.69856	0.86916
11.1696	11.699	0.55353	0.78941
9.05376	9.43492	0.25196	0.64713
6.96905	6.4275	0.23716	0.49859
7.34122	3.3463	0.52584	0.41011
9.30168	4.06603	0.64431	0.40501
10.5372	7.28402	0.57585	0.4495
10.6982	9.46574	0.42057	0.50142
10.061	9.98508	0.36756	0.5416
9.04919	9.32442	0.4608	0.5688
8.19703	8.30966	0.55756	0.58778
7.80997	7.52498	0.65741	0.60386
7.82848	7.20604	0.49975	0.61761
7.98398	7.38619	0.30204	0.63171
8.26815	7.98061	0.40163	0.65819
8.66728	8.79323	0.46154	0.70645
9.11355	9.60691	0.46729	0.76822
9.7512	10.2923	0.41135	0.82215
10.5526	10.8326	0.38056	0.854
11.3061	11.2609	0.40723	0.86471
11.8984	11.5986	0.39437	0.86028
12.2981	11.8652	0.27042	0.84223
12.5039	12.0764	0.09607	0.80705
12.5868	12.2167	0.05786	0.75335
12.6091	12.2541	0.14501	0.6908
12.6177	12.1609	0.18739	0.63787
12.3799	11.9188	0.16251	0.60954
11.6218	11.5344	0.07035	0.61094
10.7581	11.0407	0.1271	0.63803
10.1457	10.4651	0.14838	0.67816
9.35009	9.78095	0.23784	0.71509
8.04237	8.91729	0.29669	0.73903
6.52724	7.88226	0.12133	0.74986
5.04926	6.86576	0.14336	0.75209
3.88008	6.17177	0.28228	0.74965
3.63708	6.01903	0.24543	0.74307
4.72829	6.49999	0.0572	0.72976
6.82428	7.69129	0.18397	0.70762
9.97109	9.64884	0.11784	0.68109
13.4402	12.3536	0.28923	0.66341
15.8992	15.4694	0.40262	0.6645
18.2284	18.2376	0.66061	0.68985
21.0507	19.81	1.2353	0.832
22.1729	19.645	2.27544	1.34594
20.8811	17.92	4.33762	2.38891
17.9752	15.4026	7.03938	4.00947
14.3678	12.348	9.72024	6.21904
10.5344	8.72661	12.0681	8.76863
7.00389	5.25998	13.9749	11.1518
4.24679	2.79466	15.6822	12.9844
2.34284	1.64178	17.2667	14.2236
0.94096	1.37419	18.39	15.041
0.78418	1.23561	18.768	15.5727
1.26184	1.17181	18.322	15.7633
1.71291	1.2915	17.2167	15.4118
2.19432	1.4133	15.5638	14.2937
1.80405	1.3591	13.3834	12.2849
1.09994	1.09472	10.9217	9.48288
1.02728	0.71076	9.157	6.24808
0.96813	0.37876	10.5934	4.46236
0.71349	0.29595	14.3617	7.4528
0.45086	0.36493	17.5732	11.931
0.31959	0.39854	19.0542	15.3115
0.55042	0.4015	18.8281	16.5739
0.50445	0.40952	17.4907	15.6198
0.42423	0.43103	15.671	13.2643
0.48032	0.45452	13.8747	10.7647
0.50956	0.4691	12.2942	9.11529
0.5273	0.47634	11.0998	8.56836
0.42292	0.4846	10.3179	8.70663
0.22995	0.50009	9.75379	9.03675
0.17087	0.52082	9.41387	9.27982
0.2266	0.53631	9.26086	9.3849
0.25711	0.54333	9.23288	9.46855
0.18235	0.55233	9.34849	9.62568
0.09805	0.57117	9.58926	9.80952
0.13716	0.59235	9.88092	9.90535
0.32345	0.60051	9.94991	9.82712
0.35068	0.58882	9.59579	9.54258
0.23702	0.56034	8.90382	9.07001
0.29512	0.51833	7.94429	8.47212
0.38163	0.46526	6.80963	7.80348
0.12147	0.40795	5.69202	7.09465
0.36079	0.35784	4.58348	6.47328
0.33719	0.32397	3.67075	6.23095
0.2436	0.30781	3.76753	6.64398
0.25677	0.30766	5.40848	7.80872
0.23655	0.3231	8.50326	9.78921
0.21638	0.35604	12.7017	12.6051
0.208	0.40979	16.3972	16.0354
0.04886	0.48325	18.4603	19.4539
0.17974	0.55868	19.4764	21.6352
0.251	0.58079	19.813	21.4931
0.79452	0.52806	18.6144	19.391
2.23573	0.95847	16.1575	16.4602
4.71254	2.31135	13.446	13.0311
7.59775	4.2695	10.445	9.21306
10.1668	6.48243	7.29588	5.62041
12.3276	8.71243	4.62105	2.9014
14.1932	10.7426	2.46034	1.39005
15.6764	12.3168	1.07337	0.95451
16.7904	13.3725	1.13457	0.96962
17.5443	14.0817	1.55606	1.07274
17.6537	14.5873	1.60575	1.0974
16.9648	14.8179	1.32109	0.98428
15.4147	14.4868	0.99004	0.79039
13.2618	13.2532	0.83283	0.66119
10.901	10.9595	0.78012	0.6741
8.27692	7.77883	0.73868	0.71886
6.40429	4.31469	0.40627	0.70829
7.50193	2.35258	0.10805	0.6417
9.62239	4.32801	0.28439	0.56415
10.714	6.81206	0.4136	0.5289
10.7235	8.3049	0.45761	0.55079
10.2239	8.61099	0.4148	0.59824
9.65149	8.17817	0.41665	0.63061
9.2238	7.56321	0.20037	0.63504
9.04068	7.1496	0.2663	0.6267
9.10426	7.14183	0.31042	0.62383
9.29721	7.56509	0.23235	0.63241
9.60215	8.26691	0.11503	0.64629
9.99405	9.00062	0.28452	0.66312
10.2295	9.59549	0.17967	0.69419
10.3546	10.0303	0.2657	0.74887
10.5788	10.3682	0.36774	0.81687
10.9569	10.665	0.32862	0.87428
11.3636	10.9209	0.28689	0.90517
11.5011	11.0983	0.2551	0.91025
11.3167	11.1571	0.17852	0.89791
11.0194	11.0798	0.14978	0.87491
10.7154	10.8835	0.17147	0.84332
10.3914	10.608	0.1115	0.80312
9.98597	10.2979	0.11035	0.75849
9.35779	9.97691	0.1554	0.71955
8.37109	9.63535	0.06543	0.69722
7.26764	9.25362	0.12108	0.69796
6.34889	8.79582	0.23038	0.72071
5.43082	8.24241	0.34484	0.7553
4.6047	7.71327	0.27684	0.78715
4.30006	7.46303	0.08653	0.80575
4.73449	7.66464	0.06222	0.80712
5.64858	8.30497	0.19843	0.79172
7.18366	9.38139	0.20854	0.7638
9.70517	10.9525	0.10955	0.73148
12.0923	12.8505	0.2455	0.70764
12.8657	14.4673	0.31894	0.71053
13.1	15.0511	0.60704	0.75812
15.4807	14.5103	1.16332	0.87593
18.2234	13.7217	1.98526	1.16777
18.3944	13.345	3.22586	1.85013
16.5311	12.9509	4.76644	3.03789
13.9075	11.8143	6.46175	4.61087
10.9159	9.54309	8.27853	6.28855
7.87307	6.48956	10.0379	7.81116
5.35988	3.64487	11.7194	9.12819
3.38723	1.76295	13.3534	10.3427
1.68854	0.97199	14.764	11.5152
0.44661	0.88987	15.8244	12.5986
1.0691	1.02564	16.4346	13.497
1.66128	1.19534	16.502	14.1235
1.80684	1.28934	15.9999	14.3446
1.72542	1.24829	14.9648	13.892
1.49258	1.06854	13.2735	12.4596
1.09734	0.80568	11.1302	9.95359
0.70673	0.53885	9.27812	6.73941
0.42328	0.31883	9.04058	4.23311
0.28357	0.22647	11.7686	5.33569
0.26238	0.28797	15.4964	8.76991
0.36467	0.35917	18.095	12.1915
0.44104	0.40545	19	14.3924
0.41765	0.44116	18.2663	14.9005
0.30267	0.469	16.5188	13.939
0.35433	0.48096	14.5224	12.005
0.42632	0.47811	12.714	9.85671
0.49634	0.47821	11.3394	8.39511
0.46703	0.49224	10.4912	7.96895
0.2877	0.51234	10.0082	8.1179
0.16108	0.5286	9.64577	8.33539
0.16124	0.53842	9.36011	8.49674
0.15112	0.54394	9.20363	8.62388
0.17469	0.54706	9.12742	8.71277
0.22673	0.54827	9.16488	8.76464
0.24514	0.54777	9.30691	8.78757
0.22957	0.54557	9.40133	8.78453
0.24319	0.54103	9.35401	8.73312
0.19606	0.53181	9.10349	8.56687
0.28388	0.51427	8.55381	8.21322
0.21868	0.48645	7.68994	7.63834
0.13739	0.45096	6.40319	6.8568
0.2186	0.41543	4.62438	5.89899
0.22724	0.38815	2.79347	4.93407
0.20816	0.37365	2.83427	4.76213
0.14162	0.37299	5.18188	6.44541
0.15569	0.38271	8.66336	9.81258
0.14757	0.39583	13.7514	14.4508
0.19802	0.41401	19.1781	20.0244
0.13768	0.45419	22.4861	25.372
0.21207	0.50067	22.8855	28.5618
0.62906	0.45531	21.3334	28.2606
1.77787	0.45731	18.6933	24.5618
3.93772	1.40969	15.0957	18.6481
6.82081	3.23147	11.303	12.3828
9.65337	5.56139	8.11148	7.54623
12.0513	7.94622	5.31756	4.51028
14.0901	10.1119	2.80318	2.50784
15.6945	11.9449	1.16173	1.14724
16.8587	13.3274	0.73595	0.70621
17.624	14.2114	1.36692	0.98111
17.9297	14.6574	1.92448	1.12361
17.6521	14.7167	1.81009	1.03893
16.6711	14.3308	1.2229	0.85234
14.8109	13.3526	0.70466	0.75611
12.3171	11.6908	0.42296	0.80701
9.47366	9.3237	0.40822	0.86758
6.63733	6.30145	0.51829	0.8588
6.38726	3.15238	0.22471	0.78371
8.3422	2.39921	0.14049	0.67719
9.52273	4.65757	0.31946	0.5958
9.49282	6.60914	0.44537	0.58401
9.03186	7.45406	0.31374	0.62967
8.63116	7.30875	0.12938	0.68562
8.27851	6.84177	0.12502	0.72141
8.03709	6.6056	0.33717	0.74169
8.06527	6.78776	0.42824	0.76325
8.42548	7.35155	0.18182	0.78971
9.0137	8.12263	0.40479	0.80995
9.58879	8.89822	0.3414	0.81661
10.082	9.58345	0.27215	0.8202
10.5909	10.1806	0.26773	0.83755
11.141	10.686	0.29137	0.87106
11.7353	11.0703	0.2339	0.90775
12.227	11.3174	0.30984	0.93512
12.4635	11.4472	0.35115	0.94812
12.5243	11.5019	0.40136	0.94433
12.4428	11.5102	0.41024	0.9219
12.3308	11.477	0.30835	0.88254
12.267	11.3938	0.09489	0.83327
12.0714	11.2471	0.12445	0.78517
11.6091	11.0187	0.11888	0.74917
10.8867	10.6658	0.08623	0.73136
9.90744	10.1226	0.1052	0.73338
8.81483	9.36408	0.21848	0.75344
7.6832	8.46041	0.37086	0.78452
6.28659	7.55609	0.42477	0.81632
4.77974	6.78217	0.20996	0.84118
3.75614	6.24463	0.06164	0.85506
3.86144	6.1263	0.13901	0.85629
5.30417	6.64531	0.03117	0.84744
7.4146	7.97684	0.16441	0.83384
10.1704	10.1779	0.16652	0.81725
13.4432	12.9925	0.14419	0.79516
16.4862	15.8417	0.08951	0.76967
18.7949	18.0686	0.20165	0.75743
20.4216	19.2309	0.29044	0.77571
20.846	19.1785	0.66381	0.82103
19.677	18.1547	1.7915	0.98698
17.126	16.7487	3.89422	1.68575
13.9152	14.8915	6.36942	3.22701
10.5237	11.8669	8.57173	5.41669
7.30823	7.88594	10.4643	7.76156
4.64385	4.18074	12.1043	9.77599
2.62589	1.87079	13.6188	11.224
1.16773	1.26852	15.047	12.1874
0.93373	1.22001	16.2456	12.9178
1.299	1.14989	16.9743	13.5772
1.59168	1.18472	17.0289	14.1101
1.8673	1.24607	16.4614	14.3092
1.76297	1.20438	15.3745	13.9746
1.05878	1.02691	13.7051	12.99
0.4911	0.76496	11.6897	11.203
0.34969	0.50817	9.80369	8.43697
0.19394	0.32931	8.91291	5.16723
0.68388	0.27636	10.7115	4.76565
0.7154	0.29651	14.1505	8.35356
0.43364	0.31313	16.8114	11.8073
0.3687	0.32721	17.9709	13.797
0.39847	0.35223	17.7014	14.1806
0.28412	0.38952	16.3556	13.138
0.15188	0.43148	14.5267	11.2099
0.31356	0.46765	12.7275	9.25055
0.50844	0.49502	11.261	7.93847
0.25907	0.51977	10.3311	7.50457
0.05448	0.5463	9.93178	7.71107
0.19849	0.56393	9.81952	8.13443
0.15188	0.56051	9.77202	8.51331
0.14902	0.54249	9.71182	8.78546
0.23883	0.527	9.65069	8.97914
0.24216	0.52129	9.67853	9.08901
0.24005	0.51729	9.73494	9.06378
0.28632	0.50532	9.61391	8.87015
0.28884	0.48611	9.14337	8.51861
0.07196	0.46716	8.30382	8.06027
0.07326	0.45384	7.32292	7.54554
0.0955	0.44612	6.37209	7.0078
0.32062	0.44004	5.50357	6.52947
0.3166	0.43063	4.69118	6.23295
0.05199	0.41511	3.86637	6.16202
0.21708	0.39712	3.62013	6.29496
0.23349	0.3884	4.35147	6.77027
0.18727	0.39862	5.99989	7.98035
0.12933	0.42161	8.53909	10.231
0.15351	0.44102	12.2819	13.4495
0.23998	0.45043	16.4505	17.3687
0.18227	0.46362	19.038	21.5407
0.20635	0.49856	19.735	24.8724
0.41816	0.53712	19.4968	25.7819
0.48036	0.5044	18.2664	23.5368
0.86573	0.4469	15.9713	19.13
2.31573	1.08298	13.2423	14.3315
4.79556	2.50838	10.7341	10.3101
7.37773	4.38263	8.13732	7.30298
9.41957	6.34898	5.30631	4.89084
11.1141	8.1947	3.04942	2.77709
12.8439	9.81623	1.62138	1.14324
14.5143	11.1279	0.85578	0.51961
15.9416	12.1847	1.14995	0.84499
17.1311	13.1732	1.33167	1.0022
17.8954	14.1859	1.27329	0.96611
18.0209	15.0729	1.07841	0.84738
17.3834	15.4765	0.98571	0.75731
15.8527	15.0305	0.70478	0.75294
13.7944	13.5365	0.39336	0.79577
11.3987	11.0274	0.40594	0.8293
8.30898	7.80797	0.4747	0.81954
6.31482	4.35477	0.29946	0.75905
7.41772	2.21799	0.292	0.67643
9.0544	4.47485	0.69116	0.61678
9.76888	7.07528	0.52305	0.59511
9.63488	8.55207	0.38644	0.58427
9.2256	8.91075	0.44355	0.56286
8.87138	8.55215	0.25094	0.54499
8.58467	7.99022	0.33404	0.5514
8.54902	7.66561	0.41808	0.57948
8.88974	7.80418	0.40746	0.61561
9.48063	8.39492	0.21473	0.65622
10.061	9.22436	0.24977	0.71137
10.4646	10.0313	0.3319	0.78874
10.7934	10.6717	0.41181	0.87641
11.2264	11.1449	0.43475	0.94891
11.7378	11.5098	0.40331	0.99011
12.2116	11.7986	0.4593	1.00113
12.5646	12.004	0.435	0.989
12.786	12.1082	0.27308	0.95817
12.839	12.1104	0.12897	0.91158
12.7253	12.0366	0.07824	0.85489
12.589	11.9148	0.09681	0.79856
12.4606	11.7531	0.13178	0.75432
12.1414	11.5468	0.13473	0.72893
11.7123	11.2911	0.10067	0.72407
11.4012	10.9697	0.04999	0.73822
10.8818	10.5244	0.11416	0.76405
9.86985	9.85963	0.08598	0.78912
8.5716	8.92111	0.10141	0.80302
7.06829	7.76773	0.25138	0.80115
5.10873	6.5537	0.40192	0.78507
2.98211	5.459	0.21258	0.76332
2.33507	4.85064	0.09164	0.74624
4.02715	5.5006	0.05622	0.73704
6.61571	7.63229	0.10245	0.73103
10.4013	10.742	0.19694	0.72472
15.1286	14.5534	0.40692	0.72567
19.0974	18.8555	0.70446	0.75278
22.1406	22.7869	1.26673	0.84001
23.9837	24.9428	2.14291	1.09649
23.3451	24.5855	3.53069	1.78344
20.6523	22.1376	5.68908	3.16795
17.1329	18.3136	8.30566	5.26736
13.3199	13.8451	10.9415	7.7996
9.41531	9.62667	13.2654	10.2906
6.04606	6.096	15.1622	12.3071
3.49453	3.29177	16.7375	13.7078
1.7179	1.40324	17.8362	14.5993
0.75577	0.89634	18.2486	15.0967
1.40147	1.26274	17.9628	15.2307
2.16697	1.57688	16.9867	14.9528
2.26148	1.75166	15.4344	14.165
1.92838	1.72111	13.4547	12.7725
1.46875	1.43295	11.2987	10.6187
0.96327	0.96348	9.33164	7.56744
0.55702	0.50182	9.28439	4.59462
0.408	0.31851	12.2882	5.97163
0.30036	0.4032	15.5454	10.1175
0.21115	0.44165	17.2612	13.2537
0.37294	0.42042	17.3211	14.3658
0.51495	0.40375	16.2507	13.6752
0.38195	0.42037	14.6852	11.8612
0.16258	0.44958	13.1417	9.75766
0.17309	0.4648	11.89	8.23176
0.25711	0.4691	11.0167	7.76505
0.22175	0.48295	10.4378	8.13406
0.25514	0.51346	10.0573	8.73463
0.21961	0.54045	9.87186	9.17374
0.19039	0.54495	9.77688	9.38344
0.2493	0.53696	9.69584	9.44314
0.26269	0.54122	9.63176	9.46081
0.23894	0.56843	9.5626	9.47856
0.26573	0.60458	9.55435	9.46378
0.2407	0.62504	9.56757	9.38025
0.27096	0.61762	9.38462	9.21309
0.26717	0.5864	8.8172	8.95716
0.1773	0.53823	8.02365	8.58838
0.1075	0.47766	7.19249	8.06404
0.28932	0.41175	6.23803	7.39079
0.26125	0.35254	5.24174	6.66732
0.08655	0.31305	4.16472	6.03558
0.27359	0.30116	3.22644	5.61684
0.2929	0.31866	3.51516	5.59775
0.30726	0.36026	4.75673	6.33742
0.21916	0.40974	6.67232	8.09949
0.10046	0.44596	9.85305	10.8676
0.11521	0.45951	14.0695	14.5772
0.11418	0.46033	17.6749	18.9678
0.08258	0.46726	19.4496	22.9886
0.15995	0.4846	19.9417	24.9765
0.24033	0.47945	19.2341	23.9593
0.58088	0.41314	16.9148	20.436
1.56806	0.51133	13.8401	15.7592
3.47755	1.25389	10.8814	11.3033
5.67069	2.6154	8.08541	7.86153
7.39474	4.39116	5.76619	5.21535
8.65483	6.19976	3.66141	2.95495
9.6692	7.66447	1.59934	1.21244
10.6389	8.60331	0.84652	0.58332
11.6755	9.09754	1.20585	0.94528
12.7063	9.41436	1.54653	1.10502
13.7043	9.83422	1.58001	1.04266
14.5421	10.5146	1.33509	0.88995
14.9324	11.3889	1.21896	0.7917
14.7028	12.1844	0.94233	0.81198
13.7074	12.5534	0.50482	0.87645
12.031	12.1268	0.35015	0.91159
10.235	10.6185	0.25466	0.89165
8.5204	8.04649	0.36133	0.81965
6.83757	4.83407	0.45189	0.72573
7.0099	2.23116	0.2774	0.6525
9.34774	3.58793	0.38626	0.61821
11.384	6.36352	0.60859	0.60178
12.0548	8.59503	0.57871	0.58418
11.5999	9.65618	0.47142	0.57858
10.7338	9.52365	0.34982	0.5988
9.99271	8.75302	0.38081	0.63618
9.50677	7.92605	0.25539	0.67733
9.2085	7.37383	0.24822	0.71905
8.97228	7.21866	0.29255	0.76925
8.79579	7.42073	0.15379	0.83318
8.80105	7.84614	0.13241	0.90136
9.08626	8.34975	0.19332	0.95611
9.60433	8.83496	0.25641	0.98726
10.0738	9.25551	0.24568	0.99572
10.4364	9.5985	0.29109	0.98519
10.7208	9.86394	0.3049	0.9588
10.8413	10.042	0.25853	0.92222
10.8733	10.1211	0.15091	0.88396
10.8997	10.0896	0.08784	0.85183
10.8379	9.93263	0.16561	0.83017
10.623	9.64995	0.20075	0.81956
10.1423	9.26298	0.16355	0.81886
9.30984	8.79889	0.11503	0.8263
8.33098	8.25793	0.17674	0.83774
7.30161	7.61578	0.31342	0.84643
6.07789	6.88203	0.17428	0.84612
4.63104	6.0926	0.10008	0.83406
3.1526	5.31072	0.05764	0.81314
2.71532	4.81536	0.17451	0.79341
4.105	5.15185	0.36753	0.78675
6.52775	6.64465	0.44817	0.79712
10.2967	9.29113	0.49632	0.81806
15.3901	13.1095	0.66276	0.84788
19.6771	17.8225	1.01575	0.92761
21.9624	22.5009	1.83506	1.17205
22.2848	25.695	3.05019	1.69954
20.7696	25.9722	4.34243	2.53275
17.9453	23.0113	6.03841	3.69603
14.4561	18.2766	8.31181	5.30829
11.0176	13.6579	10.8782	7.40625
7.809	9.63268	13.3165	9.7664
4.90491	5.99369	15.4173	12.0057
2.74688	3.07929	17.2205	13.8151
1.21254	1.4588	18.5239	15.1161
1.09224	1.20383	19.1213	15.9565
1.60963	1.28251	18.9705	16.3156
1.69795	1.33432	18.049	16.0918
1.65324	1.3633	16.2884	15.1277
1.46319	1.27656	13.8321	13.2697
1.18738	1.03743	11.2262	10.5445
0.83625	0.69303	9.39389	7.2146
0.49641	0.36865	10.6799	4.65783
0.31663	0.27849	14.2767	6.73439
0.31697	0.3535	17.1504	11.073
0.31143	0.38976	18.177	14.4808
0.28938	0.3948	17.4652	15.7473
0.31931	0.4141	15.7269	14.7032
0.31496	0.44741	13.8569	12.2058
0.21214	0.4701	12.3064	9.61868
0.27961	0.48263	11.0842	8.04324
0.18589	0.50103	10.2542	7.71401
0.2663	0.53016	9.8453	8.06108
0.16203	0.56042	9.73405	8.56609
0.08895	0.58248	9.78087	9.02126
0.21621	0.59477	9.89881	9.36616
0.32598	0.59997	10.0144	9.58102
0.34192	0.6042	10.0104	9.66201
0.24252	0.61608	9.85675	9.63127
0.16749	0.63805	9.69787	9.50826
0.19275	0.65892	9.53388	9.2852
0.30353	0.66118	9.09579	8.94733
0.31217	0.63819	8.30143	8.50614
0.15461	0.59714	7.32469	8.00649
0.03272	0.54807	6.38269	7.48356
0.10313	0.49952	5.63842	6.94178
0.11533	0.45878	4.95653	6.41657
0.086	0.43024	4.11727	5.99513
0.09627	0.41762	3.51724	5.75757
0.18585	0.42473	3.56843	5.7942
0.26233	0.45043	4.63773	6.34941
0.11278	0.488	6.50563	7.79892
0.06447	0.52785	8.97019	10.2508
0.21823	0.55723	12.1274	13.3569
0.09014	0.56814	15.6909	16.5816
0.11985	0.57441	18.7287	19.3674
0.16721	0.60524	20.136	20.9698
0.19609	0.65372	19.7491	20.7605
0.48713	0.63324	18.023	18.9764
1.58731	0.51823	15.3342	16.2872
3.4958	1.0607	12.2883	12.9267
5.78012	2.52926	9.27753	9.25684
7.75319	4.51077	6.52647	6.06198
9.17316	6.52653	4.21475	3.71913
10.3678	8.10667	2.42337	2.05937
11.5817	9.12727	1.17384	0.93715
12.8399	9.85458	1.04478	0.54871
14.1404	10.6154	1.43418	0.79589
15.2325	11.5023	1.85301	0.95538
15.9983	12.3925	1.74454	0.9254
16.3955	13.1205	1.19489	0.78758
16.0452	13.4872	0.94326	0.70077
14.6773	13.2345	0.82003	0.74344
12.6823	12.2086	0.44746	0.80829
10.5898	10.3896	0.30156	0.80995
8.0928	7.81056	0.32722	0.74236
6.27947	4.73886	0.30312	0.64535
7.51918	2.22955	0.34526	0.57137
9.49532	3.61104	0.47783	0.54192
10.2975	6.33963	0.49444	0.54187
10.1129	8.1799	0.49324	0.549
9.58299	8.82428	0.44449	0.55547
8.98209	8.68847	0.42823	0.56664
8.56137	8.28706	0.36291	0.58559
8.42106	7.98042	0.25112	0.6097
8.45616	7.98512	0.11872	0.63646
8.62664	8.32137	0.14835	0.66879
8.92391	8.83004	0.13291	0.71689
9.31273	9.35605	0.279	0.78448
9.68795	9.84481	0.27688	0.85488
10.0059	10.2724	0.22205	0.90067
10.3889	10.6026	0.30903	0.90802
10.8268	10.8115	0.35012	0.88641
11.0535	10.914	0.30467	0.85557
11.0624	10.955	0.22192	0.82901
11.1633	10.9749	0.20101	0.80965
11.4088	10.9926	0.21824	0.79512
11.6074	11.0033	0.20055	0.78399
11.6202	10.9772	0.18253	0.77794
11.3408	10.8679	0.09773	0.78016
10.6948	10.6169	0.0278	0.79276
9.86507	10.1718	0.0813	0.81323
8.99515	9.53284	0.07509	0.83214
7.99125	8.77135	0.13667	0.83715
6.6888	7.99293	0.16248	0.82199
5.11488	7.27533	0.05556	0.79192
3.72092	6.69016	0.17561	0.76018
3.38571	6.39763	0.24197	0.73947
4.15515	6.57601	0.10257	0.73562
5.51665	7.33958	0.05392	0.74495
7.49372	8.72785	0.12306	0.75641
10.0178	10.5705	0.03481	0.76174
12.507	12.4865	0.08205	0.76725
13.7488	14.0454	0.1075	0.78862
14.0097	14.882	0.19199	0.82844
15.7554	14.8401	0.47511	0.86173
18.4244	14.4951	1.13222	0.89345
18.8775	14.8568	2.53517	1.23622
17.1998	15.2286	4.70615	2.39166
14.4972	13.9515	7.20621	4.34127
11.4055	10.8623	9.7224	6.71503
8.30922	7.10558	12.1502	9.08461
5.59868	3.90635	14.5457	11.2682
3.48798	1.98367	16.8217	13.2687
1.8149	1.33377	18.6268	15.015
0.58502	1.16787	19.6277	16.3281
1.05327	1.06227	19.7718	16.9996
1.66158	1.0595	19.0783	16.8486
1.81685	1.15182	17.6483	15.7494
1.66432	1.1963	15.6117	13.6826
1.38194	1.09991	13.2441	10.8407
1.02447	0.87593	10.8305	7.63449
0.71403	0.58099	9.66328	5.30363
0.47546	0.30444	12.283	6.54352
0.33509	0.21617	16.3835	9.89981
0.17548	0.30402	19.0572	12.967
0.35182	0.37808	19.6168	14.8459
0.65688	0.42019	18.5818	15.0224
0.5638	0.4457	16.8076	13.667
0.33734	0.4565	14.817	11.6303
0.25768	0.44985	12.8903	9.76461
0.33434	0.43548	11.3009	8.68038
0.44063	0.43614	10.0493	8.50637
0.45464	0.46921	9.12747	8.74915
0.38102	0.52215	8.57308	8.92455
0.31909	0.57427	8.31322	8.96218
0.29511	0.62335	8.32956	9.09558
0.26673	0.67205	8.65703	9.47578
0.28466	0.7101	9.24204	9.9742
0.22984	0.71714	9.87679	10.3917
0.29598	0.68101	10.4575	10.6419
0.26639	0.61026	10.7823	10.7182
0.31099	0.52623	10.5346	10.5964
0.33223	0.44847	9.94553	10.2303
0.17244	0.38818	9.26232	9.61954
0.39227	0.34743	8.33734	8.84027
0.31132	0.32397	7.18572	8.00627
0.24524	0.3178	5.74481	7.1918
0.39736	0.33219	4.30708	6.48941
0.30954	0.36869	3.64889	6.23428
0.1894	0.41826	4.50104	6.91468
0.15321	0.4599	6.78006	8.70429
0.04521	0.47426	10.3212	11.5039
0.11468	0.46961	14.1176	15.0663
0.08104	0.49931	16.7701	18.6278
0.08745	0.59433	18.7726	21.0661
0.2961	0.64777	20.3988	21.678
1.03976	0.49553	20.1658	20.3263
2.71092	0.90838	18.245	17.3512
5.55118	2.68373	15.0335	13.7774
8.73426	5.36549	11.4979	10.5126
11.4986	8.36971	8.29911	7.44424
13.8228	10.9724	5.33764	4.42941
15.7437	12.816	2.8737	1.97098
17.2993	13.9907	1.15211	0.77431
18.3879	14.716	0.81312	1.02227
18.7928	15.1557	1.60511	1.23765
18.4427	15.3561	1.89538	1.2118
17.3702	15.229	1.89231	1.01964
15.5973	14.6	1.53154	0.78079
13.3471	13.1822	1.06175	0.67803
10.6956	10.6603	0.79042	0.73231
7.76642	7.05232	0.63896	0.79866
6.39127	3.11895	0.40868	0.79842
8.20902	2.87984	0.0614	0.74269
10.39	5.93141	0.30421	0.68639
11.298	8.34749	0.46282	0.66791
11.1562	9.8122	0.43096	0.67769
10.6258	10.2526	0.37405	0.6778
10.0811	9.78485	0.31843	0.64883
9.60437	8.92346	0.21486	0.61264
9.27626	8.28497	0.31989	0.60446
9.24489	8.14333	0.23275	0.63578
9.46098	8.41422	0.26237	0.69169
9.8093	8.92314	0.19506	0.75285
10.2775	9.54432	0.36838	0.8098
10.6893	10.1736	0.47761	0.85873
11.0671	10.7254	0.2692	0.89734
11.6093	11.1664	0.2969	0.92499
12.2291	11.5144	0.34582	0.94197
12.739	11.7865	0.3784	0.94707
12.9792	11.9669	0.33493	0.93843
12.9493	12.0397	0.18262	0.91857
12.787	12.0113	0.11586	0.8943
12.572	11.894	0.18096	0.87136
12.3909	11.6935	0.2498	0.853
12.0594	11.3862	0.24062	0.8407
11.3485	10.9093	0.17513	0.83273
10.2026	10.2048	0.08193	0.82429
8.64631	9.27472	0.06881	0.81209
6.87375	8.18488	0.26503	0.79854
5.01429	7.01935	0.28823	0.78961
3.60377	6.00927	0.12969	0.78843
4.06034	5.89886	0.23659	0.79212
6.22228	7.36419	0.11247	0.79227
9.35457	10.0023	0.22191	0.77838
13.4493	13.2456	0.19168	0.74851
17.0553	16.7403	0.28848	0.7272
19.1474	19.8606	0.24917	0.75551
20.7754	21.8314	0.16896	0.82648
21.944	22.3481	0.9034	0.94181
21.397	21.412	2.88632	1.46696
18.9312	19.1761	5.96017	2.899
15.375	16.2976	9.39253	5.14366
11.538	13.2349	12.6808	7.88028
8.11198	9.74185	15.6227	10.8458
5.32946	5.96563	17.9958	13.6609
3.02247	2.7718	19.3982	15.7778
1.31419	0.9798	19.7497	16.8649
0.87507	0.98056	19.2152	16.9474
1.5456	1.23972	17.9322	16.1684
1.91321	1.33463	16.1035	14.6485
1.74544	1.30328	13.9216	12.5014
1.43871	1.14031	11.5495	9.85719
1.13524	0.90095	9.05343	6.83147
0.8833	0.66862	8.2894	4.09799
0.65407	0.51314	10.8119	4.95577
0.2816	0.44158	13.757	8.56017
0.25997	0.40272	15.3062	11.638
0.29523	0.38369	15.2851	12.9982
0.28093	0.40014	14.189	12.4827
0.14637	0.44253	12.7045	10.8293
0.14541	0.47366	11.3582	9.07766
0.2339	0.47066	10.2441	7.90294
0.21414	0.4475	9.42614	7.55252
0.29013	0.43256	9.01959	7.9025
0.3421	0.43594	8.90157	8.54551
0.25687	0.44546	8.97047	9.12537
0.22318	0.44846	9.14652	9.51304
0.11924	0.44735	9.28434	9.74635
0.16189	0.45254	9.25233	9.8908
0.13577	0.46771	9.10131	9.97598
0.11249	0.48732	8.99414	10.0084
0.21486	0.5043	8.99567	9.99171
0.2465	0.51382	9.03041	9.9325
0.34668	0.5116	8.9288	9.83483
0.14332	0.49452	8.68042	9.69752
0.15689	0.46343	8.24791	9.51105
0.16076	0.42434	7.72567	9.2605
0.0936	0.38771	7.26355	8.94246
0.08759	0.36442	6.80347	8.54865
0.29527	0.35972	6.22639	8.04589
0.23062	0.3715	5.39892	7.42395
0.06478	0.39375	4.35637	6.75113
0.12244	0.42039	3.47598	6.17805
0.10194	0.4464	3.19558	5.91503
0.14894	0.46581	3.77632	6.26024
0.12547	0.46938	5.36507	7.55822
0.21209	0.45167	7.97726	9.82715
0.23287	0.42472	10.8406	12.5169
0.18019	0.4148	12.8598	14.8167
0.0969	0.4376	14.2437	16.1353
0.08189	0.47411	16.3513	16.3182
0.1775	0.4601	17.6581	15.8257
0.71774	0.35654	17.2159	15.4167
2.20944	0.72055	15.7218	14.6624
4.41114	1.86188	13.2737	12.4269
6.58006	3.46508	10.11	8.90149
8.3537	5.25509	7.02574	5.38215
10.004	7.06505	4.3369	2.82284
11.7328	8.77082	2.26893	1.3708
13.4307	10.2107	0.88386	0.82335
14.8723	11.3301	0.82391	0.85418
16.0284	12.2462	1.42672	1.01319
16.8996	13.0959	1.92093	1.06588
17.284	13.8553	1.95136	0.99312
16.9443	14.3275	1.48941	0.89199
15.6961	14.2818	1.12662	0.86639
13.7442	13.4985	0.95329	0.88917
11.5701	11.8232	0.52608	0.86499
9.08679	9.33213	0.33988	0.77338
6.78898	6.25331	0.36115	0.65717
7.08196	3.09055	0.42017	0.56311
9.18651	3.35709	0.54874	0.50741
10.7348	6.65247	0.50206	0.48264
11.246	9.30177	0.43436	0.48779
10.951	10.4924	0.42093	0.52075
10.4432	10.285	0.43952	0.56627
10.0648	9.37543	0.49349	0.60979
9.84017	8.6047	0.39747	0.6477
9.84154	8.38923	0.16172	0.68665
9.95062	8.63356	0.12797	0.73213
10.0838	9.07503	0.25392	0.78465
10.2859	9.54628	0.31657	0.84364
10.4773	9.98415	0.36362	0.90313
10.7715	10.3879	0.38279	0.94935
11.2835	10.7676	0.38547	0.96705
11.7278	11.0995	0.38744	0.95079
11.9685	11.3425	0.33225	0.91069
12.0819	11.4731	0.21514	0.86438
12.0619	11.4978	0.10281	0.82466
11.887	11.4451	0.11751	0.79514
11.7149	11.3378	0.05628	0.77322
11.6559	11.1663	0.11796	0.75513
11.2924	10.8735	0.15947	0.73894
10.4087	10.3799	0.11439	0.72589
9.26755	9.65389	0.27909	0.72107
8.02967	8.75655	0.4361	0.72868
6.65395	7.8134	0.27039	0.74507
5.04415	6.93254	0.15477	0.7613
3.53781	6.207	0.1658	0.77324
2.99083	5.84043	0.31805	0.78551
3.88712	6.1243	0.44659	0.80405
5.74401	7.32405	0.44648	0.82863
8.88927	9.57206	0.55175	0.86211
12.8337	12.6232	0.66379	0.9374
15.6524	15.7617	1.02637	1.12718
17.2667	18.0877	1.88826	1.49216
19.2271	19.0177	3.10646	2.03842
20.6786	18.5113	4.45586	2.78082
20.0564	17.1248	6.0978	3.79444
17.735	15.7565	8.21374	5.14414
14.5794	14.2929	10.8214	6.88201
11.2833	11.7362	13.6301	9.08749
8.11677	8.17163	16.2588	11.6688
5.28874	4.76266	18.3249	14.2381
3.12911	2.4024	19.7647	16.3348
1.56918	1.26003	20.5711	17.6463
0.7607	1.06998	20.4134	18.0448
1.31475	1.26296	19.2708	17.4937
1.78777	1.45913	17.3349	15.9773
1.95226	1.484	14.8634	13.5512
1.82151	1.29832	12.1934	10.2964
1.47437	0.95286	10.2507	6.68583
1.058	0.55928	11.7244	5.99542
0.59815	0.2775	15.5483	10.1393
0.19842	0.27247	18.5065	14.5868
0.16468	0.37058	19.413	16.9665
0.22529	0.43093	18.4996	16.7349
0.1898	0.45831	16.5643	14.6979
0.38143	0.47229	14.5044	12.1081
0.40865	0.47698	12.8768	9.8356
0.29844	0.47387	11.6937	8.43448
0.30674	0.46964	10.8336	8.12987
0.38166	0.47391	10.2092	8.49134
0.44001	0.49644	9.65865	8.92261
0.38923	0.53759	9.3029	9.1857
0.18728	0.5843	9.32544	9.35682
0.25967	0.6216	9.56975	9.54443
0.279	0.64487	9.78565	9.74062
0.19735	0.65943	9.85575	9.8884
0.21983	0.66998	9.90279	9.95212
0.2295	0.67259	9.96999	9.90819
0.33952	0.65637	9.94422	9.73244
0.23334	0.61347	9.6383	9.42498
0.25025	0.54875	8.94267	9.00164
0.17262	0.47779	7.87147	8.46596
0.07275	0.41737	6.51376	7.83293
0.10944	0.37906	5.06054	7.12945
0.23456	0.36819	3.84247	6.42249
0.24317	0.38348	3.7135	5.98322
0.17316	0.41582	4.87364	6.27215
0.15622	0.45419	6.89069	7.53483
0.13903	0.49064	9.53332	9.77423
0.15038	0.51937	13.1057	13.0736
0.09224	0.53776	16.8032	17.3189
0.05459	0.54608	18.9864	21.731
0.07953	0.54144	19.9812	24.8771
0.38488	0.51362	20.4832	25.2881
1.0338	0.50314	19.2998	22.5862
2.3106	0.81103	16.7848	18.0213
4.25346	1.7459	13.7239	13.2512
6.36366	3.29667	10.5218	9.10204
8.16842	5.15782	7.57688	5.90455
9.61034	6.84559	5.12622	3.69875
10.6947	8.08913	3.057	2.27981
11.6029	8.93616	1.46834	1.44114
12.6154	9.55837	0.90011	0.96807
13.7145	10.1265	1.48659	0.85886
14.7319	10.7744	1.8463	1.01111
15.5339	11.5616	1.75187	1.10008
15.9532	12.4038	1.33876	1.04156
15.6914	13.0596	0.93741	0.92454
14.6539	13.223	0.67616	0.88479
13.0012	12.5722	0.60835	0.93085
11.2422	10.8566	0.55271	0.95304
9.62159	8.11648	0.33379	0.89278
7.96025	4.84665	0.23945	0.76034
7.66615	2.76401	0.19458	0.60801
9.90959	4.73474	0.25021	0.50085
12.218	7.93444	0.45889	0.46514
13.1207	10.7231	0.60364	0.47726
12.7785	12.2678	0.59789	0.51171
11.8081	12.2433	0.60042	0.5549
10.799	11.1253	0.5368	0.59159
10.0637	9.73688	0.46364	0.61627
9.55899	8.6828	0.51497	0.64016
9.19441	8.20407	0.48749	0.67023
8.97346	8.25431	0.16914	0.70402
8.94231	8.63302	0.27925	0.74326
9.10465	9.12901	0.22813	0.7902
9.4579	9.61239	0.37588	0.83493
9.92816	10.0312	0.43105	0.85974
10.4101	10.3769	0.41875	0.85869
10.865	10.6568	0.34873	0.84185
11.1075	10.8696	0.2463	0.82182
11.1472	11.0064	0.2297	0.80611
11.234	11.0548	0.27822	0.79723
11.3674	11.0057	0.26441	0.79291
11.2825	10.8653	0.11061	0.78828
10.8472	10.6299	0.11883	0.78061
10.1482	10.2617	0.12969	0.77211
9.27859	9.71762	0.12395	0.76692
8.20784	8.99624	0.15612	0.76558
6.82595	8.14728	0.13252	0.76363
4.9739	7.2353	0.14997	0.7568
3.2794	6.40305	0.26051	0.74734
3.07699	6.06219	0.36121	0.74196
4.19215	6.65987	0.20272	0.74267
6.01711	8.13809	0.32564	0.74256
8.8972	10.2343	0.41241	0.73535
12.7484	12.8031	0.24808	0.72918
15.4955	15.4901	0.20971	0.73754
16.6592	17.5888	0.27907	0.753
18.3674	18.4146	0.605	0.77734
20.0474	17.6875	1.51053	0.99508
19.691	16.0151	3.35682	1.77935
17.5727	14.7921	6.17693	3.32347
14.6892	13.9119	9.41228	5.63586
11.5178	11.7603	12.4629	8.38529
8.16359	8.1624	14.965	11.0034
5.10263	4.43581	16.8649	13.1363
2.75735	1.84506	18.1984	14.7052
1.05484	1.06299	18.8616	15.6765
0.63548	1.19782	18.7694	16.035
1.37229	1.26569	17.9178	15.7799
1.73692	1.30585	16.4484	14.8558
1.75177	1.29294	14.5757	13.2006
1.50864	1.16121	12.5037	10.8652
1.07877	0.91416	10.424	8.08078
0.63127	0.6339	8.82524	5.27164
0.47271	0.43553	9.60081	4.10466
0.39663	0.36688	12.6043	6.63769
0.17886	0.37303	15.2797	10.1791
0.16655	0.39711	16.4789	12.8179
0.20635	0.42117	16.1512	13.8097
0.26502	0.43949	14.8233	13.1247
0.296	0.44672	13.1983	11.4236
0.24015	0.44764	11.6962	9.63239
0.20475	0.45153	10.3725	8.40513
0.29569	0.46071	9.29541	7.97611
0.35978	0.47297	8.6758	8.16518
0.24436	0.48955	8.51149	8.58615
0.04085	0.51508	8.61974	8.98222
0.17987	0.54943	8.87131	9.30259
0.19952	0.5886	9.1566	9.59651
0.28684	0.63137	9.3213	9.88064
0.33728	0.67551	9.48474	10.1141
0.20156	0.70822	9.74176	10.2566
0.12222	0.70782	9.95201	10.299
0.47948	0.66174	10.0551	10.253
0.59591	0.58109	9.90767	10.1336
0.19476	0.49356	9.54895	9.95638
0.73627	0.42447	9.11803	9.7234
0.6482	0.38536	8.58274	9.41184
0.07803	0.37447	7.92086	8.99276
0.35466	0.38385	7.02557	8.429
0.31185	0.40565	5.89924	7.6803
0.17512	0.43504	4.71307	6.79254
0.17383	0.47033	3.68535	5.98178
0.16565	0.50877	3.27351	5.66317
0.07883	0.54017	4.75955	6.44733
0.14407	0.55042	8.34147	8.90055
0.06936	0.53932	12.6959	13.0498
0.20501	0.53285	16.1179	18.0849
0.05937	0.55727	18.801	22.3742
0.106	0.58037	21.0827	24.138
0.3275	0.50506	21.1803	22.7647
1.11517	0.43867	19.2526	19.2571
2.81765	1.20073	16.1972	14.9117
5.14322	2.67338	12.6677	10.4843
7.18348	4.46448	9.14207	6.6607
8.69248	6.16199	5.94187	3.87167
9.92622	7.54549	3.33185	2.15258
11.0703	8.61873	1.4361	1.3711
12.2878	9.46104	0.89641	1.05792
13.5367	10.1911	1.22753	0.94839
14.6445	10.9487	1.64192	1.00405
15.5785	11.8174	1.75537	1.02216
16.1537	12.7228	1.47712	0.93126
16.0753	13.4098	1.14596	0.82535
15.1514	13.5834	0.89632	0.82748
13.4212	12.9913	0.68958	0.90173
11.3646	11.4556	0.56083	0.92915
8.97426	9.0291	0.50473	0.86805
6.39894	5.95228	0.29571	0.73937
6.37785	2.7525	0.38734	0.59618
8.59385	3.1384	0.65971	0.49719
10.1648	6.32942	0.62166	0.4665
10.5496	8.74521	0.57526	0.48751
10.1167	9.75262	0.52208	0.53418
9.4358	9.48878	0.46563	0.58556
8.87377	8.63071	0.47018	0.6249
8.63876	7.9401	0.35401	0.65095
8.8147	7.77128	0.18787	0.67732
9.09634	8.04424	0.05383	0.70914
9.22255	8.53699	0.12186	0.74315
9.32671	9.08096	0.04071	0.78367
9.63742	9.57551	0.19532	0.83518
10.1677	9.99268	0.23518	0.88704
10.6998	10.3497	0.31466	0.91952
11.0713	10.6444	0.40467	0.92557
11.3313	10.8482	0.40409	0.91459
11.4756	10.9355	0.35244	0.89709
11.4357	10.9046	0.2278	0.8765
11.4163	10.7835	0.11153	0.85229
11.3983	10.6154	0.15211	0.82509
11.2271	10.4384	0.23373	0.79752
10.9414	10.2655	0.17698	0.77264
10.4722	10.0744	0.09836	0.75465
9.78513	9.81897	0.17208	0.74805
8.86894	9.42764	0.19891	0.75305
[truncated: 4,003 more rows]

## Sheet: Participant 2
Resultant linear accelerations
Left shoe		Right shoe
Motion capture system	Shoe-type IMU	Motion capture system	Shoe-type IMU
20.115	9.71175	7.39112	1.65014
32.1423	8.84901	11.8323	1.85627
35.7654	7.69651	13.2203	1.95415
33.7854	6.50356	12.5004	1.90114
28.3021	6.1234	10.5353	1.72844
20.9478	6.9336	8.28906	1.49757
13.1875	8.42714	6.20104	1.29595
6.29383	10.3557	4.27422	1.20836
4.83397	12.9206	2.65277	1.23944
10.6199	16.3386	1.39474	1.31758
18.8652	20.7415	0.54275	1.38889
27.7098	26.2391	0.86467	1.4865
34.0358	32.4831	1.7002	1.69754
36.7611	37.8362	2.7928	2.09061
36.2128	39.9759	4.02287	2.68351
32.5367	37.8568	5.34267	3.49312
26.8549	31.9736	6.89509	4.62652
20.9726	23.424	8.79067	6.2138
15.6271	14.1967	11.1545	8.24452
10.7944	6.97664	13.9093	10.5201
6.74817	3.49599	16.5863	12.7983
3.83136	2.62395	18.7466	14.9255
2.07859	1.86727	20.1229	16.694
1.61863	0.95122	20.5458	17.7896
1.75489	0.53487	20.1775	18.0644
1.95952	0.6901	19.4729	17.5827
2.30156	0.75122	18.8437	16.3858
2.41228	0.68808	17.9919	14.4457
2.00518	0.5699	15.5477	11.9094
1.26038	0.47597	13.9275	10.2044
0.59518	0.53059	16.8405	12.3338
0.30737	0.67386	20.2644	17.2692
0.33959	0.76154	22.1537	21.5265
0.35097	0.7585	22.5752	23.069
0.18684	0.69525	22.1112	21.5891
0.16454	0.61883	21.3774	18.4511
0.24744	0.55993	20.5748	15.6396
0.30474	0.52152	19.7962	14.1969
0.32547	0.50107	19.0837	13.7705
0.30638	0.50274	18.2766	13.5084
0.35853	0.54936	17.2539	12.9718
0.66421	0.69856	16.0221	12.1732
1.21571	0.97926	14.5577	11.1586
1.72919	1.32387	12.9691	9.86578
1.95195	1.62095	11.2213	8.13062
1.98279	1.79987	8.93259	5.73173
1.91725	1.84765	5.95613	2.83395
1.78577	1.78496	2.96995	2.78436
1.80699	1.6677	3.72709	6.48358
1.88399	1.57397	7.87254	10.6244
1.90132	1.56373	12.658	15.1111
2.07277	1.66531	17.7515	20.1907
2.42176	1.87915	23.9796	25.9281
2.91407	2.19679	30.8518	32.1311
3.66023	2.65444	35.3254	37.8339
4.77874	3.35803	35.3175	41.2803
6.25444	4.40683	31.4699	40.9635
7.96893	5.7959	25.9673	36.2293
9.88468	7.41185	20.4589	27.5957
12.0372	9.15666	15.5418	17.4639
14.3549	11.053	11.3127	9.29134
16.5381	13.1027	7.75664	5.03648
18.2635	15.1121	4.98766	3.47513
19.3994	16.7405	3.20975	2.36139
19.8622	17.6432	2.08665	1.24843
19.474	17.6073	1.64604	0.56311
18.4469	16.6107	2.01455	0.59957
17.166	14.8236	2.24545	0.69998
15.7278	12.6973	2.19376	0.67666
15.2484	11.2222	1.79937	0.60692
17.2542	12.2341	1.27072	0.55522
20.5974	16.1153	0.808	0.54388
23.1317	20.496	0.54572	0.57156
24.2073	23.317	0.45814	0.62009
24.3061	23.7788	0.42275	0.67446
23.7068	21.9799	0.44087	0.73031
22.5317	18.7926	0.52486	0.777
21.0301	15.4977	0.51686	0.80779
19.3138	13.1156	0.54751	0.82696
17.5865	11.7635	0.81387	0.84596
16.0076	10.7587	1.05295	0.89424
14.4329	9.56015	1.16322	1.01223
12.7455	8.09954	1.28161	1.20583
10.8952	6.56479	1.45665	1.40564
9.0944	5.31553	1.48483	1.51152
7.7141	4.94602	1.31767	1.49093
6.86622	5.67723	1.12712	1.3941
6.26828	6.68885	1.01198	1.28569
5.75484	7.28766	0.93505	1.20497
5.5735	7.53549	0.84413	1.16705
6.32531	7.97122	0.73612	1.17077
8.14033	9.28874	0.67161	1.2083
11.8382	12.1943	0.75861	1.27392
18.6786	17.3405	1.08364	1.38163
26.6999	24.8726	1.71203	1.59033
32.4496	33.6576	2.52896	2.01165
34.7804	40.9331	3.49492	2.74378
33.2865	43.2927	4.71774	3.77427
28.7337	39.0385	6.18837	4.98354
23.3162	29.6858	7.87919	6.27309
18.1824	18.8554	9.94147	7.67682
13.4583	10.1278	12.3537	9.27293
9.18362	5.64922	14.8149	11.0968
5.60388	4.13855	17.0929	13.1655
2.89613	2.78722	19.0089	15.3386
1.53212	1.34288	20.369	17.2378
1.67381	0.64043	20.9129	18.4726
1.58574	0.85144	20.4833	18.8025
1.62206	0.88107	19.5594	18.1333
1.87416	0.67431	18.4171	16.5027
1.7833	0.43722	16.3927	14.0392
1.35352	0.37489	14.3166	11.4331
0.79043	0.44796	15.1986	11.0288
0.67392	0.50607	17.6325	14.1569
0.81643	0.52821	19.1086	18.0447
0.61325	0.53201	19.5233	19.965
0.28895	0.54268	19.3197	19.0876
0.42072	0.59692	18.7303	16.4181
0.76755	0.7262	17.9827	13.7043
1.21154	0.9487	17.3695	12.0989
1.59987	1.25814	16.9209	11.7294
1.72795	1.60001	16.5926	12.0707
1.87738	1.88737	16.3957	12.5436
2.1958	2.05839	16.2071	12.8341
2.37394	2.09316	15.9591	12.8402
2.32383	1.99653	15.5438	12.5384
2.11423	1.80432	14.8632	11.8674
1.73077	1.5774	13.8704	10.6955
1.39508	1.37598	12.3431	8.92917
1.1915	1.2566	10.1363	6.62836
1.16919	1.25099	7.14319	4.00551
1.27881	1.33872	3.60079	1.67101
1.36953	1.48687	1.26114	3.79276
1.58221	1.68229	5.76374	8.75017
1.87905	1.9112	11.376	15.1726
2.27172	2.16028	17.8568	22.7296
2.9159	2.46553	25.8681	31.1217
3.87654	2.92214	33.8631	39.8121
5.19053	3.62572	38.2847	46.9995
6.94623	4.62132	37.5999	49.7022
9.13001	5.97312	33.0818	45.9582
11.5741	7.82868	26.988	36.5378
14.1703	10.2331	21.0278	24.4259
16.7356	12.9381	15.6941	13.416
18.9587	15.4977	10.9753	6.80333
20.6505	17.5131	7.05856	4.86054
21.5974	18.7988	4.16139	3.90487
21.5755	19.2785	2.43387	2.60503
20.6045	18.8307	1.98003	1.36777
19.0137	17.3658	2.06849	0.52633
17.0845	14.9353	2.10798	0.33927
15.8699	12.2984	2.12132	0.46514
17.2176	12.0853	1.95794	0.50183
19.9221	15.7278	1.48629	0.488
21.7459	20.237	0.99242	0.51042
22.2503	22.745	0.79271	0.59436
22.0652	22.4029	0.75358	0.69029
21.8501	20.1863	0.69129	0.75719
21.7407	17.6124	0.58538	0.78563
21.4596	15.5976	0.5032	0.80857
20.8036	14.4357	0.69398	0.89435
19.9071	14.0337	1.17105	1.09491
19.1285	14.0242	1.65956	1.39386
18.5264	13.9805	2.05167	1.73182
17.8259	13.6671	2.32386	2.06554
16.8861	13.0585	2.51092	2.345
15.8148	12.2063	2.59321	2.48411
14.6982	11.1952	2.4591	2.42856
13.2129	10.0759	2.06599	2.19682
11.096	8.82973	1.49026	1.8663
8.58542	7.55392	0.90564	1.59213
6.71132	7.15592	0.57558	1.53016
8.13588	9.53673	0.48715	1.63614
12.2993	14.7579	0.44965	1.74396
18.6701	21.5417	0.48221	1.76377
27.3761	29.0731	0.64996	1.70512
35.3162	36.7741	0.99663	1.65558
40.0116	43.2833	1.80124	1.82538
41.0945	46.5455	3.08425	2.45692
38.0335	45.3394	4.64626	3.52377
32.0713	39.5411	6.31189	4.81182
25.5363	29.8774	8.07514	6.16909
19.4694	18.886	10.1384	7.61806
14.0907	10.3031	12.6928	9.26075
9.56691	6.08236	15.4497	11.1827
6.11793	4.4153	17.9675	13.4201
3.69529	3.02475	19.9667	15.77
2.24261	1.66765	21.1522	17.7627
2.02282	0.79625	21.3737	18.9769
2.20164	0.68974	20.7787	19.1912
2.22605	0.8076	19.8765	18.3083
2.00367	0.85815	18.5408	16.3367
1.7326	0.83993	15.821	13.4636
1.4164	0.73979	14.3148	10.8731
0.92544	0.57112	16.6903	11.6417
0.54794	0.46601	19.1306	15.7372
0.48511	0.51572	20.0824	19.5803
0.41187	0.58575	20.0462	20.9457
0.24191	0.59993	19.5057	19.4412
0.05349	0.57031	18.7223	16.2891
0.16399	0.52788	17.9289	13.3323
0.21527	0.4969	17.2344	11.7022
0.38579	0.48912	16.6168	11.3892
0.5893	0.52011	16.1808	11.732
0.67871	0.63666	15.8729	12.0933
1.04767	0.87541	15.4906	12.1304
1.48419	1.19127	14.9416	11.6976
1.70146	1.49179	14.0439	10.7591
1.84038	1.69848	12.7422	9.40091
1.93843	1.78759	11.1278	7.83785
1.92484	1.78864	9.27011	6.3144
1.89902	1.74535	7.11555	5.10022
1.93618	1.69062	4.62878	4.75494
2.02217	1.64545	3.27789	5.87687
2.06517	1.62313	5.65387	8.62211
1.98906	1.63781	9.70136	13.009
1.93894	1.70848	14.7537	18.8447
2.18694	1.86058	21.3378	25.6524
2.80203	2.16131	28.8765	32.8849
3.85861	2.76414	33.9954	39.806
5.31677	3.8284	34.4507	44.6567
7.15036	5.35696	31.0211	44.7753
9.30834	7.18847	26.3363	38.8522
11.6901	9.17923	21.879	28.793
14.2756	11.3387	17.7729	18.5313
16.8192	13.658	13.7796	11.2537
18.8996	15.9102	9.95329	7.55728
20.3354	17.7265	6.54088	5.45786
21.0835	18.7694	3.79497	3.4778
20.9944	18.855	2.10167	1.70002
20.1205	17.9705	1.70571	0.53108
18.9133	16.2423	1.83084	0.54018
17.5385	14.0335	2.18455	0.75341
16.2511	12.1848	2.31657	0.72037
16.6537	12.3642	1.69506	0.5809
19.2466	15.2976	0.90205	0.52048
21.9072	18.9368	0.54769	0.64433
23.2058	21.3274	0.49875	0.81124
23.2471	21.8075	0.47031	0.90622
22.595	20.4088	0.46598	0.92983
21.5468	17.8055	0.5892	0.93193
20.1427	15.0559	0.92211	0.98029
18.6724	12.8999	1.55025	1.14445
17.5831	11.7037	2.01326	1.44014
16.7605	11.4142	2.1411	1.77292
16.0333	11.4854	2.01452	1.98905
15.3047	11.3719	1.74152	1.99838
14.4111	10.7998	1.43302	1.81524
13.2591	9.7242	1.12848	1.52949
11.7388	8.27576	0.89565	1.29272
9.9926	6.6963	0.65083	1.21187
8.0369	5.1928	0.44073	1.23157
5.72835	4.03655	0.33606	1.26072
3.46631	4.14597	0.19154	1.27212
3.67191	6.00943	0.17308	1.28043
6.7054	8.88609	0.31773	1.29784
10.5948	12.6395	0.47573	1.32071
16.3244	17.9227	0.65705	1.3555
24.5412	25.3201	1.01907	1.43992
32.3203	34.1789	1.68998	1.65921
36.6611	41.9863	2.6109	2.12824
36.7819	45.3279	3.76502	2.89568
33.0675	42.2481	5.19167	3.89387
27.1447	33.6789	6.90508	5.04974
21.2823	22.6359	8.98787	6.39576
16.4733	12.7837	11.4667	7.99924
12.0939	7.1948	14.1748	9.91645
8.02484	5.3945	16.7685	12.2149
4.78503	3.95374	18.9486	14.7779
2.73019	2.12684	20.6542	17.1793
1.99375	0.73288	21.4862	18.9071
1.86688	0.89851	21.1848	19.569
1.89746	1.12945	20.3936	18.9699
1.97569	0.97998	19.5695	17.1881
1.87302	0.71641	18.2662	14.6694
1.65163	0.58372	15.9856	12.3722
1.27554	0.59783	15.0565	11.8051
0.85296	0.63136	17.1176	14.1486
0.67184	0.65375	19.4154	18.1336
0.59666	0.65862	20.7477	20.9584
0.42691	0.63143	21.2005	21.0904
0.23304	0.59516	20.9361	19.1167
0.42616	0.59804	20.3254	16.5617
0.83414	0.674	19.6942	14.6035
1.30886	0.83422	19.2138	13.7267
1.65414	1.08411	18.9526	13.7781
1.7488	1.38503	18.8034	14.2452
1.74893	1.64152	18.5478	14.6045
1.8106	1.77555	18.0401	14.5107
1.85887	1.76719	17.2674	13.829
1.71797	1.64042	16.2496	12.6047
1.43895	1.45305	15.2121	11.0244
1.11186	1.27786	13.8062	9.24838
0.92445	1.1676	11.2574	7.25438
0.96318	1.1398	7.68279	4.97161
1.00134	1.18693	3.75126	2.72097
1.09246	1.2888	2.48219	4.01707
1.23377	1.42574	7.01232	9.16957
1.44116	1.59469	12.9531	15.8318
1.88176	1.81822	19.3691	23.1671
2.56315	2.15501	26.305	30.7047
3.47756	2.68623	33.6949	38.181
4.70467	3.46278	39.2617	44.6631
6.26111	4.47969	40.5127	48.2399
8.04821	5.76574	37.1668	47.2016
10.2256	7.4592	31.3332	41.0394
12.7817	9.64296	24.9509	30.7599
15.3397	12.1404	18.7224	19.2267
17.6554	14.5614	13.1999	10.1151
19.4264	16.5299	8.61487	5.34601
20.4629	17.867	5.09068	3.59129
20.7581	18.517	2.96443	2.4922
20.3742	18.4207	2.08017	1.47233
19.4774	17.5541	1.89492	0.77816
18.1971	15.9059	1.95018	0.53915
16.8827	13.7099	2.0448	0.52257
16.546	12.3054	1.97443	0.54452
17.6426	13.6419	1.61968	0.58641
19.1414	16.8852	1.14051	0.646
20.1974	19.3993	0.711	0.71702
20.6806	19.9443	0.4308	0.78628
20.6849	18.9462	0.44257	0.81973
20.3746	17.214	0.48022	0.79464
19.6321	15.1674	0.41211	0.73833
18.4336	13.1177	0.37005	0.70297
17.2063	11.591	0.47391	0.70986
16.2535	11.1788	0.56784	0.73351
15.6158	11.6945	0.52305	0.73604
15.3165	12.3146	0.37619	0.70588
15.2732	12.5762	0.23057	0.66292
15.2537	12.4486	0.20118	0.64024
14.8962	11.9998	0.20936	0.65524
13.9798	11.199	0.19949	0.68094
12.5884	9.93988	0.21989	0.68607
10.7628	8.27664	0.31587	0.68818
8.39511	6.64944	0.42976	0.73023
5.8765	5.83479	0.56854	0.8202
4.3919	6.28997	0.74579	0.9298
5.22019	7.95005	0.93871	1.03974
8.08561	10.9333	1.11891	1.15326
13.1742	15.3656	1.32522	1.29394
21.2821	21.0955	1.70979	1.51168
30.0345	27.795	2.3272	1.86021
35.7425	34.6834	3.03074	2.35614
37.6984	39.7639	3.9088	2.98523
35.7848	40.5937	5.17204	3.75628
30.5855	36.5885	6.73802	4.71312
24.4455	29.1954	8.46101	5.87526
18.9746	20.2333	10.5298	7.29427
14.1689	11.7188	13.0764	9.14511
9.7426	5.87863	15.8221	11.5371
5.87694	3.4368	18.4056	14.2867
3.23637	2.41577	20.6085	16.9389
2.03816	1.39964	22.2845	18.9872
1.74854	0.69534	23.0068	20.134
1.74534	0.80339	22.6388	20.2954
1.82286	0.89791	21.6724	19.5016
1.90209	0.75138	20.5686	17.9702
1.83306	0.51469	19.3429	16.0667
1.52125	0.39114	17.5699	14.3133
1.0784	0.46541	16.6478	13.607
0.96161	0.57162	18.7141	14.6271
0.9763	0.62431	21.4699	17.0643
0.77972	0.61723	22.6901	19.5626
0.53345	0.57119	22.5173	20.3211
0.41565	0.52104	21.5372	18.8247
0.35762	0.50267	20.2004	16.1088
0.45648	0.52972	18.8148	13.386
0.65992	0.59818	17.5329	11.5205
0.67367	0.71453	16.5907	10.9051
0.70405	0.88283	16.0566	11.1865
0.8775	1.06789	15.8233	11.7918
1.0147	1.20429	15.7196	12.3503
1.11881	1.25488	15.4455	12.6342
1.079	1.23808	14.9166	12.4729
0.99289	1.19938	14.1242	11.7623
1.04267	1.17893	12.7591	10.5064
1.15864	1.19687	10.7305	8.7309
1.16903	1.24435	8.2013	6.54205
1.18126	1.29809	5.16899	4.91586
1.30237	1.3496	2.95134	6.00875
1.40647	1.41955	5.0481	9.15483
1.57181	1.54031	9.12465	12.7716
1.8854	1.71349	13.7485	16.5938
2.17957	1.90999	18.4857	20.7349
2.51616	2.11942	23.245	25.2005
3.00115	2.37999	28.2186	29.8948
3.61526	2.75471	32.0769	34.2898
4.44798	3.28493	32.8816	37.2488
5.63892	3.98553	30.4124	37.5239
7.16828	4.9134	26.1103	34.185
8.95104	6.20227	21.4722	27.2455
10.9867	7.93376	17.0883	18.5312
13.1891	9.99286	13.0789	10.9521
15.3031	12.0924	9.42156	6.30099
17.1874	13.9569	6.22887	4.06597
18.7334	15.4918	3.72559	2.63821
19.7051	16.6852	2.17114	1.39243
19.9099	17.4335	1.66427	0.65112
19.4356	17.564	1.83253	0.68298
18.6035	16.8678	2.15617	0.74799
17.6945	15.2138	2.17815	0.61356
16.9319	13.0952	1.64263	0.36509
16.9686	12.3089	1.03739	0.22839
18.6001	14.2531	0.62903	0.4326
20.7129	17.2105	0.329	0.68306
21.7651	19.2311	0.21782	0.84136
21.7582	19.8251	0.26452	0.87566
21.3292	19.2301	0.36199	0.83735
20.7838	18.0056	0.55679	0.81039
20.1307	16.4646	0.81059	0.84314
19.2402	14.4579	1.13983	0.94601
18.1862	12.3527	1.43326	1.12301
17.2789	11.2601	1.54275	1.34904
16.7096	11.6657	1.59379	1.55826
16.5221	12.7326	1.71325	1.69549
16.6817	13.5987	1.78609	1.73849
17.0734	13.9857	1.65854	1.68576
17.1974	13.9004	1.39878	1.57163
16.7018	13.3964	1.16809	1.46314
15.5532	12.4182	1.05614	1.41553
13.6337	10.8286	1.11622	1.44379
11.0608	8.74313	1.24258	1.52447
8.22496	6.90804	1.33548	1.61908
5.78997	6.80935	1.38648	1.69728
6.04782	9.12862	1.38123	1.74934
11.1581	13.2878	1.38379	1.78905
20.3147	19.0348	1.58697	1.84883
30.3516	26.349	1.97889	1.98068
37.6971	34.9032	2.49328	2.25768
41.5327	43.0613	3.25985	2.74647
41.8148	48.1726	4.31751	3.45167
38.3333	48.4565	5.68083	4.34411
32.2448	43.397	7.36044	5.4385
25.8356	33.5626	9.20665	6.74795
20.0703	21.6249	11.1462	8.26572
14.7459	11.6633	13.2272	10.0208
10.0016	6.32229	15.2558	11.9624
6.09308	4.49108	16.8716	13.847
3.37315	3.17831	17.7924	15.3473
2.15748	1.75461	17.9881	16.2008
2.09476	0.97778	17.6832	16.2959
2.25469	1.05179	17.1693	15.6295
2.37184	1.07563	16.4953	14.1138
2.17325	0.87688	15.0045	11.7118
1.74773	0.57125	13.7706	9.61547
1.31125	0.36956	15.4185	11.1184
0.87555	0.50501	18.0481	15.6674
0.47464	0.71342	19.6316	19.2728
0.42521	0.86137	20.0878	20.1236
0.7402	1.00634	19.7946	18.7628
1.06108	1.19781	19.0779	16.5044
1.42691	1.40543	18.2015	14.2246
1.81664	1.57642	17.2919	12.4696
1.97095	1.68552	16.4612	11.6183
1.82946	1.73236	15.8575	11.5235
1.67041	1.72244	15.4224	11.6591
1.67112	1.66516	14.9973	11.627
1.66318	1.57382	14.4078	11.2957
1.48773	1.46372	13.6909	10.6789
1.1992	1.35881	12.8969	9.8125
0.84733	1.28418	11.6488	8.66879
0.53308	1.25166	9.66312	7.21652
0.41673	1.2619	7.22198	5.69027
0.48696	1.30779	4.72801	4.87235
0.55132	1.37306	3.52438	6.11813
0.49971	1.43987	5.92217	9.55809
0.44856	1.50286	9.85193	14.1461
0.40866	1.56724	14.1962	19.1014
0.41286	1.64246	18.9123	24.1411
0.73997	1.75589	24.6362	29.2583
1.38619	1.97043	30.3367	34.0224
2.27066	2.34392	33.1917	37.2827
3.31785	2.88307	32.019	37.7525
4.61139	3.60379	27.916	34.5193
6.30564	4.54334	23.1638	27.6808
8.3363	5.75924	18.9343	19.3516
10.6054	7.38241	15.1786	12.7788
13.049	9.4949	11.8526	9.25926
15.4178	11.9323	9.1145	7.37348
17.4888	14.282	6.65116	5.7701
19.0116	16.0911	4.13317	4.09577
19.6477	17.1103	2.72836	2.4736
19.396	17.3004	2.10832	1.18293
18.3981	16.7183	1.80923	0.45703
17.0568	15.4865	1.83952	0.38343
15.8492	13.6541	1.79063	0.39838
14.8482	11.4339	1.49583	0.33366
15.4044	10.6053	1.08757	0.31936
18.4675	13.8005	0.73048	0.41795
21.7582	19.1557	0.55684	0.5635
23.6227	23.1321	0.44825	0.69555
24.0591	24.1391	0.62007	0.81004
23.6985	22.6187	0.87374	0.9469
22.9743	19.791	1.09071	1.15073
21.9423	16.7245	1.75248	1.44306
20.6994	14.1989	2.40019	1.81845
19.5105	12.6224	2.82953	2.24353
18.4638	11.9106	2.96539	2.62499
17.4671	11.5581	2.89748	2.83422
16.3745	11.1166	2.7624	2.8117
15.1416	10.4899	2.6073	2.59172
13.8779	9.74244	2.29836	2.24665
12.6739	8.97916	1.74719	1.87795
11.4311	8.34048	1.17381	1.60512
9.83254	7.80568	0.79516	1.48782
7.75374	7.15054	0.61637	1.48993
6.0971	7.10583	0.63398	1.54706
8.2054	10.4213	0.64111	1.61441
14.5536	17.6165	0.57685	1.66351
23.8975	26.7677	0.76319	1.69214
33.8067	35.9958	1.24224	1.75997
40.4258	43.5922	2.11674	2.02056
41.7808	47.2678	3.536	2.64301
38.1323	44.9031	5.42192	3.71605
31.7318	37.1255	7.67894	5.29023
25.1273	27.0532	10.1464	7.27893
19.0862	17.3591	12.7029	9.46153
13.6571	9.64111	15.1547	11.6773
9.22706	5.06871	17.0841	13.7545
5.8667	3.20213	18.2239	15.4031
3.55137	2.15935	18.4488	16.3861
2.32109	1.27907	18.0607	16.6148
1.98	0.78537	17.6188	16.0802
2.06399	0.76333	17.0295	14.801
2.30917	0.82854	15.7385	12.7447
2.39891	0.8145	13.7534	10.0937
2.0767	0.73967	13.1347	8.46876
1.40181	0.66153	14.8102	10.5065
0.77288	0.6346	16.8168	14.4892
0.56404	0.66942	18.0173	17.2731
0.67286	0.7374	18.3941	17.6996
0.7825	0.81307	18.2536	16.3627
0.85143	0.90239	17.7602	14.4302
0.99613	1.02613	17.1589	12.7152
1.30729	1.18891	16.6564	11.6788
1.69177	1.36476	16.1941	11.4229
1.86953	1.50844	15.8194	11.5877
1.78779	1.5935	15.5315	11.7358
1.63593	1.62491	15.1345	11.6471
1.62599	1.62314	14.7955	11.2988
1.74659	1.6109	14.5714	10.7637
1.74592	1.5994	14.0707	10.1093
1.65335	1.5905	13.2472	9.3148
1.57258	1.59175	12.1813	8.29011
1.5117	1.61537	10.5706	6.98489
1.53801	1.66641	8.32878	5.37171
1.63799	1.73727	5.78679	3.66309
1.78584	1.81477	3.58426	3.78743
1.88916	1.89367	4.2942	6.97876
1.9506	1.98211	8.17671	11.5293
2.06385	2.09413	13.5114	17.0122
2.38342	2.24851	20.4744	23.6857
3.11472	2.49861	29.0231	31.4148
4.22758	2.99181	36.8954	39.2002
5.75596	3.9702	40.5922	45.3448
7.72904	5.58828	39.0113	47.3071
10.0325	7.73212	33.9457	42.9642
12.5781	10.0698	27.4509	33.3869
15.0471	12.282	20.8141	22.378
17.1687	14.2486	14.6651	12.9497
18.8846	15.9168	9.10011	6.25862
19.9649	17.1318	4.44884	2.83138
20.1464	17.7335	1.22409	2.02033
19.6309	17.6376	1.08154	1.60406
18.6619	16.8294	1.76497	1.08584
17.3847	15.4355	2.03892	0.63898
16.1154	13.7623	2.2274	0.3333
15.7262	12.5009	2.10708	0.25596
17.1639	13.052	1.67066	0.36562
19.6784	16.0584	1.15131	0.50012
21.9129	19.8807	0.72712	0.61478
23.2376	22.3824	0.51645	0.69722
23.5674	22.6289	0.45576	0.74633
23.0953	21.0214	0.43271	0.77723
22.0258	18.4015	0.36607	0.81686
20.5688	15.5342	0.51585	0.90891
19.0693	13.1535	1.06178	1.11792
17.8298	11.7406	1.72309	1.48434
16.9396	11.1988	2.26072	1.95313
16.2643	10.9473	2.68353	2.39679
15.4629	10.5129	2.8576	2.71193
14.2823	9.74847	2.72818	2.8404
12.897	8.62997	2.44458	2.73846
11.521	7.37226	2.05905	2.41767
10.0965	6.58096	1.60987	2.00973
8.45316	6.69689	1.19581	1.69682
6.98723	7.45044	0.82561	1.53617
7.37035	9.0486	0.59967	1.44852
10.9518	12.6531	0.71035	1.38554
16.7132	18.6276	0.94535	1.38696
23.8403	26.0879	1.22503	1.48515
32.0845	33.8934	1.57695	1.67203
38.693	40.9676	2.08159	1.96261
40.9052	45.6658	2.80957	2.38852
39.1565	46.1985	3.76468	2.94263
34.4014	42.3633	4.921	3.59596
28.4829	35.1704	6.20076	4.37854
22.7695	25.6236	7.80934	5.3778
17.3782	15.7314	9.95276	6.7255
12.4294	8.44528	12.5268	8.58873
8.17397	5.01047	15.0907	10.9941
5.14206	3.63956	17.3054	13.6724
3.68231	2.62951	18.9127	16.1416
2.97125	1.75562	19.6702	17.9379
2.42687	1.10653	19.8379	18.8308
2.15799	0.69736	19.6806	18.7679
2.0946	0.54156	19.0761	17.6075
1.95324	0.57667	17.1639	15.1982
1.63973	0.64302	14.6129	12.3303
1.20088	0.64846	15.2681	12.193
0.898	0.61406	18.1383	16.0739
0.74083	0.62235	20.0804	19.8731
0.62634	0.71283	20.7621	20.9537
0.74147	0.88614	20.7056	19.5038
0.98258	1.12994	20.2079	16.8937
1.24989	1.40442	19.4085	14.4075
1.72171	1.65975	18.437	12.8043
2.21109	1.86748	17.5346	12.1875
2.3878	2.01216	16.9394	12.1977
2.34644	2.07001	16.5912	12.4047
2.1847	2.02416	16.3187	12.5177
1.94482	1.88743	16.0001	12.3911
1.73365	1.70206	15.4635	11.9704
1.52817	1.52659	14.7478	11.248
1.28374	1.40646	13.6412	10.1877
1.04429	1.35167	11.7302	8.71356
0.95327	1.3533	9.18315	6.82595
1.03201	1.40031	6.08827	4.59491
1.1097	1.47653	2.44623	2.97667
1.12851	1.56728	2.76385	5.6295
1.15196	1.67696	7.65367	10.9744
1.31612	1.82913	13.413	17.3732
1.7853	2.04946	20.2648	24.5195
2.61047	2.36588	28.5062	32.3802
3.83188	2.86324	36.1961	40.171
5.50076	3.73059	40.1935	46.0451
7.54159	5.13511	39.2649	48.0241
9.90089	7.04325	34.4693	44.646
12.5166	9.25153	28.1296	35.7734
15.2564	11.5889	21.9486	23.9976
17.9446	14.0366	16.1723	13.631
20.2246	16.5222	10.8718	7.33126
21.8128	18.7259	6.43007	4.58844
22.5373	20.2006	3.13588	3.22544
22.2786	20.5238	1.62504	2.00731
21.1341	19.4382	2.00187	0.99521
19.6263	17.1286	2.2468	0.65894
18.2874	14.5999	2.17646	0.6642
17.7822	13.5907	2.03345	0.54496
18.7913	14.7754	1.73099	0.42219
20.5014	17.0827	1.39008	0.49236
21.8569	19.3319	0.97919	0.67375
22.5496	20.6404	0.63487	0.84006
22.6789	20.7619	0.6445	0.96121
22.3937	19.8642	0.7698	1.05903
21.7477	18.0544	1.08713	1.19208
20.7927	15.8126	1.61994	1.41653
19.8644	14.067	2.20082	1.7458
19.1292	13.3582	2.65869	2.12764
18.2864	13.2529	2.85893	2.45993
17.3032	12.9677	2.83327	2.65218
16.3388	12.1176	2.66172	2.66262
15.3403	10.8399	2.40423	2.5024
14.1926	9.68448	2.10771	2.22882
12.9055	9.1987	1.68696	1.89899
11.6793	9.4225	1.14069	1.55258
10.5269	9.90795	0.53109	1.28831
8.92823	10.062	0.27247	1.24715
7.11095	9.73223	0.63278	1.40595
6.84795	9.72389	0.82754	1.62163
9.12368	11.2637	0.94116	1.81368
13.2122	14.588	0.97061	1.94484
19.3926	19.3266	0.79685	1.97302
27.1736	25.419	0.47065	1.89836
33.5648	32.5237	0.87009	1.86495
36.6145	39.3221	1.8964	2.13092
37.0327	43.7046	3.13504	2.75768
34.8463	43.5001	4.65542	3.60774
30.0798	37.8731	6.49545	4.64563
24.7046	28.4615	8.62678	5.93233
19.8169	18.514	11.1097	7.56243
15.2977	11.0464	13.8842	9.68059
11.107	7.38463	16.6285	12.3108
7.41821	5.7028	19.0271	15.1702
4.66006	3.92855	20.8774	17.7459
2.9117	2.0398	21.973	19.5315
2.04781	0.77341	22.2247	20.2583
1.83315	0.94347	21.8391	19.8914
2.0642	1.21112	20.9871	18.4612
2.25775	1.13892	19.1685	16.0862
2.07426	0.8587	16.4485	13.3996
1.62695	0.56125	16.2742	12.7158
1.07137	0.46155	19.0116	15.8529
0.70017	0.55865	21.1816	19.7358
0.52367	0.67347	22.0019	21.444
0.3487	0.72452	21.8236	20.5876
0.32852	0.7057	21.1532	18.0177
0.37213	0.66796	20.2875	14.9597
0.5669	0.69276	19.2591	12.6243
1.03689	0.83906	18.2252	11.605
1.29061	1.08697	17.4795	11.6285
1.37531	1.365	16.9966	12.0044
1.60286	1.59825	16.4963	12.2096
1.82653	1.74256	15.897	12.0807
1.94465	1.78812	15.3259	11.6788
1.97418	1.743	14.7529	11.1028
1.87806	1.63299	13.9463	10.3565
1.55912	1.4911	12.713	9.33185
1.22551	1.34353	10.8009	7.9117
1.08599	1.22579	8.03692	6.00791
1.01159	1.17791	4.752	4.04549
0.96723	1.20306	3.00105	4.9965
0.99064	1.27139	5.96227	9.3992
1.05306	1.36543	11.0682	14.8269
1.2049	1.4919	16.9958	20.4776
1.53535	1.67303	23.365	26.3287
2.20192	1.95895	30.0274	32.2998
3.20993	2.42357	35.4512	37.7634
4.40217	3.11595	37.8765	41.6916
5.83093	4.03065	36.8847	42.635
7.57342	5.19214	32.9586	39.394
9.72007	6.73708	27.4026	32.5851
12.2708	8.7746	21.7874	24.2974
14.9441	11.1929	16.6499	16.1993
17.469	13.6798	11.8822	9.37775
19.6877	15.9309	7.69479	4.81496
21.2903	17.8042	4.46993	2.60768
22.0252	19.1804	2.43602	1.69889
21.7716	19.8217	1.83664	1.18469
20.6826	19.4942	2.03855	0.87779
19.1928	18.0238	2.2463	0.73351
17.7623	15.4883	2.12158	0.59158
17.2462	13.1228	1.79983	0.42166
18.3704	13.6531	1.52454	0.3756
20.2513	17.1861	1.17527	0.50053
21.848	20.5659	0.82611	0.64163
22.9537	22.0909	0.60286	0.73376
23.6086	22.0281	0.50484	0.7757
23.6887	20.9892	0.45513	0.77459
23.0546	19.1998	0.45852	0.74057
21.8302	16.8571	0.43529	0.69769
20.2601	14.4076	0.5	0.67371
18.6693	12.6544	0.44121	0.67814
17.3796	12.0799	0.33228	0.69972
16.4892	12.1893	0.29943	0.72893
15.9126	12.2965	0.40601	0.77587
15.5102	12.0872	0.72034	0.86445
14.9936	11.4719	1.0696	1.00895
13.9294	10.4727	1.27136	1.18727
12.1673	9.19021	1.31284	1.34893
9.91753	7.67487	1.25483	1.45899
7.21879	6.0796	1.26029	1.51765
4.40467	5.42942	1.36706	1.54342
3.68763	7.01802	1.43613	1.55307
6.60617	10.2023	1.43622	1.55465
10.8342	14.3844	1.44111	1.55666
17.0551	19.8838	1.4928	1.57958
25.4736	26.9473	1.6351	1.65151
32.8777	34.8258	1.96735	1.80282
36.733	41.5197	2.60913	2.09618
37.3379	44.5333	3.53926	2.66008
34.9898	42.6363	4.7445	3.61892
30.0662	36.8361	6.32543	4.96769
24.189	28.9927	8.30123	6.57526
18.5739	20.3478	10.6181	8.34273
13.5136	12.2695	13.2344	10.3059
9.26615	6.62092	15.968	12.4496
5.98377	4.00516	18.3692	14.5827
3.55999	2.77048	20.1531	16.4922
2.08051	1.62005	21.0865	17.9362
1.72173	0.66016	20.9759	18.6246
2.0025	0.69622	20.1643	18.4567
2.36532	0.98295	19.2504	17.5327
2.27869	0.99805	18.2492	15.9451
1.88315	0.82154	16.5438	13.8586
1.30497	0.57985	15.2474	11.8875
0.71169	0.43006	16.6615	11.7241
0.45301	0.4819	19.1044	14.3469
0.42527	0.59215	20.6061	17.5224
0.27656	0.63956	20.9885	19.1575
0.27478	0.61878	20.5545	18.8118
0.33464	0.56815	19.7115	16.9297
0.35093	0.52666	18.8698	14.4708
0.50132	0.51272	18.0846	12.5634
0.74114	0.52895	17.42	11.8312
0.73779	0.5845	17.0435	12.0694
0.61208	0.69217	16.8317	12.6351
0.57848	0.8386	16.5895	13.0447
0.78833	0.98106	16.1664	13.115
0.97787	1.08676	15.4495	12.7982
1.1173	1.14987	14.5065	12.082
1.18093	1.17591	13.3182	10.9057
1.09673	1.17259	11.6331	9.17341
1.00187	1.14988	9.27305	7.04984
1.09368	1.12307	6.51209	5.43279
1.25302	1.11373	4.22377	5.91937
1.27243	1.13776	5.07386	8.51395
1.20454	1.19649	8.9395	12.4153
1.17907	1.28725	13.6097	17.3839
1.39417	1.42226	18.5204	22.9818
1.84338	1.63295	23.6268	28.5513
2.33258	1.95223	28.6936	33.5509
2.98783	2.4029	32.2746	37.5529
3.97513	3.03585	33.2577	39.7262
5.25109	3.95973	31.3708	38.7142
6.81638	5.25496	27.4292	33.809
8.75735	6.87519	23.1561	26.1258
10.9895	8.6793	19.1289	18.0239
13.3771	10.5725	15.0796	11.6312
15.8252	12.5634	11.1076	7.79225
18.1521	14.5879	7.54994	5.54933
19.9938	16.4395	4.7017	3.72199
21.2031	17.9437	2.83718	2.15614
21.7091	18.9489	2.01397	1.01859
21.078	19.2245	1.96145	0.50495
19.5047	18.5485	2.17719	0.62895
17.8467	16.7495	2.12368	0.69776
16.428	13.9349	1.87112	0.57118
15.9608	11.4926	1.4307	0.34765
17.3081	12.296	0.79806	0.32897
19.2662	15.9331	0.38562	0.53919
20.6676	19.0813	0.3507	0.6952
21.4651	20.1836	0.36653	0.74609
21.8109	19.6032	0.41471	0.71731
21.8232	18.3015	0.47163	0.66231
21.5684	16.9122	0.54535	0.63505
21.0022	15.6687	0.59421	0.66199
20.2941	14.6906	0.7635	0.75075
19.6498	14.1646	1.02966	0.90755
19.0212	14.1136	1.22573	1.13336
18.4767	14.2281	1.4253	1.39164
18.0407	14.1249	1.67279	1.6071
17.408	13.5983	1.83489	1.72501
16.5324	12.6973	1.79721	1.74237
15.6149	11.6882	1.55646	1.68954
14.4596	10.8507	1.27472	1.60859
12.7735	10.1723	1.12333	1.53164
10.6595	9.46385	1.11282	1.46755
8.53781	8.89006	1.10333	1.41344
7.21682	9.15052	0.94367	1.37394
8.18694	10.9904	0.66827	1.36641
12.0039	14.7409	0.47956	1.40418
18.8352	20.6614	0.51576	1.48859
27.6273	28.7031	0.77287	1.62625
34.988	37.7066	1.30653	1.83911
38.9355	45.2025	2.00266	2.1424
39.7803	48.2816	2.77064	2.532
37.456	45.3658	3.6491	3.02277
32.1701	37.2026	4.74531	3.64746
25.6617	26.125	6.17226	4.46418
19.5032	15.1248	7.91035	5.61692
14.1057	7.13818	9.91323	7.25791
9.37237	3.89279	12.2138	9.35871
5.8691	3.49377	14.5869	11.646
3.7265	2.93959	16.6916	13.7826
2.45768	1.99332	18.3945	15.5895
1.94024	1.07359	19.5435	16.9546
1.87742	0.53649	19.8718	17.6619
2.12897	0.56312	19.4115	17.508
1.97459	0.67361	18.6939	16.4528
1.40569	0.6475	17.9074	14.6237
0.80374	0.51472	16.2293	12.3594
0.47269	0.38511	14.2923	10.5119
0.56927	0.41268	14.8944	10.9886
0.68615	0.52598	17.2822	14.2498
0.48952	0.5838	19.3125	17.6136
0.26422	0.57008	20.2824	19.118
0.26713	0.52316	20.182	18.6093
0.33078	0.47941	19.4356	16.7354
0.36515	0.45075	18.4725	14.3672
0.29736	0.43185	17.6082	12.4163
0.25922	0.42245	16.884	11.3834
0.28185	0.42961	16.1855	11.0982
0.28412	0.45078	15.5678	11.0336
0.2626	0.46853	15.0265	10.8398
0.17305	0.46829	14.4521	10.4816
0.13192	0.45809	13.854	10.007
0.18242	0.47446	13.2703	9.39733
0.27305	0.55458	12.4482	8.53746
0.63179	0.6968	11.0843	7.2496
0.99921	0.8826	9.15381	5.50513
1.35293	1.09177	6.62324	3.84946
1.52614	1.29444	3.82975	3.79774
1.61124	1.46458	2.07389	5.5604
1.72561	1.59724	4.27754	8.04479
1.93917	1.71633	8.31479	11.0547
2.32002	1.86498	12.8001	14.8035
2.6528	2.07751	17.5551	19.7954
2.98876	2.36726	23.3006	26.39
3.56464	2.76299	29.903	33.9937
4.34397	3.34398	34.7229	40.736
5.42035	4.19653	35.7629	44.2381
6.95901	5.34141	33.1215	43.2015
8.88155	6.73659	28.035	38.1371
11.0642	8.38483	22.1508	30.3608
13.4588	10.3784	16.517	21.0993
15.9577	12.7108	11.5246	12.0649
18.3459	15.1318	7.40865	5.4837
20.2939	17.2717	4.29525	2.63715
21.5806	18.8478	2.21349	2.00274
22.1145	19.7689	1.39788	1.36167
21.8037	20.0247	1.60019	0.69981
20.7526	19.4836	1.67599	0.52005
19.426	17.9705	1.66479	0.57222
18.202	15.7088	1.65601	0.53115
17.4485	13.8509	1.48108	0.50888
18.3259	14.026	1.18763	0.57115
20.6415	16.1281	0.87452	0.63852
22.6037	18.7531	0.60682	0.65501
23.5549	20.892	0.48901	0.62426
23.8174	21.7903	0.47715	0.57157
23.6293	21.283	0.40522	0.52282
23.0311	19.7365	0.30254	0.5011
22.0115	17.4657	0.28189	0.51821
20.62	14.9784	0.13169	0.56652
19.0614	13.1026	0.20225	0.62541
17.6579	12.2767	0.29325	0.67418
16.5477	12.0811	0.35953	0.69526
15.6926	11.8547	0.31341	0.67897
15.0383	11.2982	0.23512	0.6365
14.2706	10.4115	0.27271	0.58939
13.0561	9.25359	0.28234	0.54955
11.388	7.79988	0.28437	0.53135
9.4593	6.03903	0.38286	0.57426
7.43762	4.45893	0.66193	0.74002
5.61959	4.39948	1.14355	1.06214
4.87738	6.07847	1.65766	1.49574
6.14133	8.56762	2.00982	1.91662
9.1894	12.1149	2.14594	2.18241
14.7935	17.5185	2.19936	2.23822
23.1315	24.8001	2.2818	2.16083
31.1346	32.6517	2.43871	2.10165
36.2825	39.0964	2.76887	2.20463
38.387	42.555	3.34617	2.55925
37.2139	41.9039	4.2388	3.18136
32.8796	36.5919	5.4296	4.01511
26.7789	27.9597	6.8317	5.0047
20.6302	18.8846	8.47031	6.16802
15.2426	11.4441	10.5141	7.54933
10.5178	6.34063	12.9581	9.22297
6.51464	3.56093	15.6135	11.3423
3.59474	2.13798	18.2145	13.9285
2.12388	1.13667	20.4625	16.6524
1.92375	0.60581	22.2204	18.9678
1.98094	0.70126	22.993	20.3755
1.85653	0.78341	22.5681	20.6104
1.79489	0.68558	21.671	19.6545
1.84688	0.52352	20.627	17.6529
1.68823	0.41643	18.6145	15.002
1.44585	0.41063	15.925	12.7906
1.15074	0.45358	16.2613	13.3703
0.6915	0.48616	19.0688	17.1434
0.43187	0.4993	21.0717	20.7268
0.40337	0.49777	21.6906	21.7456
0.44811	0.48535	21.371	20.2542
0.49497	0.47133	20.56	17.4703
0.47126	0.46092	19.6348	14.6996
0.36047	0.44932	18.9321	12.9228
0.21776	0.43358	18.4626	12.4432
0.12327	0.42328	18.1634	12.853
0.11568	0.42477	17.9858	13.5041
0.242	0.43129	17.8867	13.9361
0.40502	0.44009	17.7291	13.9534
0.48712	0.45782	17.2568	13.5302
0.50668	0.49429	16.5454	12.738
0.50926	0.56163	15.628	11.6363
0.66662	0.69401	14.082	10.1927
0.9871	0.92111	11.791	8.34085
1.28438	1.2085	8.92667	5.92162
1.62362	1.48628	5.45558	2.79668
1.91013	1.70369	2.15854	3.16756
2.06921	1.85098	5.65019	8.61858
2.18853	1.94632	11.8344	14.9671
2.3483	2.01606	18.361	21.6893
2.58178	2.10017	25.7641	28.8093
2.93448	2.26512	33.6622	36.0188
3.45536	2.59206	39.2288	42.2262
4.21877	3.13878	40.8165	45.9661
5.29859	3.91105	38.569	45.5587
6.66974	4.88074	33.192	39.9215
8.25938	6.06469	26.4174	30.3821
10.0051	7.55241	19.8975	20.1623
11.9552	9.36849	14.1008	11.6762
14.1179	11.3637	9.15684	5.82296
16.3122	13.2877	5.39118	2.86642
18.1888	14.9356	2.84147	1.8824
19.4405	16.225	1.63095	1.24943
19.9788	17.0844	1.82576	0.71157
19.7896	17.3593	2.17003	0.56043
19.0157	16.9103	2.30085	0.63218
17.9107	15.6489	2.07649	0.63244
16.9405	13.6405	1.54792	0.56385
16.5889	11.6935	1.03319	0.50873
17.0471	11.6392	0.72985	0.53333
18.2695	13.8957	0.56399	0.61151
19.3263	16.4248	0.50162	0.67071
19.6904	17.8528	0.40402	0.6833
19.9987	18.2599	0.31228	0.65307
20.5957	18.1639	0.22953	0.5958
21.0584	17.8843	0.18509	0.54006
20.8942	17.3997	0.20245	0.51202
19.9444	16.2956	0.1765	0.51914
18.5352	14.4206	0.19177	0.55354
17.1442	12.3585	0.25138	0.60018
16.005	11.0015	0.2819	0.6417
15.4456	10.8986	0.26666	0.66132
15.5289	11.6254	0.21885	0.65195
15.6634	12.2618	0.20711	0.6222
15.4815	12.252	0.21829	0.58851
14.9944	11.5042	0.20166	0.56288
14.187	10.2819	0.15654	0.54944
13.0787	9.04002	0.14468	0.55118
11.6744	8.10317	0.30072	0.58051
9.79517	7.3964	0.55126	0.67162
7.65828	6.67302	0.94224	0.87917
5.46552	6.15956	1.41994	1.23289
4.42987	6.89321	1.87939	1.68935
7.31251	9.62746	2.26687	2.1368
13.1808	14.2265	2.51859	2.45534
21.3107	20.6937	2.6841	2.60178
29.2946	28.7977	2.89416	2.6331
34.5915	37.303	3.18819	2.65755
37.4505	43.9836	3.58188	2.78134
38.2006	46.3424	4.11498	3.07606
35.7404	43.0438	4.88324	3.56618
30.1351	34.8889	5.94827	4.25045
23.5135	24.2809	7.22323	5.1751
17.6537	14.2639	8.74532	6.48051
12.7353	7.57961	10.7436	8.29551
8.77454	4.8313	13.2053	10.5647
5.73961	3.56386	15.755	12.9907
3.30724	2.19213	17.9958	15.2057
1.9518	0.87385	19.6557	17.005
1.82596	0.4765	20.6148	18.2691
1.84238	0.90638	20.678	18.7817
2.11068	1.06418	19.8952	18.3473
2.18579	0.98332	18.9541	16.9811
1.75377	0.76691	17.9657	14.9421
1.28547	0.49717	16.4912	12.7881
0.96252	0.28887	15.6509	11.6364
0.75262	0.41513	17.286	13.0912
0.64893	0.66035	19.6038	16.7049
0.4904	0.80903	20.8756	19.7158
0.34366	0.81993	20.9678	20.3486
0.35998	0.72123	20.2415	18.8093
0.40752	0.5913	19.1817	16.2054
0.49751	0.50454	18.0695	13.5533
0.50625	0.46535	17.036	11.5624
0.30801	0.44844	16.1021	10.5675
0.22926	0.44937	15.3382	10.4461
0.40968	0.46763	14.8055	10.7314
0.33637	0.48688	14.4583	10.9932
0.17608	0.48853	14.2856	11.0709
0.22987	0.47195	14.1583	10.9707
0.35775	0.44931	13.9573	10.7091
0.4298	0.43111	13.591	10.2384
0.49516	0.43173	12.8579	9.47534
0.68625	0.50274	11.6021	8.38356
0.92963	0.69169	9.73392	6.92348
1.03751	0.955	7.40846	5.04085
1.17231	1.21358	4.88274	3.2274
1.40654	1.41763	2.68974	3.76128
1.67261	1.56749	3.87781	6.61937
1.91543	1.69325	7.48846	10.224
2.07652	1.81253	11.8511	14.742
2.27006	1.92635	17.3474	20.74
2.56974	2.04993	24.3239	28.1264
2.92207	2.22987	31.3154	35.7905
3.36787	2.53221	36.1573	42.1735
4.02164	3.01505	37.8507	46.1293
5.05939	3.71684	35.8894	46.7494
6.54951	4.69639	30.8973	42.819
8.27738	6.03503	24.7298	33.9457
10.0942	7.71247	18.5591	22.2694
11.9536	9.5484	12.9494	11.6232
13.8214	11.3046	8.43525	4.88584
15.599	12.8151	5.09004	2.73335
17.0254	14.0566	2.63572	2.22884
18.0181	15.0506	1.525	1.37074
18.5472	15.7314	1.77173	0.65585
18.5502	15.9777	2.03747	0.6652
18.1506	15.6541	2.12685	0.78109
17.4313	14.6364	1.97118	0.74865
16.5637	12.9774	1.5299	0.66638
15.9	11.1828	1.05218	0.60021
15.8052	10.362	0.86622	0.57175
16.803	11.5257	0.70296	0.61702
18.7178	14.4526	0.43738	0.70015
20.5021	17.8423	0.33048	0.74198
21.4274	20.0846	0.23985	0.72021
21.5183	20.3692	0.20284	0.66337
21.0592	19.126	0.34625	0.61506
20.1463	17.1659	0.39578	0.5959
18.7344	14.9363	0.34145	0.59948
17.0514	12.5787	0.27788	0.61888
15.4599	10.3383	0.23425	0.64136
14.3031	9.0026	0.18771	0.64827
13.8059	9.08226	0.22396	0.63349
13.763	9.81991	0.22375	0.60452
13.8185	10.3563	0.19578	0.57168
13.7994	10.4122	0.09017	0.54029
13.5701	10.0237	0.0467	0.51471
13.0174	9.3364	0.17446	0.50987
12.07	8.54281	0.30713	0.54707
10.7742	7.73199	0.46542	0.63817
9.25264	6.83944	0.64817	0.78395
7.40401	5.94164	0.91183	0.98075
5.28269	5.55826	1.29362	1.20899
4.72311	6.614	1.59078	1.43745
8.15607	9.83263	1.76621	1.65651
15.7843	15.6439	2.00009	1.87986
24.8193	24.0303	2.33372	2.12179
31.7844	33.8495	2.7393	2.39788
36.6906	42.6414	3.34496	2.74331
39.311	47.4004	4.14589	3.20405
38.0803	46.2512	5.02568	3.79517
33.1591	39.3927	6.06292	4.52192
26.6966	28.7281	7.23544	5.43938
20.3771	17.3999	8.61182	6.60973
14.7624	8.74075	10.3639	8.03111
9.89635	4.35267	12.4149	9.64006
5.80628	2.83847	14.52	11.3729
2.82438	1.79265	16.4712	13.1907
1.41094	0.82982	18.132	14.9375
1.76006	0.69764	19.36	16.3069
2.22179	0.94779	19.8027	17.0748
2.34363	0.96114	19.4892	17.187
2.22795	0.81003	19.049	16.6534
1.81559	0.61191	18.6114	15.5317
1.31541	0.43576	17.6248	13.9682
0.84917	0.36907	15.9595	12.4768
0.44169	0.46562	16.1958	12.2148
0.35488	0.57606	18.8176	13.8206
0.38353	0.60653	20.9339	16.5061
0.37742	0.57367	21.6554	18.7902
0.45878	0.52618	21.2672	19.2107
0.47749	0.49608	20.3828	17.603
0.33307	0.47915	19.3419	15.1365
0.131	0.4618	18.3558	12.988
0.21021	0.45542	17.5838	11.8335
0.26537	0.47105	17.0256	11.6994
0.25004	0.49347	16.656	12.0207
0.266	0.50153	16.4057	12.3166
0.32722	0.48861	16.0667	12.3959
0.3947	0.46533	15.5367	12.1896
0.41359	0.45109	14.9049	11.6141
0.43022	0.47061	14.1815	10.5558
0.51395	0.55596	13.2066	8.98443
0.73954	0.73423	11.5881	7.03504
1.07313	1.00291	9.20863	4.97677
1.47594	1.32547	6.27197	3.2172
1.9175	1.65427	3.13511	3.09969
2.30892	1.95831	3.33109	5.56271
2.65987	2.23325	7.82693	9.64228
3.01305	2.47817	13.8236	15.5667
3.31389	2.6869	21.4069	23.7903
3.66665	2.88677	29.7979	33.7144
4.21792	3.17012	36.8546	43.3358
5.03859	3.67	40.8466	50.1385
6.16436	4.4854	40.8279	52.6112
7.55323	5.60587	36.8028	50.5046
9.08873	6.90272	30.4339	43.7957
10.6389	8.25094	23.3859	32.9084
12.2932	9.66649	16.6201	20.2114
14.1192	11.2144	10.8228	9.42114
15.9809	12.8246	6.34219	3.04822
17.5443	14.2974	3.12349	1.80168
18.6625	15.4391	1.28759	1.76523
19.3242	16.1512	1.64953	1.18453
19.2951	16.3743	2.38473	0.78802
18.5884	16.023	2.76949	0.75301
17.7184	15.0478	2.65666	0.68436
17.0194	13.4916	1.86907	0.53043
16.6366	11.8098	1.11346	0.45962
17.2006	11.5487	0.83645	0.54655
18.7207	13.9325	0.6719	0.65627
19.8819	17.3763	0.43687	0.70904
20.3565	19.6671	0.36596	0.69423
20.8223	20.1631	0.40281	0.64561
21.3529	19.7477	0.34563	0.61217
21.4681	19.1606	0.29562	0.6088
20.8425	18.0891	0.22018	0.62342
19.5423	16.0863	0.1443	0.64138
17.9096	13.3609	0.16734	0.65178
16.4553	11.0053	0.40357	0.6502
15.6578	10.257	0.38202	0.64015
15.7414	10.9343	0.32857	0.63217
16.1397	11.8974	0.29228	0.62646
16.1893	12.3535	0.35298	0.61211
15.8644	12.09	0.31325	0.59249
15.0516	11.2259	0.07227	0.58757
13.7009	9.91769	0.26526	0.63136
11.9406	8.37215	0.54092	0.78328
9.74668	6.92423	0.85306	1.07636
7.2721	5.90801	1.23413	1.44542
4.84607	5.57017	1.66123	1.77734
3.90518	6.44786	1.94761	2.00796
6.39095	9.24029	1.98105	2.14077
11.8407	13.8919	1.95117	2.20758
20.0233	19.882	2.07585	2.25311
28.559	26.8022	2.38899	2.33206
34.7624	34.2373	2.8422	2.48827
38.5044	40.8766	3.35722	2.73845
39.6163	44.6373	3.93627	3.08841
37.2864	44.1865	4.69967	3.56759
31.9994	39.2499	5.85098	4.22572
25.4813	30.3352	7.39965	5.14362
19.1716	19.5365	9.20123	6.4506
13.7354	10.1637	11.2562	8.21943
9.33314	4.84922	13.5167	10.3439
6.02927	3.61229	15.7258	12.5426
3.67144	3.00992	17.6746	14.5095
2.15565	1.84314	19.217	16.0907
1.8958	0.6624	20.1486	17.2063
2.14288	0.68145	20.1532	17.7007
2.34178	1.12045	19.3676	17.4515
1.97039	1.19968	18.6183	16.5074
1.41473	0.99715	18.19	15.03
1.22403	0.65708	17.2101	13.2132
0.9558	0.36963	15.5501	11.5089
0.59991	0.37798	15.8756	11.4307
0.47226	0.51881	18.454	14.2199
0.24383	0.60011	20.8316	17.9915
0.27397	0.5995	21.8657	20.4598
0.29201	0.54307	21.6444	20.6956
0.49573	0.47483	20.7037	18.8525
0.55509	0.42685	19.5374	15.9912
0.41732	0.40558	18.4986	13.5077
0.20131	0.39489	17.6553	12.1782
0.13612	0.38669	16.9589	11.7996
0.12532	0.39906	16.4418	11.707
0.13366	0.43545	15.9972	11.5052
0.14234	0.46872	15.43	11.1693
0.26174	0.47683	14.6395	10.7157
0.34779	0.45876	13.677	10.0893
0.26597	0.42854	12.7535	9.16619
0.13433	0.4025	11.743	7.7662
0.17133	0.39089	10.0324	5.79331
0.32532	0.39087	7.638	3.37171
0.29637	0.38832	4.73261	1.31932
0.2431	0.3819	1.93868	3.19773
0.45352	0.41498	4.95897	6.732
0.91514	0.55846	10.1495	11.1737
1.39923	0.84905	15.9119	16.7615
1.96124	1.32395	23.0407	23.9535
2.85657	1.99307	30.8681	32.744
3.75923	2.78657	36.8204	41.8166
4.59336	3.60858	39.4477	48.5286
5.64674	4.43646	38.3119	49.8952
7.03017	5.35735	33.7068	44.4996
8.53265	6.4701	27.2477	33.8345
9.99977	7.77825	20.6653	21.4321
11.6235	9.20234	14.7862	10.9345
13.5145	10.6759	9.86192	4.96302
15.4186	12.2071	5.95913	3.50747
17.0031	13.7605	3.27357	2.79084
18.1293	15.1546	1.80374	1.65556
18.8731	16.1752	1.55961	0.59094
19.1678	16.6812	1.937	0.38703
18.8791	16.5961	2.14348	0.71734
18.1767	15.8868	2.12435	0.79897
17.3174	14.5998	1.92767	0.72095
16.4673	12.9814	1.5393	0.59936
16.1384	11.6276	1.06507	0.52797
17.0418	11.6847	0.69329	0.53491
18.7366	13.7528	0.46605	0.57547
20.1219	16.4589	0.32322	0.61812
20.8211	18.2832	0.29683	0.64693
21.0169	18.7653	0.38894	0.65019
20.923	18.1282	0.29487	0.62971
20.6465	16.8619	0.31996	0.5969
20.0416	15.3537	0.26471	0.56755
19.1285	13.8284	0.12091	0.55707
18.1077	12.6326	0.24901	0.57368
17.1948	12.0829	0.36835	0.61289
16.5577	12.0676	0.38078	0.65704
16.0963	12.1905	0.28833	0.68568
15.7176	12.1366	0.21781	0.68539
15.3169	11.7674	0.22285	0.65512
14.6238	11.0886	0.22479	0.60888
13.5571	10.2173	0.22433	0.56808
12.188	9.23399	0.34904	0.55985
10.5022	8.09131	0.57897	0.63236
8.47612	6.83763	0.86362	0.81941
6.06157	5.99993	1.13001	1.07811
4.99962	6.66349	1.38352	1.33116
7.85086	9.373	1.59185	1.53694
12.583	13.9993	1.76003	1.69507
18.8957	20.3254	1.97507	1.82552
26.2769	27.6133	2.20809	1.96918
32.5805	34.505	2.45652	2.17994
36.5025	39.515	3.00356	2.49858
37.8443	41.6065	3.84266	2.94906
36.1754	40.1037	4.80451	3.57951
31.5043	34.7366	6.04423	4.48371
25.4066	26.654	7.56498	5.7277
19.541	18.1809	9.27999	7.28089
14.4124	11.058	11.3806	9.05658
10.1021	6.08857	13.9291	11.0265
6.67945	3.59776	16.6494	13.2204
4.08928	2.60164	19.0624	15.4883
2.59289	1.76653	20.8859	17.446
1.96117	0.88838	21.9524	18.7673
1.67228	0.25311	21.9564	19.2818
1.73806	0.53506	21.1626	18.9172
1.9257	0.79596	20.2643	17.8016
1.96255	0.84328	19.5139	16.2156
1.664	0.73112	18.1764	14.4925
1.26854	0.55114	16.628	13.2514
0.89183	0.4251	17.7193	13.4258
0.50393	0.44812	20.3138	15.5891
0.28952	0.55423	22.1453	18.6708
0.2562	0.63821	22.7199	20.4626
0.28284	0.65139	22.1781	19.9838
0.25517	0.58105	20.9367	17.8624
0.21306	0.45957	19.4398	15.0825
0.24102	0.35403	18.1218	12.6421
0.31764	0.31579	17.1107	11.3509
0.19494	0.33751	16.3666	11.1254
0.14276	0.37589	15.8387	11.3077
0.27278	0.41146	15.4044	11.4318
0.3527	0.44776	15.0378	11.3691
0.37044	0.47576	14.7216	11.1429
0.32808	0.48026	14.2483	10.7521
0.20927	0.46084	13.5153	10.1366
0.07442	0.42998	12.5274	9.15009
0.17431	0.40648	10.7713	7.57705
0.28659	0.40501	8.15327	5.34645
0.37564	0.43113	5.06835	3.04121
0.61445	0.50611	1.62524	3.55289
1.02221	0.70393	4.05639	7.12091
1.48451	1.0959	9.39971	12.2235
2.10902	1.66061	15.2129	18.9738
3.01844	2.29961	22.1708	27.0167
3.89316	2.91982	30.2338	35.2802
4.62467	3.51732	36.6494	42.5143
5.44602	4.15771	39.1091	47.7071
6.50914	4.90495	37.7565	49.6174
8.04328	5.82056	33.4419	46.5213
9.94601	7.02355	27.4921	37.7574
11.8764	8.66528	21.144	25.5053
14.0058	10.7467	15.1371	13.8639
16.3501	13.0236	10.0311	6.18922
18.4846	15.1382	6.15684	3.65242
20.0509	16.8136	3.49012	3.08588
20.9769	17.956	1.85287	2.01752
21.2825	18.5485	1.50531	0.84089
20.9048	18.5175	1.79822	0.37466
19.8801	17.7693	1.87364	0.64645
18.5718	16.1973	1.72025	0.74415
17.2488	13.8486	1.5341	0.73396
16.2434	11.7684	1.30663	0.72153
16.8194	12.3805	1.03234	0.71924
18.9434	15.7789	0.76852	0.71632
21.0484	19.0894	0.44065	0.71397
22.1769	20.5906	0.18211	0.71189
22.3162	20.2585	0.18842	0.6971
21.8696	18.75	0.23957	0.64751
21.0337	16.7452	0.25844	0.57005
19.776	14.6729	0.19002	0.50797
18.2666	12.7219	0.16161	0.49098
16.7574	11.2114	0.22744	0.51051
15.4741	10.4742	0.13466	0.54571
14.5479	10.369	0.0415	0.58636
13.9621	10.4832	0.18863	0.6294
13.7264	10.5574	0.25147	0.66591
13.6319	10.4873	0.29034	0.68278
13.351	10.1687	0.29063	0.67186
12.6093	9.48199	0.23777	0.63446
11.3584	8.42711	0.22994	0.58157
9.82608	7.24484	0.17715	0.52524
8.17381	6.37785	0.25847	0.47368
6.60195	6.19887	0.39454	0.44716
5.79116	6.92643	0.58818	0.49866
6.92856	8.71876	0.9372	0.66691
9.56973	11.4442	1.40165	0.94177
13.0067	14.8333	1.81798	1.32798
18.3457	18.9204	2.20318	1.81604
25.3588	24.0667	2.63847	2.33398
31.1809	30.2706	3.14095	2.79854
34.6133	36.4975	3.73749	3.1827
35.399	40.7425	4.37942	3.53539
33.2562	40.7473	5.13279	3.95655
28.7519	35.4788	6.26006	4.58916
23.2675	26.3183	7.7703	5.61721
17.8905	16.319	9.62804	7.1722
12.9934	8.39256	11.9177	9.20658
8.72678	4.25069	14.4328	11.4709
5.40437	3.04372	16.8374	13.6801
3.16672	2.10992	18.9135	15.6952
1.78324	0.97083	20.5354	17.4084
1.62598	0.58705	21.4758	18.6084
1.89528	1.06227	21.559	19.1267
1.70903	1.23494	21.0847	18.9218
1.80392	1.09122	20.4895	17.9942
2.07507	0.78195	19.865	16.3902
1.71682	0.48537	18.0576	14.3584
1.1044	0.38929	15.9118	12.9511
0.49828	0.47457	17.6131	13.9125
0.19909	0.57187	20.936	16.882
0.30721	0.60614	23.0027	19.8963
0.37074	0.55976	23.5193	21.5314
0.39996	0.4565	23.004	20.951
0.41767	0.34697	22.0529	18.5138
0.35885	0.29405	21.0224	15.719
0.37016	0.29294	20.1281	13.8943
0.32111	0.29425	19.4062	13.3715
0.23478	0.31117	18.7272	13.5674
0.28794	0.37085	18.1535	13.7875
0.36786	0.44632	17.7667	13.7769
0.19527	0.48362	17.3436	13.5134
0.1466	0.45965	16.6415	12.9513
0.10739	0.40229	15.6212	11.9145
0.18087	0.35946	13.936	10.1082
0.21455	0.35245	11.232	7.31857
0.15465	0.36993	7.72453	3.65467
0.39909	0.40272	3.52128	1.53392
0.62192	0.47969	2.16601	5.87396
0.95154	0.66995	8.01927	11.1844
1.54873	1.00955	14.5794	17.3128
2.36417	1.49047	21.7941	24.2699
3.13328	2.1067	29.9849	32.0496
3.86259	2.8175	37.1622	40.0247
4.681	3.53988	40.3503	46.4537
5.61267	4.24647	39.1432	49.0935
6.90975	5.04456	34.4185	46.1129
8.49596	6.12078	27.8267	37.3479
10.1407	7.56664	21.1957	25.4489
11.9826	9.27951	15.2696	14.535
13.8666	11.0287	10.2622	7.21493
15.4969	12.5998	6.32547	3.72476
16.8448	13.9232	3.49142	2.4689
17.8588	15.0031	1.81994	1.53799
18.398	15.7696	1.52188	0.69669
18.406	16.0872	2.05034	0.46274
17.8939	15.7873	2.01256	0.6005
16.986	14.7102	1.73344	0.62092
15.8551	12.934	1.49798	0.5806
14.8689	11.1709	1.1344	0.58835
14.9826	10.7174	0.87279	0.63622
16.403	11.9421	0.76176	0.67328
18.0028	13.8728	0.51415	0.68856
18.993	15.5657	0.25722	0.6801
19.3488	16.4273	0.28304	0.65301
19.3648	16.4183	0.2838	0.62205
19.3301	15.8554	0.23149	0.59864
19.1441	14.9123	0.116	0.58564
18.5713	13.7375	0.07015	0.58113
17.7408	12.6724	0.15281	0.58117
16.919	12.0905	0.09428	0.57927
16.353	12.0525	0.29801	0.57204
16.1773	12.3025	0.49216	0.5692
16.1569	12.5714	0.48798	0.59296
16.1048	12.7053	0.56312	0.66221
15.9428	12.652	0.75986	0.78374
15.4541	12.4048	1.07555	0.95786
14.5263	11.9931	1.35233	1.16565
13.1308	11.4565	1.47306	1.36695
11.3367	10.6473	1.55811	1.53367
8.95824	9.29952	1.63891	1.65782
5.90678	7.56225	1.67025	1.7331
4.15971	6.65645	1.64011	1.75423
6.88549	8.53108	1.58247	1.72693
14.3385	13.4017	1.62482	1.67662
24.5029	20.8822	1.79976	1.65623
32.9104	30.4596	2.13536	1.74928
38.0934	40.4187	2.72037	2.07294
39.7679	47.7826	3.63554	2.74531
37.519	49.2443	5.00341	3.78349
32.2997	43.3229	6.63059	5.06084
26.0033	31.9907	8.35442	6.43799
19.7662	19.4766	10.4216	7.91037
14.0601	9.69946	12.8511	9.53808
9.12506	4.89979	15.3342	11.3592
5.18497	3.66702	17.6145	13.4053
2.58078	2.53522	19.5948	15.5605
1.57976	1.24864	20.8751	17.4813
1.84876	0.88655	21.1727	18.8042
2.16634	1.20618	20.8544	19.2975
2.3099	1.23795	20.26	18.8631
2.15133	0.97296	19.4907	17.5023
1.83834	0.59145	17.658	15.2576
1.33161	0.3765	15.7414	12.7369
0.68858	0.50577	17.4823	12.4381
0.41602	0.6473	20.5341	16.1748
0.42239	0.68103	22.1342	20.9742
0.37896	0.62415	22.2692	23.4028
0.36332	0.54439	21.4713	22.2599
0.45389	0.51516	20.3225	18.7102
0.46484	0.5454	19.1764	14.8732
0.43494	0.60484	18.0698	12.2424
0.59164	0.68547	17.0906	11.2057
0.93223	0.81026	16.3828	11.2505
1.23917	0.99274	15.9381	11.6651
1.49783	1.20899	15.6274	12.0023
1.76647	1.40033	15.3132	12.0583
1.77327	1.50083	14.9648	11.767
1.50314	1.49255	14.6743	11.1455
1.30226	1.41352	14.1692	10.2699
1.14823	1.31671	12.8377	9.18672
1.10586	1.24814	10.8222	7.87372
1.15269	1.23486	8.48349	6.38932
1.17935	1.27496	5.81713	5.08463
1.24811	1.3561	3.75263	5.29868
1.38161	1.47559	5.78312	8.35987
1.6108	1.63367	10.3074	13.326
2.01281	1.83088	15.4487	19.2283
2.46099	2.08608	21.8394	25.741
3.06156	2.43667	29.4456	32.7689
4.07355	2.92692	35.6459	39.5311
5.34839	3.61372	38.5442	44.3045
6.97762	4.60763	37.7435	45.3631
9.13453	6.07624	33.7315	41.6225
11.5517	8.09696	28.0551	33.1903
14.1544	10.5199	21.9363	22.4094
16.8672	13.02	16.081	12.9789
19.2933	15.3011	10.9564	7.10832
21.0992	17.2408	6.6735	4.39358
22.1374	18.7406	3.40616	3.07757
22.2526	19.5781	1.65066	1.97735
21.4533	19.5396	1.68425	1.03967
20.1762	18.4785	2.19955	0.68206
18.8736	16.3677	2.48222	0.68594
17.7911	13.8384	2.31962	0.58157
17.4867	12.8392	1.83677	0.43523
18.8335	14.8066	1.48518	0.48327
21.1336	17.9887	1.23583	0.6827
22.921	20.4604	0.82177	0.85493
23.7264	21.6358	0.50278	0.9328
23.6158	21.4225	0.34879	0.9118
22.7691	20.0564	0.30657	0.83223
21.3555	17.8892	0.31197	0.74769
19.4627	15.068	0.35379	0.686
17.4046	12.099	0.607	0.64171
15.662	10.0819	0.7014	0.59839
14.5063	9.63546	0.55556	0.55681
13.7395	10.0349	0.54707	0.54976
13.2424	10.3658	0.70936	0.62841
13.1191	10.3222	0.90239	0.78444
12.9492	9.92512	1.00484	0.94202
12.3159	9.2563	0.98993	1.07681
11.1553	8.35265	0.90881	1.24134
9.57614	7.21647	0.87986	1.45389
7.82801	5.99737	0.99612	1.65328
5.77787	5.14198	1.11287	1.76249
3.59595	5.24927	1.04523	1.75023
3.39646	6.67485	0.91287	1.6487
6.26622	9.70762	0.78613	1.51562
10.8361	14.6699	0.66716	1.39471
18.3832	21.3916	0.7058	1.31647
27.5633	28.9676	0.90173	1.30216
34.1549	36.233	1.22125	1.36187
37.2397	42.2921	1.77511	1.52309
37.0235	45.8621	2.60277	1.85918
33.2023	44.7976	3.85464	2.46961
27.2674	37.8909	5.66665	3.48259
21.2153	26.8523	7.82445	5.05437
15.7368	15.4848	10.2179	7.22108
10.7614	7.30679	12.9515	9.79308
6.67553	4.21462	15.854	12.4345
3.71006	3.63941	18.492	14.8434
2.03138	2.53426	20.5593	16.8757
1.49446	1.1489	21.8701	18.4035
1.52751	0.52113	22.22	19.2223
1.83593	0.89698	21.6974	19.2601
2.15247	1.01221	20.7222	18.5999
2.13127	0.85951	19.7623	17.2784
1.68009	0.60287	18.5506	15.3128
1.0595	0.41065	16.3123	13.0098
0.54199	0.40275	15.9659	11.9012
0.36979	0.48519	19.0664	14.1783
0.3976	0.54817	21.8282	18.4386
0.38843	0.5591	22.9234	21.7427
0.34332	0.53018	22.5722	22.497
0.42411	0.50369	21.4376	20.5494
0.47254	0.50744	20.0894	17.0645
0.40901	0.52921	18.719	13.6827
0.27002	0.54153	17.4369	11.4458
0.23709	0.53666	16.3443	10.5519
0.27824	0.52697	15.3551	10.4997
0.28568	0.5275	14.5853	10.6316
0.61007	0.55472	14.1813	10.6832
0.83628	0.62135	13.9275	10.6435
0.733	0.70978	13.679	10.4914
0.50943	0.77259	13.3904	10.1123
0.5048	0.78388	12.8164	9.32203
0.62946	0.76857	11.4976	7.96874
0.66758	0.77041	9.31873	6.05738
0.62767	0.81078	6.60614	3.89651
0.68746	0.89169	3.50637	2.723
0.97687	1.01896	2.21482	4.7226
1.37257	1.2003	6.49116	8.46068
1.60661	1.42606	11.601	12.9897
1.84616	1.66923	16.7977	18.4438
2.23963	1.91116	22.3347	25.0157
2.69468	2.16528	28.4097	32.1083
3.28707	2.46936	33.4164	38.2208
4.13449	2.88607	35.4517	41.5169
5.18315	3.51693	34.3227	40.6821
6.44549	4.45669	30.3064	35.4176
8.09169	5.72002	24.7036	26.6634
10.0845	7.23126	19.0684	16.8821
12.2855	8.93663	13.9542	9.16927
14.6883	10.8962	9.63063	5.17066
17.1453	13.1164	6.13002	3.77178
19.1993	15.3687	3.45204	2.84662
20.5778	17.2836	1.79544	1.74488
21.2282	18.5314	1.50208	0.67986
21.0295	18.9236	1.79073	0.26189
19.983	18.3862	1.88769	0.50956
18.4787	16.9296	1.77308	0.5081
17.0057	14.7724	1.5943	0.40176
16.2354	12.5417	1.31746	0.40086
17.3242	11.7728	0.94675	0.49356
19.5217	13.8324	0.6729	0.55645
20.9765	17.1121	0.50836	0.57448
21.1804	19.3764	0.33998	0.57086
20.5997	19.7415	0.30804	0.56202
19.8673	18.4211	0.35079	0.56407
19.3358	16.3185	0.38152	0.58602
18.7756	14.2452	0.22344	0.61689
18.0527	12.5844	0.22535	0.6343
17.313	11.6636	0.20873	0.62757
16.6232	11.6377	0.56605	0.60497
16.1816	12.2513	0.46148	0.57722
16.128	13.0017	0.35974	0.54875
16.2587	13.4703	0.3655	0.52545
16.299	13.4551	0.4588	0.52808
16.119	12.9059	0.71404	0.59673
15.5475	11.8954	1.09016	0.75738
14.3767	10.6223	1.34679	0.99608
12.7589	9.34865	1.36885	1.24951
10.7923	8.25849	1.3169	1.43184
8.69391	7.57597	1.27447	1.51073
7.15396	7.93303	1.25724	1.51953
7.35526	9.8352	1.30952	1.50208
9.57513	12.9694	1.35645	1.48559
13.7383	17.034	1.41313	1.49248
20.4395	22.2859	1.61325	1.55786
28.0008	28.8975	1.94311	1.72504
33.3686	36.0988	2.3587	2.01149
36.2424	42.0328	2.94976	2.40308
37.1912	44.4872	3.77359	2.91089
35.4242	42.4098	4.76573	3.60865
30.9272	36.7031	5.96382	4.57487
25.4923	29.01	7.47549	5.81569
20.2044	20.4778	9.31898	7.27014
15.166	12.3842	11.4863	8.9124
10.6311	6.43184	13.8852	10.7893
6.67929	3.41178	16.3195	12.8434
3.40415	2.20961	18.5442	14.858
1.50517	1.36303	20.2362	16.6458
1.81766	0.76604	21.0999	18.0392
2.24938	0.80533	21.1557	18.8181
2.39042	0.94107	20.7728	18.8563
2.28697	0.86204	20.2809	18.1343
1.82888	0.60924	19.2441	16.6553
1.21357	0.31666	16.9898	14.6456
0.76007	0.30306	16.1268	13.006
0.51727	0.50677	18.6134	13.6717
0.39084	0.63644	21.2168	16.907
0.39852	0.65665	22.4738	19.8308
0.56048	0.61019	22.5786	20.558
0.57142	0.56065	21.9502	19.3233
0.38446	0.54059	21.0157	17.0808
0.15985	0.53227	20.0551	14.7954
0.25335	0.51364	19.1965	13.2763
0.28622	0.49578	18.509	12.7934
0.53561	0.50579	18.031	12.9942
0.76763	0.55901	17.6864	13.3265
0.87316	0.66238	17.3188	13.4611
1.06516	0.82777	16.8798	13.3403
1.21093	1.04623	16.3401	12.9891
1.22974	1.26924	15.5257	12.392
1.38846	1.44757	14.2803	11.4244
1.57445	1.56206	12.3925	9.88324
1.66162	1.61857	9.70294	7.77924
1.8136	1.63142	6.47472	5.92021
1.89568	1.61533	4.11913	6.39822
1.78633	1.59369	6.84078	9.93978
1.75469	1.60379	12.8371	15.8405
1.92319	1.69009	19.6584	23.8184
2.23271	1.89865	27.496	32.9112
2.76617	2.26786	35.4796	41.4142
3.57594	2.81073	40.4995	47.6414
4.72614	3.54036	41.2154	50.6166
6.26187	4.50486	38.4622	49.844
8.22117	5.73369	33.38	44.6621
10.5151	7.25667	27.0149	34.9967
13.0299	9.18435	20.3861	22.9048
15.6636	11.5543	14.3973	12.0095
18.1756	14.1384	9.32482	5.20915
20.1959	16.5164	5.45228	3.33269
21.5142	18.301	3.01758	2.98614
22.1602	19.3121	1.93203	2.10717
22.0256	19.5272	1.75705	1.10648
21.0914	18.9663	1.85642	0.50514
19.8195	17.7305	1.89349	0.50893
18.8648	15.9744	1.76209	0.61515
18.4443	14.0312	1.60364	0.6669
18.4125	12.9565	1.42258	0.69602
18.813	14.0263	1.11293	0.70333
19.8987	16.7311	0.76746	0.70867
21.9192	19.4413	0.52134	0.72102
24.2608	21.3681	0.33682	0.71764
25.6628	22.4716	0.29538	0.69344
25.5092	22.4912	0.34745	0.66703
23.9665	21.0824	0.35078	0.65244
21.5294	18.312	0.39107	0.64474
18.8992	14.7105	0.44488	0.63568
16.7495	11.5972	0.33101	0.63194
15.4247	10.536	0.29744	0.64388
14.7747	11.099	0.31689	0.66758
14.4146	11.5562	0.32885	0.68572
13.9416	11.0804	0.3193	0.68245
13.103	9.74446	0.27054	0.65965
11.686	7.92272	0.09752	0.6345
9.78463	5.94475	0.06626	0.62112
7.64164	4.03271	0.10134	0.62134
5.26914	2.8571	0.1779	0.62963
3.3087	4.06005	0.22684	0.64255
3.51197	6.71476	0.29295	0.66872
6.12292	9.7676	0.51757	0.73838
9.94862	13.4368	0.92283	0.89229
16.1241	18.5783	1.45094	1.15776
24.8609	25.7503	2.06407	1.55563
32.1471	34.1711	2.71823	2.08347
35.4135	41.3821	3.31761	2.69035
35.513	44.2245	3.92728	3.31162
32.9828	40.9603	4.74367	3.9375
28.0836	32.5599	5.93076	4.63608
22.2507	21.8813	7.39957	5.49464
16.9337	12.2049	9.09424	6.62272
12.2171	6.25325	11.1965	8.20572
8.19139	4.43467	13.6814	10.3552
5.13997	3.70701	16.2066	12.8916
3.05088	2.6019	18.4903	15.3801
1.87643	1.32651	20.2669	17.3876
1.5851	0.26922	21.1389	18.7175
1.68063	0.60017	21.0048	19.3334
1.90196	0.93094	20.2866	19.1359
2.19439	0.96107	19.4073	18.0134
1.98784	0.8159	18.6114	16.088
1.57565	0.60003	17.4623	13.8466
1.18848	0.4287	15.6432	12.1639
0.80232	0.44433	16.0086	12.2968
0.50841	0.54793	19.0627	15.1723
0.328	0.58017	21.7989	19.5613
0.36633	0.53466	23.1174	22.7469
0.35632	0.47425	23.1372	23.0965
0.29214	0.4491	22.3796	20.9855
0.23628	0.45306	21.2869	17.8485
0.23188	0.45661	20.1138	15.1277
0.22794	0.4535	19.0147	13.6166
0.28925	0.45061	18.0297	13.0787
0.34856	0.45014	17.103	12.8209
0.40515	0.45012	16.2157	12.3977
0.44739	0.45283	15.2971	11.7246
0.2963	0.47807	14.321	10.8824
0.3418	0.56439	13.3495	9.90781
0.72252	0.72553	12.1708	8.71988
0.9677	0.92514	10.386	7.08637
1.11025	1.12608	7.92161	4.70775
1.33756	1.30873	4.90801	1.67703
1.53926	1.45877	1.58286	2.93555
1.68007	1.57762	3.11133	7.01127
1.89185	1.69509	7.62853	11.1972
2.24946	1.85953	12.7389	15.6066
2.69018	2.11167	17.873	20.4759
3.14908	2.46368	23.3199	25.8426
3.69682	2.91156	29.4262	31.563
4.47687	3.49065	34.1399	36.8865
5.56792	4.30582	35.4318	40.3211
7.03682	5.45671	33.0678	40.3961
8.91094	6.93815	28.084	36.2457
10.9985	8.63297	22.2928	28.1503
13.2179	10.4302	17.0168	18.3322
15.589	12.315	12.4216	10.089
18.0236	14.2373	8.33011	5.35884
20.1043	16.0427	4.90151	3.42957
21.399	17.6055	2.50683	2.30318
21.893	18.7869	1.70234	1.3127
21.6002	19.332	1.98931	0.8459
20.414	18.9828	2.18588	0.78889
18.8087	17.5423	2.01479	0.62484
17.4771	15.0683	1.71934	0.36069
16.8743	12.721	1.44	0.24326
17.7666	13.0589	1.2078	0.40481
19.4803	16.1635	0.96178	0.54967
20.5478	18.9521	0.81213	0.61425
20.8835	19.735	0.63965	0.63216
20.9193	18.9873	0.45429	0.63179
20.6673	17.8772	0.50674	0.62602
20.1055	16.8551	0.39163	0.62031
19.1687	15.5305	0.32398	0.61468
17.9948	13.6896	0.48801	0.61137
16.9877	12.1475	0.52216	0.61703
16.2609	11.8981	0.4514	0.64397
15.8505	12.5711	0.64436	0.7183
15.8603	13.1408	1.00554	0.86992
15.945	13.1099	1.25676	1.07991
15.7667	12.4937	1.31005	1.27203
15.2614	11.4925	1.25949	1.38141
14.269	10.3207	1.15482	1.39331
12.86	9.10943	1.01664	1.33742
11.3044	7.9183	0.8706	1.26976
9.50663	6.96489	0.77023	1.22677
7.49182	6.67798	0.6969	1.20415
6.05571	7.33255	0.62992	1.19331
6.57789	8.99339	0.6059	1.19932
9.32525	11.9905	0.64996	1.22676
13.6049	16.7297	0.77703	1.27438
19.8417	23.002	1.06284	1.3502
27.465	29.8058	1.45722	1.48382
33.4413	35.8073	1.94692	1.73349
36.4017	39.8203	2.59875	2.18414
36.8115	40.5995	3.57913	2.90328
34.3289	37.1857	4.92911	3.88391
29.6316	30.3665	6.54795	5.04429
24.3585	22.3792	8.34997	6.3257
19.1383	14.9657	10.4119	7.77625
14.0903	9.16455	12.9316	9.46323
9.40594	5.6996	15.673	11.417
5.57575	3.90203	18.1674	13.6567
2.72906	2.4529	20.1563	16.0194
1.41666	1.13437	21.4146	18.082
1.93391	0.59448	21.731	19.4272
2.23198	0.93251	21.2443	19.8179
2.32138	1.05346	20.4003	19.1742
2.17861	0.89728	19.331	17.5352
1.64756	0.61036	17.3952	15.0076
0.88465	0.3945	15.7293	12.3175
0.43297	0.4263	17.52	12.1421
0.34289	0.54881	20.4697	16.0438
0.333	0.62682	22.0397	20.7992
0.28063	0.63623	22.2605	23.1699
0.27852	0.59589	21.5828	22.1097
0.28025	0.54869	20.4741	18.7503
0.43931	0.52017	19.2792	15.06
0.48699	0.50504	18.196	12.4137
0.50414	0.48969	17.2779	11.2281
0.34158	0.47552	16.4795	11.1206
0.22936	0.47787	15.8612	11.4531
0.36665	0.51754	15.485	11.7949
0.65606	0.62163	15.3041	11.9515
0.98264	0.7974	15.1311	11.8569
1.14566	1.00906	14.7958	11.5023
1.1646	1.20612	14.3708	10.9054
1.26331	1.36673	13.5364	10.0488
1.52495	1.50122	11.72	8.8905
1.71171	1.62377	9.29194	7.51992
1.79429	1.72814	6.9354	6.30298
1.91496	1.78616	5.35257	6.42297
1.94106	1.78257	6.58653	9.26679
1.8873	1.74539	10.6519	14.104
1.96076	1.72826	15.8165	19.6851
2.17184	1.78023	21.6081	25.3825
2.53229	1.95209	27.7014	31.0551
3.08282	2.31362	32.9355	36.3272
3.88703	2.92566	35.9885	40.1973
5.00071	3.79399	36.3829	41.517
6.46838	4.8836	34.0756	39.3134
8.26302	6.21901	29.5548	33.2647
10.4096	7.92588	23.9516	24.789
12.8453	10.061	18.2653	16.4811
15.3359	12.4533	13.0855	9.97633
17.6626	14.7732	8.69083	5.59458
19.6468	16.7342	5.28734	3.22109
21.0618	18.2248	2.85332	2.08681
21.6774	19.1823	1.53584	1.28323
21.4357	19.4252	1.5364	0.76153
20.43	18.7725	1.83586	0.74874
19.0344	17.2661	1.97564	0.84183
17.9898	15.2676	1.88901	0.78821
17.5803	13.3943	1.58316	0.64991
17.5728	12.2277	1.2701	0.5532
17.9224	12.3025	0.97059	0.56193
18.9157	14.1699	0.80522	0.64337
21.1605	17.5561	0.64124	0.71703
23.9941	21.2394	0.28978	0.73544
25.8479	23.7895	0.46145	0.70527
26.0313	24.2812	0.43068	0.65373
24.7473	22.5806	0.34774	0.60464
22.5208	19.2	0.29027	0.56982
19.946	15.3001	0.24641	0.54997
17.5866	12.2901	0.29091	0.54075
15.8073	10.836	0.298	0.54146
14.7872	10.4958	0.25552	0.56128
14.1886	10.3722	0.37286	0.61109
13.5108	9.88301	0.4886	0.69991
12.5562	8.90385	0.48971	0.82056
11.4026	7.51086	0.46293	0.93862
10.0581	5.87027	0.5239	1.0314
8.38264	4.17837	0.75083	1.11394
6.37382	2.66845	1.05114	1.21351
4.20376	2.3341	1.2446	1.33337
3.26267	4.36907	1.30104	1.45076
5.40703	7.88046	1.33026	1.5491
9.34158	12.3665	1.44255	1.63284
15.0251	17.6466	1.62728	1.71533
22.8516	23.7467	1.85975	1.81326
30.807	30.5949	2.25346	1.95555
35.6134	37.1309	2.79656	2.1873
36.878	41.38	3.55532	2.56621
35.5803	41.8258	4.66078	3.19263
31.4332	37.849	6.14248	4.22169
25.5438	29.7423	8.03673	5.75135
19.7083	19.5021	10.2704	7.69793
14.4416	10.3514	12.6718	9.81257
9.94856	4.87438	15.0273	11.8466
6.29794	3.42313	16.9435	13.6816
3.54037	2.89213	18.1905	15.1945
1.76539	1.88561	18.8039	16.154
1.69516	0.84782	18.6325	16.4138
1.90764	0.49365	17.8228	16.0305
1.62474	0.77036	17.0054	15.1265
1.61885	0.88229	16.3361	13.7257
1.78118	0.79076	15.2686	11.7018
1.72495	0.58876	13.3906	9.363
1.45161	0.42934	14.092	9.35619
0.94253	0.50942	18.0903	13.9587
0.36688	0.6708	21.1614	19.7217
0.15839	0.74049	22.2852	23.0316
0.26143	0.7169	21.8619	22.5794
0.30827	0.64984	20.5861	19.4928
0.40861	0.58226	19.1493	15.8224
0.47514	0.53066	17.8853	12.845
0.34376	0.48969	16.7504	10.9708
0.30354	0.45784	15.7965	10.2031
0.35781	0.44649	15.0959	10.1553
0.35476	0.46244	14.4826	10.3312
0.25707	0.49075	13.9172	10.4313
0.20566	0.51245	13.4702	10.3557
0.28644	0.52031	13.1244	10.0612
0.18586	0.51346	12.7802	9.45836
0.18823	0.4972	11.9292	8.43524
0.20723	0.48643	10.3156	6.94107
0.21641	0.5037	8.2717	5.06261
0.47517	0.57598	5.74938	3.12166
0.87034	0.7385	2.74294	2.89365
1.35201	1.01029	3.25037	5.68319
1.76866	1.36261	7.52966	9.57891
2.18221	1.74088	12.1527	14.1248
2.65613	2.11073	16.9249	19.2249
3.07868	2.47911	21.4094	24.4546
3.46456	2.86244	25.4952	29.2363
3.99275	3.2582	29.2303	33.15
4.72099	3.67604	31.4458	35.9087
5.5675	4.19166	31.0592	36.9318
6.56952	4.94801	28.316	35.1655
7.9541	6.0687	23.8906	29.9652
9.71094	7.55805	18.8466	22.1983
11.7583	9.28951	14.1956	14.0075
14.1124	11.1401	10.1701	7.58761
16.4763	13.105	6.86333	4.21409
18.5113	15.1443	4.31793	3.06282
20.1225	17.0292	2.16795	2.22039
21.2215	18.4631	1.2565	1.29149
21.5635	19.2376	1.46386	0.52214
21.0427	19.2788	1.59225	0.29574
19.9759	18.5881	1.63223	0.46882
18.735	17.093	1.65021	0.48013
17.6595	14.8422	1.55122	0.38129
17.3802	12.9663	1.29035	0.33145
18.7693	13.9655	0.84227	0.42264
21.1109	17.7558	0.5662	0.54003
22.7094	21.2203	0.52824	0.60624
23.202	22.4969	0.51063	0.61985
22.8782	21.6151	0.48768	0.6012
21.8817	19.3191	0.46106	0.57595
20.4613	16.4194	0.45853	0.56315
18.9595	13.6579	0.49604	0.56177
17.4971	11.5504	0.45271	0.55682
16.2555	10.474	0.3147	0.53869
15.4318	10.4101	0.20462	0.52002
15.0049	10.8055	0.22916	0.5331
14.8293	11.1482	0.47801	0.61341
14.7352	11.1862	0.91693	0.77581
14.4238	10.802	1.29859	1.00456
13.6169	10.0017	1.46016	1.26856
12.4661	8.97086	1.47322	1.50489
11.1484	7.9362	1.46956	1.63048
9.53762	7.05747	1.41511	1.61856
7.69735	6.60195	1.28627	1.51585
6.3436	6.9037	1.1669	1.38908
6.40722	8.19028	1.05716	1.30038
8.55615	10.8519	1.0697	1.30229
13.74	15.6479	1.2555	1.42285
21.9818	23.062	1.59657	1.66545
30.0891	32.3237	2.18012	2.0196
35.4428	41.0312	3.02391	2.4706
38.0445	46.0437	4.04849	3.02461
37.2195	45.3647	5.20529	3.72269
32.8153	39.0515	6.58489	4.60237
26.8085	28.7734	8.26846	5.72415
20.7041	17.5502	10.3046	7.23779
[truncated: 4,003 more rows]

## Sheet: Participant 3
Resultant linear accelerations
Left shoe		Right shoe
Motion capture system	Shoe-type IMU	Motion capture system	Shoe-type IMU
1.75378	0.56868	3.78815	4.18893
1.29578	0.56217	2.1636	4.49274
0.76898	0.55789	0.94461	4.85277
0.48322	0.5542	1.29158	5.22353
0.20024	0.55205	2.35306	5.51774
0.10544	0.55448	3.41432	5.64129
0.07828	0.56549	4.43071	5.56195
0.14182	0.58778	5.55646	5.35637
0.24386	0.61969	6.77863	5.17511
0.24135	0.65651	7.92817	5.20099
0.38211	0.69624	8.99816	5.51884
0.40171	0.7398	9.69037	5.93779
0.32825	0.78538	10.0002	6.22794
0.47659	0.82582	10.3388	6.38428
0.54525	0.85204	10.5623	6.53598
0.50657	0.85967	10.5683	6.75561
0.29988	0.85138	10.6222	6.97524
0.21431	0.83276	10.4423	7.06789
0.17724	0.80775	9.72493	6.86523
0.10811	0.77539	8.62679	6.09209
0.10136	0.73008	7.08713	4.44573
0.14032	0.66803	4.94118	2.08599
0.3908	0.59446	3.13993	3.46513
0.39869	0.52295	7.23214	8.3425
0.20892	0.4646	13.167	14.0192
0.19187	0.42655	17.0276	19.0954
0.44222	0.42874	17.8384	21.838
0.54859	0.49337	16.5656	21.4686
0.48434	0.62233	14.4442	18.4522
0.67472	0.83096	11.9792	13.7832
1.22864	1.1751	9.73141	8.91564
2.22065	1.69325	7.78462	5.45134
3.06661	2.33335	6.04947	3.77215
3.5453	2.95392	4.33947	2.83633
3.85181	3.3998	2.85513	1.98226
4.07647	3.60642	1.84504	1.30681
4.25743	3.62252	0.96935	1.12067
4.42801	3.53933	0.63366	1.26904
4.45659	3.42487	0.65417	1.38858
4.19716	3.29794	0.66305	1.39524
3.7558	3.1344	0.76663	1.33562
3.38734	2.90296	0.90974	1.2705
3.04951	2.60845	0.67359	1.23076
2.58713	2.30732	0.24846	1.20886
1.98144	2.06854	0.26338	1.18249
1.29114	1.95147	0.26555	1.14508
0.9032	2.0211	0.24388	1.10605
0.9273	2.27245	0.44383	1.07264
1.03462	2.6122	0.31495	1.04178
1.26124	2.97398	0.3657	1.00911
1.6776	3.35862	0.44637	0.98059
2.13706	3.77262	0.21313	0.96862
2.63716	4.17096	0.15498	0.97819
3.25996	4.46476	0.16224	1.00515
4.03391	4.57893	0.15665	1.04577
5.08849	4.5795	0.38924	1.09911
6.47753	4.77784	0.38966	1.16133
7.92314	5.48234	0.16867	1.22282
9.17384	6.52633	0.15106	1.27253
10.009	7.38879	0.15937	1.30503
10.2744	7.71375	0.13953	1.32071
10.161	7.48855	0.29549	1.32108
9.81594	6.88143	0.36729	1.30893
9.21952	6.08283	0.22706	1.29039
8.44006	5.20917	0.21077	1.27225
7.57393	4.2738	0.13628	1.25754
6.69184	3.29892	0.08349	1.24485
5.79678	2.41167	0.13631	1.23188
5.00374	1.78684	0.13035	1.21916
4.43373	1.51379	0.06646	1.20862
4.14784	1.50596	0.0621	1.19802
3.83452	1.52517	0.09835	1.17905
2.85435	1.59369	0.13149	1.14233
3.53912	3.07434	0.15924	1.08574
8.56006	6.83297	0.16977	1.02117
14.076	12.3303	0.19328	0.97499
17.0588	17.8386	0.21366	0.97646
16.7717	21.0085	0.28721	1.03711
14.64	20.6943	0.45681	1.13305
12.0164	17.3923	0.58009	1.21947
9.24676	12.2967	0.68476	1.28109
6.69381	6.96688	0.86431	1.35754
4.58142	3.06407	1.20732	1.5223
2.89296	1.46513	1.71942	1.82569
1.69575	1.16071	2.27757	2.23659
0.91322	0.83598	2.7686	2.66337
0.59334	0.53714	3.28844	3.02447
0.81342	0.50538	3.86966	3.29742
0.88861	0.60486	4.33695	3.50308
0.84883	0.66	4.58622	3.65811
0.77501	0.65372	4.6554	3.75994
0.40936	0.61484	4.59036	3.79437
0.08565	0.57272	4.49645	3.74777
0.09788	0.54471	4.39158	3.62086
0.45493	0.53088	4.17387	3.43648
0.59021	0.52215	3.86463	3.23928
0.14386	0.51842	3.46826	3.0724
0.22482	0.52658	3.00793	2.95643
0.14922	0.54525	2.60088	2.90845
0.25586	0.56266	2.25684	2.96032
0.32067	0.57243	1.87934	3.13217
0.17903	0.58369	1.73473	3.40307
0.42485	0.60984	2.30357	3.75008
0.30946	0.64973	3.38486	4.17524
0.21941	0.68697	4.71787	4.68175
0.36733	0.70876	6.16214	5.25438
0.23202	0.71654	7.65142	5.83895
0.3933	0.71888	9.01244	6.40653
0.32054	0.72194	9.8357	6.91128
0.29185	0.72711	10.0856	7.21102
0.25135	0.73317	10.0796	7.28223
0.4158	0.7375	9.92147	7.24971
0.42806	0.73665	9.69309	7.15922
0.2698	0.7283	9.35366	6.94879
0.12127	0.71234	8.77622	6.51324
0.09276	0.69109	7.92839	5.78347
0.19204	0.66988	6.89	4.83585
0.18327	0.65436	5.81748	3.88191
0.13614	0.6464	4.76086	3.12744
0.1067	0.64492	3.97374	2.64727
0.16277	0.64914	3.38978	2.38066
0.14442	0.65834	2.61703	2.24778
0.21046	0.66915	1.85274	2.28035
0.13131	0.6757	1.57529	2.77983
0.10394	0.67347	3.05213	4.37061
0.23305	0.66352	6.51416	7.49396
0.3147	0.65401	11.0702	11.876
0.19387	0.65398	14.5315	16.4624
0.15955	0.66348	15.6443	19.7117
0.26855	0.67351	14.8154	20.174
0.24141	0.67759	12.9566	17.4174
0.37996	0.6954	10.8342	12.6298
0.79737	0.81918	8.70887	7.88664
1.34542	1.13973	6.74679	4.68249
2.06418	1.6126	5.10333	3.10443
2.84125	2.16414	3.67202	2.20782
3.48428	2.72683	2.36401	1.40597
3.94292	3.20905	1.34485	0.82249
4.3336	3.54233	0.70958	0.79002
4.63655	3.71945	0.65042	0.99155
4.81849	3.77737	0.85788	1.09999
4.93255	3.76585	0.91765	1.1122
4.90075	3.71898	0.77275	1.09506
4.67928	3.64115	0.75107	1.09718
4.34076	3.50823	0.67547	1.12454
3.90421	3.28843	0.32714	1.15832
3.38769	2.98104	0.29249	1.18501
2.81079	2.63804	0.43034	1.20235
2.27751	2.35147	0.42535	1.21152
1.75801	2.21784	0.37174	1.20836
1.34845	2.32187	0.21587	1.18781
1.51629	2.69902	0.26179	1.15606
2.31507	3.23634	0.30514	1.12763
3.34562	3.70416	0.21119	1.11158
4.61774	3.94351	0.47587	1.10513
6.07815	4.12738	0.41879	1.09995
7.51796	4.71683	0.36339	1.09091
8.67646	5.75575	0.30664	1.07846
9.44195	6.76392	0.13765	1.0669
9.82665	7.32258	0.09172	1.06104
9.95686	7.33741	0.1091	1.06286
9.89987	6.99421	0.10643	1.07113
9.53729	6.5176	0.11386	1.08344
8.97561	5.99067	0.07758	1.09851
8.13767	5.36781	0.1342	1.11797
6.8906	4.56004	0.15129	1.14597
5.74889	3.55018	0.28361	1.18541
4.93106	2.46733	0.437	1.2337
4.12247	1.58107	0.27259	1.28239
3.42267	1.25266	0.13646	1.32241
3.05271	1.50252	0.22868	1.35069
2.76574	1.92828	0.17775	1.36986
2.61291	2.30457	0.12729	1.38262
2.66079	2.56328	0.30721	1.3895
2.64901	2.76471	0.43398	1.38892
2.83748	3.16819	0.42152	1.37776
3.84084	4.30209	0.43906	1.35336
5.89856	6.7249	0.43568	1.3143
9.35358	10.4924	0.18964	1.26278
12.9612	14.8783	0.19297	1.2102
14.911	18.4295	0.28073	1.17353
14.8254	19.525	0.32702	1.16066
13.0044	17.4718	0.40546	1.16569
10.4058	13.1585	0.40556	1.18297
7.7598	8.36129	0.5761	1.22137
5.4629	4.51069	0.84181	1.30275
3.67108	2.28158	1.16598	1.4439
2.37886	1.59912	1.58534	1.64848
1.71301	1.40617	2.00296	1.92705
1.39053	1.16732	2.40616	2.28787
1.2609	0.97057	2.95383	2.70094
1.03282	0.86964	3.66069	3.10325
0.80477	0.8013	4.23672	3.44292
0.54226	0.73772	4.50664	3.71284
0.23067	0.71362	4.70296	3.93156
0.13876	0.73839	4.91381	4.1047
0.29722	0.76663	5.03465	4.2196
0.37456	0.76039	5.03913	4.25506
0.42475	0.72288	4.93711	4.19079
0.38088	0.67553	4.78571	4.01945
0.36314	0.63167	4.50186	3.75593
0.47408	0.59293	4.00291	3.44026
0.41836	0.55572	3.29913	3.12214
0.48656	0.51844	2.47923	2.87294
0.31476	0.48593	1.97548	2.83046
0.39967	0.466	1.84565	3.0939
0.43477	0.46131	1.78796	3.55951
0.36219	0.46993	2.28143	4.02974
0.27276	0.49198	3.25439	4.3849
0.39264	0.52748	4.41143	4.62061
0.446	0.57234	5.82545	4.88195
0.50617	0.62231	7.54373	5.40074
0.33317	0.67733	9.17832	6.16219
0.18355	0.73762	10.3258	6.92214
0.1891	0.79851	10.9961	7.46142
0.16603	0.85204	11.2733	7.64173
0.21872	0.89226	11.152	7.48348
0.31512	0.92049	10.8224	7.10447
0.44991	0.94339	10.2858	6.56264
0.60404	0.96387	9.61216	5.89278
0.58176	0.97797	8.98771	5.18725
0.66899	0.97999	8.29611	4.57253
0.45004	0.96807	7.57234	4.13385
0.28358	0.94586	6.75032	3.86627
0.19068	0.91866	5.90519	3.70088
0.0463	0.88813	5.19877	3.54666
0.16262	0.85075	4.39153	3.345
0.11311	0.80161	3.54774	3.27909
0.08699	0.74165	3.41463	4.03723
0.22713	0.67955	5.07241	6.1427
0.25686	0.62773	8.56377	9.45403
0.22753	0.59861	13.063	13.6612
0.43948	0.60036	16.6581	17.993
0.54688	0.63509	18.0203	21.1841
0.4577	0.70504	17.3013	22.1851
0.62588	0.82714	15.3976	20.5217
1.04772	1.05717	13.0977	16.4631
1.7003	1.48609	10.8931	11.4063
2.53814	2.145	8.86031	7.29284
3.45448	2.93855	6.79792	5.0093
4.23851	3.69191	5.01876	3.81919
4.74645	4.24076	3.74834	2.80382
5.06561	4.50995	2.62841	1.812
5.2596	4.51012	1.45166	1.19624
5.22281	4.28456	0.64984	1.19054
4.83755	3.8916	0.56117	1.35789
4.16249	3.38272	0.99225	1.41456
3.45985	2.79139	1.0031	1.3598
2.82156	2.2113	0.72667	1.2525
2.17013	1.85035	0.58402	1.15411
1.52741	1.85225	0.54025	1.09892
1.05411	2.09217	0.32533	1.07276
1.12694	2.42975	0.08914	1.05328
1.4613	2.85761	0.18182	1.03671
1.83521	3.36952	0.3571	1.02864
2.23766	3.88434	0.37286	1.03388
2.6723	4.28892	0.22182	1.05488
3.2538	4.51257	0.17251	1.09289
4.11062	4.57139	0.23769	1.14481
5.17094	4.60455	0.15667	1.20003
6.27042	4.82653	0.09931	1.2456
7.37046	5.30996	0.21439	1.2757
8.38326	5.96055	0.42075	1.29294
9.13444	6.61379	0.40222	1.30275
9.7254	7.03296	0.15965	1.30994
10.0514	7.05416	0.07796	1.31696
9.81843	6.6682	0.09903	1.32244
9.11231	5.92412	0.09569	1.32175
8.10353	4.90038	0.1508	1.31092
7.02394	3.73555	0.24764	1.29178
6.05548	2.60526	0.23046	1.2705
5.06173	1.65116	0.22303	1.25192
4.12264	0.95799	0.3163	1.23838
3.68086	0.68242	0.10143	1.23085
3.51068	0.81467	0.09304	1.22774
3.3159	1.01566	0.08393	1.22452
3.16866	1.16419	0.07309	1.2165
2.8248	1.54558	0.15345	1.20183
2.7496	3.33171	0.27248	1.18268
5.81655	6.96437	0.14533	1.16492
10.8447	11.6769	0.24427	1.15653
14.6308	16.1003	0.19037	1.16553
15.9473	18.9191	0.13403	1.19595
14.9125	19.0452	0.13179	1.24289
12.4686	15.9869	0.19531	1.29601
9.65265	10.8197	0.36439	1.34478
6.73913	5.74644	0.43208	1.38204
4.33089	2.21919	0.52458	1.40966
2.74432	0.6241	0.65178	1.43752
1.72182	1.04046	0.72173	1.48652
1.22903	1.22879	0.89452	1.58973
1.14485	1.17915	1.26716	1.76325
1.1985	1.15245	1.73411	1.97977
1.14418	1.15744	2.15793	2.19153
1.03609	1.07028	2.44864	2.37558
0.79866	0.8726	2.67735	2.53797
0.61444	0.68311	2.97542	2.68777
0.39677	0.61921	3.33265	2.82911
0.34986	0.66541	3.60174	2.96584
0.42632	0.72855	3.7467	3.10203
0.49433	0.76149	3.80483	3.23205
0.48441	0.76836	3.8248	3.33386
0.38827	0.76626	3.76109	3.38054
0.2894	0.7656	3.51322	3.35188
0.18821	0.76936	3.20578	3.24602
0.41624	0.77691	2.9275	3.09395
0.43646	0.78293	2.63969	2.95141
0.41159	0.7784	2.28326	2.87311
0.3084	0.7579	1.8483	2.89597
0.10678	0.72562	1.44607	3.04567
0.35654	0.69527	1.19638	3.32992
0.28738	0.67846	1.17117	3.69736
0.20501	0.67571	1.29754	4.03299
0.11514	0.68281	1.77718	4.20458
0.15961	0.69653	2.69983	4.14359
0.0998	0.7141	3.92101	3.97856
0.18057	0.73337	5.51352	4.14792
0.26819	0.75508	7.365	4.98403
0.40078	0.78247	9.17036	6.15784
0.4388	0.81695	10.5856	7.22757
0.26018	0.85482	11.4146	8.00156
0.32254	0.88983	11.7723	8.41228
0.47676	0.91988	11.942	8.48739
0.23533	0.94927	11.9662	8.29489
0.20793	0.98447	11.6978	7.87552
0.20262	1.02737	11.2365	7.31576
0.269	1.07152	10.6687	6.77184
0.12944	1.10754	10.125	6.37632
0.34106	1.12847	9.41585	6.13409
0.52016	1.13052	8.34025	5.87359
0.42447	1.11363	7.05866	5.26371
0.41612	1.07799	5.48596	4.01982
0.28104	1.02498	4.84438	3.98481
0.41548	0.96481	8.71212	8.90055
0.54774	0.91515	14.6534	16.4523
0.6208	0.90202	19.3342	23.7591
0.96362	0.98293	21.4019	28.0451
1.60395	1.23538	20.8175	27.8414
2.28584	1.64465	18.4072	23.6846
2.75153	2.088	15.3164	17.3352
3.14463	2.45783	12.2833	10.9981
3.48848	2.72301	9.42478	6.64494
3.65236	2.90483	7.01533	4.54651
3.67737	3.02923	4.97838	3.27304
3.69186	3.1077	3.15342	2.06396
3.80746	3.15562	1.9303	1.09471
3.98911	3.19161	1.22138	0.80733
4.02785	3.2186	0.99295	1.0009
3.85159	3.22523	0.98341	1.16327
3.56511	3.1976	0.87389	1.2367
3.2037	3.12015	0.90432	1.26483
2.68227	2.96611	0.82324	1.2806
2.0617	2.74758	0.52844	1.29291
1.45009	2.60354	0.26297	1.30012
0.99004	2.71712	0.06607	1.30029
1.05313	3.08076	0.10798	1.29505
1.39117	3.53308	0.2205	1.289
1.81964	3.95675	0.21726	1.28441
2.36875	4.28963	0.08362	1.27853
3.20338	4.47654	0.21824	1.26747
4.48146	4.50454	0.16441	1.2525
6.02799	4.48453	0.31603	1.23995
7.48447	4.73792	0.42086	1.23473
8.63534	5.49751	0.18669	1.23726
9.35104	6.43544	0.65199	1.24565
9.8097	7.08698	0.53002	1.258
10.199	7.27376	0.16611	1.2738
10.2731	7.01783	0.20689	1.2947
9.8925	6.41667	0.39945	1.32264
9.14684	5.5952	0.40722	1.35625
8.16872	4.68243	0.45408	1.39026
7.14324	3.7637	0.30253	1.41944
6.10492	2.85023	0.25541	1.44339
5.13541	1.96563	0.2583	1.46557
4.35657	1.23075	0.14899	1.48753
3.73234	0.84135	0.28386	1.50636
3.21789	0.8423	0.269	1.51758
2.87613	0.96713	0.2573	1.5196
2.55278	1.07833	0.3582	1.51486
2.23187	1.17574	0.46154	1.5061
2.08005	1.31381	0.42143	1.49191
2.10445	1.71811	0.20226	1.46536
2.87822	3.02918	0.142	1.41874
5.36678	5.86772	0.25871	1.3526
9.79222	10.1914	0.41708	1.28036
14.4003	15.0963	0.38916	1.22438
17.2469	19.1441	0.33118	1.20711
17.4379	21.0998	0.21636	1.24154
15.3515	20.1638	0.23178	1.31555
12.4318	16.201	0.39039	1.38779
9.45088	10.4746	0.45385	1.42872
6.69657	5.21018	0.50897	1.45238
4.33148	1.93501	0.69552	1.49234
2.46786	0.96862	0.8559	1.56189
1.27343	0.91494	0.93053	1.64944
0.7069	0.71581	1.07512	1.74612
0.57315	0.59432	1.2204	1.85754
0.77465	0.63168	1.43752	1.98812
0.92007	0.67541	1.81387	2.13059
0.71761	0.67694	2.21431	2.27616
0.46323	0.66157	2.57071	2.42731
0.25359	0.64829	2.88183	2.58775
0.31141	0.63461	3.09275	2.74619
0.36529	0.61677	3.16519	2.88022
0.28521	0.59657	3.1729	2.97108
0.12093	0.57633	3.22089	3.01666
0.26371	0.55607	3.27077	3.03203
0.30753	0.53557	3.23645	3.03299
0.17969	0.51646	3.09671	3.01552
0.14746	0.49809	2.83889	2.95375
0.13409	0.47898	2.41584	2.84082
0.16984	0.46228	1.9785	2.73508
0.18656	0.45496	1.60266	2.72619
0.10858	0.46305	1.33034	2.84224
0.29803	0.48383	1.21434	3.03964
0.247	0.5068	1.12865	3.28251
0.15847	0.52507	1.08892	3.56879
0.15904	0.54359	1.09484	3.89501
0.16094	0.57479	1.32469	4.23931
0.10468	0.62067	1.69507	4.58007
0.33644	0.6678	1.97199	4.92156
0.3289	0.70137	2.18247	5.2768
0.25765	0.71601	2.41636	5.63075
0.18944	0.71563	2.66498	5.94117
0.11987	0.70883	2.88961	6.15989
0.17929	0.70505	3.12798	6.24719
0.22792	0.70987	3.50963	6.1793
0.15831	0.72234	4.23533	5.97987
0.25822	0.73562	5.32801	5.74564
0.29094	0.74136	6.54741	5.57786
0.16643	0.73907	7.66234	5.54256
0.19538	0.73727	8.49097	5.64672
0.21348	0.74312	8.83332	5.75712
0.23344	0.75659	8.89472	5.77467
0.33846	0.77489	9.08486	5.7696
0.40788	0.79753	9.40351	5.83405
0.42315	0.82413	9.62486	5.9889
0.33964	0.85116	9.69087	6.20113
0.27408	0.8715	9.59844	6.3963
0.27605	0.87704	9.27331	6.42542
0.24549	0.864	8.36304	6.05138
0.14159	0.8319	6.49309	5.00097
0.1737	0.78021	4.01027	3.36408
0.13716	0.71257	4.72727	4.54312
0.13861	0.64318	10.3931	10.0513
0.20488	0.60265	15.2339	16.6105
0.2321	0.62488	17.0176	21.7618
0.28277	0.68851	16.3437	23.3798
0.30433	0.71507	14.621	20.7482
0.24958	0.67304	12.2869	15.2871
0.32883	0.64885	9.86548	9.55746
0.50848	0.73815	7.79362	5.48981
0.55658	0.86914	5.81228	3.43014
0.52594	0.9221	3.78682	2.33815
0.45754	0.87197	2.17993	1.41142
0.4691	0.81311	1.29826	0.79268
0.67421	0.85984	0.87292	0.85969
1.07268	1.00413	0.91472	1.10882
1.42299	1.18238	1.06941	1.23777
1.57406	1.36956	1.11289	1.27498
1.65791	1.55143	0.90413	1.28532
1.83331	1.69153	0.77145	1.30359
2.01983	1.76467	0.73262	1.33123
2.02047	1.7855	0.53075	1.35648
1.93903	1.79465	0.2985	1.37035
1.94788	1.83779	0.21664	1.36866
2.00832	1.94247	0.15336	1.35253
2.16948	2.09822	0.14272	1.32672
2.46071	2.26956	0.15576	1.29594
2.75204	2.42845	0.16646	1.2656
2.89646	2.55684	0.22165	1.24172
2.83037	2.63221	0.19559	1.22602
2.69752	2.63315	0.08946	1.21392
2.53864	2.54804	0.08592	1.19895
2.23916	2.38835	0.20428	1.17822
1.84132	2.21748	0.22883	1.15454
1.46554	2.14552	0.17176	1.13493
1.18878	2.25003	0.16066	1.12706
1.20446	2.50326	0.1187	1.13531
1.74226	2.82398	0.12187	1.15935
2.70301	3.16345	0.13383	1.19525
4.02225	3.58237	0.13743	1.23759
5.69975	4.22208	0.1648	1.2831
7.37982	5.10325	0.18461	1.33268
8.75589	6.1461	0.1826	1.38655
9.78807	7.1856	0.24592	1.43878
10.4437	7.93185	0.21894	1.47915
10.7764	8.22251	0.20428	1.49973
10.9058	8.12227	0.13769	1.50186
10.7579	7.74308	0.2044	1.49596
10.1435	7.16253	0.37205	1.49038
9.20983	6.45493	0.3968	1.48367
8.13795	5.69124	0.29915	1.4689
6.83066	4.85665	0.23441	1.44219
5.5555	3.80954	0.10018	1.40624
4.41997	2.56864	0.21667	1.36393
3.07908	2.70561	0.21657	1.31095
5.52088	5.72619	0.22553	1.24079
11.0558	10.3232	0.32805	1.15871
15.63	15.5073	0.22487	1.09171
17.3522	19.426	0.27589	1.08108
16.4532	19.9967	0.44556	1.15659
14.1649	17.0362	0.81735	1.30275
11.3574	12.3385	1.2034	1.46932
8.65572	7.68885	1.54403	1.63614
6.02568	4.03433	1.76319	1.82947
3.74105	1.81895	2.06707	2.08113
2.12811	0.86692	2.47635	2.39237
1.11155	0.40816	2.90084	2.72939
0.67561	0.20373	3.47558	3.04965
0.48984	0.43743	4.15759	3.3294
0.82966	0.62009	4.60162	3.57078
0.91742	0.69185	4.70349	3.77723
0.85355	0.68952	4.68236	3.93155
0.60771	0.65133	4.76067	4.00955
0.38485	0.60959	4.73526	3.99326
0.3619	0.5867	4.47719	3.87531
0.20916	0.57932	4.14876	3.67282
0.1903	0.56423	3.86066	3.43567
0.31039	0.52653	3.64551	3.23457
0.4429	0.47651	3.36547	3.12115
0.20211	0.43819	3.08026	3.09935
0.18238	0.42396	2.81827	3.14592
0.19696	0.42312	2.51833	3.24552
0.23237	0.42134	2.15374	3.4155
0.31528	0.42236	1.82456	3.70517
0.18557	0.44039	1.82083	4.16986
0.15436	0.47874	2.2705	4.8114
0.25225	0.5262	3.18475	5.51631
0.21829	0.57399	4.48142	6.07261
0.26699	0.62349	6.12581	6.3219
0.04884	0.67726	8.06276	6.47189
0.26939	0.73019	10.0113	7.03959
0.36667	0.77181	11.3998	8.02862
0.2937	0.79792	12.0558	8.8626
0.32743	0.81463	12.2592	9.10939
0.16881	0.82916	12.2242	8.75057
0.15196	0.84095	11.9259	8.09153
0.13044	0.84339	11.449	7.43125
0.20763	0.83326	10.9538	6.82567
0.35851	0.81627	10.2775	6.19319
0.3047	0.8017	9.47742	5.46488
0.18901	0.79468	8.62365	4.65694
0.24899	0.79523	7.54959	3.88514
0.2803	0.80008	6.42678	3.3
0.25854	0.80321	5.51015	2.9519
0.19227	0.79742	4.57239	2.74866
0.15342	0.77779	3.18085	2.87141
0.2131	0.74286	3.72483	4.52799
0.28855	0.69718	8.25499	8.70282
0.42967	0.66232	14.0607	14.8861
0.49684	0.68077	18.6275	21.524
0.73066	0.77683	20.193	26.3733
0.96363	0.92584	18.9152	27.3062
1.11069	1.11035	16.3531	23.681
1.36977	1.35665	13.6953	17.1821
1.85676	1.69616	11.0798	10.7311
2.44739	2.10643	8.61745	6.45159
2.94751	2.51824	6.40619	4.48669
3.33996	2.87811	4.42035	3.36915
3.61377	3.15403	2.97909	2.22751
3.79497	3.31526	1.96943	1.27787
3.91452	3.35589	1.20906	1.03793
3.95615	3.29759	0.81088	1.2414
3.88058	3.16175	0.96521	1.37145
3.6951	2.96866	1.12077	1.37815
3.40183	2.74864	1.02696	1.32212
2.98639	2.53621	0.80312	1.25547
2.56421	2.35194	0.6411	1.21056
2.17387	2.20677	0.51153	1.1911
1.74995	2.13743	0.16942	1.18464
1.31672	2.20248	0.08597	1.18103
1.00121	2.42062	0.20015	1.17914
0.99979	2.74767	0.48057	1.18322
1.31482	3.122	0.62089	1.19745
1.96324	3.47684	0.3914	1.22483
3.02221	3.7425	0.6918	1.26403
4.39959	3.90046	0.57331	1.30555
5.71821	4.04174	0.31825	1.33591
6.97777	4.41977	0.24403	1.3482
8.01374	5.20253	0.38913	1.34616
8.66942	6.11239	0.30617	1.33802
9.23521	6.75829	0.16041	1.33051
9.7043	6.98277	0.15385	1.32716
9.80015	6.8078	0.17873	1.32802
9.50947	6.3226	0.11205	1.33015
8.96217	5.63467	0.31072	1.3294
8.25567	4.85542	0.39369	1.32392
7.37781	4.06261	0.30263	1.31553
6.36825	3.27679	0.37278	1.30832
5.57255	2.53905	0.22695	1.30763
4.95443	1.95351	0.18348	1.31749
4.34069	1.60579	0.22498	1.337
4.03906	1.50048	0.19187	1.36195
3.9345	1.59057	0.19982	1.3903
3.57986	1.81133	0.20812	1.42278
3.21347	2.06239	0.05741	1.45829
2.94839	2.23575	0.08937	1.49074
2.61387	2.35394	0.16349	1.51057
3.14074	3.07317	0.30153	1.50946
5.8618	5.58943	0.27523	1.484
9.97263	9.95191	0.08463	1.43996
14.104	15.0261	0.1532	1.39612
17.0855	19.1547	0.31178	1.37521
17.7482	21.0336	0.36493	1.38509
15.9941	20.0006	0.24356	1.40973
13.117	16.0857	0.18045	1.42057
10.06	10.5383	0.30094	1.40611
7.07197	5.40951	0.41355	1.39459
4.28667	2.02675	0.77871	1.44335
2.22532	0.65768	1.23579	1.59222
1.20213	0.75076	1.63084	1.83434
0.78546	0.75089	2.18762	2.15465
0.58016	0.64779	2.80726	2.54049
0.9474	0.56798	3.38607	2.94751
1.04374	0.51683	3.9676	3.30799
0.90022	0.49367	4.39336	3.57118
0.68906	0.51184	4.62504	3.73064
0.49281	0.55542	4.70255	3.81378
0.41423	0.59839	4.61859	3.85026
0.22156	0.63313	4.55131	3.85649
0.09034	0.65892	4.47353	3.83102
0.15802	0.6733	4.27485	3.76009
0.19914	0.67445	3.9787	3.63555
0.19536	0.66081	3.62235	3.46769
0.14333	0.63066	3.24755	3.28223
0.02691	0.58577	2.73072	3.10522
0.16536	0.53589	2.06582	2.97991
0.09193	0.49421	1.38844	3.00111
0.27703	0.4656	1.18043	3.24262
0.2139	0.44344	1.42092	3.65719
0.14246	0.4188	1.66397	4.15064
0.12503	0.39215	2.11122	4.69171
0.19153	0.3741	2.78244	5.27741
0.27498	0.37508	3.53365	5.84366
0.21752	0.39845	4.44746	6.25991
0.22946	0.43995	5.50059	6.41699
0.2914	0.48858	6.65974	6.38241
0.23781	0.53258	7.91915	6.44108
0.21806	0.56841	8.96463	6.78189
0.21454	0.60185	9.64563	7.22313
0.3044	0.64031	10.082	7.42348
0.24496	0.68491	10.2011	7.20789
0.15005	0.7298	9.93813	6.66788
0.30532	0.7694	9.41016	6.02191
0.34075	0.80065	8.84322	5.41649
0.39871	0.82	8.25128	4.84234
0.50078	0.82684	7.5663	4.21492
0.3885	0.82515	6.86999	3.52578
0.3159	0.81783	6.12952	2.88755
0.16452	0.80295	5.46231	2.45317
0.13881	0.77672	5.03306	2.31729
0.23453	0.73856	4.61527	2.41413
0.18317	0.6902	3.75705	2.51612
0.23004	0.63205	2.76792	2.89114
0.18314	0.56569	4.92733	5.25443
0.26018	0.49759	10.404	10.1218
0.28612	0.44285	15.0446	16.1993
0.15599	0.43334	16.7382	21.3361
0.38909	0.49733	16.028	23.2303
0.41458	0.59676	14.4043	20.952
0.37676	0.66409	12.5904	15.8256
0.59196	0.69968	10.5419	10.4
0.6621	0.75185	8.36005	6.57224
0.51882	0.82215	6.27499	4.51975
0.35798	0.85794	4.44944	3.18039
0.21322	0.82624	2.91397	1.93241
0.17761	0.77468	1.64008	1.03492
0.32213	0.76653	0.68688	1.03366
0.41522	0.79063	0.65871	1.34134
0.44165	0.83167	1.0291	1.47886
0.58287	0.91492	1.21392	1.46419
0.90864	1.0562	1.06707	1.39306
1.245	1.23688	0.68678	1.33886
1.55006	1.43469	0.2796	1.32427
1.79853	1.63122	0.24785	1.33254
1.91271	1.80052	0.2289	1.34199
2.0243	1.92113	0.23278	1.33774
2.15293	1.98934	0.18438	1.31373
2.2908	2.01734	0.10267	1.27489
2.3334	2.02391	0.21681	1.23508
2.3193	2.02428	0.298	1.21112
2.30627	2.02993	0.23891	1.20706
2.25344	2.05196	0.14877	1.21032
2.25251	2.09868	0.0812	1.20931
2.26899	2.16825	0.16235	1.20548
2.19821	2.2449	0.16934	1.20977
2.01784	2.30925	0.13572	1.22813
1.77576	2.3509	0.26136	1.2544
1.6285	2.37863	0.22479	1.27866
1.67554	2.41852	0.17237	1.29624
1.80934	2.4756	0.29642	1.3075
2.21175	2.5005	0.39039	1.31385
3.02351	2.4515	0.25261	1.31672
4.13081	2.49381	0.23302	1.31792
5.40541	2.97335	0.34926	1.32015
6.53421	3.84383	0.28303	1.32718
7.30325	4.72817	0.16895	1.34059
7.80137	5.37562	0.08115	1.35533
8.18432	5.75573	0.11872	1.3618
8.49267	5.96231	0.10517	1.35563
8.69066	6.06896	0.20574	1.34377
8.70386	6.0883	0.30599	1.33741
8.48444	6.00602	0.26557	1.34129
8.03252	5.80112	0.16361	1.35326
7.51388	5.46405	0.12603	1.3709
6.79575	5.00097	0.13192	1.39386
5.69249	4.39772	0.1231	1.42082
4.32496	3.54515	0.21166	1.44683
2.93192	2.33733	0.3373	1.46471
2.57603	2.02716	0.29202	1.46952
5.24074	4.67729	0.15218	1.46067
9.18264	8.49594	0.19989	1.44118
13.0348	12.4935	0.20285	1.42036
15.6474	15.9562	0.11237	1.41706
15.9912	17.8335	0.33989	1.44759
14.1123	17.0222	0.562	1.50578
11.4515	13.5677	0.69995	1.57083
8.91693	8.85841	0.91928	1.64024
6.51361	4.54008	1.36977	1.74124
4.39984	1.70112	1.81472	1.90584
2.54885	0.70907	2.24501	2.14341
1.23608	0.57083	2.81296	2.45629
0.6658	0.37365	3.55036	2.87326
0.70648	0.382	4.39484	3.41908
0.88095	0.5265	5.15852	4.05232
0.89113	0.61547	5.72522	4.6653
0.71824	0.6297	6.20335	5.14354
0.59779	0.59357	6.59767	5.4203
0.51229	0.54432	6.72925	5.46711
0.49187	0.51262	6.51451	5.27426
0.39197	0.5051	6.01932	4.87746
0.27739	0.51365	5.26079	4.34254
0.1879	0.52766	4.36702	3.73574
0.1307	0.53928	3.60256	3.1871
0.16932	0.5473	2.99995	2.89894
0.22896	0.55758	2.44264	2.9651
0.23895	0.57779	1.96366	3.30052
0.24002	0.60651	1.84047	3.83138
0.19948	0.63152	2.19888	4.53432
0.18632	0.64015	2.95641	5.31086
0.2134	0.63221	4.02583	5.95943
0.14457	0.62347	5.36586	6.29641
0.04544	0.62891	6.99571	6.38459
0.122	0.64737	8.78703	6.63744
0.1719	0.66949	10.4016	7.40222
0.19528	0.69068	11.6066	8.4376
0.12959	0.71192	12.3665	9.18622
0.16937	0.73428	12.7312	9.37703
0.21153	0.75744	12.7916	9.16329
0.52884	0.78065	12.6502	8.77313
0.67794	0.80261	12.1689	8.24586
0.49129	0.82031	11.4956	7.49641
0.52333	0.83118	10.8709	6.46675
0.5137	0.8385	9.9365	5.2506
0.30721	0.84927	8.57983	4.06282
0.1797	0.86609	7.09441	3.03129
0.08451	0.88319	5.71869	2.01321
0.09975	0.88826	4.40278	0.93976
0.13498	0.86931	2.55963	2.73569
0.22313	0.82112	2.48301	6.81534
0.33636	0.75336	7.83191	12.1066
0.16976	0.69692	14.2433	17.7251
0.18718	0.68206	18.3983	22.4619
0.22239	0.69909	19.2436	24.5501
0.27115	0.70217	17.8529	22.5227
0.3521	0.67851	15.4056	17.1559
0.49167	0.73622	12.6924	11.2416
0.93281	1.02525	10.3473	7.21344
1.53296	1.5124	8.57106	5.82219
2.40477	2.10229	7.20344	5.69634
3.37417	2.75493	5.98759	5.20796
4.18533	3.42217	4.79828	4.07224
4.78753	3.99787	3.57339	2.74455
5.20631	4.37393	2.29946	1.76253
5.43233	4.49492	1.3156	1.37948
5.46173	4.37083	0.83995	1.36447
5.19431	4.07442	0.98183	1.44518
4.7484	3.70379	1.25534	1.51547
4.33284	3.33361	1.23361	1.52109
3.87235	2.989	0.772	1.46853
3.3081	2.66044	0.42429	1.40231
2.6276	2.37046	0.38441	1.36473
1.98428	2.21042	0.34366	1.35817
1.39342	2.25586	0.18337	1.35269
1.06454	2.46266	0.16893	1.3299
1.56431	2.74899	0.25764	1.29432
2.59019	3.10737	0.21936	1.26261
4.07611	3.60609	0.049	1.24864
5.83458	4.30123	0.20035	1.25128
7.52439	5.15125	0.19213	1.25813
8.90761	6.10771	0.10547	1.25939
9.91802	7.06629	0.06905	1.25448
10.5604	7.75994	0.14699	1.24832
10.8645	7.99216	0.15968	1.24594
10.8708	7.78476	0.22491	1.25016
10.5569	7.24375	0.31318	1.26159
9.83447	6.47343	0.25152	1.27922
8.87207	5.58119	0.24315	1.30103
7.86624	4.66486	0.17474	1.32497
6.84496	3.76787	0.21714	1.35019
5.86556	2.86986	0.29926	1.37778
4.94207	1.98079	0.28989	1.40858
4.10079	1.20498	0.20212	1.43991
3.46724	0.71192	0.23142	1.46523
2.91677	0.75672	0.20476	1.47668
2.50719	1.34959	0.20832	1.46999
2.62085	2.48307	0.21882	1.44777
3.72032	4.30719	0.2029	1.41642
6.61196	6.90556	0.20561	1.38049
10.7444	10.2722	0.12885	1.34074
14.6525	14.1338	0.23379	1.30024
16.7292	17.5009	0.27373	1.27434
16.3756	18.9958	0.29859	1.28425
14.3326	18.0034	0.327	1.33001
11.5976	14.89	0.53365	1.38234
8.72115	10.4214	0.80283	1.41801
5.69803	5.74472	0.8933	1.44485
3.21781	2.17762	0.89721	1.48298
1.75443	0.36072	0.9221	1.5401
0.71897	0.31465	1.11123	1.61413
0.24653	0.20334	1.4829	1.71232
0.53696	0.19037	1.87047	1.85872
0.77526	0.40927	2.30585	2.08934
0.76057	0.56151	2.94939	2.43627
0.68304	0.63743	3.60971	2.88363
0.54285	0.65896	4.06772	3.34988
0.20774	0.65636	4.39638	3.73876
0.06006	0.65207	4.6819	3.99124
0.22452	0.64994	4.85284	4.09879
0.25434	0.64476	4.79963	4.08384
0.05046	0.634	4.52598	3.97252
0.20915	0.62045	4.2319	3.7883
0.20969	0.60766	3.98231	3.54383
0.11606	0.59363	3.53646	3.24273
0.08261	0.5696	2.8678	2.92831
0.18223	0.52954	2.17954	2.71765
0.20412	0.48219	1.5346	2.73809
0.1356	0.44666	1.38902	3.02477
0.11752	0.43451	1.92838	3.55336
0.07693	0.44153	2.68394	4.27968
0.30365	0.45848	3.58851	5.08262
0.41217	0.48158	4.58924	5.77109
0.25606	0.51078	5.68173	6.18043
0.21176	0.54539	6.85845	6.3172
0.14044	0.58355	7.94137	6.41203
0.10261	0.62496	8.82644	6.70327
0.34372	0.66983	9.51467	7.1291
0.37755	0.71462	9.8803	7.36728
0.26292	0.75248	9.87871	7.22185
0.19281	0.77719	9.65858	6.82762
0.15868	0.78672	9.29849	6.4213
0.31584	0.7831	8.81058	6.07546
0.35109	0.76928	8.20927	5.72208
0.27386	0.74848	7.61606	5.29473
0.19902	0.72352	7.0511	4.81032
0.18357	0.69481	6.41428	4.33394
0.29287	0.6614	5.71267	3.85574
0.16254	0.62234	4.95414	3.25978
0.12397	0.5766	3.8408	2.98075
0.14747	0.52457	3.45644	5.01353
0.19954	0.47354	6.42507	9.33342
0.15591	0.44381	10.3899	14.1219
0.07723	0.46046	12.9966	17.4942
0.29227	0.51905	13.6835	18.3013
0.27249	0.5721	13.0415	16.5158
0.16011	0.58571	11.7556	12.9355
0.26037	0.58548	10.2672	8.98454
0.23461	0.63028	8.79699	6.13584
0.21953	0.73307	7.32601	4.6794
0.34556	0.84981	5.94797	3.8457
0.56185	0.9585	4.79751	3.13087
0.76775	1.07958	3.78096	2.45502
1.08778	1.22211	2.84821	1.90279
1.36443	1.35755	1.95011	1.55083
1.44798	1.44862	1.03261	1.40307
1.49291	1.48064	0.49889	1.3975
1.56593	1.4668	0.91006	1.4505
1.5508	1.43481	1.1435	1.50609
1.54508	1.4152	1.19054	1.51743
1.63991	1.43417	1.05608	1.46581
1.71639	1.50873	0.76354	1.3789
1.80006	1.63978	0.43232	1.29933
1.94332	1.80156	0.22347	1.25967
1.99744	1.94243	0.14853	1.25943
1.95819	2.00696	0.29558	1.26872
1.91687	1.97122	0.38875	1.26399
1.75349	1.86355	0.35242	1.24259
1.45026	1.74896	0.2663	1.21761
1.11688	1.68751	0.19869	1.2056
0.81874	1.70095	0.16652	1.21259
0.56337	1.78728	0.12413	1.23222
0.4733	1.94779	0.19807	1.25631
0.60013	2.17521	0.17993	1.28125
0.83429	2.43729	0.15529	1.30526
1.17843	2.68999	0.17709	1.325
1.64183	2.90097	0.15427	1.33589
2.19574	3.05209	0.07337	1.33737
2.91974	3.14855	0.03572	1.33663
3.90214	3.24171	0.10909	1.34268
5.03804	3.4285	0.09581	1.35645
6.07606	3.85788	0.06438	1.36983
6.86163	4.54267	0.15786	1.3752
7.34811	5.18471	0.17796	1.37192
7.50091	5.48959	0.15923	1.36404
7.38801	5.39252	0.16713	1.35644
7.15262	4.97092	0.1592	1.3529
6.68394	4.35849	0.16308	1.35496
5.98015	3.69877	0.08473	1.36203
5.17507	3.10496	0.06952	1.37331
4.3532	2.63864	0.05774	1.38976
3.66586	2.30296	0.0954	1.41384
3.10039	2.0801	0.24992	1.44625
2.64083	1.95881	0.21513	1.48113
2.07818	1.99234	0.15037	1.50643
2.34444	2.61365	0.09522	1.51219
4.89844	4.56513	0.19002	1.49646
8.35415	7.91869	0.21967	1.46715
10.9666	11.9359	0.09381	1.44339
11.8693	15.2161	0.30175	1.44421
11.0803	16.2049	0.38399	1.46602
9.35393	14.2592	0.42127	1.48443
7.43405	10.2574	0.43388	1.49033
5.44517	5.88591	0.51436	1.50887
3.62813	2.56807	0.83801	1.57395
2.33846	1.4875	1.16427	1.69721
1.61999	1.74955	1.56318	1.86788
1.43019	1.63386	2.06361	2.07518
1.2464	1.26563	2.53163	2.30907
1.08812	0.98878	2.90973	2.55334
0.91254	0.88394	3.33018	2.80482
0.61748	0.79997	3.79444	3.06754
0.39709	0.6899	4.05546	3.32692
0.47216	0.62912	4.20353	3.55803
0.52826	0.64966	4.43487	3.74918
0.33199	0.6986	4.6511	3.90698
0.33242	0.73372	4.72637	4.03637
0.41776	0.75054	4.65674	4.12241
0.36195	0.75612	4.55266	4.13792
0.39582	0.75308	4.47374	4.05357
0.25874	0.73833	4.19801	3.85126
0.24694	0.70863	3.72277	3.55716
0.19619	0.66772	3.13702	3.26304
0.03735	0.6265	2.42504	3.0992
0.10158	0.59493	1.8197	3.16377
0.12142	0.57445	1.49048	3.4958
0.26053	0.56088	1.62263	4.07655
0.416	0.55264	2.28646	4.78098
0.44512	0.55207	3.30583	5.37867
0.35641	0.56189	4.67123	5.64829
0.42094	0.58327	6.43285	5.63278
0.49748	0.61475	8.41758	5.85312
0.12936	0.6503	10.2577	6.85082
0.20989	0.68196	11.7279	8.32091
0.28202	0.70749	12.7481	9.47388
0.43818	0.73322	13.3174	9.90298
0.29342	0.7701	13.422	9.7539
0.26279	0.82585	13.2332	9.34033
0.58412	0.89645	13.0178	8.84268
0.6687	0.9665	12.5579	8.30592
0.56866	1.01946	11.587	7.71659
0.45369	1.0478	10.4453	7.06152
0.2635	1.0533	9.43952	6.29071
0.2304	1.03982	8.19906	5.161
0.2096	1.0079	6.2276	3.23721
0.1004	0.95203	3.60445	3.04695
0.23101	0.86691	6.05136	9.17572
0.27132	0.76167	12.994	17.6665
0.36306	0.66224	18.6041	25.6633
0.31392	0.59859	20.9712	30.0739
0.48283	0.59014	20.4074	29.2469
0.68674	0.6401	18.0961	23.9692
0.82301	0.7573	15.084	16.5781
1.0783	0.98454	12.1186	9.74608
1.47742	1.35095	9.58202	5.65926
1.98978	1.80832	7.41698	4.35407
2.49917	2.27342	5.61054	3.65628
2.99685	2.68973	4.17025	2.71864
3.52649	3.04708	3.11776	1.83048
3.97765	3.34675	2.20273	1.37539
4.28796	3.56595	1.35719	1.32074
4.50402	3.67452	1.0693	1.37585
4.54239	3.65155	1.09397	1.42541
4.32172	3.48762	0.96544	1.44973
3.88473	3.20084	0.93924	1.44593
3.40876	2.84732	0.89177	1.42319
2.95282	2.51183	0.76119	1.39664
2.45265	2.26835	0.5199	1.37082
1.94102	2.15215	0.28127	1.34015
1.48196	2.18032	0.36992	1.30593
1.12538	2.34247	0.42305	1.27675
0.85353	2.57511	0.48751	1.25476
0.95664	2.78857	0.48759	1.23298
1.68749	2.92677	0.71041	1.20703
2.82803	3.04045	0.64726	1.18445
4.25748	3.34606	0.59944	1.17755
5.828	4.02719	0.61862	1.18853
7.2611	4.9434	0.35741	1.2087
8.47943	5.87007	0.15007	1.23143
9.42317	6.64962	0.16798	1.25875
9.98456	7.10037	0.06684	1.29422
10.2058	7.13006	0.04259	1.33339
10.0126	6.80393	0.12732	1.36596
9.50431	6.21577	0.15653	1.3891
8.83346	5.4297	0.15274	1.41226
7.95125	4.52336	0.21032	1.4444
6.9756	3.60533	0.17986	1.48115
6.00372	2.76553	0.26353	1.50846
5.18772	2.04155	0.33399	1.51646
4.5417	1.50847	0.37087	1.50638
3.93792	1.31164	0.32369	1.48639
3.58007	1.4259	0.23352	1.4657
3.5133	1.66661	0.14138	1.44947
3.40863	1.92901	0.11039	1.43581
3.03863	2.19924	0.06335	1.41786
2.81776	2.71501	0.2313	1.39006
3.87026	4.06567	0.33229	1.35436
6.58872	6.7008	0.3341	1.31978
10.4315	10.6375	0.24162	1.29729
14.4045	15.2221	0.32991	1.29886
16.8966	19.1403	0.51312	1.33267
16.771	21.0283	0.70077	1.39166
14.6053	19.9821	0.83168	1.45827
11.8301	16.0252	0.87264	1.52847
9.0451	10.5288	0.9564	1.61878
6.24267	5.4992	1.17038	1.74563
3.86722	2.12868	1.43486	1.91089
2.26386	0.4539	1.84749	2.11955
1.24648	0.34157	2.5315	2.40264
0.5189	0.46145	3.10542	2.79446
0.5848	0.58547	3.54175	3.28202
0.82411	0.80136	4.12194	3.79638
0.76834	0.98446	4.8119	4.26205
0.71033	1.03743	5.36661	4.64476
0.52589	0.95733	5.73412	4.92938
0.45322	0.80887	6.01969	5.08253
0.33679	0.68569	6.00769	5.06949
0.33399	0.64613	5.70177	4.87089
0.28673	0.66297	5.34548	4.49241
0.32429	0.67889	4.85043	3.99527
0.35391	0.65796	4.12761	3.47766
0.37288	0.59754	3.29202	3.04805
0.44142	0.52418	2.54711	2.87775
0.24309	0.47951	1.98267	3.1046
0.3392	0.49808	1.8965	3.59695
0.38546	0.56263	2.77668	4.08112
0.29787	0.62655	4.32967	4.42407
0.43345	0.66731	6.25626	4.75794
0.21957	0.69429	8.28256	5.45136
0.31095	0.73235	10.0979	6.66375
0.33227	0.79206	11.4533	7.96912
0.29149	0.85911	12.393	8.92739
0.22958	0.91428	13.115	9.48215
0.13696	0.95005	13.4807	9.7529
0.32556	0.96875	13.3482	9.81467
0.28417	0.97423	13.0595	9.63395
0.63221	0.97016	12.8122	9.14269
0.62795	0.96054	12.2808	8.37091
0.2796	0.94816	11.223	7.44428
0.26316	0.93408	9.78017	6.46047
0.04532	0.9173	8.10521	5.36357
0.22837	0.89422	6.25058	4.01383
0.31473	0.85875	4.42047	3.04328
0.32849	0.80615	3.66567	4.90211
0.38511	0.74078	6.50485	9.05593
0.30544	0.67826	12.3521	14.1216
0.40743	0.64077	17.5854	19.2979
0.40747	0.6489	19.8532	23.2818
0.464	0.70865	19.8624	24.5933
0.58821	0.81056	18.5456	22.9834
0.73108	0.95941	16.4158	19.3269
1.10172	1.20138	13.8186	14.5102
1.87353	1.61337	11.1334	9.62699
2.85502	2.26938	8.89039	6.10503
3.90515	3.16196	7.04993	4.48253
4.92419	4.14683	5.40507	3.73591
5.73533	4.98448	4.01913	2.91188
6.19024	5.43305	2.75981	1.95038
6.16916	5.3569	1.73661	1.24393
5.71985	4.77744	1.31606	1.12911
4.93431	3.85274	1.14023	1.28421
3.93887	2.85263	1.17571	1.35378
2.95633	2.07867	1.15399	1.30184
2.11267	1.7469	0.98166	1.20571
1.51574	1.87912	0.81245	1.15467
1.27656	2.26926	0.65755	1.16807
1.41411	2.72149	0.35281	1.19871
1.99668	3.14314	0.16694	1.21812
2.80772	3.49459	0.16883	1.23205
3.80855	3.77404	0.39412	1.25205
5.10385	4.08427	0.23622	1.28006
6.57457	4.61205	0.08905	1.31246
7.90397	5.36624	0.20224	1.34735
8.92417	6.1858	0.40686	1.38533
9.66507	6.88344	0.54382	1.42788
10.0432	7.24807	0.49695	1.47292
9.9812	7.18935	0.36608	1.51307
9.62535	6.78878	0.32754	1.54019
9.16222	6.14681	0.28595	1.54917
8.5449	5.32412	0.32472	1.53937
7.67373	4.39567	0.37202	1.51527
6.57756	3.46964	0.07207	1.48403
5.397	2.63061	0.19276	1.45146
4.34398	1.91508	0.16238	1.4197
3.69447	1.45783	0.13399	1.38909
3.42504	1.48595	0.20336	1.36231
3.1499	1.80861	0.27782	1.34268
2.96828	2.08062	0.22571	1.32946
2.9039	2.23318	0.06319	1.31843
2.69568	2.46143	0.22311	1.30544
3.04635	3.16042	0.25171	1.28876
4.79482	4.74116	0.21404	1.26982
8.13749	7.45559	0.37588	1.25286
12.2449	11.2011	0.25034	1.24455
15.146	15.1037	0.15311	1.25341
15.7815	17.7637	0.23643	1.28799
14.3078	18.1953	0.26267	1.35063
11.353	16.1478	0.43924	1.42899
8.31932	12.0185	0.51052	1.49987
5.98319	7.07818	0.7142	1.55042
3.92645	3.01814	0.85695	1.58821
2.20261	0.77899	0.89906	1.62661
0.98565	0.42594	0.92178	1.6717
0.41472	0.47277	0.98966	1.72578
0.45261	0.50957	1.13147	1.79492
0.64472	0.61221	1.3229	1.88596
0.74067	0.6713	1.5506	1.99791
0.71938	0.66823	1.8625	2.1197
0.74602	0.63545	2.13786	2.23785
0.55926	0.60499	2.24229	2.34603
0.3197	0.58846	2.38043	2.44101
0.2231	0.57847	2.58283	2.51537
0.23489	0.56359	2.63552	2.5641
0.12769	0.54507	2.52225	2.59186
0.19398	0.54441	2.37833	2.61356
0.3435	0.57579	2.22985	2.64901
0.24842	0.61783	2.14483	2.7074
0.2286	0.63776	2.11747	2.77604
0.20161	0.62769	2.08064	2.83276
0.1962	0.61185	2.07686	2.8723
0.23733	0.61673	2.04013	2.91457
0.08798	0.63879	1.76997	2.98514
0.14967	0.65537	1.37217	3.09197
0.14891	0.65395	1.03761	3.22456
0.11554	0.6412	0.78854	3.37703
0.08915	0.63069	0.67012	3.55638
0.07014	0.62761	0.88352	3.77383
0.11618	0.62709	1.1646	4.04634
0.19476	0.62474	1.41332	4.37982
0.12443	0.6232	1.70504	4.74979
0.17151	0.62639	2.06842	5.12252
0.1912	0.63241	2.51638	5.47777
0.17811	0.63576	2.95097	5.78703
0.18886	0.63531	3.32526	5.96647
0.17351	0.63794	3.86134	5.90965
0.17642	0.65164	4.91016	5.61349
0.15013	0.67653	6.59861	5.26431
0.07695	0.70693	8.52938	5.32041
0.22591	0.74066	10.1319	6.17147
0.17742	0.78031	11.3324	7.45868
0.27077	0.82624	12.2008	8.61223
0.47664	0.87209	12.7963	9.4103
0.326	0.90795	13.2153	9.86878
0.32007	0.92774	13.3052	10.0266
0.33119	0.93085	12.7875	9.78982
0.24436	0.91784	11.592	8.89949
0.22557	0.88743	9.57398	6.93651
0.19982	0.83636	6.47848	4.09839
0.145	0.76422	5.88254	6.18881
0.0795	0.68128	10.6826	13.4733
0.10803	0.60523	15.2998	20.7355
0.1527	0.55241	17.2344	24.9898
0.19657	0.53445	16.84	24.8212
0.24244	0.55527	15.5279	20.8856
0.30855	0.61055	13.7202	15.1196
0.56553	0.69982	11.6455	9.80661
0.99195	0.84772	9.73736	6.69836
1.47426	1.10986	7.9857	5.50939
2.19724	1.54905	6.53493	4.74305
3.01678	2.15952	5.40474	3.81298
3.58953	2.82988	4.29585	2.78555
4.01087	3.4032	3.12791	1.9239
4.39057	3.75678	2.03428	1.42927
4.61205	3.86291	1.12868	1.29513
4.67241	3.78915	0.68314	1.3567
4.50807	3.62845	0.72844	1.45589
4.10737	3.43504	0.78893	1.50954
3.70335	3.20758	0.81214	1.49911
3.38183	2.91702	0.64402	1.45518
2.87813	2.56667	0.39867	1.41739
2.08494	2.23131	0.25725	1.39986
1.3012	2.02581	0.22268	1.39386
0.98373	2.00745	0.15906	1.38773
1.44082	2.15538	0.1164	1.37764
2.38323	2.44738	0.21766	1.36545
3.59781	2.86893	0.28308	1.35429
4.88159	3.38691	0.31214	1.34677
6.09172	3.94999	0.23137	1.3453
7.12648	4.56106	0.11999	1.35318
7.83688	5.21681	0.1679	1.37305
8.27659	5.7894	0.40479	1.40222
8.56314	6.16279	0.38019	1.43272
8.81632	6.31988	0.31787	1.4589
9.19057	6.26952	0.48938	1.4805
9.25446	6.02472	0.34296	1.49932
8.71674	5.61389	0.19144	1.51976
7.85934	5.08125	0.24734	1.54851
6.95029	4.45324	0.37048	1.58682
6.16651	3.71654	0.32692	1.62686
5.43431	2.88959	0.10323	1.65904
4.58006	2.09103	0.01649	1.68035
3.69823	1.52078	0.11053	1.69402
2.96381	1.37305	0.26172	1.70397
2.43997	1.63933	0.27377	1.71227
2.2362	2.13763	0.1614	1.71906
2.47697	2.69511	0.29782	1.7229
2.8493	3.18489	0.1363	1.72188
3.0529	3.61861	0.27433	1.71491
3.56959	4.29571	0.4364	1.70277
5.39332	5.80138	0.56678	1.68664
8.24934	8.57332	0.63842	1.66882
11.4024	12.366	0.72003	1.65726
14.2215	16.2122	0.9587	1.66647
15.4401	18.7799	1.29556	1.71977
14.4161	18.8772	1.78145	1.86385
12.0291	16.1887	2.29956	2.17713
9.54085	11.7617	2.93895	2.71229
7.06511	7.2979	3.78497	3.41787
4.69681	3.90454	4.75478	4.16511
2.89978	1.92375	5.65434	4.84518
1.79489	1.29411	6.48993	5.43245
1.13046	1.09609	7.23374	5.93719
0.86638	0.78076	7.73488	6.327
0.9191	0.50461	7.96578	6.52675
1.06903	0.47302	7.87354	6.44959
1.00374	0.54985	7.4383	6.03643
0.63847	0.58464	6.74648	5.31533
0.35429	0.55849	5.78203	4.43
0.23583	0.49681	4.59096	3.61771
0.52921	0.44379	3.36229	3.14186
0.57836	0.42685	2.39011	3.23351
0.27809	0.43822	2.21439	3.94379
0.34899	0.4527	3.03495	4.98342
0.35397	0.45765	4.62047	5.92888
0.25456	0.46015	6.66539	6.51939
0.42537	0.47208	8.92311	6.94222
0.14065	0.49791	11.0222	7.71991
0.20576	0.53386	12.5087	8.91108
0.38015	0.57418	13.3756	9.97035
0.09083	0.61636	13.7829	10.4024
0.52148	0.66041	13.7882	10.1281
0.36583	0.7039	13.5169	9.46109
0.31416	0.7415	13.0331	8.73583
0.215	0.77031	12.3027	8.01579
0.25175	0.79062	11.3062	7.21106
0.19495	0.80321	10.0572	6.27916
0.25622	0.80842	8.71756	5.29772
0.46147	0.80665	7.38336	4.41348
0.46511	0.79978	6.05245	3.7783
0.31825	0.7901	4.90471	3.57001
0.22176	0.77723	4.10318	3.82622
0.2184	0.75799	3.71108	4.3527
0.21202	0.72882	3.73205	5.06287
0.18096	0.68797	4.26336	6.1889
0.11095	0.63574	5.88188	8.14783
0.19801	0.57721	8.96233	11.1328
0.15669	0.52757	13.1553	14.7669
0.15079	0.50455	16.6597	18.2418
0.2173	0.51234	17.8183	20.6395
0.23269	0.54658	16.9667	20.948
0.33315	0.61222	14.9752	18.5448
0.50584	0.72571	12.6581	14.2494
0.80173	0.91979	10.3369	9.90884
1.38567	1.25119	8.172	6.64556
2.27484	1.78417	6.5113	4.5309
3.34093	2.56051	5.25875	3.36577
4.38807	3.52105	4.13187	2.7548
5.3491	4.48479	3.12249	2.29101
6.18343	5.25038	2.28799	1.83416
6.69501	5.68159	1.61538	1.45694
6.79318	5.72558	1.13536	1.28316
6.54772	5.39074	0.80342	1.27268
5.92894	4.72401	0.56543	1.28524
4.85033	3.81643	0.46901	1.2589
3.44834	2.7681	0.49171	1.20704
2.0803	1.74259	0.45462	1.16122
1.26617	1.51096	0.33057	1.13767
1.92075	2.46408	0.25092	1.1324
3.1624	3.58276	0.15086	1.13309
4.39498	4.46081	0.1911	1.13138
5.4816	5.05767	0.25214	1.12606
6.38971	5.45788	0.253	1.1224
7.07858	5.76113	0.22461	1.12814
7.52322	6.00947	0.09077	1.14662
7.66495	6.11281	0.08348	1.17301
7.51745	5.95136	0.06479	1.19855
7.2644	5.5544	0.21783	1.21929
7.0088	5.07272	0.17855	1.23866
6.67263	4.63465	0.11742	1.26141
6.16035	4.26152	0.19421	1.28715
5.57976	3.89269	0.27237	1.31062
4.93405	3.47838	0.15954	1.32676
4.09373	3.04615	0.18752	1.33293
3.2221	2.68503	0.16429	1.32851
2.56629	2.45733	0.0909	1.31513
2.26987	2.35906	0.19918	1.29665
2.17279	2.37765	0.19425	1.27789
2.1946	2.49417	0.18805	1.262
2.31108	2.65778	0.22948	1.24891
2.43162	2.81267	0.21697	1.2371
2.5436	2.92004	0.17238	1.22503
2.48813	2.95014	0.14366	1.21142
2.44989	2.89062	0.10502	1.19661
2.56491	2.79904	0.09407	1.18285
2.63862	2.86839	0.09409	1.1724
3.15849	3.48332	0.24599	1.16628
4.53183	4.96822	0.41058	1.16554
6.35291	7.12146	0.39191	1.17251
7.92918	9.22121	0.2481	1.18882
8.70365	10.3803	0.11805	1.21233
8.28058	10.079	0.22964	1.23874
7.00911	8.42707	0.21952	1.26607
5.51367	5.98534	0.14055	1.2948
4.11493	3.53251	0.12268	1.3249
2.96568	1.81422	0.22282	1.3548
2.11461	1.09176	0.38509	1.38374
1.5714	0.86981	0.56006	1.41906
1.2076	0.74682	0.78223	1.47967
0.80653	0.68723	1.08392	1.58359
0.60626	0.66139	1.38926	1.73279
0.56689	0.6303	1.75193	1.92117
0.51957	0.58218	2.1827	2.15372
0.45089	0.52557	2.79519	2.43298
0.36307	0.48245	3.41324	2.73418
0.42474	0.47377	3.7577	3.01838
0.40029	0.49785	3.99752	3.26482
0.39336	0.53151	4.24359	3.48323
0.38506	0.54877	4.49702	3.68925
0.29907	0.54232	4.79841	3.87442
0.16996	0.52661	4.8916	4.00487
0.22431	0.52526	4.67674	4.03495
0.31107	0.55318	4.4745	3.92681
0.33421	0.59528	4.11895	3.67468
0.21109	0.62178	3.49227	3.32459
0.22273	0.61852	2.7809	2.9809
0.16723	0.59623	1.99591	2.79025
0.09634	0.58187	1.4195	2.95285
0.13963	0.58796	1.74192	3.60406
0.2158	0.6012	2.63942	4.56294
0.2838	0.6086	3.54309	5.4573
0.2283	0.61223	4.32383	5.96879
0.07609	0.62333	5.21664	5.99433
0.10836	0.64794	6.48653	5.81166
0.09944	0.67818	8.19515	6.09454
0.15392	0.70013	10.0162	7.13131
0.13958	0.70817	11.3929	8.24039
0.13934	0.70948	11.9929	8.79461
0.34946	0.71489	11.9765	8.82472
0.32127	0.72792	11.827	8.68051
0.49551	0.74466	11.674	8.57976
0.63441	0.76185	11.3768	8.43202
0.44113	0.77997	10.7197	8.02607
0.31454	0.79793	9.54227	7.26165
0.18083	0.80954	7.78412	6.06926
0.22865	0.80666	5.55973	4.42809
0.19093	0.78628	3.46772	3.55181
0.11878	0.75477	3.87812	6.08561
0.09791	0.72276	7.95689	10.339
0.12211	0.6989	12.1815	14.4417
0.13922	0.68915	14.1277	17.3916
0.15457	0.69413	13.9916	18.3427
0.37722	0.70157	12.8754	16.7719
0.39993	0.69505	11.2644	13.3519
0.21497	0.68046	9.50737	9.65719
0.14616	0.67408	8.32334	6.82585
0.1321	0.68288	7.72345	5.28772
0.27492	0.7252	6.87714	4.74294
0.36788	0.82073	5.80923	4.329
0.54996	0.95644	4.62814	3.6466
0.84219	1.10403	3.42462	2.7445
1.23012	1.26407	2.51183	1.83264
1.73282	1.46519	1.71171	1.20851
2.18831	1.72097	0.98754	1.03305
2.55676	2.00663	0.75544	1.07977
2.90545	2.28658	0.82099	1.12891
3.24409	2.55059	0.84252	1.15377
3.50909	2.80267	0.68574	1.18215
3.78157	3.03482	0.47036	1.22506
4.02726	3.23342	0.33166	1.26563
4.19183	3.39348	0.31555	1.28403
4.32956	3.51299	0.2984	1.27931
4.36348	3.57352	0.2585	1.26172
4.21573	3.54009	0.18335	1.23923
3.87908	3.3869	0.19802	1.21338
3.32368	3.10147	0.23104	1.18124
2.65641	2.69358	0.18728	1.14127
2.02034	2.27034	0.16225	1.09703
1.50431	2.08182	0.29835	1.05597
1.33243	2.3028	0.41787	1.02529
1.76719	2.79492	0.41469	1.00827
2.83246	3.37726	0.29555	1.00474
4.26821	3.98187	0.15614	1.01272
5.84352	4.61557	0.16887	1.02769
7.2989	5.31921	0.19872	1.04425
8.5557	6.08091	0.18711	1.06096
9.67729	6.86565	0.19587	1.08112
10.5546	7.58988	0.19753	1.10815
10.9537	8.04168	0.09318	1.14128
10.8679	8.07242	0.07711	1.17697
10.4301	7.7123	0.23382	1.21352
9.70203	7.05676	0.2804	1.25027
8.88856	6.22324	0.11108	1.28404
8.0715	5.34668	0.18605	1.30979
7.13767	4.53252	0.12775	1.32301
6.07402	3.80186	0.23123	1.32096
5.02111	3.06513	0.188	1.30256
4.09982	2.26542	0.18996	1.26811
3.09585	2.03179	0.24767	1.2204
3.59321	3.72073	0.26037	1.16405
7.59586	7.06496	0.1387	1.10541
12.5045	11.5566	0.24174	1.05741
15.4678	16.1041	0.34696	1.03697
15.6131	19.0425	0.17044	1.04794
13.7428	19.2997	0.17343	1.0692
11.0857	16.8133	0.28823	1.07405
8.39145	12.2365	0.30204	1.06522
6.06482	7.00691	0.31892	1.06991
4.26076	2.99399	0.30507	1.10781
2.91918	1.64653	0.44472	1.18323
2.01553	1.80745	0.60673	1.28965
1.63199	1.70792	0.90985	1.41691
1.53058	1.43199	1.25146	1.56562
1.40089	1.21666	1.61212	1.75579
1.26651	1.08457	2.02178	2.00522
1.00464	0.95663	2.50662	2.29722
0.62816	0.81008	2.91676	2.58825
0.35039	0.7037	3.18482	2.84608
0.27373	0.70663	3.55714	3.0733
0.45193	0.78208	3.92569	3.28851
0.54203	0.83874	4.20987	3.49742
0.53965	0.8339	4.40367	3.69433
0.56155	0.78396	4.56709	3.87529
0.43591	0.73132	4.82097	4.03434
0.11801	0.70292	4.95526	4.14337
0.21937	0.68991	4.89455	4.15428
0.23943	0.67317	4.70664	4.03077
0.25071	0.65258	4.2624	3.75676
0.42499	0.6367	3.57085	3.3627
0.4399	0.62246	2.95629	3.04744
0.30184	0.59969	2.71294	3.17708
0.25267	0.5743	3.07484	3.77661
0.21782	0.5763	3.94164	4.39566
0.28374	0.62086	5.02503	4.72042
0.34206	0.68391	6.45793	4.92156
0.36686	0.7385	8.39585	5.62849
0.21239	0.78077	10.4794	7.08437
0.37589	0.82162	12.0658	8.62553
0.2962	0.86587	12.8857	9.66398
0.23997	0.90665	13.4355	10.1778
0.47098	0.936	14.0183	10.4017
0.60834	0.95343	14.2213	10.4862
0.42121	0.96439	13.8569	10.361
0.18897	0.97296	12.9412	9.8632
0.0892	0.97844	11.7186	8.9508
0.03117	0.97694	10.4274	7.69186
0.13807	0.96405	8.69619	6.10367
0.14546	0.93711	6.53281	4.20244
0.23006	0.89672	4.71863	4.03679
0.37767	0.84721	6.14101	8.69763
0.19696	0.79365	11.052	15.5137
0.21641	0.74115	16.2507	21.9459
0.37513	0.70609	19.4121	25.7045
0.5318	0.71764	19.9718	25.5986
0.63547	0.7777	18.6776	22.0559
0.54006	0.84726	16.4321	16.5045
0.45197	0.9181	13.7459	10.8064
0.62297	1.042	10.8238	6.67187
0.91301	1.26092	8.06912	4.48295
1.35758	1.57248	5.846	3.30563
1.93841	1.95763	4.10739	2.46705
2.44984	2.38399	2.80269	1.82901
2.95664	2.81199	1.99301	1.417
3.60084	3.21845	1.41171	1.28287
4.17385	3.57554	0.96508	1.32251
4.52956	3.82685	0.83616	1.3716
4.66735	3.92118	1.03331	1.37509
4.5999	3.83625	1.11493	1.35004
4.40609	3.57686	0.99526	1.3092
4.11047	3.19002	0.783	1.25186
3.5964	2.76538	0.4972	1.18594
2.89083	2.40285	0.3276	1.12331
2.22672	2.17172	0.40074	1.0747
1.78485	2.10178	0.50151	1.04578
1.43391	2.20017	0.5929	1.03287
1.11649	2.41412	0.47867	1.0307
1.66846	2.61305	0.40388	1.04001
2.84384	2.69552	0.90921	1.06623
4.12102	2.81317	0.69421	1.11146
5.48265	3.3779	0.29478	1.16755
6.76465	4.43944	0.26599	1.22123
7.79356	5.5684	0.2786	1.26657
8.53735	6.33295	0.42282	1.30642
8.97377	6.54353	0.24571	1.34296
9.16276	6.26893	0.15749	1.37221
8.99143	5.69351	0.31017	1.38713
8.33249	4.98967	0.38589	1.38559
7.44935	4.25091	0.25545	1.37429
6.60627	3.49414	0.1544	1.36293
5.73787	2.76764	0.16485	1.35501
4.81756	2.212	0.16587	1.34619
4.03883	1.93708	0.21452	1.33083
3.43763	1.87142	0.29284	1.30859
3.06709	1.86616	0.16313	1.28484
2.95982	1.8638	0.16753	1.26678
2.93252	1.89145	0.13567	1.25937
2.97417	1.97963	0.05756	1.26325
3.00088	2.07333	0.22582	1.27484
2.60042	2.02353	0.17865	1.28811
1.90302	1.82144	0.21093	1.29679
1.76067	2.43433	0.10634	1.29605
3.67022	4.85122	0.22546	1.28549
8.02864	8.66672	0.14723	1.27238
13.003	13.295	0.31392	1.26995
16.0965	17.4927	0.3353	1.28981
16.4855	19.6258	0.40088	1.3363
14.6547	18.9388	0.63028	1.40784
11.7766	15.8131	0.74969	1.49941
8.83592	11.118	1.11655	1.61852
6.13031	6.15475	1.76396	1.81426
3.98309	2.44711	2.46712	2.151
2.56399	1.03405	3.1189	2.62265
1.64788	1.07798	3.87318	3.14452
1.13915	1.00491	4.58692	3.63343
0.92737	0.89878	5.10771	4.06337
0.95896	0.83833	5.5111	4.43403
0.98648	0.76551	5.80674	4.72119
0.89894	0.66889	5.95875	4.88662
0.81811	0.58541	5.96269	4.8986
0.59258	0.54971	5.77994	4.7375
0.33906	0.55054	5.32909	4.40863
0.32871	0.55749	4.67749	3.95365
0.33919	0.56298	3.97965	3.44844
0.23178	0.57113	3.13207	2.98235
0.15425	0.58859	2.16302	2.69844
0.16586	0.61947	1.60868	2.8506
0.13851	0.65637	1.88088	3.50301
0.0925	0.68455	2.67869	4.36893
0.22397	0.69813	3.54449	5.15462
0.23407	0.70663	4.40043	5.7211
0.16421	0.72279	5.34959	6.03271
0.19157	0.74751	6.44062	6.14037
0.19048	0.77114	7.63977	6.22175
0.12572	0.78659	8.79785	6.44325
0.16414	0.79548	9.77486	6.8263
0.26879	0.80306	10.4841	7.27423
0.42219	0.81192	10.922	7.60973
0.37288	0.82107	11.0641	7.71231
0.25112	0.82933	10.9493	7.57197
0.1496	0.837	10.6305	7.20184
0.51321	0.84443	10.0224	6.62457
0.3933	0.85293	9.20341	5.91052
0.29981	0.86679	8.28269	5.19447
0.273	0.89162	7.29651	4.61138
0.25559	0.92921	6.27567	4.21579
0.24505	0.97357	5.40017	4.00631
0.28855	1.01167	4.97709	3.93999
0.24297	1.02968	4.69441	3.93394
0.33199	1.02225	4.32697	3.98314
0.26934	0.9956	3.93544	4.52774
0.11772	0.96002	4.43789	6.55618
0.334	0.92268	7.25026	10.2698
0.36241	0.88673	11.1747	14.6288
0.2044	0.85393	14.7739	18.2039
0.31129	0.8296	16.8717	19.9429
0.2854	0.8205	16.8302	19.3054
0.21794	0.82201	15.3071	16.2932
0.20346	0.82179	13.1007	11.9736
0.35031	0.84659	10.749	8.09056
0.59756	0.97839	8.56765	5.51994
0.92032	1.23382	6.623	3.86385
1.2022	1.51453	4.95581	2.56651
1.4689	1.72179	3.36894	1.51881
1.79645	1.8442	1.9598	0.9279
2.11758	1.95594	1.00681	0.92582
2.50877	2.13517	0.86458	1.12046
2.92188	2.39482	1.0064	1.2456
3.35882	2.70472	0.96237	1.26725
3.78397	3.04122	0.72989	1.24127
4.11802	3.37951	0.4849	1.2475
4.43401	3.67357	0.37664	1.31962
4.64825	3.8764	0.24941	1.40891
4.67019	3.95837	0.19523	1.45301
4.50837	3.90843	0.24907	1.44447
4.23342	3.73458	0.43595	1.4158
3.85316	3.46318	0.61065	1.39533
3.40007	3.13573	0.32527	1.38119
2.88236	2.79284	0.38646	1.35422
2.19752	2.49971	0.58825	1.30508
1.61903	2.42114	0.39104	1.24138
1.78919	2.67249	0.21685	1.18127
2.82273	3.06068	0.05963	1.13915
4.23267	3.34873	0.22556	1.11724
5.76101	3.71676	0.27986	1.11093
7.36476	4.58707	0.44098	1.11108
8.69351	5.7979	0.47142	1.11003
9.47825	6.79947	0.44651	1.10966
9.87205	7.24351	0.52535	1.11796
9.90509	7.10546	0.39078	1.14082
9.56814	6.61325	0.21215	1.17609
9.12884	6.04735	0.18169	1.21641
8.79822	5.56971	0.14107	1.25792
8.43584	5.22239	0.36322	1.30287
7.85573	4.99337	0.34147	1.35296
7.39014	4.86707	0.25113	1.40317
7.31359	4.83294	0.06715	1.44417
7.32655	4.85041	0.20979	1.46837
7.11435	4.82338	0.14668	1.47438
6.50646	4.62348	0.18879	1.46626
5.42901	4.13405	0.25719	1.448
4.14538	3.30298	0.304	1.42005
3.02678	2.4556	0.33012	1.37925
3.80124	3.60119	0.27284	1.32216
8.55948	7.82498	0.26906	1.25227
14.4332	14.087	0.1477	1.18338
18.697	20.9345	0.10467	1.13574
20.1107	26.1315	0.28437	1.13185
18.7344	27.3441	0.50911	1.19472
15.7835	23.6956	0.84538	1.33792
12.2592	16.7472	1.21136	1.54948
8.89106	9.40453	1.64466	1.79292
5.98218	3.9204	2.09301	2.02296
3.6822	1.37702	2.43078	2.20275
2.19752	1.31554	2.58625	2.30369
1.15123	1.10949	2.5849	2.31507
0.6381	0.68285	2.55733	2.27761
0.85352	0.49063	2.51781	2.26617
0.97818	0.56108	2.51117	2.33359
0.93935	0.6298	2.5699	2.49165
0.89906	0.65464	2.68862	2.71461
0.66349	0.66344	2.86671	2.95308
0.36262	0.66973	3.03189	3.16187
0.18507	0.67479	3.16226	3.31835
0.14552	0.67689	3.29441	3.41
0.11303	0.67223	3.30685	3.41901
0.19705	0.65649	3.15797	3.34218
0.39746	0.63128	2.95538	3.21757
0.28794	0.60555	2.63143	3.11049
0.42716	0.58844	2.11582	3.06674
0.814	0.582	1.67113	3.08981
0.58367	0.57892	1.65361	3.1771
0.29559	0.5714	1.48249	3.35333
0.54791	0.55993	1.09456	3.64421
0.38812	0.55024	1.20147	4.04031
0.21625	0.548	1.79008	4.51305
0.16808	0.55582	2.40341	5.03994
0.12872	0.57315	2.98423	5.55576
0.22061	0.59959	3.85352	5.92243
0.15362	0.63565	5.09008	6.02571
0.22012	0.67823	6.56515	5.90517
0.23072	0.71968	8.11422	5.87897
0.15089	0.75373	9.50253	6.32715
0.0825	0.77859	10.3724	7.05473
0.13336	0.79544	10.6961	7.54141
0.21948	0.80609	10.7839	7.54522
0.19721	0.81084	10.677	7.12698
0.21608	0.80849	10.2978	6.50959
0.35542	0.79778	9.72619	5.91141
0.34821	0.77993	9.09415	5.4291
0.25275	0.76091	8.50628	5.05896
0.16646	0.74696	7.9093	4.73438
0.15948	0.73628	7.12992	4.35631
0.12875	0.7192	6.24689	3.85069
0.17559	0.68741	4.91251	3.31494
0.14482	0.64247	3.39808	3.68353
0.13682	0.59533	5.09444	6.54542
0.25354	0.55924	9.42873	11.56
0.25477	0.54397	14.0684	17.2829
0.23379	0.55489	16.804	21.7661
0.31122	0.59127	16.885	23.1003
0.35421	0.64259	15.0716	20.6073
0.34008	0.69581	12.6687	15.5506
0.42013	0.75006	10.5205	10.2688
0.56523	0.83098	8.70367	6.64417
0.78233	0.98329	7.10935	5.02317
1.08894	1.21975	5.64738	4.15455
1.43168	1.49084	4.37142	3.16049
1.70208	1.72274	3.37882	2.12441
1.91856	1.8745	2.46329	1.40355
2.08482	1.94735	1.57337	1.17855
2.13105	1.95718	0.89754	1.2097
2.09375	1.92269	0.60696	1.24807
2.04182	1.86294	0.60735	1.24283
1.98757	1.79452	0.71013	1.21131
1.93385	1.73729	0.68944	1.1778
1.88663	1.71186	0.61803	1.15695
1.83775	1.72315	0.5204	1.1532
1.77159	1.75907	0.38348	1.16146
1.66463	1.80864	0.26497	1.17201
1.6235	1.86966	0.20343	1.17872
1.65827	1.9407	0.10248	1.18047
1.65427	2.01578	0.13497	1.17943
1.52439	2.08879	0.13166	1.17939
1.31112	2.1608	0.11957	1.18337
1.12025	2.23953	0.13512	1.19206
0.95937	2.33525	0.05516	1.20344
0.79408	2.46183	0.09935	1.21474
0.66629	2.63822	0.10978	1.22486
0.83766	2.88782	0.05244	1.23508
1.36728	3.2131	0.14311	1.24772
2.09047	3.55	0.24005	1.26392
3.06795	3.76334	0.22903	1.28261
4.29128	3.75861	0.1418	1.3011
5.72404	3.79035	0.11969	1.31662
7.35049	4.49226	0.17575	1.3261
8.92593	5.90032	0.17451	1.32716
10.0491	7.35664	0.04896	1.32143
10.6467	8.31484	0.17961	1.31419
10.9696	8.61121	0.27951	1.31066
11.0642	8.39524	0.19544	1.31399
10.7479	7.89527	0.07608	1.32441
10.0967	7.27136	0.20525	1.33952
9.28476	6.60897	0.31859	1.35662
8.25818	5.8814	0.36688	1.37341
7.0261	4.8381	0.3812	1.38579
5.4017	3.163	0.29902	1.38718
3.64235	2.86402	0.17901	1.37208
5.40849	7.28952	0.33221	1.34022
10.9022	13.1919	0.12288	1.30165
16.0328	18.5069	0.21423	1.28076
18.0538	21.7567	0.34965	1.30049
17.1155	21.9092	0.35548	1.35234
14.5875	18.6074	0.4501	1.40137
11.592	12.9806	0.59716	1.43498
8.65389	7.33802	0.94646	1.49138
6.1043	3.42985	1.34544	1.62175
4.15425	1.59451	1.58441	1.82489
2.53212	1.11091	1.82447	2.05391
1.45518	0.94524	2.16796	2.28101
1.09548	0.82891	2.53709	2.50731
1.08363	0.7556	3.0502	2.73046
0.99445	0.67776	3.5728	2.9401
0.80753	0.61229	3.8669	3.12754
0.90874	0.63154	3.92169	3.29213
0.78228	0.71239	3.93987	3.43644
0.65055	0.7706	4.0165	3.55332
0.45127	0.78127	4.0426	3.62315
0.30879	0.76585	3.99854	3.61635
0.3243	0.75215	3.80543	3.51105
0.26514	0.75164	3.37495	3.32257
0.16729	0.75644	2.92976	3.11017
0.15313	0.75135	2.56501	2.94809
0.30104	0.72649	2.04833	2.88296
0.30226	0.68761	1.45002	2.94064
0.15846	0.65183	1.14755	3.14393
0.20332	0.62996	1.35871	3.47595
0.12144	0.61863	1.89667	3.88424
0.18347	0.60966	2.5632	4.29709
0.10432	0.60204	3.3989	4.6234
0.12201	0.60309	4.45489	4.79484
0.14914	0.6197	5.73976	4.82746
0.18077	0.65115	7.13636	4.92107
0.15078	0.68993	8.3309	5.35004
0.16784	0.72728	9.15735	6.02869
0.25027	0.75832	9.68462	6.59861
0.21757	0.78405	10.0099	6.84368
0.16147	0.80873	10.0219	6.7729
0.31066	0.8364	9.72935	6.51697
0.42632	0.86941	9.38979	6.17634
0.42119	0.90761	8.98332	5.77333
0.37642	0.94797	8.36637	5.30227
0.34988	0.98295	7.59936	4.75336
0.28092	1.00249	6.86835	4.1513
0.30819	1.00304	5.97606	3.58106
0.33009	0.98965	4.90258	3.14086
0.19535	0.96862	4.26432	2.86777
0.20651	0.94243	3.91732	2.71647
0.24412	0.90888	3.33958	2.67747
0.16484	0.8645	2.53884	3.11604
0.11217	0.80924	3.31099	4.85653
0.08288	0.75237	8.1236	8.3397
0.14653	0.71715	13.5383	13.1858
0.181	0.72141	16.9507	17.8898
0.2069	0.74897	17.8486	20.435
0.27204	0.75856	16.4596	19.9188
0.23396	0.73274	13.7407	16.8628
0.48421	0.79415	10.9789	12.3109
1.18457	1.20788	8.54453	7.58594
2.25031	1.93457	6.407	4.08598
3.30709	2.74406	4.54463	2.32459
4.09492	3.49833	2.99308	1.52774
4.78958	4.13473	1.5559	0.97558
5.4666	4.5993	0.54719	0.74714
5.98028	4.87591	0.72034	0.9147
6.30307	4.99435	0.85785	1.11819
6.41595	4.98345	0.79959	1.21304
6.2925	4.84824	0.7599	1.21725
5.88217	4.58381	0.6975	1.19137
5.27308	4.20224	0.4065	1.17564
4.61205	3.71799	0.41299	1.1675
3.80393	3.13965	0.45098	1.14971
2.82378	2.57273	0.4458	1.11636
2.03298	2.30188	0.37443	1.07752
2.04789	2.47279	0.2968	1.04896
3.13241	2.81226	0.31991	1.03704
4.7871	3.24215	0.16027	1.03593
6.66826	4.11896	0.37934	1.03887
8.49186	5.56002	0.34103	1.0458
9.87782	7.10474	0.39894	1.05872
10.6676	8.13725	0.28635	1.07555
10.9353	8.38537	0.11242	1.09205
10.9012	8.07024	0.11965	1.10719
10.7557	7.58577	0.19794	1.12361
10.5003	7.13557	0.16894	1.14513
9.98474	6.68	0.17817	1.17471
8.92305	6.09444	0.28333	1.21144
7.68729	5.32733	0.16496	1.24911
6.84547	4.45251	0.12172	1.27937
6.04919	3.61608	0.14977	1.29588
5.01759	2.92312	0.16354	1.29699
4.04868	2.37706	0.20802	1.28593
3.22098	1.9719	0.30288	1.26815
2.45417	1.77888	0.33424	1.24844
1.98857	1.90959	0.10549	1.22811
2.18266	2.59965	0.21623	1.2033
3.40129	4.40559	0.02085	1.16792
6.27622	7.83149	0.10067	1.12163
10.9472	12.6791	0.23166	1.07551
15.4958	17.705	0.29335	1.04612
17.6794	21.0762	0.24783	1.04294
17.0328	21.4923	0.33902	1.06366
14.2836	18.7327	0.3656	1.09807
10.9999	13.5459	0.283	1.13577
8.13959	7.6211	0.32447	1.17632
5.60455	3.04573	0.62017	1.24213
3.57965	1.38279	1.04936	1.37985
2.14706	1.45042	1.45389	1.62709
1.3733	1.23132	1.91957	1.98289
1.22204	0.94604	2.58588	2.43866
1.14538	0.82231	3.48629	3.00908
1.01327	0.79402	4.44252	3.68233
0.81259	0.76682	5.4332	4.38038
0.58524	0.73155	6.29482	5.01113
0.45607	0.71445	6.9071	5.52721
0.46067	0.72142	7.42905	5.92076
0.33223	0.72918	7.75012	6.16339
0.1789	0.71889	7.65485	6.18349
0.25177	0.68897	7.12069	5.91993
0.20763	0.64949	6.26088	5.34917
0.26868	0.61097	5.25729	4.53738
0.40999	0.57562	4.24116	3.8438
0.39159	0.54105	3.48995	3.86154
0.24941	0.50884	2.97934	4.4852
0.24632	0.48867	2.40716	4.95683
0.24781	0.48908	2.30769	4.96965
0.23613	0.50923	3.63052	4.93332
0.19613	0.54293	5.254	5.35664
0.3207	0.57963	6.31635	6.03092
0.42256	0.6104	6.78211	6.38425
0.39767	0.63606	7.01254	6.27047
0.34729	0.66571	7.40746	6.11031
0.17712	0.70682	7.98403	6.28104
0.20966	0.75551	8.61795	6.69502
0.34511	0.80041	9.16897	7.13589
0.32761	0.83358	9.46224	7.46396
0.36885	0.85426	9.51764	7.60488
0.36533	0.86554	9.47522	7.53928
0.33581	0.87005	9.31272	7.28413
0.30571	0.8694	8.93177	6.89259
0.37376	0.86374	8.43867	6.43618
0.41234	0.85113	7.90199	5.96573
0.3468	0.82907	7.28498	5.47994
0.19282	0.7979	6.72595	4.92656
0.11511	0.7639	6.15847	4.26609
0.09559	0.73676	5.29128	3.53137
0.12169	0.72261	4.0793	2.81561
0.18792	0.72182	2.99013	2.22045
0.25305	0.73169	2.38866	1.874
0.26053	0.74773	1.69398	1.99457
0.32955	0.76389	1.41156	2.64236
0.31126	0.77433	2.21119	3.71289
0.19947	0.77415	3.73021	5.32078
0.1555	0.76095	6.05364	7.78694
0.04168	0.73982	9.22163	11.2219
0.17873	0.72194	12.5022	15.0934
0.23547	0.71773	14.4596	18.1612
0.2446	0.73462	14.3668	18.98
0.36506	0.77616	12.8314	16.9324
0.49308	0.83856	10.9555	12.8942
0.71263	0.91896	9.16763	8.67108
1.02282	1.05439	7.48907	5.76658
1.50376	1.31281	6.05859	4.36527
2.06099	1.69279	4.83959	3.4809
2.54737	2.10957	3.69397	2.52744
3.00939	2.48215	2.5243	1.63914
3.41336	2.79509	1.50402	1.14009
3.79811	3.07595	0.94285	1.09134
4.1555	3.33545	0.75913	1.18159
4.46394	3.55632	0.83109	1.24032
4.71128	3.71515	0.93855	1.25536
4.75374	3.79135	0.92788	1.24455
4.59116	3.76046	0.90505	1.22414
4.34909	3.60321	0.74186	1.20841
3.93378	3.33444	0.26649	1.20935
3.34383	2.99229	0.0988	1.22273
2.69852	2.62223	0.08351	1.2301
1.88055	2.32498	0.47936	1.21892
1.13424	2.24843	0.86165	1.19056
1.10594	2.44555	0.35752	1.15745
1.80664	2.8453	0.58187	1.1333
2.58074	3.37421	0.80023	1.12215
3.26337	3.95495	0.59804	1.11823
4.11541	4.48187	0.42751	1.11419
5.16175	4.88831	0.43885	1.10664
6.16522	5.17513	0.36504	1.09651
6.91089	5.40449	0.2966	1.08773
7.36866	5.6169	0.23735	1.08511
7.67496	5.72685	0.23314	1.09101
7.85662	5.67814	0.13452	1.10328
7.86899	5.53659	0.10343	1.11749
7.66425	5.34179	0.14678	1.1315
7.28632	5.05627	0.09674	1.14625
6.80577	4.63967	0.06181	1.16284
6.13694	4.10365	0.07424	1.18148
5.37715	3.48545	0.10554	1.2031
4.49503	2.81194	0.20846	1.2299
3.4132	2.16761	0.09061	1.26271
2.38357	1.75649	0.08717	1.29827
1.55874	1.73531	0.17001	1.32977
0.98052	1.96317	0.12978	1.34996
0.77636	2.2264	0.15647	1.3547
0.9383	2.42049	0.21149	1.34406
1.12958	2.48691	0.23476	1.32157
1.27908	2.40213	0.1964	1.29388
1.50415	2.20815	0.27925	1.26723
1.60501	2.03638	0.23157	1.24147
1.40683	2.11199	0.09754	1.21046
1.70568	2.72758	0.17025	1.17017
4.34322	4.17432	0.0569	1.12583
7.85786	6.52884	0.05519	1.08871
10.0785	9.39432	0.25913	1.06652
10.4926	11.6606	0.36462	1.06224
9.51186	12.0744	0.28666	1.07947
8.0596	10.4653	0.47366	1.11875
6.55125	7.81659	0.56592	1.17097
4.90687	5.20455	0.61585	1.23057
3.70968	3.30353	0.79868	1.30731
2.94203	2.30556	0.93231	1.41058
2.14739	1.76258	1.02435	1.53324
1.46288	1.28821	1.27466	1.66279
0.93646	0.87218	1.56064	1.8037
0.5014	0.62374	1.86125	1.97456
0.22858	0.61403	2.21834	2.18319
0.38963	0.7048	2.52467	2.41605
0.62985	0.75908	2.95546	2.65864
0.61411	0.7511	3.59215	2.91865
0.43938	0.71016	4.0054	3.20971
0.38417	0.67472	4.15277	3.52103
0.30624	0.65924	4.36978	3.81713
0.25651	0.64929	4.63581	4.05916
0.41284	0.62735	4.96903	4.22017
0.2858	0.59247	5.14039	4.27411
0.23811	0.55433	5.03472	4.19144
0.20411	0.52028	4.75941	3.96229
0.34063	0.49121	4.24135	3.59442
0.29558	0.46509	3.48683	3.12406
0.29197	0.44333	2.64971	2.72403
0.43272	0.43225	1.9502	2.73346
0.30295	0.43695	1.76804	3.27137
0.11402	0.4562	2.29531	4.08057
0.10261	0.48699	3.12086	4.93385
0.2144	0.52977	3.9487	5.68226
0.21858	0.58437	4.7643	6.16198
0.08037	0.64439	5.71134	6.30122
0.22955	0.70008	6.93313	6.26402
0.35512	0.74663	8.32275	6.42316
0.34795	0.78382	9.66776	6.98646
0.36372	0.81053	10.5856	7.64699
0.35438	0.82526	10.9344	7.98936
0.12592	0.82887	10.9262	7.90858
0.12441	0.8258	10.6444	7.54527
0.22776	0.82412	10.2124	7.10131
0.20785	0.83027	9.65066	6.63989
0.25679	0.84265	8.96261	6.0501
0.37188	0.85269	8.06806	5.25106
0.31374	0.8534	6.84213	4.30963
0.23732	0.84433	5.63721	3.39775
0.20238	0.8281	4.7218	2.69929
0.26097	0.80754	3.97173	2.39024
0.40017	0.7856	3.20873	2.71831
0.17078	0.76472	2.86217	3.8243
0.14341	0.74601	3.93183	5.66438
0.26185	0.73238	6.87182	8.24755
0.28564	0.73325	10.7405	11.4981
0.43224	0.75983	13.4478	14.7743
0.55594	0.81411	13.9493	16.9802
0.67158	0.89579	13.2421	17.3574
0.85302	1.02697	11.9296	15.7491
[truncated: 4,003 more rows]

## Sheet: Participant 4
Resultant linear accelerations
Left shoe		Right shoe
Motion capture system	Shoe-type IMU	Motion capture system	Shoe-type IMU
1.41078	0.7339	1.65737	3.76103
0.91386	0.75018	1.14088	2.29092
0.86187	0.82039	0.75486	1.2646
1.19612	0.99163	0.42806	0.78307
1.76896	1.27364	0.20393	0.69817
2.29733	1.61496	0.07236	0.81102
2.64866	1.93682	0.20736	0.96113
2.92012	2.19288	0.1513	1.07776
3.10165	2.3749	0.16562	1.14903
3.20625	2.48838	0.19256	1.18506
3.37537	2.55455	0.15905	1.19817
3.53208	2.61249	0.15191	1.19624
3.62939	2.70734	0.06385	1.18289
3.83297	2.87933	0.11451	1.16341
4.20019	3.14929	0.17674	1.14706
4.7659	3.51184	0.25988	1.14096
5.41271	3.96039	0.28368	1.14592
5.98223	4.50286	0.43192	1.15782
6.418	5.106	0.22083	1.17043
6.70381	5.65416	0.08663	1.17781
6.84052	5.99858	0.17299	1.17625
6.61753	6.00016	0.14323	1.16506
5.8761	5.55793	0.09619	1.14637
5.09417	4.70743	0.21838	1.12466
5.32816	3.82867	0.14251	1.10453
6.9531	3.72013	0.21162	1.08801
8.92287	4.60576	0.22002	1.07476
10.5074	5.9541	0.17698	1.0642
11.5519	7.3567	0.27098	1.05902
12.0816	8.39478	0.24469	1.06604
12.2265	8.80182	0.37744	1.09054
12.0789	8.61333	0.52222	1.13032
11.6657	8.00917	0.42126	1.17692
11.0913	7.22499	0.22325	1.22143
10.3786	6.48285	0.19186	1.25853
9.52451	5.87634	0.12417	1.28709
8.59066	5.35057	0.17664	1.30675
7.63518	4.79142	0.22551	1.31525
6.58385	4.14181	0.16249	1.31004
5.50925	3.44529	0.17153	1.28924
4.68721	2.78673	0.18611	1.25189
3.83972	2.20874	0.13949	1.20139
2.52449	1.74323	0.13315	1.14788
1.33289	1.6045	0.21164	1.106
1.20297	2.00613	0.11806	1.08936
1.4279	2.69326	0.13227	1.10268
1.87206	3.37783	0.21724	1.13796
2.7401	3.98456	0.15564	1.18013
3.35252	4.55867	0.11683	1.21668
4.03152	5.16298	0.13479	1.242
4.90232	5.84082	0.23801	1.2561
5.62123	6.58527	0.35215	1.26062
6.22641	7.33303	0.31719	1.25607
6.98035	8.04152	0.12463	1.24235
7.88621	8.76726	0.06075	1.21942
8.96994	9.62385	0.07428	1.18861
10.328	10.6703	0.09044	1.15563
11.8737	11.8323	0.08814	1.12937
13.0018	12.888	0.09785	1.11551
12.964	13.4988	0.15876	1.11446
11.9967	13.2297	0.12385	1.12432
10.3192	11.789	0.07246	1.1417
8.04478	9.44183	0.12012	1.16134
5.82209	6.83939	0.08002	1.17857
3.92285	4.43164	0.16848	1.18903
2.34114	2.44689	0.22843	1.18667
1.20042	1.10987	0.25238	1.16939
0.47267	0.50867	0.24445	1.14213
0.37853	0.40303	0.39117	1.11104
0.58183	0.39628	0.56793	1.08055
0.62397	0.40118	0.77463	1.05737
0.50746	0.42509	1.12043	1.06026
0.51597	0.45627	1.57612	1.13539
0.53485	0.48486	2.10576	1.35739
0.402	0.51781	2.6847	1.77158
0.45642	0.56608	3.32269	2.32652
0.35115	0.62599	3.98794	2.89617
0.17369	0.68563	4.59403	3.36549
0.10692	0.73881	4.97933	3.70937
0.10402	0.78493	5.20916	3.98268
0.12231	0.8215	5.51399	4.24437
0.2415	0.84086	5.87877	4.51608
0.30552	0.83699	6.20219	4.7987
0.17866	0.8097	6.4355	5.09388
0.15312	0.76475	6.52408	5.38209
0.33255	0.71547	6.42357	5.60032
0.32059	0.67541	6.14369	5.66633
0.39919	0.64836	5.72147	5.50893
0.50242	0.63153	5.22235	5.1146
0.44965	0.62345	4.71215	4.59993
0.30745	0.6256	4.21633	4.18405
0.09077	0.63774	3.87245	3.98834
0.13021	0.65563	4.43994	3.9091
0.20686	0.67436	6.37462	3.95355
0.19607	0.68965	8.9126	4.6284
0.32806	0.69577	11.38	6.3122
0.26604	0.68817	13.294	8.47468
0.41877	0.67127	14.4185	10.2412
0.22629	0.65794	14.7839	11.0996
0.07983	0.65907	14.5214	11.0326
0.19475	0.67717	13.8803	10.2739
0.20565	0.70785	12.9887	9.1601
0.232	0.74273	12.0127	8.00737
0.38475	0.77272	11.1259	6.9465
0.45809	0.79228	9.94156	5.95402
0.35223	0.79951	8.56294	4.99897
0.25549	0.79342	7.57044	4.08008
0.2052	0.7738	6.75273	3.16651
0.20849	0.74075	5.77668	2.17712
0.23348	0.69444	4.80812	1.10169
0.07705	0.63959	3.91807	0.58069
0.15359	0.58775	3.32825	1.48755
0.18095	0.55147	3.26948	2.47381
0.18458	0.53705	3.39585	3.42876
0.24265	0.54337	3.95646	4.43904
0.20125	0.5657	5.21466	5.53549
0.13371	0.59785	6.68264	6.73568
0.07404	0.63203	8.28082	8.18881
0.06517	0.66059	10.5319	10.2121
0.12258	0.67986	13.3115	13.0554
0.05893	0.69069	16.0645	16.5352
0.12061	0.69595	18.1628	19.8551
0.07741	0.69857	18.7785	21.8906
0.10724	0.69792	17.3623	21.8076
0.19946	0.6868	14.4285	19.3805
0.15558	0.65592	11.0955	15.0252
0.19447	0.60923	7.87662	9.91247
0.26638	0.57149	5.04475	5.52016
0.30788	0.55975	2.90218	2.63701
0.31048	0.56459	1.32677	1.15104
0.32069	0.57646	0.62911	0.58535
0.36999	0.60047	0.79769	0.49068
0.63273	0.65957	0.90527	0.66085
1.09988	0.80964	0.93352	0.87324
1.84748	1.12812	0.75719	1.01555
2.66548	1.63112	0.62526	1.07926
3.2029	2.22835	0.55401	1.09132
3.50892	2.76825	0.4269	1.08307
3.75415	3.11669	0.32277	1.07583
3.92795	3.23818	0.30241	1.07787
3.98213	3.21008	0.25499	1.08788
4.01463	3.15551	0.18514	1.10328
4.23737	3.17553	0.12899	1.12651
4.64229	3.32511	0.2104	1.16228
5.02881	3.61841	0.23393	1.20926
5.34817	4.03104	0.22829	1.25682
5.66674	4.50235	0.37656	1.292
5.99943	4.94773	0.40626	1.30652
6.18358	5.26518	0.17422	1.29791
6.09881	5.35374	0.0515	1.26816
5.65748	5.13615	0.25796	1.22235
4.94937	4.60635	0.27407	1.16848
4.96032	3.88457	0.33223	1.11524
6.10748	3.23205	0.22923	1.06895
7.78066	3.33865	0.1894	1.03585
9.42052	4.68582	0.38693	1.02231
10.5669	6.44062	0.7253	1.03023
11.2371	7.7834	0.78405	1.05779
11.5475	8.38503	0.55752	1.10277
11.4753	8.26884	0.38075	1.1602
11.2259	7.70219	0.25956	1.22046
10.8501	7.01897	0.33018	1.27273
10.226	6.4256	0.31636	1.30939
9.42006	5.93853	0.32686	1.32785
8.57426	5.47108	0.25627	1.32885
7.74049	4.96789	0.19007	1.31455
6.89951	4.45227	0.20814	1.29012
6.03266	3.96837	0.04669	1.26274
5.20598	3.50417	0.10513	1.23753
4.37448	2.98881	0.167	1.21771
3.39531	2.39638	0.20381	1.20629
2.28855	1.88781	0.28411	1.2048
1.3175	1.85293	0.26617	1.21256
0.84212	2.37623	0.17405	1.22754
1.11839	3.07534	0.18647	1.24587
1.88662	3.71487	0.24671	1.26242
2.57096	4.28206	0.16145	1.2737
3.34457	4.84865	0.22343	1.27863
4.35483	5.45133	0.23438	1.27631
5.26181	6.09395	0.213	1.26461
6.11468	6.84772	0.17199	1.24231
7.16479	7.91022	0.14014	1.21249
8.90428	9.50054	0.12616	1.181
11.4879	11.6351	0.12125	1.15221
13.9788	13.9551	0.07572	1.12991
15.5183	15.8244	0.19586	1.11983
15.4902	16.6144	0.16872	1.12741
13.6416	15.814	0.1397	1.15431
10.9976	13.252	0.19922	1.19628
8.42066	9.58341	0.13107	1.24041
6.01242	6.01152	0.1068	1.26837
3.76774	3.29851	0.22475	1.2705
1.98384	1.54391	0.45715	1.25333
0.8662	0.63447	0.56448	1.23012
0.46957	0.31563	0.6719	1.21146
0.54736	0.2652	0.89864	1.20938
0.63729	0.35658	1.17939	1.252
0.87153	0.45	1.62469	1.38478
0.89825	0.49867	2.11485	1.62572
0.69556	0.51771	2.48042	1.92473
0.58616	0.53481	2.78535	2.20598
0.4259	0.56816	3.1367	2.43576
0.16644	0.61961	3.38665	2.62576
0.08213	0.67897	3.60171	2.79662
0.09249	0.73311	3.85405	2.96662
0.12344	0.77288	4.09553	3.16253
0.13809	0.7959	4.36002	3.41798
0.14316	0.80388	4.72884	3.74704
0.13096	0.79788	5.1422	4.12664
0.11166	0.77879	5.53242	4.51201
0.13675	0.74853	5.90306	4.86723
0.15864	0.71083	6.16343	5.17912
0.16821	0.67439	6.31389	5.42963
0.23758	0.64902	6.3205	5.57845
0.28978	0.63621	6.10215	5.59149
0.21485	0.62897	5.75886	5.45002
0.17018	0.62071	5.27295	5.15557
0.11348	0.61191	4.60259	4.77447
0.1135	0.60834	4.03668	4.43177
0.04295	0.61434	4.50699	4.2011
0.17253	0.62916	6.66354	4.12108
0.1451	0.64804	9.61455	4.66723
0.14385	0.66309	12.359	6.4549
0.31009	0.66708	14.3391	9.01085
0.47249	0.66196	15.3914	11.33
0.46315	0.65914	15.7281	12.628
0.29067	0.6684	15.5653	12.6505
0.19205	0.68963	15.0343	11.7176
0.21072	0.71561	14.2979	10.3944
0.30287	0.73993	13.3479	9.11174
0.53354	0.76021	12.2519	8.01021
0.44149	0.77654	10.9471	6.98835
0.17876	0.78854	9.53484	5.88962
0.19916	0.79351	8.31882	4.665
0.29717	0.78789	6.94023	3.37863
0.30961	0.76866	5.54978	2.09434
0.16263	0.73395	4.59219	0.95864
0.03076	0.68631	4.02581	1.40595
0.18045	0.63458	3.93405	2.86774
0.20887	0.59139	4.22108	4.26159
0.21964	0.56827	4.91682	5.38946
0.24723	0.57071	5.88617	6.31463
0.20199	0.59663	6.93991	7.22349
0.15417	0.63741	8.04379	8.25093
0.17875	0.68043	9.21851	9.46998
0.18714	0.71383	10.9795	11.0268
0.12172	0.73158	13.6055	13.1578
0.14412	0.73344	16.1427	15.931
0.14684	0.72234	17.7888	18.9523
0.16967	0.7046	18.2088	21.312
0.19875	0.68906	17.0207	21.8956
0.17078	0.68176	14.3669	20.0484
0.2164	0.68273	11.2447	16.0627
0.38445	0.7027	8.18435	11.0096
0.60184	0.78618	5.42488	6.24524
1.17115	0.98378	3.42771	2.88146
1.9975	1.32237	1.96745	1.28035
2.71534	1.8001	0.94903	0.81396
3.29866	2.35925	0.72497	0.67816
3.77693	2.87729	0.87892	0.79797
4.06556	3.21703	0.89305	1.00096
4.11424	3.31405	0.80052	1.12766
3.97738	3.20955	0.75306	1.17095
3.75502	3.00935	0.6128	1.16943
3.69824	2.83341	0.39954	1.1497
3.84445	2.77116	0.28722	1.12217
4.01314	2.8599	0.3983	1.09188
4.29073	3.10453	0.27472	1.06584
4.74129	3.49012	0.12502	1.05193
5.2737	3.97166	0.21013	1.05319
5.75786	4.48879	0.33625	1.0665
6.06836	4.99287	0.19776	1.08597
6.22255	5.41585	0.00836	1.10473
6.10252	5.64926	0.10773	1.11705
5.54367	5.58574	0.17496	1.12275
4.78942	5.12552	0.08851	1.12652
4.50678	4.23798	0.1987	1.13063
5.52902	3.30592	0.13003	1.13067
7.48396	3.56341	0.0869	1.12081
9.5161	5.23392	0.30925	1.10304
11.148	7.03127	0.47675	1.08782
12.0883	8.28395	0.2261	1.08623
12.4841	8.87091	0.38112	1.1042
12.5191	8.81985	0.3817	1.14009
12.1506	8.30646	0.28122	1.18424
11.7381	7.65173	0.18542	1.22473
11.3564	7.07384	0.16236	1.25581
10.6756	6.58124	0.16186	1.27806
9.77249	6.08965	0.25463	1.29241
8.83696	5.5381	0.26096	1.29772
7.77313	4.90786	0.15602	1.29173
6.69127	4.18994	0.14881	1.27241
5.6672	3.37427	0.05199	1.24008
4.53624	2.49247	0.18274	1.19867
3.22176	1.74173	0.23229	1.15559
1.91413	1.62563	0.06498	1.11908
1.22295	2.22302	0.06047	1.09465
1.33365	3.01096	0.11767	1.08571
1.80957	3.78663	0.10606	1.09405
2.72548	4.53556	0.1563	1.11629
3.72423	5.2396	0.09295	1.14459
4.54584	5.8828	0.05734	1.17261
5.29869	6.52442	0.05708	1.19653
6.29895	7.32707	0.09886	1.2128
7.82189	8.48623	0.12415	1.21846
9.93761	10.1064	0.12479	1.21138
12.3995	12.1153	0.1242	1.18988
14.4089	14.2876	0.13134	1.15481
15.6737	16.2594	0.10165	1.113
16.0112	17.3932	0.14331	1.07838
14.8192	17.0018	0.16736	1.06579
12.2879	14.998	0.23621	1.07952
9.64454	11.8972	0.23812	1.10893
7.24673	8.33954	0.17848	1.13805
4.95349	5.14233	0.13997	1.15937
3.2956	3.10682	0.18165	1.17479
2.17785	2.07469	0.24258	1.18643
1.35109	1.33441	0.34156	1.19142
1.03252	0.71619	0.55731	1.18599
0.93216	0.39945	0.83211	1.18055
0.89245	0.43875	1.20177	1.21698
0.98709	0.50979	1.74899	1.35646
0.80669	0.53809	2.377	1.62513
0.54759	0.54621	3.01155	1.9997
0.61479	0.55527	3.74133	2.44642
0.50807	0.58393	4.36321	2.9087
0.18161	0.63371	4.56083	3.30343
0.15902	0.69344	4.65661	3.58892
0.22576	0.75546	4.90583	3.80181
0.25557	0.81503	5.2275	4.0178
0.34619	0.86417	5.52892	4.29392
0.28981	0.89492	5.88713	4.63541
0.30339	0.90029	6.24972	4.99499
0.36752	0.87519	6.41028	5.30152
0.27598	0.82226	6.31601	5.49608
0.25665	0.75173	6.07763	5.53496
0.13547	0.67708	5.74521	5.39452
0.0987	0.61016	5.28536	5.10066
0.14448	0.55821	4.78844	4.70245
0.05723	0.52845	4.41653	4.26152
0.07856	0.52849	4.34726	3.95389
0.06662	0.55649	5.29212	4.04233
0.08632	0.60108	7.36839	4.57941
0.0638	0.65102	9.91206	5.44891
0.21682	0.69689	12.2762	6.76487
0.37215	0.73042	13.9955	8.53034
0.34797	0.75002	14.8212	10.188
0.13346	0.76092	14.8267	11.1371
0.13404	0.76759	14.3753	11.1661
0.19963	0.76904	13.6256	10.3915
0.10413	0.76235	12.7542	9.15134
0.25261	0.74975	11.9316	7.85174
0.44881	0.73876	10.9388	6.74453
0.31806	0.73552	9.63643	5.83312
0.19182	0.74089	8.33654	4.9635
0.16379	0.75149	7.32146	4.0052
0.17604	0.76215	6.40612	2.96248
0.2851	0.76842	5.36811	1.93955
0.27548	0.76851	4.50998	1.06923
0.08504	0.76341	3.86069	0.90831
0.14946	0.75504	3.223	1.81364
0.08634	0.74409	3.14871	2.96362
0.18378	0.72939	3.71096	4.04704
0.20135	0.70994	4.67578	4.99227
0.17707	0.68806	5.80002	5.90093
0.18949	0.6686	6.88055	6.93766
0.1821	0.65545	8.10015	8.19799
0.17861	0.65063	9.97594	9.72921
0.15834	0.65551	12.3331	11.6377
0.09579	0.67074	14.408	14.0256
0.18875	0.69447	16.019	16.6878
0.15852	0.72034	16.9962	19.0175
0.18559	0.73972	16.866	20.2776
0.28271	0.74769	15.3367	19.8332
0.26113	0.74281	12.592	17.417
0.23297	0.72613	9.56159	13.4547
0.33972	0.71179	6.79043	8.94666
0.53506	0.73392	4.32521	4.98348
0.85341	0.8486	2.44475	2.31831
1.42962	1.10901	1.16164	1.05762
2.05775	1.49829	0.58404	0.63647
2.55065	1.91977	0.72574	0.54827
2.91949	2.259	0.8167	0.69564
3.06849	2.45358	0.94535	0.89347
3.04334	2.50372	0.90778	1.03872
3.04048	2.4448	0.68567	1.12899
3.01937	2.34027	0.51871	1.18528
2.95881	2.26403	0.34844	1.22049
2.95937	2.26243	0.17051	1.24021
2.98638	2.3435	0.09755	1.24794
3.08127	2.49526	0.14126	1.24638
3.32985	2.70604	0.22034	1.23708
3.79012	2.98365	0.09398	1.22167
4.45074	3.36019	0.58573	1.20208
5.17261	3.85459	0.71496	1.17982
5.83749	4.4325	0.4402	1.15738
6.35163	5.01643	0.20561	1.13841
6.70528	5.53304	0.28884	1.12473
6.94088	5.9461	0.60968	1.11488
6.93429	6.22762	0.60685	1.1063
6.60257	6.32309	0.3042	1.09809
5.86584	6.14218	0.12018	1.09149
4.96923	5.53012	0.04326	1.08833
5.28789	4.442	0.22284	1.08943
7.2718	3.6428	0.30845	1.09376
9.41648	4.78578	0.1733	1.0983
11	7.12562	0.31825	1.10065
11.992	8.9908	0.28568	1.1033
12.4941	9.71677	0.22543	1.11326
12.6489	9.46416	0.18002	1.13681
12.5726	8.72032	0.22205	1.17485
12.3106	7.92658	0.23294	1.22208
11.935	7.32012	0.31174	1.26912
11.3855	6.88807	0.2868	1.30671
10.5143	6.47685	0.18633	1.33023
9.46792	5.94579	0.21625	1.33931
8.52209	5.26065	0.1734	1.33493
7.5874	4.49459	0.12427	1.31952
6.58423	3.73789	0.08008	1.2962
5.50858	2.99653	0.08084	1.26692
4.39155	2.22564	0.16364	1.23425
3.26883	1.60785	0.12986	1.20334
2.22158	1.76194	0.15455	1.18038
1.9781	2.59527	0.15558	1.17008
2.45762	3.52469	0.16279	1.1738
3.09388	4.37864	0.15916	1.1891
3.89585	5.16606	0.17147	1.21115
4.74822	5.89578	0.09388	1.2344
5.49253	6.5829	0.11502	1.25406
6.27609	7.33049	0.15231	1.26699
7.25589	8.37728	0.15292	1.2704
8.81844	10.0077	0.22528	1.26105
11.6446	12.327	0.24179	1.23717
15.2901	15.067	0.09897	1.19972
17.7697	17.6327	0.04369	1.15439
17.8536	19.2513	0.08652	1.11561
16.0118	18.9828	0.29023	1.09928
13.0988	16.2228	0.42586	1.10329
9.80255	11.6692	0.44305	1.10534
6.61078	7.0279	0.34266	1.09095
4.0887	3.54472	0.3535	1.07391
2.41274	1.52256	0.46796	1.07702
1.11695	0.8337	0.53188	1.10098
0.42061	0.70934	0.58742	1.13034
0.59506	0.5914	0.72677	1.16711
0.92953	0.53945	1.16483	1.2546
0.98724	0.55401	1.82654	1.46754
0.8824	0.56633	2.49063	1.83441
0.81425	0.55747	3.09312	2.2963
0.60001	0.54292	3.6486	2.7786
0.40337	0.542	4.10467	3.20993
0.40539	0.56519	4.47109	3.51865
0.32013	0.60767	4.84304	3.69578
0.34367	0.65736	5.19918	3.81747
0.37175	0.70723	5.44658	3.97622
0.25038	0.75678	5.69678	4.21617
0.33207	0.80464	6.06748	4.5403
0.42552	0.84215	6.39528	4.93792
0.20453	0.85811	6.59932	5.36215
0.17457	0.84482	6.62341	5.71555
0.22876	0.80085	6.3866	5.89065
0.14153	0.73482	6.01006	5.80101
0.05986	0.66289	5.51339	5.41093
0.11652	0.60049	4.77633	4.79709
0.09159	0.55746	3.99949	4.16184
0.07707	0.53932	3.71198	3.71199
0.0635	0.55064	4.61961	3.49873
0.07489	0.59081	6.81313	3.67909
0.05248	0.64662	9.55195	4.75626
0.17282	0.69901	12.0852	6.76212
0.29799	0.73813	13.9018	9.02425
0.2145	0.76601	14.9069	10.7634
0.15111	0.78701	15.1166	11.5442
0.20164	0.80063	14.6811	11.36
0.11301	0.80194	13.9283	10.4426
0.17831	0.78688	12.9439	9.15662
0.30075	0.75697	11.7494	7.86541
0.35249	0.7193	10.5604	6.72526
0.28607	0.68395	9.57922	5.70194
0.19622	0.66029	8.66386	4.73835
0.1447	0.65241	7.41422	3.81009
0.12696	0.65796	6.11676	2.86749
0.11107	0.67061	4.97456	1.8162
0.1444	0.68349	3.9898	0.65627
0.14936	0.69218	3.50228	0.81529
0.02469	0.69647	3.29444	1.99715
0.1085	0.6994	3.2795	3.06305
0.19557	0.7026	3.69793	4.02278
0.15159	0.70312	4.64356	4.94734
0.08734	0.69573	5.75978	5.85259
0.1482	0.67879	6.67896	6.74048
0.18888	0.65806	7.45442	7.70439
0.14488	0.64289	8.71931	8.97125
0.1462	0.63857	10.9468	10.7743
0.13096	0.64482	13.3154	13.1081
0.14986	0.65952	15.0164	15.5779
0.15199	0.68069	16.0573	17.5581
0.16484	0.70632	16.1982	18.5304
0.1156	0.73281	15.1442	18.1692
0.16963	0.75229	12.9479	16.369
0.16254	0.75561	10.1267	13.4899
0.09097	0.73953	7.34251	10.1846
0.29607	0.71234	4.83341	6.91328
0.36916	0.69501	2.85824	4.03347
0.47065	0.71404	1.49788	1.96409
0.802	0.80173	0.65833	0.86862
1.22905	0.99379	0.64006	0.53201
1.82333	1.29348	0.70313	0.58735
2.4381	1.64968	0.77703	0.76366
2.84473	1.99573	0.75398	0.93601
3.15647	2.30032	0.63875	1.05916
3.3949	2.56031	0.60063	1.13448
3.60131	2.77231	0.43972	1.18045
3.88268	2.9413	0.2495	1.21148
4.24148	3.09451	0.14103	1.23165
4.49233	3.27201	0.21392	1.2412
4.66156	3.49996	0.27122	1.24104
4.98064	3.76843	0.27951	1.23145
5.38306	4.04121	0.25028	1.21199
5.74218	4.29137	0.35095	1.18384
6.02955	4.52944	0.37889	1.15275
6.24961	4.7823	0.19218	1.12703
6.43109	5.04503	0.13034	1.11139
6.54149	5.27702	0.17314	1.10537
6.46299	5.43311	0.26925	1.10622
6.22036	5.48747	0.2993	1.11087
5.79694	5.42907	0.47255	1.11722
5.10972	5.2196	0.4464	1.12605
4.70196	4.74798	0.2151	1.14059
6.11658	3.95252	0.55682	1.16172
9.00149	3.6814	0.41338	1.18299
11.7685	5.54555	0.23677	1.19356
13.7924	8.55773	0.30134	1.18828
14.9131	11.1818	0.41841	1.17331
15.2251	12.5437	0.43256	1.16064
15.0641	12.418	0.22626	1.15891
14.5907	11.218	0.09822	1.17078
13.835	9.62119	0.19616	1.19508
12.8535	8.1296	0.18926	1.22696
11.6832	6.92973	0.1696	1.2583
10.4606	5.98373	0.16458	1.28146
9.17697	5.13583	0.1274	1.292
7.75353	4.20329	0.09343	1.28875
6.33461	3.12147	0.09836	1.27294
4.95684	2.01265	0.07672	1.24746
3.71887	1.17279	0.24258	1.21651
2.74958	1.1557	0.19875	1.18416
2.03029	1.87627	0.19026	1.15308
2.02048	2.85094	0.27687	1.12723
2.67494	3.89009	0.14814	1.11298
3.61487	4.87163	0.27724	1.11499
4.79167	5.78538	0.31932	1.13415
6.0185	6.77942	0.16339	1.1679
7.33104	8.07423	0.15677	1.20849
9.30838	9.84691	0.15449	1.24356
12.5446	12.2146	0.07933	1.26177
16.45	15.2175	0.0725	1.25762
19.2983	18.5327	0.08508	1.23499
19.7565	21.0672	0.24479	1.20833
18.1253	21.4577	0.2186	1.19157
15.1381	19.3197	0.14951	1.18001
11.4517	15.3508	0.30425	1.15191
8.08032	10.4755	0.43258	1.09861
5.32856	5.73419	0.49081	1.04789
3.03172	2.28334	0.4946	1.0411
1.27654	0.88364	0.69444	1.09541
0.47858	0.84351	1.11565	1.21842
0.70832	0.69032	1.73439	1.45109
0.88547	0.52755	2.43705	1.85095
0.85479	0.54568	3.1017	2.40633
0.72863	0.63209	3.68727	2.99416
0.7639	0.68788	4.28443	3.45675
0.69165	0.7056	4.73088	3.72595
0.45936	0.70524	4.97891	3.84981
0.32595	0.70239	5.16031	3.92062
0.23261	0.70064	5.23103	4.01144
0.21162	0.699	5.28542	4.14884
0.2603	0.69898	5.40617	4.31286
0.26123	0.70614	5.40742	4.45974
0.29156	0.724	5.2415	4.54435
0.23863	0.74599	4.98382	4.53317
0.16579	0.75798	4.68335	4.41319
0.13922	0.75193	4.35086	4.20775
0.1511	0.73402	4.0093	3.98241
0.13214	0.71674	3.65076	3.7863
0.17799	0.70503	3.31982	3.59145
0.04628	0.69393	3.30571	3.33529
0.09895	0.67865	4.36233	3.05665
0.09622	0.66277	6.49272	3.04182
0.12057	0.65469	8.97674	3.7187
0.06431	0.6592	11.2253	5.27402
0.1898	0.67676	12.8534	7.37137
0.08798	0.70749	13.8472	9.30759
0.32958	0.75012	14.1657	10.5106
0.20697	0.79828	13.844	10.7739
0.21975	0.84092	13.2216	10.184
0.21344	0.86741	12.4229	9.03898
0.26127	0.87347	11.4605	7.7144
0.45419	0.86219	10.3698	6.47854
0.45935	0.83969	9.05985	5.39456
0.31699	0.81099	7.67821	4.35677
0.1102	0.77802	6.44532	3.24736
0.06516	0.74032	5.24677	2.06254
0.0578	0.6997	3.94803	0.89486
0.24744	0.66251	2.92468	0.43006
0.15726	0.6365	2.31403	1.52274
0.06945	0.62752	2.11612	2.75617
0.16454	0.63795	2.81892	3.99506
0.21263	0.66547	4.13786	5.10904
0.13694	0.70295	5.47017	6.04824
0.0695	0.73907	6.4284	6.91301
0.2044	0.76122	7.14589	7.88771
0.16718	0.76107	8.61598	9.15125
0.06525	0.73748	11.5081	10.8995
0.06655	0.69657	14.933	13.3262
0.11132	0.65232	17.4346	16.3014
0.19827	0.62199	18.0092	18.9513
0.26577	0.61433	16.4824	20.0334
0.31093	0.62178	13.6229	18.9546
0.44516	0.63246	10.3063	15.9436
0.47619	0.64889	7.2048	11.5931
0.41732	0.67282	4.67092	6.931
0.42209	0.69263	2.66574	3.23872
0.42835	0.70358	1.2573	1.19023
0.51556	0.71964	0.61635	0.52594
0.6807	0.76979	0.65454	0.48096
1.0571	0.89244	0.78147	0.70671
1.63762	1.12991	0.76116	0.9696
2.19914	1.47373	0.74494	1.13769
2.46838	1.83167	0.71301	1.20534
2.5157	2.09656	0.53103	1.20862
2.55871	2.21324	0.39615	1.18336
2.62502	2.20421	0.32236	1.15356
2.704	2.15939	0.15261	1.13275
2.76788	2.17309	0.10355	1.12798
2.95587	2.28412	0.03531	1.1421
3.35787	2.48999	0.14837	1.174
3.7585	2.78833	0.27188	1.21705
4.17005	3.17109	0.16972	1.25789
4.62591	3.60338	0.15733	1.28107
4.98701	4.02741	0.15488	1.27913
5.24002	4.37547	0.06293	1.25693
5.35886	4.60336	0.23258	1.22514
5.3373	4.69827	0.43579	1.19152
5.18751	4.64882	0.20939	1.1581
4.70238	4.42663	0.15771	1.12519
4.03022	3.95624	0.11751	1.09796
3.74465	3.14525	0.12132	1.08587
4.58014	2.16836	0.13934	1.09469
6.2908	2.23921	0.11207	1.124
8.17762	3.8039	0.19212	1.16999
9.84592	5.53466	0.11518	1.22445
10.8862	6.86719	0.0626	1.27537
11.3407	7.65778	0.08082	1.3137
11.43	7.85833	0.2343	1.33678
11.1891	7.54235	0.37668	1.34561
10.7101	6.92137	0.27	1.34103
9.99876	6.20033	0.21696	1.32349
9.14373	5.47391	0.12061	1.2962
8.25333	4.74049	0.22163	1.26474
7.2573	3.98161	0.3049	1.234
6.19658	3.23017	0.13752	1.20907
5.23511	2.57251	0.12327	1.19575
4.18903	2.08877	0.13523	1.19649
2.97241	1.82883	0.11604	1.20962
2.05982	1.866	0.19762	1.23234
1.602	2.20272	0.23837	1.26079
1.21192	2.68428	0.31413	1.28907
1.29295	3.15149	0.14952	1.31063
1.8438	3.53972	0.18374	1.32035
2.22212	3.84508	0.24708	1.31621
2.50668	4.07101	0.31175	1.30004
2.64927	4.23549	0.14821	1.27634
2.65825	4.38596	0.12187	1.25043
3.03174	4.58988	0.12469	1.22644
3.74025	4.91079	0.1037	1.20663
4.48011	5.37874	0.13669	1.19349
5.40109	6.00472	0.1454	1.19013
6.44828	6.86759	0.25826	1.19678
7.75094	8.16571	0.06924	1.20963
9.70727	10.0801	0.13067	1.22291
11.812	12.4826	0.0722	1.23003
13.3554	14.7336	0.11228	1.22709
13.587	15.8939	0.1131	1.21805
12.2968	15.3094	0.15532	1.21091
10.1366	12.9659	0.08737	1.20626
7.71734	9.42863	0.1075	1.19381
5.44477	5.71422	0.21529	1.16463
3.49374	2.90656	0.24626	1.12554
1.89484	1.44391	0.31076	1.09395
0.76632	0.84215	0.44627	1.08309
0.40761	0.49275	0.71376	1.10097
0.50375	0.3101	0.91157	1.15294
0.78725	0.37345	1.0251	1.23929
0.89693	0.4989	1.24823	1.35867
0.69712	0.58826	1.53149	1.51337
0.57596	0.63602	1.72669	1.69602
0.52383	0.65574	1.91064	1.88402
0.31331	0.66295	2.2391	2.06096
0.18632	0.66631	2.64406	2.22061
0.2337	0.66844	2.99433	2.35771
0.13742	0.66944	3.2571	2.47964
0.13064	0.67075	3.44667	2.61769
0.14025	0.67636	3.63896	2.81297
0.14201	0.68888	3.85363	3.0855
0.21388	0.70627	4.1257	3.4158
0.19016	0.72346	4.4788	3.75461
0.17647	0.7368	4.78554	4.05505
0.05185	0.74517	4.98526	4.30081
0.1123	0.74769	5.07597	4.49119
0.07346	0.74203	5.00242	4.61403
0.18427	0.72606	4.89065	4.65418
0.29022	0.7013	4.80838	4.6076
0.17798	0.67218	4.6288	4.49056
0.17811	0.64237	4.28834	4.34833
0.28575	0.61551	3.93409	4.21412
0.31981	0.59681	3.71025	4.02687
0.34245	0.59183	4.0416	3.62421
0.19545	0.60551	5.62237	3.01402
0.08974	0.63996	8.00107	3.07573
0.10676	0.69	10.369	4.7608
0.23775	0.74395	12.3064	7.1192
0.26375	0.7909	13.5	9.06814
0.24324	0.82526	13.9117	10.1233
0.21612	0.84602	13.869	10.2904
0.16974	0.85323	13.521	9.79258
0.17257	0.846	12.8853	8.93954
0.19142	0.82441	12.1462	8.02041
0.22326	0.78948	11.3463	7.15688
0.22443	0.74217	10.4101	6.33045
0.30716	0.68732	9.29456	5.51177
0.25088	0.63572	8.05848	4.69608
0.15861	0.59993	6.77589	3.85037
0.11982	0.58895	5.81301	2.90995
0.12192	0.60332	5.20003	1.93352
0.1886	0.63308	4.41637	1.38462
0.17911	0.6642	3.85832	1.80409
0.03998	0.68839	3.81952	2.61
0.15818	0.70532	3.82996	3.43899
0.21013	0.71783	4.36887	4.27749
0.21738	0.72721	5.23867	5.11703
0.13412	0.73213	5.91318	5.94302
0.13257	0.73085	6.55242	6.83045
0.12688	0.72285	7.51414	7.95448
0.09331	0.70944	9.32799	9.4553
0.12947	0.69473	11.6103	11.2836
0.13546	0.68443	13.4558	13.1909
0.06101	0.68215	14.6636	14.9027
0.09033	0.68807	15.451	16.3083
0.11966	0.70037	15.8123	17.3871
0.17775	0.71613	15.6596	18.0142
0.26187	0.7312	14.9352	17.9345
0.25135	0.74004	13.2336	16.8133
0.3343	0.74156	10.722	14.4382
0.56205	0.76422	8.03554	11.0524
0.96907	0.87884	5.56497	7.33349
1.6364	1.13125	3.4257	4.06279
2.28764	1.49007	1.70967	1.83891
2.82194	1.90127	0.71254	0.85038
3.30369	2.33356	0.68701	0.68068
3.64001	2.7496	0.77013	0.73085
3.97069	3.08755	0.79022	0.88073
4.34816	3.30848	0.7401	1.04395
4.50882	3.42276	0.54614	1.15063
4.42979	3.46381	0.39964	1.20544
4.42662	3.4628	0.48863	1.23813
4.54968	3.44843	0.62115	1.26118
4.61366	3.45322	0.87299	1.27198
4.69135	3.50059	0.90087	1.26739
4.8582	3.60654	0.75472	1.24966
5.05904	3.78956	0.43752	1.2252
5.23639	4.04265	0.25952	1.20115
5.46079	4.3248	0.26856	1.18046
5.72374	4.60089	0.22039	1.16096
5.86646	4.87073	0.22521	1.1407
5.8107	5.14533	0.23503	1.12188
5.66171	5.40244	0.34106	1.11019
5.40323	5.54886	0.27231	1.11173
4.85965	5.38239	0.26054	1.12867
4.73381	4.67165	0.28091	1.15651
6.59905	3.65351	0.32431	1.18637
9.55303	4.22774	0.2078	1.21017
12.2145	7.00476	0.21648	1.22332
13.9557	9.8773	0.27801	1.22535
14.8209	11.6704	0.34547	1.21932
15.1275	12.1175	0.37611	1.20923
15.0104	11.4364	0.20371	1.19767
14.6287	10.1406	0.1509	1.18592
13.9714	8.79753	0.28068	1.1762
12.9971	7.71005	0.16272	1.17391
11.8019	6.82978	0.24925	1.18419
10.4514	5.94255	0.19139	1.20531
9.07974	4.91051	0.1167	1.22989
7.78362	3.76492	0.08829	1.25254
6.36497	2.63328	0.18797	1.27221
4.83108	1.60696	0.10525	1.28811
3.62974	0.84759	0.14082	1.29686
2.95847	1.30837	0.17994	1.29291
2.51281	2.47942	0.24956	1.27252
2.63552	3.66113	0.17922	1.23803
3.47358	4.68609	0.11855	1.19813
4.35913	5.57169	0.18881	1.16485
5.15773	6.39738	0.02108	1.14906
6.06378	7.20042	0.08926	1.15559
7.19787	8.02357	0.05907	1.181
8.36936	9.04126	0.03672	1.2159
9.97231	10.5911	0.05183	1.24854
12.5727	12.9809	0.08786	1.26899
15.7778	16.1195	0.09215	1.274
18.3923	19.2521	0.12613	1.26807
19.0668	21.2149	0.17152	1.259
17.7232	21.1086	0.17942	1.25136
15.0682	18.6597	0.19579	1.24196
11.6037	14.2631	0.29674	1.22166
8.21002	9.11246	0.31314	1.18415
5.42115	4.75829	0.23556	1.13667
3.08762	2.08286	0.43329	1.10353
1.43785	1.0355	0.74035	1.11922
0.6287	0.8065	1.19109	1.2369
0.6207	0.65085	1.81373	1.52596
0.92628	0.57221	2.5083	1.99263
1.04644	0.61713	3.11876	2.53147
0.85888	0.68648	3.75118	3.00273
0.53912	0.72571	4.33096	3.3384
0.32236	0.73718	4.60145	3.55226
0.42488	0.73694	4.71299	3.68678
0.34977	0.73353	4.9054	3.79113
0.22682	0.72806	5.20362	3.91278
0.32667	0.7203	5.45763	4.07852
0.22007	0.71273	5.58989	4.28684
0.09438	0.70927	5.74513	4.52323
0.13469	0.71169	5.91066	4.77344
0.24689	0.71861	5.95198	5.0052
0.37904	0.72559	5.85482	5.15912
0.2771	0.72765	5.58606	5.17655
0.40009	0.72233	5.14326	5.01453
0.31367	0.71084	4.65896	4.67165
0.15822	0.69803	4.24926	4.25191
0.1817	0.6893	4.22176	3.9471
0.14518	0.68633	5.30129	3.87803
0.13472	0.68691	7.39259	4.07503
0.18649	0.68853	9.78272	4.83468
0.14205	0.69081	11.9557	6.45542
0.16843	0.69576	13.5722	8.50984
0.30143	0.70747	14.3665	10.2438
0.16784	0.73052	14.3647	11.1078
0.28063	0.76681	13.8189	10.9442
0.23598	0.81206	13.0294	9.98952
0.0639	0.85674	12.1575	8.66885
0.14374	0.89158	11.1239	7.35125
0.23066	0.91086	9.88589	6.19792
0.35953	0.91224	8.55317	5.14205
0.50646	0.89582	7.16882	4.04477
0.4147	0.86385	5.55915	2.8721
0.26464	0.82186	4.1057	1.72886
0.15035	0.77645	3.51241	0.84813
0.09413	0.73122	3.18294	0.97159
0.10061	0.68949	2.60888	1.84074
0.12047	0.65779	2.49372	2.78874
0.13573	0.64312	2.7925	3.66232
0.18461	0.64921	3.30268	4.42823
0.18901	0.67478	4.0657	5.12429
0.20415	0.71214	4.87783	5.77958
0.13636	0.75006	5.40101	6.35728
0.09324	0.78049	5.67152	6.80838
0.12369	0.80087	6.06112	7.15415
0.07362	0.81076	6.69493	7.52203
0.03955	0.80814	7.74592	8.10738
0.0691	0.79102	9.38913	9.07105
0.12217	0.76312	11.2136	10.4575
0.13757	0.73328	12.5788	12.1938
0.12346	0.70986	13.3849	14.046
0.11424	0.70032	13.4268	15.4607
0.09444	0.70923	12.4852	15.7461
0.16804	0.72758	10.6763	14.6167
0.26125	0.73607	8.28413	12.2634
0.29389	0.73622	5.96117	9.06784
0.39938	0.75919	4.15362	5.68067
0.51741	0.81964	2.56617	2.93951
0.72073	0.90501	1.3476	1.31423
1.08481	1.01721	0.75362	0.6636
1.46004	1.17652	0.63411	0.53136
1.75959	1.38831	0.76819	0.65637
2.01344	1.62281	0.70261	0.84671
2.31253	1.83053	0.66034	0.9732
2.55406	1.97527	0.70173	1.02383
2.72336	2.06198	0.56558	1.03394
2.89108	2.13342	0.41769	1.03845
3.02265	2.2318	0.28812	1.05633
3.13271	2.37091	0.13363	1.08912
3.25868	2.55396	0.28539	1.12839
3.67008	2.80221	0.23318	1.16681
4.27272	3.14122	0.05909	1.20077
4.80201	3.56378	0.22547	1.22667
5.33368	4.02521	0.19959	1.24033
5.89229	4.48239	0.21655	1.238
6.3397	4.92435	0.24486	1.21844
6.65658	5.33644	0.11274	1.18526
6.82702	5.66131	0.36847	1.14538
6.68156	5.81884	0.18095	1.10541
6.22385	5.72712	0.33715	1.0698
5.57109	5.33734	0.29341	1.04213
4.83376	4.72636	0.10913	1.02892
4.74614	4.1727	0.31637	1.03765
6.15325	4.03386	0.43546	1.06745
8.32971	4.43361	0.42002	1.10844
10.2859	5.47582	0.45782	1.15205
11.7305	7.08863	0.34458	1.19457
12.5167	8.57854	0.21933	1.23263
12.77	9.2993	0.21015	1.26145
12.9597	9.15033	0.16939	1.27635
12.8689	8.45551	0.16637	1.27568
12.2682	7.63915	0.15299	1.26233
11.4904	6.92277	0.07125	1.24238
10.6912	6.29154	0.21104	1.22339
9.83384	5.66339	0.27718	1.21232
8.79553	4.99639	0.09992	1.21245
7.55131	4.26557	0.11955	1.22218
6.28436	3.43089	0.08626	1.23666
5.09025	2.5143	0.17921	1.25011
3.99578	1.69219	0.11161	1.25803
3.01978	1.34181	0.27579	1.25918
1.94175	1.68467	0.35581	1.25571
1.27618	2.41436	0.23986	1.25
1.72678	3.32169	0.3708	1.24096
2.52558	4.2702	0.16141	1.22391
3.52254	5.14134	0.10441	1.19602
4.5006	5.91136	0.19935	1.16245
5.17751	6.66855	0.08829	1.13454
6.07592	7.51838	0.30302	1.1217
7.31784	8.48347	0.24394	1.12723
8.57294	9.5408	0.09775	1.1488
10.0471	10.7422	0.16931	1.17866
12.051	12.2449	0.10989	1.20626
14.2358	14.118	0.22113	1.2238
15.669	16.0658	0.24036	1.22854
15.4497	17.3566	0.18212	1.22213
13.6532	17.0942	0.33601	1.2093
11.0502	14.8407	0.45854	1.19388
8.3616	11.1089	0.36164	1.1745
6.22494	7.09624	0.22351	1.14537
4.40242	3.98884	0.24886	1.10522
2.65497	2.39321	0.36999	1.06485
1.53876	1.72163	0.46343	1.04128
0.97547	1.13247	0.64745	1.05072
0.88292	0.61161	0.93611	1.11039
0.94374	0.40255	1.39277	1.24108
0.84673	0.46962	1.92833	1.45592
0.79522	0.56403	2.43764	1.75109
0.65092	0.62787	2.9343	2.11352
0.54536	0.66751	3.41936	2.50333
0.44186	0.69637	3.83729	2.85327
0.2434	0.72251	4.16296	3.12552
0.18809	0.74763	4.42707	3.34121
0.21769	0.77066	4.64044	3.54774
0.08613	0.7865	4.8227	3.77632
0.18554	0.7901	5.03695	4.02654
0.27641	0.78253	5.24699	4.27551
0.37454	0.7703	5.38797	4.49748
0.37002	0.7615	5.44596	4.67531
0.30986	0.75908	5.44582	4.78648
0.30018	0.75794	5.25045	4.7987
0.23793	0.75002	4.79101	4.69651
0.2896	0.73052	4.31077	4.48841
0.48832	0.70088	3.99745	4.21786
0.39673	0.66751	3.88658	4.00118
0.27398	0.63892	3.96665	3.95318
0.10328	0.62253	4.77539	4.02493
0.1245	0.6205	6.57759	4.10456
0.18724	0.62866	8.78318	4.45197
0.26917	0.64102	10.7814	5.58674
0.25604	0.65667	12.2735	7.32021
0.16938	0.68171	13.1215	8.92647
0.1902	0.72282	13.2795	9.83459
0.10147	0.77873	12.9222	9.86249
0.17348	0.83896	12.3856	9.19669
0.10905	0.89041	11.8164	8.18661
0.24352	0.92346	11.0933	7.14199
0.16117	0.93451	10.085	6.21863
0.24773	0.92454	8.94763	5.38925
0.45937	0.89656	7.84246	4.54858
0.4642	0.85534	6.56264	3.65195
0.27379	0.80529	5.24797	2.74394
0.11469	0.74868	4.49381	1.88649
0.11612	0.69046	4.06308	1.19133
0.19422	0.64085	3.30484	1.2087
0.16	0.60976	2.70241	2.0009
0.09091	0.60227	2.71946	2.91093
0.25894	0.61794	2.99312	3.70488
0.23072	0.65062	3.46457	4.37678
0.21172	0.69034	4.00661	4.9825
0.18092	0.72783	4.52559	5.53555
0.12295	0.7576	5.04539	6.02683
0.11875	0.77775	5.81217	6.50167
0.13608	0.78671	6.71663	7.08831
0.09586	0.78239	7.88291	7.93163
0.2179	0.76557	9.4315	9.08401
0.26031	0.74013	10.7762	10.4688
0.21181	0.7105	11.7756	11.9638
0.20276	0.68261	12.8918	13.4578
0.12742	0.66352	13.8336	14.7245
0.0351	0.65614	13.6876	15.3881
0.0461	0.65642	12.3001	15.1338
0.13498	0.65662	10.298	13.7962
0.17532	0.65128	8.10588	11.3907
0.1895	0.64507	5.92194	8.31601
0.22228	0.65092	4.00507	5.28173
0.21533	0.6678	2.4269	2.89147
0.26446	0.68285	1.24046	1.39844
0.32565	0.69692	0.63567	0.71226
0.53033	0.72433	0.60587	0.56105
0.83077	0.78176	0.72452	0.66774
1.22873	0.88924	0.69191	0.8323
1.58078	1.06643	0.56984	0.9627
1.84641	1.30824	0.55418	1.03858
2.09138	1.57379	0.47787	1.08057
2.28848	1.81349	0.25131	1.11639
2.49817	2.003	0.1937	1.15738
2.74923	2.1574	0.28715	1.19987
3.01365	2.3117	0.29754	1.23841
3.27095	2.48464	0.20753	1.27044
3.54283	2.67275	0.16547	1.29266
3.84718	2.88795	0.16527	1.29998
4.30238	3.18465	0.07495	1.28704
4.95203	3.62358	0.12057	1.25179
5.69976	4.22284	0.3169	1.19998
6.46389	4.93951	0.28294	1.14341
7.11654	5.67626	0.09619	1.09367
7.5964	6.31017	0.09354	1.05803
7.91858	6.72523	0.15987	1.038
7.96634	6.84905	0.20567	1.03109
7.59195	6.66736	0.14908	1.03382
6.86784	6.21499	0.10665	1.04337
6.0899	5.53501	0.10683	1.05887
6.21613	4.67146	0.24296	1.08163
7.93801	4.30221	0.40733	1.11216
10.4535	5.80621	0.23445	1.14683
12.8399	8.52733	0.30025	1.17792
14.3842	10.9997	0.45667	1.19798
15.11	12.3696	0.357	1.2056
15.3726	12.4227	0.30438	1.20619
15.282	11.5316	0.22493	1.2063
14.8891	10.3029	0.14172	1.20866
14.1213	9.17253	0.1756	1.21314
13.0752	8.2415	0.157	1.22028
11.9203	7.37225	0.12483	1.23233
10.6602	6.41015	0.20416	1.25043
9.20784	5.32015	0.16044	1.27132
7.58638	4.17772	0.11013	1.28836
5.96731	3.04544	0.21098	1.296
4.52052	1.88945	0.30426	1.29159
3.44417	0.90276	0.26778	1.27496
2.33896	1.45303	0.13121	1.24888
1.70397	2.74033	0.21022	1.21767
2.9467	3.96726	0.22164	1.18484
4.43375	5.09001	0.14533	1.15515
5.59508	6.19043	0.16223	1.13555
6.68716	7.34008	0.07152	1.13129
7.86355	8.66312	0.194	1.14341
10.15	10.4389	0.37105	1.16849
13.7228	13.0102	0.21037	1.19781
17.0694	16.4325	0.09889	1.22137
19.2472	20.1582	0.30938	1.23627
19.9197	23.0267	0.37021	1.24787
18.7739	23.6741	0.35846	1.26137
16.0936	21.3758	0.42554	1.27344
12.5056	16.638	0.33792	1.27337
9.0415	10.8689	0.16547	1.25303
6.1201	5.62864	0.17809	1.21305
3.53226	2.0619	0.48808	1.17247
1.67087	0.70445	0.98223	1.19021
0.64922	0.7125	1.51616	1.34303
0.60828	0.57057	1.95668	1.63458
0.86788	0.48633	2.39865	1.99343
0.87757	0.55933	2.91062	2.35699
1.0256	0.62711	3.36384	2.67707
1.1092	0.64984	3.69491	2.90421
0.78223	0.65889	3.91979	3.0279
0.43169	0.67456	3.99815	3.09321
0.41079	0.69115	4.00228	3.15649
0.34375	0.69974	4.0109	3.24467
0.15912	0.70358	4.08756	3.36169
0.09794	0.71004	4.2497	3.51508
0.10473	0.72045	4.53408	3.71656
0.18752	0.73077	4.91265	3.96476
0.24401	0.73748	5.19954	4.24228
0.23249	0.73981	5.38144	4.52908
0.27814	0.73763	5.54364	4.80496
0.57253	0.73159	5.47927	5.02338
0.58088	0.72334	5.23939	5.11679
0.17115	0.71283	4.94486	5.04458
0.35913	0.69794	4.43384	4.7803
0.24188	0.67821	3.74118	4.28863
0.26432	0.65801	3.54462	3.62172
0.41079	0.64358	5.0224	3.12815
0.2327	0.63698	7.76872	3.46976
0.24827	0.6353	10.5955	4.79501
0.15006	0.63544	12.8567	6.76083
0.10769	0.63977	14.3044	8.90857
0.18184	0.65571	14.879	10.576
0.29753	0.6886	14.7958	11.3128
0.26123	0.73535	14.3178	11.1019
0.15258	0.78529	13.5835	10.1672
0.13844	0.82662	12.6557	8.84349
0.23218	0.85159	11.5066	7.48148
0.39956	0.85878	10.2262	6.28482
0.30066	0.85218	8.89404	5.23134
0.30928	0.83754	7.41904	4.16182
0.3616	0.81887	6.10477	2.98264
0.21689	0.79633	5.22606	1.79829
0.24076	0.76762	4.35603	0.98873
0.18977	0.73312	3.40253	1.20495
0.14659	0.69888	2.908	1.93838
0.1063	0.67451	2.84651	2.76823
0.10288	0.66807	3.11745	3.62749
0.164	0.68031	3.98266	4.4533
0.23051	0.70264	4.99056	5.20685
0.11588	0.72358	5.83777	5.91866
0.11884	0.73799	6.56972	6.64828
0.13346	0.74736	7.23817	7.45079
0.10625	0.75233	8.286	8.45045
0.05065	0.74805	10.2622	9.90773
0.08362	0.72946	12.8774	12.0989
0.21198	0.70079	15.3556	14.9934
0.27832	0.67534	16.901	18.0373
0.25831	0.66512	16.9216	20.2362
0.27219	0.67358	15.4739	20.5069
0.22232	0.69391	12.9212	18.3227
0.1842	0.71335	9.95943	14.1905
0.40122	0.72822	7.19425	9.35819
0.58164	0.76723	4.76003	5.11289
0.91094	0.8883	2.77649	2.2849
1.43719	1.11869	1.38798	0.99962
2.10426	1.43225	0.67298	0.66241
2.70823	1.79593	0.66542	0.67575
3.13233	2.19172	0.98433	0.85742
3.49533	2.57849	0.96402	1.0198
3.83614	2.87921	0.77467	1.08811
3.99092	3.04193	0.70881	1.08624
3.91955	3.07798	0.67505	1.06239
3.88053	3.04541	0.55298	1.04536
3.93674	3.019	0.35544	1.04282
3.9761	3.04393	0.40457	1.055
4.03495	3.11531	0.14445	1.08029
4.16066	3.22049	0.1904	1.11463
4.35341	3.37998	0.15107	1.1521
4.60364	3.62709	0.27251	1.18633
4.82692	3.9505	0.3106	1.21209
4.93734	4.28154	0.16267	1.22507
4.97156	4.53366	0.05584	1.22187
4.88766	4.63197	0.51494	1.20354
4.55718	4.50872	0.73353	1.17483
3.98674	4.13249	0.6494	1.14012
3.44666	3.62522	0.34818	1.10424
3.84005	3.37188	0.41075	1.07468
5.44766	3.74411	0.59438	1.05954
7.53114	4.59609	0.696	1.065
9.42855	5.72667	0.64773	1.09258
10.7989	7.01791	0.40403	1.13608
11.5263	8.08959	0.29371	1.18344
11.7378	8.58793	0.31071	1.22302
11.6616	8.45389	0.28522	1.24787
11.3821	7.82426	0.28638	1.2565
10.8512	6.9507	0.42962	1.25109
10.1564	6.10361	0.37636	1.23493
9.42191	5.41295	0.19908	1.21179
8.5523	4.82066	0.11742	1.1856
7.53254	4.18939	0.16639	1.16017
6.46479	3.45472	0.31529	1.14142
5.40633	2.68699	0.3074	1.13627
4.38656	2.03453	0.1546	1.14689
3.35271	1.61778	0.03229	1.17003
2.38279	1.49912	0.12572	1.20132
1.74564	1.72158	0.27762	1.23555
1.47688	2.19303	0.0984	1.26597
1.40342	2.73257	0.23238	1.28686
1.45935	3.2408	0.33977	1.29532
1.74685	3.73725	0.37277	1.29078
2.36397	4.28598	0.32913	1.27443
3.18092	4.89743	0.06886	1.24905
3.91937	5.52589	0.05203	1.21918
4.75934	6.16419	0.05694	1.18916
5.83802	6.92085	0.16827	1.16062
7.20483	7.97389	0.17724	1.13422
9.26166	9.45014	0.08334	1.11284
11.871	11.3259	0.13771	1.10127
14.0019	13.3964	0.09886	1.1046
14.8711	15.223	0.04072	1.12636
14.2172	16.0121	0.17374	1.16571
12.1969	15.0177	0.16941	1.21417
9.72461	12.3917	0.14643	1.25339
7.43665	9.07439	0.08722	1.26202
5.28926	5.86821	0.09487	1.23466
3.39015	3.24399	0.15212	1.1909
1.88689	1.56424	0.23061	1.15446
0.9557	0.82774	0.35021	1.13062
0.74293	0.54024	0.35554	1.11165
0.78268	0.39651	0.35503	1.09318
0.75107	0.41094	0.45378	1.08089
0.64662	0.50889	0.54179	1.08477
0.40939	0.59854	0.71936	1.11405
0.42021	0.65668	1.03707	1.18733
0.4587	0.68933	1.53554	1.34314
0.29034	0.70978	2.1402	1.6132
0.18021	0.72828	2.85052	1.99501
0.24179	0.74902	3.64302	2.46843
0.29506	0.77	4.30023	2.98019
0.31246	0.78685	4.68766	3.44151
0.26252	0.79673	4.94334	3.80007
0.1259	0.79761	5.24166	4.08243
0.12873	0.78931	5.63543	4.35367
0.21674	0.77456	5.98761	4.64994
0.35965	0.7589	6.17139	4.94797
0.30132	0.75019	6.14981	5.18533
0.15907	0.75194	5.94265	5.29138
0.23467	0.75794	5.63016	5.215
0.22388	0.75806	5.26314	4.95229
0.19861	0.748	4.80493	4.56307
0.29639	0.73313	4.33473	4.13085
0.27422	0.72241	4.42223	3.65531
0.4712	0.71904	5.73239	3.20864
0.33554	0.71926	7.81538	3.44644
0.18289	0.7191	10.0154	4.93644
0.2427	0.71887	11.9226	7.00258
0.22919	0.72164	13.1843	8.76106
0.16385	0.73125	13.7156	9.76605
0.0866	0.75159	13.6809	9.98463
0.193	0.78418	13.2221	9.56961
0.47291	0.82398	12.4365	8.77141
0.52476	0.86084	11.5064	7.85335
0.4309	0.88674	10.5289	6.94323
0.30254	0.89897	9.38937	6.04742
0.1898	0.89775	8.25445	5.16844
0.16919	0.88388	7.37434	4.33588
0.20312	0.85885	6.45995	3.55208
0.14548	0.82627	5.55472	2.76239
0.16418	0.7903	4.78284	1.93595
0.12118	0.75398	4.09036	1.17305
0.17731	0.72227	3.57114	0.83133
0.2555	0.70272	3.11525	1.18687
0.19767	0.69968	2.88095	1.82477
0.14217	0.71178	3.19436	2.57616
0.07389	0.73495	3.91811	3.40403
0.04506	0.76364	4.70416	4.35006
0.15327	0.79069	6.26035	5.63627
0.14057	0.80943	8.69361	7.63849
0.15073	0.8154	11.5022	10.6223
0.21285	0.80671	14.3176	14.419
0.2318	0.78507	17.0912	18.3082
0.32188	0.7586	19.2446	21.2983
0.47778	0.74408	19.4959	22.6068
0.60453	0.76153	17.6535	21.7678
0.74471	0.82297	14.5345	18.7127
0.96196	0.93095	10.9671	14.2099
1.24112	1.08906	7.59931	9.58261
1.57632	1.29853	4.84166	5.71995
1.9799	1.54838	2.66691	2.93473
2.40718	1.83173	1.11069	1.38525
2.85839	2.14394	0.43123	0.89835
3.25855	2.46394	0.77374	0.82327
3.60622	2.76332	0.96968	0.87806
4.03291	3.02731	1.0501	0.98815
4.45059	3.26016	1.06778	1.08086
4.69869	3.46567	0.88573	1.1348
4.89681	3.64133	0.72363	1.15508
5.20007	3.80543	0.67691	1.1485
5.55302	3.99779	0.78813	1.12476
5.82075	4.24144	0.78704	1.09751
5.96869	4.51017	0.54651	1.08067
6.0279	4.74664	0.40901	1.08279
6.02407	4.9167	0.27834	1.10366
5.89757	5.01669	0.16876	1.13593
5.62499	5.02438	0.17608	1.16918
5.25298	4.85517	0.41552	1.19478
4.71353	4.38205	0.32419	1.20855
4.12466	3.54716	0.66973	1.2113
4.44162	2.66204	0.48154	1.20775
6.33915	2.85545	0.31659	1.20235
8.88257	4.42454	0.20133	1.19526
11.0994	6.49964	0.10991	1.18349
12.5635	8.46057	0.32198	1.16762
13.3212	9.70137	0.19805	1.15649
13.4644	9.95109	0.30378	1.16091
13.2384	9.41806	0.31208	1.18201
12.7652	8.4725	0.30177	1.2114
11.8869	7.44077	0.24018	1.24104
10.9207	6.53442	0.30612	1.26672
9.94827	5.79496	0.29688	1.28587
8.77332	5.12523	0.26261	1.29726
7.61801	4.37906	0.36991	1.30076
6.56605	3.50084	0.27515	1.2954
5.50098	2.60275	0.22178	1.27901
4.43031	1.89966	0.10959	1.25155
3.20359	1.55893	0.07234	1.21955
2.09069	1.63106	0.21305	1.19407
1.66376	2.09307	0.20424	1.18277
1.7087	2.77568	0.15884	1.18669
1.92452	3.47941	0.25645	1.20232
2.39752	4.12719	0.07971	1.22335
2.91474	4.77107	0.07782	1.2431
3.68417	5.48672	0.05328	1.2581
4.79147	6.26513	0.07693	1.26828
5.90547	7.0267	0.14979	1.27398
6.69253	7.71912	0.16993	1.27453
7.24219	8.37813	0.11145	1.26808
8.10387	9.08288	0.10274	1.25243
9.26257	9.89834	0.06143	1.22709
10.5115	10.89	0.134	1.19471
12.0886	12.1301	0.07235	1.16133
13.7499	13.5813	0.10751	1.13486
14.5958	14.9006	0.23028	1.12298
14.1571	15.5144	0.08899	1.13245
12.4429	14.9777	0.11059	1.16422
9.89075	13.1052	0.09428	1.20528
7.33893	10.0208	0.10379	1.23411
5.10264	6.41595	0.13148	1.23994
3.12923	3.32948	0.23342	1.23089
1.71487	1.41563	0.29001	1.22092
0.9285	0.70064	0.36475	1.21458
0.68487	0.57809	0.52629	1.20603
0.80677	0.51219	0.70795	1.19305
0.81044	0.49569	1.03274	1.19472
0.77503	0.51718	1.60917	1.26217
0.71904	0.53098	2.24582	1.4702
0.52208	0.53043	2.76916	1.85446
0.41778	0.54003	3.2773	2.35106
0.43691	0.57749	3.7942	2.83435
0.26446	0.634	4.1614	3.2004
0.1397	0.6923	4.38679	3.4298
0.10503	0.7433	4.53022	3.57847
0.24711	0.78562	4.62299	3.71095
0.394	0.81758	4.76107	3.85554
0.40445	0.83381	4.91592	4.01073
0.37598	0.82702	5.0169	4.16766
0.26389	0.79349	5.12515	4.30872
0.19708	0.73906	5.10177	4.40234
0.17192	0.6779	4.84149	4.4187
0.25565	0.62552	4.54733	4.34081
0.24003	0.59297	4.28178	4.17696
0.0484	0.58412	3.9868	3.98215
0.23411	0.5966	3.59345	3.82738
0.32785	0.62442	3.26212	3.70687
0.29739	0.65954	3.40275	3.49858
0.17812	0.6948	4.4868	3.13294
0.13505	0.72649	6.46374	2.98779
0.10793	0.75192	8.7001	3.8569
0.07003	0.76745	10.6608	5.57101
0.28524	0.77193	12.1105	7.30125
0.36072	0.7683	13.0106	8.56206
0.06496	0.76072	13.3169	9.20419
0.15568	0.7528	13.013	9.20876
0.23076	0.74726	12.3171	8.69755
0.19888	0.74561	11.5258	7.89675
0.26905	0.74865	10.808	6.97147
0.3518	0.75673	10.0477	6.00844
0.39937	0.76901	9.05401	5.08626
0.32299	0.78269	7.78452	4.25766
0.23418	0.79321	6.5413	3.49964
0.17092	0.79539	5.80938	2.73017
0.07773	0.78569	5.29961	1.91103
0.11852	0.7643	4.59136	1.12636
0.07686	0.73485	3.78485	0.64885
0.12181	0.70266	3.15278	0.90423
0.02535	0.67187	2.64538	1.55378
0.13619	0.64458	2.33881	2.38177
0.17159	0.62397	3.05063	3.31927
0.16378	0.61458	4.2654	4.33124
0.13298	0.6179	5.68144	5.53808
0.11141	0.63161	7.65195	7.25878
0.15575	0.65233	10.3443	9.82294
0.09396	0.67569	13.2745	13.2257
0.12999	0.69665	16.1007	16.8935
0.10279	0.71328	18.2871	19.909
0.13993	0.72784	18.9672	21.5174
0.15639	0.74125	17.7248	21.2387
0.11395	0.74579	14.8517	18.9137
0.12876	0.7312	11.4381	15.1077
0.1894	0.70273	8.33987	10.8811
0.1852	0.67493	5.5047	6.97816
0.22857	0.65254	3.16342	3.79908
0.3077	0.63613	1.58818	1.69753
0.34166	0.63313	0.58199	0.73755
0.52312	0.66059	0.7362	0.52571
0.88751	0.74908	0.78016	0.63832
1.4557	0.94758	0.81647	0.8566
2.0458	1.29387	1.09127	1.03867
2.56553	1.75737	0.84643	1.14082
3.06251	2.23216	0.50641	1.17764
3.42931	2.60328	0.54173	1.17748
3.68951	2.83624	0.3367	1.16196
3.9275	2.98895	0.19199	1.14236
4.24751	3.14374	0.28501	1.12374
4.75845	3.35584	0.14902	1.10935
5.30131	3.65717	0.04786	1.10224
5.76009	4.06407	0.09907	1.10568
6.26037	4.54698	0.0999	1.12056
6.71478	5.02193	0.24463	1.1417
6.93487	5.39898	0.13164	1.1607
6.97303	5.62172	0.07159	1.17315
6.82038	5.66834	0.12915	1.18054
6.44805	5.52988	0.18418	1.18578
5.92181	5.20931	0.3145	1.18845
5.32367	4.76159	0.36113	1.18477
4.63571	4.28633	0.15633	1.17208
3.95456	3.81921	0.23598	1.15311
4.52968	3.36054	0.48215	1.13446
6.72018	3.52197	0.51819	1.12173
9.37977	5.20757	0.29086	1.1176
11.7082	7.72186	0.13861	1.12368
13.1628	9.92628	0.20309	1.14197
13.5931	11.047	0.37043	1.17258
13.3302	10.848	0.17919	1.20978
12.7694	9.68203	0.17377	1.24386
12.0542	8.18531	0.23884	1.26827
11.1937	6.89421	0.40985	1.28178
10.2493	6.02518	0.30585	1.2853
9.37272	5.46228	0.19707	1.28064
8.45102	4.97995	0.12789	1.2697
7.38929	4.44281	0.08516	1.2529
6.32635	3.83716	0.08889	1.22999
5.2297	3.20803	0.10262	1.20283
4.0862	2.63135	0.15213	1.17735
2.93854	2.28804	0.12625	1.16167
1.9265	2.36645	0.12506	1.16086
1.31526	2.78037	0.20315	1.17416
1.04451	3.31241	0.17455	1.19681
1.79517	3.85381	0.14143	1.22296
2.57452	4.3703	0.17254	1.2481
3.05343	4.81536	0.04763	1.27006
3.639	5.15287	0.23972	1.28665
4.28608	5.40803	0.2574	1.29428
4.91913	5.67613	0.08435	1.29016
5.30948	6.09681	0.06351	1.27293
5.58984	6.82216	0.09991	1.24181
7.40954	8.02921	0.10574	1.19881
10.7652	9.92411	0.12958	1.15128
13.6336	12.5152	0.07764	1.11082
15.108	15.224	0.23868	1.08874
14.9672	17.0312	0.19814	1.0902
13.3986	17.1566	0.18108	1.11138
10.9093	15.3279	0.25974	1.14134
8.17197	11.7769	0.3226	1.16724
5.83639	7.46315	0.28864	1.18094
3.86214	3.75397	0.24388	1.18448
2.15578	1.5142	0.37237	1.1885
1.04491	0.75187	0.69525	1.20458
0.63273	0.56789	1.11246	1.24787
0.68408	0.40536	1.47578	1.34729
0.85712	0.40471	1.8285	1.53892
0.98683	0.50589	2.13343	1.82168
0.89114	0.57622	2.48908	2.12965
0.67699	0.60768	2.8709	2.38173
0.4923	0.62997	3.02039	2.53699
0.22405	0.66142	3.056	2.60771
0.1326	0.7001	3.10033	2.64234
0.16546	0.73742	3.19337	2.69488
0.1891	0.76902	3.35508	2.80375
0.1044	0.79559	3.52117	2.98247
0.16144	0.81734	3.73105	3.21842
0.2177	0.82943	4.11382	3.48297
0.222	0.82259	4.524	3.75339
0.26105	0.79104	4.73835	4.02423
0.16582	0.74065	4.85521	4.28106
0.19058	0.68639	4.8842	4.47977
0.23618	0.64304	4.7271	4.56831
0.22015	0.61935	4.4299	4.51049
0.32573	0.61682	4.11228	4.3141
0.25172	0.63118	3.91286	4.05979
0.18444	0.65595	3.89547	3.84188
0.10727	0.68501	4.31002	3.65742
0.11698	0.71434	5.58052	3.46142
0.08575	0.7424	7.42886	3.53359
0.10718	0.76719	9.30346	4.42747
0.3151	0.78458	10.8079	5.95158
0.19097	0.79132	11.6831	7.40952
0.14896	0.78682	12.0246	8.31268
0.17432	0.77245	11.9173	8.51419
0.33538	0.75185	11.4832	8.13858
0.23976	0.7306	11.0003	7.42092
0.08622	0.71412	10.3855	6.58937
0.22723	0.70608	9.53027	5.7817
0.25212	0.70798	8.47554	4.99327
0.25251	0.71936	7.29632	4.15656
0.2556	0.7372	5.99822	3.27027
0.17628	0.75509	4.77407	2.43253
0.14887	0.76511	4.10552	1.76658
0.15208	0.76188	3.82085	1.36055
0.15688	0.74475	3.34711	1.30726
0.09833	0.71698	2.67125	1.58186
0.10382	0.68439	2.24238	2.01189
0.10048	0.65332	2.10619	2.4949
0.2528	0.62902	2.40713	3.03046
0.19728	0.61689	3.07758	3.62924
0.16917	0.62097	3.63921	4.23748
0.16842	0.64	4.13442	4.77944
0.18094	0.66917	4.67931	5.24329
0.15269	0.70368	5.29065	5.71395
0.11377	0.73699	5.94558	6.3241
0.17531	0.76097	6.82923	7.17005
0.14506	0.77133	8.04787	8.28587
0.09036	0.76891	9.54652	9.70456
0.13703	0.75584	11.0104	11.4531
0.11927	0.73399	12.3961	13.3605
0.05941	0.70698	13.652	14.9912
0.14302	0.68085	13.6692	15.8534
0.18821	0.65991	12.2443	15.5481
0.1368	0.64282	10.2783	13.8903
0.19461	0.62795	7.90835	11.0986
0.21724	0.62569	5.57566	7.77675
0.35139	0.65678	3.79069	4.68996
0.51657	0.73185	2.34151	2.46029
0.84883	0.86202	1.17555	1.24129
1.39564	1.0772	0.42609	0.77074
1.85496	1.39355	0.46312	0.74039
2.29884	1.77676	0.64193	0.88727
2.82401	2.15578	0.67773	1.03932
3.17937	2.46723	0.65221	1.12715
3.39493	2.68611	0.66921	1.15009
3.60563	2.82847	0.61684	1.1385
3.78659	2.92979	0.37252	1.12147
3.94479	3.02119	0.12492	1.11583
4.07747	3.12779	0.34593	1.12786
4.25315	3.28025	0.30898	1.15602
4.64493	3.51724	0.06159	1.19356
5.13503	3.86439	0.10483	1.23173
5.62673	4.31046	0.19439	1.26335
6.20349	4.80893	0.09648	1.28493
6.7609	5.30662	0.11298	1.29482
7.14294	5.77314	0.14192	1.29098
7.37117	6.17516	0.21391	1.2724
7.37529	6.44726	0.2288	1.23912
7.13223	6.50907	0.12231	1.19158
6.63055	6.25151	0.24619	1.13484
5.86914	5.56634	0.18352	1.08093
5.62112	4.5932	0.33018	1.04454
6.97305	4.28219	0.42216	1.03747
9.56749	5.68591	0.36895	1.06299
12.1953	7.87601	0.4142	1.1125
14.0433	9.85233	0.3646	1.17038
15.053	11.2078	0.53375	1.22367
15.5169	11.6616	0.23957	1.26696
15.6349	11.2585	0.23898	1.30034
15.3943	10.4426	0.13476	1.32354
14.8583	9.61642	0.05583	1.33358
14.0858	8.89392	0.09443	1.32853
13.145	8.22212	0.22654	1.30944
12.0499	7.52659	0.24816	1.27972
10.7398	6.70881	0.15816	1.24704
9.31186	5.63841	0.14625	1.22173
7.70449	4.27411	0.15488	1.21044
5.90696	2.72357	0.05447	1.21373
4.3471	1.15845	0.07125	1.22831
3.25347	0.54985	0.36304	1.24831
2.5587	2.06737	0.26973	1.26738
3.07628	3.74074	0.21942	1.28222
4.48252	5.41986	0.21377	1.2927
6.21832	7.00693	0.21658	1.29822
8.1217	8.6408	0.09885	1.29483
10.3861	10.7827	0.10154	1.27785
13.7523	13.9516	0.11759	1.24784
17.8575	18.155	0.16754	1.21182
21.0733	22.4686	0.06726	1.181
22.1298	25.3776	0.11793	1.17082
20.724	25.6857	0.14301	1.19267
17.5546	22.9669	0.31858	1.23438
13.6974	17.6312	0.34096	1.26077
9.8176	11.1685	0.13711	1.24856
6.39921	5.59728	0.22738	1.21261
3.84038	2.09192	0.43302	1.19003
1.94699	0.78988	0.48204	1.20138
0.58569	0.82995	0.53176	1.23707
0.70757	0.80297	0.83914	1.29048
1.02651	0.72945	1.29519	1.39036
1.15567	0.69095	1.76648	1.58117
1.13066	0.65673	2.22878	1.85677
0.90248	0.61629	2.66888	2.15033
0.76725	0.58768	2.95227	2.40702
0.70295	0.58613	3.063	2.60922
0.41901	0.61055	3.22947	2.75489
0.23025	0.65331	3.48099	2.86269
0.21071	0.70465	3.69945	2.97316
0.25239	0.75441	3.94494	3.1215
0.26795	0.79482	4.23988	3.31868
0.18246	0.82147	4.51976	3.56343
0.16284	0.83197	4.78189	3.85666
0.26533	0.82423	5.02187	4.18269
0.24684	0.79883	5.26728	4.49476
0.13032	0.75862	5.44062	4.73636
0.07467	0.70594	5.41381	4.86322
0.07142	0.64581	5.21314	4.8568
0.05393	0.58884	4.95384	4.7347
0.0669	0.54858	4.61902	4.54259
0.18547	0.53648	4.1705	4.29884
0.1823	0.55614	3.92435	3.91299
0.08154	0.60112	4.81234	3.31796
0.0952	0.65839	6.9464	3.02923
0.04867	0.71377	9.44908	4.16896
0.20309	0.75706	11.6918	6.34314
0.06431	0.7864	13.3829	8.45307
0.32643	0.80645	14.2917	9.93546
0.21447	0.82103	14.4788	10.6352
0.18618	0.82865	14.1702	10.5573
0.19232	0.82412	13.5548	9.87915
0.12362	0.80441	12.7341	8.89398
0.26778	0.77378	11.7018	7.79656
0.40448	0.74235	10.6221	6.66674
0.38848	0.72055	9.51271	5.57643
0.23751	0.71462	8.37362	4.58972
0.09559	0.72345	7.32831	3.69853
0.10249	0.73781	6.30211	2.82038
0.28122	0.74668	5.26395	1.91519
0.17524	0.74645	4.51841	1.12203
0.05624	0.74141	3.98042	0.91567
0.11516	0.73612	3.04339	1.42373
0.13703	0.73084	2.67469	2.18018
0.08598	0.72326	3.61068	3.10199
0.10849	0.71175	4.65262	4.16917
0.1265	0.69564	5.42946	5.38893
0.09915	0.67456	6.90606	6.95317
0.07856	0.65002	9.97364	9.28529
0.03069	0.62675	14.0173	12.7609
0.10547	0.61132	17.9057	17.2067
0.22562	0.6103	20.5361	21.5872
0.25322	0.62767	20.9982	24.3885
0.24577	0.6594	19.3581	24.5329
0.1842	0.69138	16.3161	21.8254
0.18334	0.70834	12.64	16.8707
0.33563	0.70526	9.08189	11.077
0.47628	0.69781	5.96778	6.13207
0.59749	0.72516	3.42084	2.90707
0.91548	0.83093	1.58456	1.25027
1.56799	1.04708	0.55953	0.6451
2.42338	1.39343	0.91812	0.56924
3.12734	1.85911	1.01308	0.71138
3.4944	2.35637	0.97465	0.89137
3.66561	2.7474	1.17399	1.02526
3.79304	2.96087	1.11876	1.11184
3.86358	3.03353	0.8944	1.17089
3.8687	3.04646	0.59056	1.21689
3.9403	3.07272	0.23632	1.25757
4.15372	3.167	0.18101	1.29281
4.43674	3.35534	0.18248	1.31579
4.72991	3.62407	0.318	1.32127
5.06267	3.93821	0.3187	1.30889
5.38396	4.27263	0.22305	1.27979
5.67217	4.62296	0.24579	1.23627
5.94105	4.97519	0.21924	1.1846
6.10753	5.26924	0.33929	1.13675
6.02272	5.39665	0.43404	1.10627
5.65905	5.20742	0.25103	1.09911
4.9516	4.56321	0.51576	1.11023
4.1995	3.49993	0.87145	1.12951
4.70376	2.64498	0.94186	1.14906
6.61184	3.30276	0.41398	1.16615
8.9066	4.98497	0.82306	1.18213
10.878	6.74456	0.45985	1.19852
12.1249	8.21068	0.23176	1.21345
12.6175	9.06078	0.33549	1.22239
12.5614	9.17414	0.23007	1.22161
12.3351	8.73798	0.15661	1.21137
12.1376	8.02007	0.09306	1.19751
11.7261	7.23859	0.06929	1.1884
10.965	6.54113	0.11114	1.18924
9.97898	5.95719	0.27775	1.20022
8.92789	5.39423	0.36299	1.21856
7.84231	4.72109	0.16641	1.23928
6.68325	3.89685	0.16348	1.25629
5.52438	3.02227	0.07834	1.26558
4.42443	2.26493	0.04088	1.26599
3.35286	1.75014	0.06285	1.25714
2.33608	1.59732	0.12085	1.23862
1.54967	1.949	0.09577	1.2115
1.2588	2.64964	0.08231	1.18002
1.52851	3.41499	0.07794	1.15004
2.23741	4.10687	0.15323	1.12563
2.98102	4.73995	0.14997	1.10958
3.8151	5.38116	0.07889	1.10497
4.81803	6.05768	0.09064	1.11343
5.79794	6.7859	0.16986	1.13445
6.82098	7.67401	0.04373	1.16492
8.38971	8.96121	0.12546	1.19683
10.8627	10.8812	0.10654	1.21946
13.4141	13.3841	0.0539	1.22687
15.1791	15.9261	0.07909	1.2201
15.957	17.6502	0.18071	1.2037
15.3938	17.8837	0.15805	1.18334
13.5319	16.3948	0.1052	1.16307
11.1233	13.455	0.23986	1.14254
8.70259	9.98933	0.2076	1.1189
6.50806	7.09108	0.23598	1.09417
4.74368	5.02746	0.37216	1.07981
3.26798	3.41995	0.47637	1.08698
1.97624	2.05987	0.58059	1.11452
1.33327	0.99668	0.76759	1.16101
1.058	0.45374	1.0626	1.25882
0.99497	0.48249	1.56163	1.48089
0.98673	0.56466	2.18011	1.86265
0.84333	0.61807	2.75586	2.33109
0.73849	0.65336	3.36612	2.7676
0.6638	0.66715	3.9664	3.10968
0.47601	0.6728	4.32681	3.35813
0.29285	0.68458	4.479	3.53212
0.29611	0.7043	4.64538	3.66298
0.29664	0.72718	4.88617	3.79811
0.40962	0.75225	5.0946	3.97547
0.28069	0.78383	5.29557	4.19158
0.25046	0.82503	5.456	4.40776
0.24807	0.86978	5.45236	4.58544
0.38909	0.90397	5.31255	4.69375
0.4248	0.91354	5.1535	4.70723
0.26274	0.89223	4.93416	4.62382
0.17675	0.84519	4.60427	4.46101
0.14505	0.78519	4.35274	4.24862
0.15174	0.72562	4.15787	4.04736
0.10644	0.67524	4.10038	3.90579
0.11712	0.63826	4.67101	3.77062
0.14684	0.61914	6.31053	3.58572
0.15619	0.62115	8.66126	3.76157
0.17787	0.64	10.8381	5.01007
0.23622	0.66759	12.4124	7.00043
0.22009	0.70099	13.4374	8.85717
0.36811	0.74226	13.9216	9.98058
0.19817	0.79052	13.8426	10.1935
0.16429	0.83806	13.3652	9.6805
0.1719	0.87439	12.7144	8.77305
0.12381	0.89248	11.8971	7.76619
0.28372	0.88962	10.8073	6.81466
0.42641	0.86663	9.50662	5.89711
0.40048	0.83011	8.18885	4.92143
0.28682	0.79016	7.01244	3.86683
0.10211	0.75389	6.0497	2.80704
0.11993	0.72509	5.16702	1.81943
0.26697	0.70643	4.2635	0.95693
0.14046	0.69835	3.62986	0.75317
0.13713	0.69901	3.28047	1.48382
0.10424	0.70584	2.83283	2.29555
0.15386	0.71597	2.82709	3.02179
0.18777	0.72626	3.50866	3.71988
0.10639	0.73491	4.41419	4.48241
0.13486	0.74205	5.00167	5.34731
0.13115	0.74775	5.71791	6.32692
0.05104	0.75009	7.31483	7.51383
0.10951	0.74656	9.72808	9.11674
0.17477	0.73749	12.2808	11.2995
0.22417	0.72588	14.238	13.9489
0.14072	0.71477	15.8077	16.5824
0.13426	0.70769	16.9884	18.5357
0.17376	0.71001	17.0359	19.316
0.16364	0.72456	15.764	18.6985
0.24401	0.74588	13.4808	16.6984
0.31116	0.76986	10.6093	13.7187
0.48182	0.81479	7.63324	10.3721
0.81869	0.92466	5.11911	7.07474
1.32787	1.12748	3.20372	4.17441
1.94394	1.40354	1.70028	2.10327
2.39754	1.71467	0.70896	1.0273
2.60356	2.00633	0.44565	0.66999
2.77586	2.21026	0.73448	0.66032
2.94947	2.30096	0.80153	0.78463
2.99294	2.31769	0.72759	0.91267
3.03276	2.32391	0.74402	0.99919
3.16869	2.37151	0.6509	1.05384
3.30955	2.48632	0.42526	1.0994
3.48075	2.66565	0.27569	1.14933
3.7894	2.89968	0.16572	1.20237
4.2222	3.19738	0.1089	1.24932
4.7546	3.57918	0.27605	1.28168
5.3243	4.04329	0.05902	1.29552
5.83435	4.5398	0.59468	1.29022
6.28701	4.9958	0.62386	1.26649
6.66357	5.36903	0.35321	1.22712
6.84521	5.64215	0.26348	1.17577
6.80487	5.79015	0.2407	1.11588
6.59069	5.79786	0.28271	1.05588
6.28488	5.6809	0.35488	1.00923
5.7577	5.42775	0.34533	0.98483
4.99422	4.90593	0.24358	0.98323
5.02144	4.08229	0.05827	1.00154
6.90215	3.86726	0.2239	1.03559
9.57267	5.65904	0.18573	1.07822
11.8717	8.41449	0.2705	1.11992
13.3528	10.5448	0.29476	1.15338
14.0182	11.3487	0.36444	1.17737
14.1437	10.9711	0.25512	1.19474
13.8625	9.93031	0.19358	1.20708
13.3399	8.75332	0.1558	1.21334
12.6814	7.79465	0.21255	1.21233
11.8527	7.10596	0.30449	1.20596
10.9722	6.52887	0.2419	1.20055
10.0247	5.91369	0.14312	1.20296
8.93487	5.2176	0.09572	1.21443
7.74106	4.44197	0.19255	1.23065
6.38923	3.56319	0.11411	1.24671
5.18831	2.61091	0.12167	1.25897
3.91973	1.82383	0.09406	1.26443
2.25999	1.72926	0.14083	1.26135
1.56153	2.37765	0.23224	1.2489
1.9139	3.31086	0.15728	1.22624
2.49012	4.32574	0.06582	1.19417
3.42837	5.29215	0.02081	1.15752
4.29917	6.10991	0.0456	1.12516
5.19144	6.77329	0.05536	1.10702
6.13963	7.37025	0.07145	1.10914
6.75346	8.01179	0.08439	1.13123
7.53846	8.78551	0.06906	1.16705
9.17569	9.80698	0.26124	1.20517
11.5799	11.2711	0.23809	1.23297
14.1735	13.3156	0.12782	1.2435
16.0809	15.6939	0.21242	1.23765
16.4129	17.6985	0.26474	1.22092
15.0901	18.4716	0.22971	1.19989
12.6236	17.3009	0.2384	1.17796
9.89816	14.0306	0.22374	1.15236
7.32778	9.5161	0.32868	1.11812
4.86131	5.24739	0.46419	1.07846
3.02164	2.36509	0.58821	1.05383
1.96116	1.24007	0.88038	1.08371
1.29077	1.02391	1.37318	1.23097
0.90339	0.77173	1.96253	1.56139
1.15927	0.55187	2.63835	2.06821
1.28122	0.54465	3.41333	2.6407
1.13769	0.62885	4.1578	3.14208
0.74333	0.68381	4.64353	3.51465
0.27993	0.71204	4.87605	3.78511
0.18729	0.73334	5.04695	3.99474
0.22155	0.74588	5.24089	4.16369
0.16063	0.74499	5.38321	4.29737
0.33682	0.73284	5.44333	4.39659
0.43201	0.71496	5.41449	4.45395
0.33025	0.69681	5.22586	4.45306
0.21046	0.68316	4.90151	4.38212
0.33615	0.6772	4.54602	4.23417
0.19467	0.67787	4.20388	4.00668
0.16277	0.6802	3.85426	3.73153
0.2572	0.67993	3.44266	3.49379
0.25412	0.67748	3.00972	3.38965
0.13436	0.67567	2.7232	3.45199
0.10417	0.67493	2.63954	3.64069
0.12092	0.67263	2.78175	3.87119
0.33228	0.66634	3.52436	4.04489
0.38896	0.6573	5.1203	4.17005
0.18774	0.64936	7.21928	4.47597
0.20222	0.646	9.3322	5.31577
0.21971	0.65024	11.1231	6.68489
0.20027	0.66495	12.3703	8.05945
0.35412	0.69107	12.9826	8.95522
0.3359	0.72717	12.8755	9.19181
0.33728	0.7701	12.296	8.78307
0.31213	0.81276	11.5736	7.91942
0.24399	0.845	10.6642	6.88349
0.4564	0.86047	9.70353	5.84323
0.51264	0.85858	8.77808	4.83569
0.33238	0.84136	7.61866	3.88325
0.22543	0.81226	6.35049	3.01768
0.14094	0.77603	5.53029	2.23506
0.14364	0.73757	4.8927	1.50674
0.05236	0.70075	4.01064	0.95551
0.16806	0.66897	3.25258	1.00275
0.20776	0.64857	2.8023	1.46566
0.14526	0.64719	2.66807	1.92503
0.17731	0.66517	2.49513	2.3213
0.16252	0.69432	2.17972	2.70526
0.20738	0.72647	2.3948	3.1082
0.16066	0.75647	3.0607	3.53329
0.28347	0.77912	3.89685	4.01043
0.15747	0.78973	4.6536	4.62596
0.1767	0.78532	5.26102	5.47765
0.09607	0.76377	6.48161	6.64497
0.09044	0.72506	9.05451	8.2506
0.12479	0.67429	12.2478	10.5099
0.0474	0.62414	14.9468	13.5137
0.1491	0.59145	16.5365	16.7721
0.1784	0.58773	16.6537	19.2542
0.13703	0.61184	15.1678	20.0141
0.19166	0.65314	12.44	18.5211
0.15322	0.70042	9.22747	14.8377
0.21186	0.74505	6.34631	9.95798
0.33344	0.79084	4.0642	5.42832
0.55567	0.8629	2.30293	2.30766
1.01507	0.98902	1.06469	0.75522
1.51111	1.17428	0.47935	0.33843
2.02345	1.40802	0.62343	0.43551
2.49194	1.67658	0.78894	0.71163
2.72244	1.94186	0.83403	0.93069
2.81461	2.14429	0.75056	1.03641
2.91419	2.26146	0.70321	1.06444
3.06564	2.33215	0.57549	1.06473
3.28709	2.41662	0.33102	1.07098
3.49738	2.55311	0.27926	1.09482
3.59443	2.74252	0.40699	1.13367
3.71865	2.96238	0.32094	1.18244
4.07296	3.20146	0.33798	1.23659
4.61325	3.48295	0.39381	1.28898
5.15539	3.83394	0.32038	1.32931
5.63276	4.23707	0.24682	1.3467
6.04401	4.63653	0.13406	1.33502
6.35906	4.98088	0.23767	1.29687
6.59886	5.25297	0.2747	1.24149
6.6332	5.45743	0.18061	1.1807
6.43978	5.59815	0.24725	1.12481
6.15023	5.66483	0.38772	1.08078
5.69946	5.57381	0.13094	1.05626
5.17529	5.14249	0.39419	1.05893
5.43318	4.27011	0.53568	1.08729
7.26618	3.68427	0.26292	1.13042
9.97302	5.18732	0.36366	1.17744
12.4856	8.12841	0.36405	1.21972
14.2211	10.859	0.28677	1.25011
15.0651	12.4179	0.1482	1.26688
15.2958	12.5276	0.21138	1.27343
15.2323	11.5613	0.19887	1.2725
14.8317	10.1709	0.18025	1.26356
14.1088	8.87715	0.12337	1.2458
13.3173	7.88281	0.12113	1.22309
12.443	7.10584	0.17002	1.20352
11.3017	6.35688	0.20946	1.19407
9.76664	5.48423	0.13534	1.19823
8.01049	4.43451	0.04357	1.21526
6.25024	3.21613	0.07795	1.23865
4.62563	1.84558	0.20962	1.25913
3.25536	0.81231	0.1958	1.27216
2.13901	1.88076	0.11202	1.28014
2.12354	3.39284	0.23072	1.28661
3.29031	4.76432	0.18059	1.28992
4.71112	6.0229	0.19196	1.28312
6.41592	7.31816	0.16208	1.2603
8.15332	8.81267	0.11301	1.22258
10.2657	10.7263	0.08535	1.17732
13.6125	13.3543	0.06627	1.13342
17.4978	16.81	0.09112	1.09873
20.3749	20.5647	0.09909	1.08117
20.908	23.4619	0.03431	1.09033
18.738	24.3029	0.16842	1.12903
15.1027	22.2677	0.18376	1.17681
11.4798	17.3641	0.12848	1.19531
8.17067	10.9822	0.26045	1.16588
5.2699	5.2939	0.30762	1.11457
3.19405	1.7613	0.42945	1.08536
1.67867	0.895	0.6467	1.09498
0.74463	0.96935	1.00956	1.14221
0.93284	0.76372	1.60112	1.2796
1.10303	0.5844	2.36769	1.64047
1.25331	0.57232	3.17725	2.28001
1.37533	0.60468	3.95029	3.04161
1.20757	0.61692	4.58458	3.68703
0.90726	0.6355	5.07335	4.09387
0.78257	0.68088	5.40236	4.29337
0.37538	0.7345	5.62407	4.37461
0.27182	0.77417	5.73794	4.41943
0.57879	0.7953	5.80261	4.4878
0.58873	0.80515	5.93157	4.60555
0.46786	0.8103	5.93271	4.75206
0.2025	0.80896	5.69693	4.86962
0.18535	0.79232	5.36514	4.89307
0.4094	0.75523	5.09341	4.77142
0.13895	0.70702	4.84848	4.50038
0.11958	0.66691	4.44886	4.16239
0.23394	0.6493	3.96816	3.87283
0.21293	0.6571	3.63072	3.63476
0.50237	0.68604	4.03749	3.33118
0.18367	0.72803	5.56617	3.12315
0.40079	0.77197	7.7219	3.82896
0.23199	0.80738	9.98786	5.67253
0.0237	0.82804	11.8507	7.82143
0.16971	0.83311	13.0595	9.47952
0.25132	0.82526	13.5327	10.2807
0.22574	0.80789	13.3581	10.2617
0.09587	0.78459	12.7562	9.61163
0.13181	0.7587	11.9437	8.5452
0.25994	0.733	11.0517	7.29418
0.47451	0.71219	10.0487	6.04123
0.30996	0.70252	8.83076	4.86875
0.19725	0.70597	7.46936	3.80368
0.22474	0.7187	6.33461	2.86157
0.07761	0.73622	5.45352	2.02901
0.15983	0.75628	4.522	1.2766
0.0889	0.77637	3.44734	0.75989
0.28951	0.79115	2.52778	0.97582
0.28023	0.79367	2.29632	1.6295
0.1081	0.7805	2.28168	2.36936
0.10265	0.75553	2.26389	3.07806
0.24627	0.72761	2.65403	3.67949
0.21482	0.70451	3.23908	4.1638
0.19207	0.68922	3.82801	4.58964
0.31951	0.68121	4.33934	5.03
0.27502	0.68012	4.93076	5.51958
0.26528	0.68607	5.66393	6.08222
0.19473	0.69736	6.52765	6.82568
0.10317	0.71006	8.16044	7.99449
0.12381	0.7205	10.8039	9.86228
0.07292	0.72714	13.2657	12.4503
0.11373	0.7306	14.7541	15.2446
0.12074	0.73401	15.1937	17.343
0.27164	0.74154	14.3808	17.9964
0.43678	0.75289	12.4504	16.8649
0.35912	0.75963	9.92846	14.0588
0.41556	0.75726	7.27732	10.3252
[truncated: 4,003 more rows]

## Sheet: Participant 5
Resultant linear accelerations
Left shoe		Right shoe
Motion capture system	Shoe-type IMU	Motion capture system	Shoe-type IMU
5.53761	1.44878	17.0283	6.88901
4.97254	1.32991	13.8423	2.38313
3.91871	1.47446	8.83214	3.01919
2.91203	1.60389	3.42091	7.07207
2.1265	1.67282	3.69303	10.5474
1.7346	1.74887	9.29975	13.3895
1.68355	1.84556	14.1868	15.8716
1.70058	1.90596	17.8038	18.0113
1.71055	1.88158	20.3771	19.5755
1.63776	1.78173	21.7951	20.3065
1.42773	1.65691	21.9768	20.1145
1.15563	1.56368	21.5405	19.1907
0.79821	1.52885	20.6221	17.7732
0.38464	1.5463	18.9522	15.902
0.13222	1.60387	16.6575	13.5586
0.2895	1.6821	13.5673	10.9548
0.5486	1.75476	10.1952	8.64506
0.7535	1.80394	8.61867	7.4143
0.88565	1.82294	8.76127	8.38265
0.9778	1.81018	10.5273	12.3
0.96569	1.76668	14.7304	18.3524
0.77083	1.69704	19.9048	24.8731
0.54304	1.60757	24.2517	30.2137
0.37434	1.53339	26.7845	33.5665
0.56147	1.5798	26.8214	34.6129
1.24136	1.84097	24.3651	32.462
2.04921	2.27861	20.2903	26.5283
3.02824	2.80617	15.6252	18.225
3.99466	3.37798	11.2514	10.2732
4.50537	3.89849	7.44263	4.56753
4.55848	4.18617	4.38712	1.57077
4.39677	4.14578	2.30051	0.92793
4.10587	3.83783	1.13446	0.8506
3.73634	3.38948	1.22904	0.70339
3.3416	2.97056	1.56602	0.62044
2.99629	2.75589	1.59158	0.55378
2.81915	2.78708	1.58553	0.45983
2.76704	2.96279	1.33292	0.38269
2.7761	3.18605	0.60138	0.37603
2.75735	3.41221	0.16298	0.42241
2.67615	3.60707	0.37831	0.48351
2.58315	3.74335	0.23017	0.546
2.56107	3.81439	0.10146	0.60603
2.49176	3.83395	0.17445	0.65202
2.34629	3.8318	0.5499	0.6709
2.14731	3.83911	0.49378	0.6572
1.92513	3.87373	0.0639	0.61048
1.79359	3.94389	0.30056	0.54415
1.66529	4.07086	0.21306	0.48705
1.38193	4.29845	0.32697	0.46008
1.23868	4.65709	0.17687	0.45949
1.45955	5.09522	0.69098	0.46564
1.91294	5.47555	0.73728	0.4651
2.7289	5.69086	0.36603	0.46208
4.0721	5.78762	0.12591	0.46991
5.73986	6.00653	0.06183	0.49541
7.29924	6.54392	0.22737	0.53371
8.51831	7.19562	0.75038	0.5764
9.41735	7.62149	0.95612	0.61784
10.034	7.71289	0.94242	0.65695
10.4331	7.54847	0.9377	0.69592
10.7248	7.29147	1.05003	0.7321
10.9067	7.07956	1.21254	0.7592
10.9193	6.91475	1.3103	0.7723
10.7388	6.69721	1.27823	0.76275
10.3575	6.32775	1.0419	0.72452
9.73526	5.77312	0.70318	0.67069
8.97793	5.03891	0.49487	0.633
8.20555	4.146	0.53412	0.63661
7.46751	3.24432	0.45137	0.67729
6.82584	2.69955	0.25015	0.73818
6.32354	2.83053	0.20243	0.80511
6.00512	3.4793	0.15951	0.85998
5.7933	4.3387	0.08654	0.88927
5.85544	5.29678	0.15448	0.89422
6.5398	6.36123	0.27286	0.88717
7.58993	7.46667	0.17272	0.88243
8.30132	8.40879	0.26918	0.88533
8.48075	8.9862	0.39593	0.89759
8.44654	9.14572	0.441	0.92939
8.58633	9.12972	0.41689	0.9858
9.2406	9.63923	0.26334	1.0462
10.5745	11.3674	0.09653	1.07569
12.4143	14.0091	0.21973	1.06315
14.3803	16.6138	0.30405	1.04342
16.3621	18.5967	0.4897	1.06808
17.9794	19.7385	0.79593	1.15117
18.4555	19.754	1.08234	1.26816
17.6575	18.4885	1.3162	1.40041
16.3714	16.2007	1.56992	1.54583
15.2179	13.6637	1.94697	1.71011
14.3301	11.949	2.38918	1.91446
13.4342	10.9345	2.77835	2.18612
12.07	9.49977	3.20191	2.53002
10.1137	7.33892	3.71529	2.9253
7.70026	4.76897	4.27814	3.35785
5.01962	2.18132	4.92809	3.84688
2.36417	0.26476	5.57023	4.41099
0.7066	1.61624	6.17502	5.02072
1.60808	2.32514	6.86456	5.60545
2.09597	2.28054	7.47172	6.09969
1.9756	1.73955	7.86213	6.48077
1.62095	1.05543	8.11191	6.73495
1.21934	0.59005	8.17508	6.80748
0.89933	0.53357	7.97421	6.65281
0.77991	0.53991	7.60045	6.30706
0.64843	0.43555	7.21705	5.86892
0.48593	0.28882	6.82605	5.4208
0.20497	0.22226	6.39858	4.93858
0.26906	0.25798	5.92057	4.28727
0.22741	0.30197	5.06935	3.43369
0.33051	0.33435	3.87382	2.93874
0.28995	0.36212	3.35576	3.72574
0.27292	0.38252	4.29379	5.2599
0.15664	0.39107	5.89526	6.80432
0.12891	0.38989	7.75744	8.18556
0.17626	0.38725	10.0735	9.4268
0.30605	0.38374	12.2622	10.6437
0.33997	0.37441	13.6452	11.8504
0.19069	0.366	14.3705	12.7737
0.20923	0.37783	14.7064	13.131
0.2376	0.42343	14.7154	12.858
0.23631	0.49318	14.4778	12.0608
0.24425	0.56867	14.1579	11.006
0.52313	0.63977	13.8409	10.0273
0.75972	0.70501	13.5218	9.30867
0.83398	0.76362	13.2056	8.80645
0.8114	0.80799	12.8405	8.36489
0.79794	0.82539	12.2532	7.86107
0.75668	0.80376	11.4372	7.24191
0.65115	0.74401	10.5792	6.52942
0.44062	0.6763	9.84212	5.87133
0.17413	0.64973	9.43054	5.43154
0.12316	0.68226	8.91081	5.18734
0.26311	0.74302	7.72631	5.02314
0.43497	0.79976	6.51624	5.03408
0.49586	0.84321	6.11896	5.56993
0.53406	0.87529	6.52834	6.79745
0.49936	0.89571	7.05011	8.64338
0.4101	0.89365	8.52469	11.2913
0.31045	0.85529	12.4477	15.2255
0.27422	0.78218	18.5441	20.5447
0.3262	0.7035	24.9337	26.5498
0.36285	0.68179	29.1348	31.882
0.57043	0.78547	29.7303	34.3471
0.9416	1.01577	26.968	31.9386
1.18096	1.29867	22.1388	25.2177
1.365	1.57034	16.6396	17.0493
1.68583	1.8295	11.5243	9.79146
2.09734	2.06146	7.29198	4.40274
2.40635	2.21312	4.08317	1.32776
2.51147	2.25653	1.83096	0.77873
2.47357	2.20755	0.69573	0.74603
2.37925	2.12246	1.26064	0.5112
2.31013	2.06673	1.61635	0.39923
2.32636	2.06304	1.64593	0.42376
2.28323	2.07996	1.52137	0.45264
2.09674	2.06925	1.2073	0.46614
1.86821	2.01539	0.77231	0.48327
1.57614	1.94227	0.46492	0.51023
1.17156	1.89678	0.31518	0.53202
0.74865	1.93494	0.17983	0.53353
0.4438	2.06964	0.15501	0.51821
0.35145	2.25754	0.25752	0.50283
0.41849	2.45681	0.1636	0.50123
0.48421	2.65519	0.1609	0.514
0.44143	2.84491	0.20872	0.53446
0.44988	3.00199	0.19568	0.55634
0.55316	3.11206	0.17023	0.57268
0.59003	3.19214	0.23197	0.58155
0.62394	3.27502	0.18525	0.5908
0.80628	3.38299	0.12475	0.6064
1.11403	3.51332	0.07379	0.61924
1.36661	3.6426	0.06157	0.61068
1.59739	3.74634	0.172	0.57374
1.83255	3.82298	0.22278	0.52603
1.99671	3.89839	0.18803	0.49391
2.13674	3.99938	0.15743	0.4854
2.17865	4.12521	0.54445	0.48847
2.11865	4.25137	0.70756	0.49116
2.08317	4.36125	0.39274	0.49396
1.98784	4.45816	0.05545	0.50534
1.80148	4.54947	0.07132	0.52957
1.63248	4.64029	0.09364	0.55892
1.52716	4.74352	0.16961	0.57897
1.36063	4.88883	0.20553	0.58186
1.05107	5.11144	0.17703	0.56991
0.78801	5.41872	0.11322	0.5503
0.58216	5.75722	0.17553	0.53221
0.87386	6.02113	0.1117	0.52317
2.23344	6.1302	0.07771	0.52325
4.15853	6.14532	0.09747	0.52642
5.90053	6.34452	0.20493	0.52855
7.44549	6.94451	0.28688	0.53156
8.70284	7.66515	0.23472	0.54128
9.46577	8.0797	0.53588	0.56341
9.85911	8.06541	0.38463	0.59788
10.1843	7.74096	0.15244	0.6356
10.4868	7.32618	0.08446	0.66508
10.625	6.98303	0.26013	0.67985
10.5859	6.68673	0.14247	0.67826
10.3895	6.31773	0.66337	0.66103
9.95432	5.80862	1.04544	0.63066
9.31224	5.1938	0.70854	0.59261
8.69493	4.53522	0.17147	0.55384
8.37565	3.84553	0.31217	0.51994
8.08037	3.16017	0.53712	0.49718
7.40525	2.62029	0.73763	0.49387
6.48849	2.39847	0.83455	0.51461
5.52881	2.55365	0.70546	0.55414
5.11995	3.1079	0.43612	0.59866
5.37924	4.15323	0.40845	0.63219
5.82793	5.72203	0.46567	0.64221
7.10915	7.78128	0.83356	0.62499
9.39897	10.4261	1.00735	0.58886
12.5721	13.9101	0.87791	0.55164
16.2729	18.1409	0.59647	0.53749
19.5943	22.2635	0.49553	0.57542
21.3288	24.9384	0.68777	0.68972
20.6714	24.9163	1.02704	0.8806
18.0391	21.7852	1.40362	1.12975
14.6053	16.5386	1.78852	1.42653
11.4631	11.1369	2.20922	1.76106
9.19881	7.39677	2.66947	2.11185
7.56987	5.65904	3.16875	2.45428
6.08294	4.46914	3.64566	2.76722
4.40041	2.91166	3.99425	3.05121
2.52266	1.20814	4.25889	3.33195
1.32098	0.73706	4.53512	3.64275
1.26196	1.63548	4.99736	4.02365
1.6539	2.07213	5.71235	4.52527
1.93018	2.02422	6.49326	5.1787
1.75646	1.63424	7.35308	5.92796
1.21036	1.12657	8.17917	6.6383
0.60647	0.84161	8.6206	7.18582
0.54243	0.9602	8.79107	7.46392
0.72431	1.16446	8.6536	7.36064
0.75571	1.22362	7.8971	6.79907
0.66336	1.16228	6.61554	5.70099
0.50718	1.10562	4.77329	3.98008
0.39709	1.09346	2.88125	2.07533
0.43046	1.09375	3.24376	2.96951
0.49563	1.09514	5.12928	5.69656
0.56438	1.12666	7.0462	8.04942
0.84991	1.20008	9.02292	9.65714
1.1735	1.28092	11.2779	10.7099
1.4621	1.33285	13.4518	11.542
1.55411	1.34071	14.9707	12.4536
1.50109	1.31713	15.8733	13.4664
1.46094	1.28629	16.4039	14.2057
1.38422	1.25583	16.653	14.41
1.21047	1.21942	16.8465	14.2356
0.91281	1.17821	17.271	13.9339
0.52331	1.1501	17.1874	13.573
0.56494	1.14962	16.5185	13.0642
0.49662	1.17512	16.0305	12.2909
0.28682	1.2233	14.95	11.15
0.30266	1.29349	12.8181	9.61292
0.58685	1.37798	10.2185	7.89477
0.78488	1.45978	8.17472	6.40887
0.8234	1.52367	7.6432	5.90242
0.81394	1.55983	7.69395	7.66836
0.8295	1.56003	9.522	11.7433
0.88793	1.51984	14.1119	17.0882
0.90141	1.43353	19.8088	22.8328
0.68669	1.309	24.9009	28.1914
0.38634	1.24233	27.7333	31.6105
0.85442	1.41901	27.3451	31.2355
1.57253	1.83453	24.4029	27.1265
2.26416	2.2931	19.9702	21.0923
2.83571	2.71438	15.1856	14.5093
3.3964	3.14458	10.7731	8.3338
4.00577	3.58156	6.92935	3.72997
4.45414	3.93811	3.92729	1.30357
4.67911	4.1267	1.90434	0.74982
4.77252	4.10496	1.0774	0.77187
4.68181	3.87604	1.45102	0.75224
4.27218	3.48888	1.66477	0.67491
3.66965	3.05867	1.63444	0.55056
3.08569	2.74497	1.63964	0.42922
2.52999	2.64233	1.2377	0.38882
2.00349	2.705	0.49667	0.43707
1.54438	2.83714	0.31736	0.50069
1.22181	2.9847	0.23852	0.53843
1.1595	3.12569	0.10688	0.5498
1.035	3.25296	0.24986	0.54155
0.81398	3.37367	0.13928	0.51902
0.80537	3.50136	0.22386	0.49197
0.99459	3.63703	0.29069	0.4664
1.15506	3.76925	0.30497	0.44219
1.19085	3.90907	0.40939	0.42426
1.1099	4.10531	0.28223	0.42479
0.893	4.40993	0.16879	0.45422
0.83651	4.83118	0.14566	0.50649
1.41053	5.31193	0.25345	0.55798
2.24429	5.72668	0.34471	0.58464
3.34362	5.93491	0.18864	0.57971
4.75479	5.9669	0.70404	0.55811
6.13565	6.10032	0.83541	0.54145
7.2151	6.53316	0.41961	0.53744
8.18839	7.12814	0.17876	0.53561
9.22789	7.63253	0.20365	0.52536
10.1662	7.92365	0.35922	0.51656
10.7815	8.01628	0.53467	0.53239
11.0616	7.948	0.63016	0.58155
11.0353	7.72037	0.63571	0.64771
10.7469	7.2896	0.52979	0.70524
10.2529	6.58534	0.59162	0.74111
9.48646	5.59051	0.75603	0.75821
8.50682	4.39989	0.87494	0.76426
7.53175	3.1882	0.82671	0.76426
6.626	2.11082	0.58042	0.75917
5.73947	1.36818	0.52697	0.75039
4.80305	1.60538	0.95316	0.74311
4.10304	2.71139	0.65485	0.74119
4.17829	4.15395	0.62887	0.74444
5.14133	6.0774	0.13802	0.75303
6.78066	9.08724	1.03133	0.76891
9.73272	13.5088	1.13684	0.78452
14.2355	18.7019	0.78976	0.78797
18.594	23.1418	1.26412	0.84346
20.4495	25.08	1.71498	1.0813
19.1407	23.5647	1.96395	1.48277
15.7963	19.0244	2.5642	1.94455
11.9766	12.9339	3.29926	2.44406
8.63031	7.14706	3.94835	3.03853
5.84258	3.17659	4.65713	3.7753
3.53391	1.38626	5.70991	4.64547
1.78456	0.90347	7.06265	5.6302
0.51804	1.19386	8.75899	6.75047
1.4278	1.69734	10.4213	8.04699
1.6451	2.04537	11.5836	9.45521
1.08027	2.2436	12.7794	10.7716
1.3886	2.39728	13.8092	11.7759
1.56452	2.55473	14.0571	12.2231
1.71253	2.69595	12.9936	11.7856
1.85401	2.7924	9.99927	10.1311
1.89874	2.82964	5.7645	6.93267
1.81847	2.80069	3.70111	2.14534
1.62088	2.7	7.447	4.65889
1.25159	2.54444	13.1339	11.2841
0.80658	2.37975	18.4731	17.1719
0.62209	2.27428	22.3758	21.581
1.02194	2.30781	25.0898	24.4698
1.54163	2.47981	27.0125	26.1524
1.96414	2.67569	28.1254	26.7143
2.16074	2.77345	28.155	26.0574
2.09859	2.73116	26.9206	24.2537
1.84907	2.60173	24.5708	21.5846
1.4347	2.48533	21.3142	18.4141
0.95722	2.4595	16.9553	14.9896
0.45907	2.53331	12.4952	11.4667
0.20836	2.67465	9.52859	8.4979
0.7298	2.85459	7.82839	7.54519
1.00069	3.03635	7.65402	9.67374
1.23026	3.15684	11.8433	15.2021
1.45332	3.13342	20.6185	24.3224
1.26826	2.91911	30.1075	35.0857
0.49822	2.6342	35.7869	43.5513
0.72929	2.67153	35.9067	46.4687
1.96661	3.21954	31.6358	42.574
3.041	3.83672	25.2237	32.6044
3.84944	4.16929	18.5968	19.8286
4.31948	4.25208	12.6432	8.82013
4.42636	4.23288	7.75016	2.3835
4.28859	4.18211	4.11524	1.51264
4.08499	4.09534	1.70313	1.71134
3.82981	3.96025	0.88347	1.22138
3.52115	3.85209	1.4391	0.68554
3.47908	3.88918	1.84809	0.68883
3.64407	4.08387	1.91816	1.2325
3.71109	4.32123	1.71134	1.84303
3.70695	4.49062	1.3248	2.12746
3.64677	4.56086	0.90141	1.87588
3.42293	4.55088	0.56076	1.34158
3.12369	4.49843	0.27101	0.93738
2.88186	4.43537	0.09939	0.7865
2.75335	4.38273	0.29253	0.76844
2.71575	4.3672	0.55827	0.80639
2.61092	4.4102	0.48227	0.87362
2.42076	4.51346	0.45678	0.93027
2.29347	4.64689	0.52071	0.93011
2.19155	4.76974	0.41445	0.8536
2.12695	4.87711	0.29161	0.73142
2.09323	4.99995	0.23381	0.61988
1.83309	5.17868	0.13783	0.5513
1.45927	5.44215	0.09885	0.51778
1.8951	5.78771	0.07878	0.49449
2.36301	6.15598	0.33282	0.46573
2.86028	6.45964	0.32413	0.43244
4.09216	6.67918	0.36103	0.40902
5.8132	6.91697	0.42669	0.41942
7.54552	7.36389	0.25667	0.47795
8.97329	8.04348	0.23631	0.56541
9.86732	8.60225	0.12213	0.64309
10.2809	8.69547	0.64043	0.69019
10.3898	8.3152	0.8962	0.71597
10.4369	7.69175	0.86065	0.7395
10.6123	7.15432	0.77388	0.76966
10.8732	6.92718	0.73333	0.79974
11.0754	6.92782	0.7247	0.81451
11.0715	6.85217	0.63844	0.80548
10.6897	6.416	0.5417	0.77618
10.0213	5.52189	0.50692	0.73764
9.27658	4.31332	0.56561	0.70729
8.50201	3.17321	0.5847	0.70154
7.76898	2.53564	0.54777	0.72226
7.06709	2.48293	0.55673	0.75782
6.41619	2.77468	0.65803	0.79578
5.93584	3.20692	0.63079	0.82709
5.62738	3.66795	0.46643	0.84485
5.5024	4.13959	0.2176	0.84989
5.51051	4.69476	0.12904	0.85122
5.64635	5.38421	0.32511	0.85568
5.83785	6.09974	0.23377	0.86765
5.83875	6.63285	0.21662	0.89543
5.73861	6.83124	0.34035	0.94441
5.64917	6.7206	0.31875	1.00369
5.80067	6.56941	0.28334	1.04955
6.48136	6.80714	0.28143	1.0692
8.05182	7.81483	0.25384	1.06961
10.6029	9.83754	0.29146	1.06563
13.3078	12.9715	0.44491	1.06892
15.9099	16.8828	0.54362	1.08368
18.4469	20.6908	0.67119	1.11707
20.2205	23.2796	0.87375	1.18933
20.7658	23.6934	1.12592	1.31612
20.4319	21.77	1.50378	1.4842
19.1943	18.4898	1.96008	1.67009
17.108	15.0811	2.37107	1.8881
14.4208	12.0894	2.78309	2.18551
11.2596	9.35048	3.2642	2.57911
7.7946	6.3677	3.83078	3.0338
4.45864	3.21647	4.52976	3.52212
1.94258	0.7991	5.36565	4.07391
0.82343	1.31211	6.20041	4.72037
0.8788	1.81407	7.03836	5.43736
1.11784	1.60877	7.93215	6.18962
1.22935	1.08116	8.70141	6.92386
1.14589	0.62499	9.16291	7.52864
1.0179	0.45832	9.43223	7.88128
0.83623	0.42957	9.42786	7.89007
0.49226	0.37967	8.92659	7.50118
0.29326	0.35423	8.18917	6.72487
0.22083	0.38444	7.46059	5.66064
0.31364	0.41089	6.7655	4.48941
0.46846	0.40123	5.94312	3.39275
0.41462	0.36796	4.92726	2.52195
0.21584	0.33824	4.1385	2.18011
0.08935	0.32389	4.12029	2.65639
0.2051	0.31839	4.72578	3.80899
0.25854	0.31643	5.87584	5.43473
0.19931	0.31673	7.89213	7.30456
0.12847	0.31904	10.4374	9.12361
0.27415	0.3212	12.4353	10.6238
0.33326	0.32051	13.3903	11.6643
0.2186	0.3177	13.8088	12.1642
0.04855	0.31661	13.9399	12.0474
0.15848	0.3209	13.791	11.4458
0.22918	0.33107	13.6149	10.6909
0.26235	0.34605	13.3643	10.0277
0.21931	0.36387	12.9759	9.5319
0.24968	0.3815	12.5563	9.13506
0.22578	0.39669	11.9936	8.66377
0.07458	0.40839	11.273	7.99438
0.10923	0.41667	10.5744	7.18805
0.18986	0.42133	10.0686	6.46451
0.30076	0.42077	9.81268	5.96784
0.3637	0.41309	9.41712	5.59597
0.35311	0.39905	8.66208	5.15837
0.30224	0.38555	7.87282	4.60673
0.12522	0.38268	7.11593	4.14326
0.16039	0.39462	6.49018	4.13453
0.17042	0.41777	6.077	4.82868
0.18731	0.44663	6.31603	6.07087
0.21636	0.47238	6.9127	7.56009
0.19335	0.48	7.52891	9.55949
0.11549	0.45838	9.69186	13.0036
0.17124	0.41212	14.4561	18.4186
0.30768	0.36522	20.9287	24.85
0.23782	0.34973	26.4327	30.2946
0.17402	0.41209	28.4499	32.8782
0.40895	0.59667	26.6051	31.2935
0.85065	0.87927	22.1876	25.2659
1.35236	1.26686	16.9566	16.6339
1.85001	1.74127	12.0389	8.62528
2.27093	2.16602	7.87713	3.35911
2.59883	2.3999	4.65057	1.22046
2.68295	2.38817	2.24445	1.12815
2.46896	2.16192	0.741	0.89443
2.21851	1.8336	1.07499	0.51972
2.092	1.56243	1.43529	0.38495
2.04841	1.45797	1.55263	0.39789
2.00237	1.50392	1.43393	0.37994
1.96099	1.62611	1.07022	0.36224
1.95394	1.77901	0.75402	0.3984
1.95923	1.93585	0.57484	0.48681
1.9549	2.07209	0.38185	0.57623
1.92787	2.17052	0.35615	0.62408
1.92921	2.23742	0.31491	0.62341
2.00472	2.30348	0.34384	0.5999
2.08383	2.39159	0.68605	0.58063
2.09374	2.49528	0.67681	0.57093
2.08499	2.59716	0.41215	0.56315
2.17377	2.69583	0.25205	0.54903
2.2436	2.80418	0.1601	0.52966
2.18937	2.92601	0.1525	0.51666
2.21295	3.04428	0.16964	0.5183
2.28134	3.13427	0.17708	0.52826
2.27307	3.18709	0.11939	0.52976
2.27349	3.21706	0.1939	0.5106
2.294	3.2477	0.15184	0.46958
2.3781	3.2945	0.11832	0.4135
2.45179	3.35747	0.15338	0.35759
2.42517	3.4352	0.29138	0.32102
2.26187	3.54309	0.40008	0.31286
1.99142	3.70866	0.15868	0.32686
1.66292	3.92906	0.40904	0.35171
1.53253	4.13367	0.53771	0.38244
2.04736	4.28213	0.28456	0.42147
3.41541	4.54115	0.13717	0.47124
5.37078	5.25805	0.17665	0.5253
7.4	6.47228	0.07604	0.56869
9.02075	7.72133	0.08232	0.58976
10.1661	8.5985	0.10816	0.58658
10.9863	9.01086	0.14598	0.56447
11.5583	9.02428	0.64206	0.53387
11.8704	8.78548	0.90936	0.50588
11.9	8.45982	0.76228	0.48583
11.7394	8.1124	0.62694	0.47271
11.4718	7.70057	0.19013	0.46359
10.945	7.15349	0.63275	0.4579
10.0861	6.42345	0.52578	0.45772
9.07072	5.46561	0.44203	0.46364
8.13897	4.26236	0.6873	0.47157
7.34837	3.01697	0.48231	0.47527
6.47022	2.33183	0.57737	0.4728
5.64472	2.63575	0.67098	0.46771
5.05474	3.38532	0.53411	0.46365
4.90523	4.21596	0.42489	0.46055
5.38338	5.12303	0.3588	0.45563
5.94791	6.10681	0.2966	0.44667
6.80307	7.20572	0.25727	0.43388
8.55681	8.79602	0.26581	0.41761
11.267	11.6681	0.32718	0.3971
14.9769	16.1242	0.29745	0.37484
18.7952	21.179	0.24045	0.36729
21.1724	25.0143	0.1658	0.40597
21.2045	25.8649	0.19921	0.49276
19.1979	23.092	0.32772	0.57412
16.2548	17.8405	0.4575	0.59158
13.4267	12.359	0.64996	0.56145
11.0424	8.56335	1.10156	0.62095
9.03429	6.62749	1.71242	0.87379
7.09178	5.09002	2.25902	1.27991
4.86832	3.17213	2.73475	1.75738
2.5999	1.19409	3.14222	2.21248
1.38367	0.68419	3.53771	2.61514
1.44525	1.54944	4.05723	3.02935
1.46993	1.81122	4.65446	3.54171
1.45938	1.61138	5.34557	4.17107
1.28884	1.2201	6.18396	4.8488
1.27399	0.87388	6.95057	5.47485
1.05106	0.69121	7.44256	5.97819
0.45706	0.59889	7.68742	6.34346
1.71171	0.51568	7.9881	6.5821
1.59672	0.46022	8.36082	6.6975
0.41974	0.46087	8.45727	6.70845
0.62824	0.48295	8.36087	6.66723
0.73774	0.47739	8.19638	6.60995
0.53828	0.43939	7.79607	6.48127
0.31862	0.39416	7.34473	6.10538
0.214	0.36715	6.96079	5.2561
0.26375	0.36425	6.13828	3.80902
0.27531	0.37331	4.7881	1.96859
0.19117	0.38011	3.85404	1.5566
0.11417	0.37418	4.16371	3.46534
0.09735	0.35561	5.37901	5.49981
0.27259	0.33433	6.701	7.31247
0.24172	0.31871	7.88986	8.76545
0.06666	0.31189	9.363	9.884
0.18409	0.31414	11.3806	10.9205
0.27687	0.32314	13.4396	12.1547
0.32867	0.33536	14.8636	13.5099
0.34828	0.35242	15.5494	14.4427
0.24858	0.38238	15.7489	14.5077
0.12705	0.42847	15.6911	13.7974
0.10702	0.48222	15.4116	12.7359
0.16567	0.5319	14.9652	11.7273
0.29528	0.57391	14.5119	10.9947
0.43082	0.61102	14.268	10.5397
0.53274	0.64234	14.0577	10.1867
0.57969	0.66176	13.397	9.67963
0.45648	0.66036	12.481	8.81069
0.33944	0.63377	11.4707	7.59048
0.32661	0.59155	9.90277	6.3224
0.31007	0.55145	8.11119	5.44314
0.29957	0.52612	6.94639	5.18666
0.29158	0.51893	6.62019	5.78739
0.26216	0.52718	6.53925	7.72993
0.32664	0.54539	7.53018	11.0299
0.35985	0.56695	11.2246	15.3373
0.36192	0.57964	16.6187	20.3803
0.40254	0.56357	21.3102	25.7331
0.28592	0.52683	23.7534	30.1077
0.20879	0.55625	24.1197	31.5099
0.56057	0.72569	22.8883	28.8895
0.89997	0.97397	20.2017	23.2447
1.27224	1.24537	16.6398	16.6559
1.8171	1.58286	12.8694	10.8966
2.32342	2.01463	9.38875	6.88606
2.61207	2.43591	6.26975	4.30469
2.78	2.7138	3.7252	2.36407
2.95258	2.7893	2.01066	0.89558
3.0934	2.6712	1.12704	0.3707
3.00607	2.41457	1.12158	0.72818
2.63094	2.1022	1.38801	0.87252
2.16873	1.80857	1.56329	0.84345
1.65204	1.55155	1.49042	0.71532
0.99052	1.35245	1.14304	0.538
0.44747	1.37064	0.6784	0.39973
0.76878	1.67622	0.41842	0.39274
1.11435	2.04955	0.2976	0.45084
1.28723	2.27695	0.09673	0.48363
1.26891	2.31247	0.16445	0.47871
1.06757	2.28313	0.21478	0.46483
1.0435	2.36372	0.23252	0.47851
1.35495	2.5916	0.20178	0.52736
1.74558	2.87268	0.06514	0.58433
2.10519	3.13943	0.23933	0.62571
2.46173	3.38896	0.17585	0.64978
2.8129	3.62127	0.2994	0.66428
3.11535	3.8133	0.87476	0.67162
3.4102	3.93662	1.0733	0.66326
3.63951	3.98256	0.6569	0.62791
3.7873	3.96848	0.21952	0.56801
3.80637	3.91856	0.07232	0.49761
3.63336	3.85056	0.14801	0.42457
3.40421	3.77719	0.27382	0.34857
3.12971	3.71987	0.2971	0.27311
2.66101	3.72779	0.26842	0.21138
2.02996	3.85485	0.49083	0.17973
1.39587	4.08989	0.73568	0.18788
1.3633	4.34621	0.60357	0.23188
2.3239	4.57901	0.58431	0.29383
3.93821	4.91417	0.32582	0.35718
5.98667	5.62625	0.38106	0.4116
8.15534	6.81719	0.60857	0.45164
10.1755	8.20846	0.41735	0.48033
11.7945	9.49016	0.33831	0.50489
12.9557	10.4814	0.13257	0.52704
13.6574	11.0227	0.26497	0.5403
13.9286	11.0668	0.59458	0.53668
13.9151	10.7058	0.79796	0.51829
13.6686	10.0333	0.45314	0.49778
13.1462	9.12245	0.14342	0.48633
12.3819	8.07174	0.48866	0.48701
11.439	6.99653	0.36351	0.49753
10.2945	5.98036	0.84962	0.51447
9.28103	5.08853	1.08635	0.53403
8.36933	4.48348	0.56046	0.55128
7.55361	4.33384	0.35889	0.55994
7.04854	4.54994	0.58893	0.55159
6.69338	4.99049	0.6519	0.51739
7.01739	6.03526	1.04438	0.45422
8.68108	8.70535	1.09127	0.373
12.2457	13.4448	0.75651	0.30683
17.4656	19.3226	0.42437	0.29844
22.6435	24.7113	0.54374	0.35809
25.4924	28.1183	0.85807	0.48045
25.0492	28.2856	1.17607	0.70585
21.9733	24.6023	1.49622	1.10058
17.8867	18.3692	2.10427	1.66744
14.5032	12.4958	2.98068	2.33504
12.1688	9.03523	3.8176	3.01718
10.1282	7.28587	4.66153	3.65426
8.03001	5.50396	5.4327	4.2211
5.82641	3.25357	5.99755	4.67777
3.36842	1.15192	6.2899	4.94836
1.79673	1.21634	6.23655	4.99255
1.75219	2.0647	6.13664	4.84509
1.59649	2.25093	6.2277	4.60365
1.71712	1.97647	6.3017	4.43035
1.7643	1.58977	6.2244	4.487
1.524	1.34754	6.15294	4.80483
1.28953	1.24741	6.28073	5.23653
1.18876	1.10878	6.29239	5.54628
1.07923	0.86562	5.85783	5.54023
0.81816	0.6102	5.16036	5.08773
0.47957	0.51445	4.26355	4.12079
0.24311	0.57425	3.02198	2.82778
0.20587	0.61605	2.15957	2.24135
0.1739	0.59053	2.94974	3.352
0.21078	0.52584	4.31254	4.87888
0.41669	0.46021	5.87258	6.15577
0.38795	0.42564	7.64643	7.16182
0.17506	0.43609	9.31023	8.00197
0.11424	0.48135	10.453	8.78094
0.22425	0.53826	11.0549	9.46327
0.37026	0.58999	11.3486	9.80953
0.49842	0.62981	11.4091	9.68614
0.52864	0.65207	11.3746	9.24125
0.46388	0.64755	11.2964	8.71348
0.34807	0.61257	11.1822	8.28383
0.2327	0.56434	11.1771	8.03654
0.15312	0.53074	11.1896	7.92114
0.16316	0.52437	10.8685	7.79299
0.26454	0.54259	10.2953	7.53413
0.11053	0.58101	9.84389	7.13342
0.18897	0.63357	9.34634	6.63706
0.27152	0.68781	8.51436	6.05545
0.35566	0.7348	7.50257	5.37239
0.43989	0.77427	6.65393	4.60674
0.37308	0.80384	5.87648	3.80928
0.22288	0.81966	4.52319	3.02254
0.08886	0.82944	2.76935	2.52728
0.29288	0.86027	2.40257	3.25248
0.49163	0.93201	3.9736	5.32238
0.6052	1.00963	5.99768	8.16138
0.66628	1.0296	8.73026	11.6795
0.6355	0.9568	12.9482	16.0623
0.51946	0.81254	18.0719	20.9631
0.45001	0.69263	22.4045	25.2059
0.52833	0.72439	24.069	27.426
0.76435	0.90251	22.5566	26.4199
0.96926	1.11048	18.9457	21.678
1.1838	1.35328	14.5485	14.5615
1.6567	1.72961	10.2981	7.79649
2.21921	2.18741	6.73943	3.23763
2.61353	2.56369	3.9017	1.15496
2.80511	2.75369	1.89244	0.84385
2.94998	2.76517	0.91204	0.68108
3.11787	2.69838	0.77649	0.47681
3.18851	2.66163	1.13167	0.39045
3.17536	2.68512	1.38257	0.34257
3.19591	2.72637	1.22841	0.30125
3.18854	2.74123	0.9523	0.25577
3.11558	2.72699	0.76653	0.22205
3.00057	2.71282	0.6281	0.26775
2.81888	2.73091	0.49773	0.36577
2.66159	2.79504	0.3281	0.45233
2.59732	2.90521	0.07649	0.51037
2.55825	3.05337	0.11639	0.55059
2.46517	3.21223	0.09595	0.5822
2.33585	3.34036	0.24721	0.59997
2.38487	3.40681	0.31301	0.5905
2.59505	3.41293	0.27283	0.54802
2.65724	3.38493	0.17844	0.48525
2.65303	3.34057	0.12487	0.42357
2.69564	3.29412	0.05554	0.37555
2.73494	3.27932	0.30781	0.34434
2.78108	3.32872	0.40533	0.33051
2.84165	3.44081	0.02807	0.3318
2.8755	3.58223	0.49575	0.34279
2.75134	3.728	0.5173	0.36091
2.40581	3.8944	0.28047	0.38984
2.01138	4.14268	0.17443	0.4318
1.3936	4.53991	0.19531	0.4771
1.36536	5.07607	0.32901	0.50737
2.21122	5.63584	0.18839	0.51258
2.5636	6.07514	0.14525	0.49938
3.06261	6.33366	0.14539	0.48123
4.14483	6.51049	0.08946	0.46538
5.68741	6.87043	0.14451	0.45057
7.36181	7.59311	0.41558	0.43419
8.90611	8.44639	1.0726	0.41966
10.1194	9.03555	0.90487	0.41604
10.7664	9.12327	0.43637	0.4309
10.7862	8.64984	0.21853	0.46498
10.4756	7.78449	0.3496	0.51081
10.1476	6.86689	0.41084	0.55341
9.90217	6.18019	0.4282	0.57645
9.78456	5.84243	0.44361	0.57324
9.71642	5.78409	0.41439	0.55112
9.53806	5.77156	0.31798	0.52256
9.20475	5.53193	0.45834	0.4935
8.74269	4.89374	0.60118	0.46223
7.99905	3.89376	0.46494	0.42762
7.08326	2.78636	0.31333	0.39609
6.2797	1.9779	0.35099	0.37861
5.60857	1.79046	0.51523	0.38222
5.1875	2.02515	0.45222	0.40634
4.94583	2.38208	0.29267	0.44391
4.6293	2.82687	0.21116	0.48377
4.25396	3.41217	0.09343	0.51534
4.20658	4.13429	0.08213	0.53375
4.65674	4.96674	0.08681	0.5393
5.38305	5.89758	0.25685	0.53162
6.46823	6.92796	0.33956	0.50684
8.08037	8.18044	0.28445	0.46037
10.3041	10.03	0.24451	0.39249
13.0109	12.9211	0.24989	0.31124
15.793	16.6995	0.28593	0.22586
18.3505	20.3996	0.36464	0.17803
19.976	22.8075	0.54945	0.32441
19.8504	22.9083	0.97515	0.64728
18.1901	20.3594	1.43112	1.05064
15.8386	16.0304	1.81085	1.45555
13.4862	11.8202	2.14902	1.81657
11.5206	9.45366	2.52504	2.10885
9.68038	8.46346	2.88672	2.30037
7.76104	7.05157	3.05128	2.3682
5.74288	4.74709	2.99404	2.30602
3.45123	2.20264	2.77481	2.11731
1.56943	0.35536	2.43506	1.84319
1.5674	1.21192	2.14385	1.56795
1.63212	1.64011	2.01993	1.40205
1.16806	1.51875	2.01576	1.46812
0.80361	1.13654	2.11891	1.76972
0.71178	0.77004	2.46609	2.18886
0.65946	0.61256	3.06942	2.6434
0.57416	0.59445	3.73624	3.13413
0.46326	0.56482	4.46128	3.68896
0.44599	0.49842	5.35525	4.31598
0.51348	0.44116	6.30067	5.02047
0.383	0.44073	7.12889	5.77225
0.20644	0.4807	7.81117	6.47417
0.29821	0.50836	8.38136	7.02506
0.11021	0.4902	8.79552	7.37038
0.3374	0.43539	8.98632	7.48523
0.48563	0.37879	9.00053	7.33334
0.44998	0.34004	8.67511	6.85792
0.58658	0.31793	7.83504	6.0155
0.43665	0.30702	6.50139	4.77822
0.23827	0.30253	4.95833	3.24253
0.16465	0.3001	4.01554	2.19513
0.16584	0.29606	4.24769	3.04444
0.14588	0.28771	5.47909	4.9411
0.12961	0.27473	7.27507	7.15922
0.04371	0.26105	9.86908	9.51486
0.2612	0.25291	12.9325	11.7927
0.15131	0.25455	15.3763	13.7321
0.2371	0.26777	16.7556	15.1794
0.34057	0.29219	17.1975	16.0301
0.40587	0.32275	17.0691	16.0675
0.32476	0.35022	16.6955	15.1858
0.12953	0.3709	16.1486	13.6817
0.13419	0.39092	15.3968	12.0875
0.12111	0.41587	14.5452	10.7879
0.03578	0.44353	13.9367	9.84166
0.22526	0.46893	13.2823	9.05163
0.44771	0.48968	12.0907	8.1787
0.46141	0.50463	10.7743	7.121
0.46167	0.5112	9.6282	5.92964
0.29892	0.50764	8.3097	4.6745
0.19515	0.49509	6.68793	3.51096
0.16514	0.47708	5.12643	3.3885
0.10185	0.45859	4.70249	5.16639
0.11031	0.44277	5.96153	7.85386
0.20947	0.42936	7.71453	10.7531
0.25982	0.41865	10.0141	13.9058
0.26202	0.41371	14.007	17.5617
0.32667	0.41021	18.9733	21.6638
0.35422	0.38373	23.0906	25.6674
0.20106	0.31044	25.1403	28.3027
0.4157	0.27557	24.742	28.1985
0.96437	0.58707	22.1244	25.3473
1.65341	1.20965	18.4003	20.7867
2.43719	2.00141	14.4878	15.263
3.18308	2.7743	10.8538	9.59508
3.5633	3.31047	7.5504	4.97849
3.60789	3.49512	4.63916	2.07305
3.61204	3.36917	2.53543	0.75097
3.58096	3.05891	1.28275	0.59413
3.43481	2.6985	0.88906	0.67853
3.11636	2.3703	1.2468	0.69376
2.66536	2.07335	1.4728	0.64815
2.19817	1.77095	1.47986	0.57656
1.67035	1.47674	1.25703	0.52071
1.02117	1.28993	0.73383	0.50959
0.48588	1.30787	0.37712	0.53108
0.65807	1.52594	0.42204	0.55158
1.12297	1.85335	0.35798	0.55343
1.351	2.14483	0.17899	0.53244
1.25284	2.29713	0.15464	0.49052
0.93947	2.30841	0.21955	0.43907
0.5391	2.26366	0.23887	0.3951
0.52131	2.30245	0.16658	0.36777
0.92626	2.51129	0.17949	0.35489
1.41968	2.85355	0.51478	0.3573
2.02114	3.24096	0.67704	0.38456
2.71975	3.59152	0.39434	0.43494
3.22158	3.85192	0.08602	0.48677
3.39102	4.01941	0.12932	0.5153
3.49079	4.12831	0.12764	0.51138
3.61421	4.20725	0.17409	0.48676
3.71024	4.2563	0.14717	0.46014
3.72906	4.25543	0.17225	0.43812
3.65067	4.19207	0.20854	0.41322
3.41602	4.08429	0.16886	0.37914
3.10334	3.97702	0.14456	0.34322
2.79838	3.91698	0.17351	0.32148
2.39778	3.92414	0.14149	0.32473
1.82801	3.99145	0.21984	0.35178
1.37206	4.11924	0.20265	0.39129
1.73456	4.34711	0.55751	0.42804
3.01932	4.73343	0.62022	0.45035
4.88418	5.3324	0.33301	0.45599
6.90359	6.27084	0.31791	0.45254
8.78107	7.5615	0.83982	0.44953
10.3267	8.8434	1.01478	0.44933
11.4238	9.69102	1.07239	0.4453
12.0267	9.9401	0.7925	0.42975
12.3156	9.70834	0.51965	0.40487
12.3906	9.30455	0.55363	0.38185
12.3148	8.98192	0.49592	0.37019
12.1935	8.71018	0.52194	0.37299
11.9143	8.2499	0.52512	0.38853
11.3218	7.39846	0.49169	0.41262
10.3413	6.16398	0.38423	0.44131
9.13072	4.74861	0.24349	0.472
7.94403	3.41927	0.26505	0.50022
6.91859	2.42015	0.40489	0.51874
6.21977	2.10517	0.35222	0.52307
5.54988	2.79869	0.3349	0.51485
5.03652	4.10025	0.36225	0.49814
5.71174	5.56154	0.14858	0.47471
7.08484	7.11236	0.02162	0.44231
8.72166	9.13684	0.08725	0.39835
10.981	12.1685	0.1516	0.34709
13.8271	16.1725	0.1941	0.29988
17.0037	20.2701	0.2193	0.27016
19.7853	23.1937	0.24053	0.27232
21.0062	23.9822	0.17035	0.31656
20.2825	22.2663	0.21463	0.3892
18.1783	18.4587	0.20996	0.45385
15.5282	14.1689	0.27922	0.49391
13.228	11.1952	0.7224	0.58165
11.5578	9.40277	1.35737	0.85597
9.96639	7.61431	2.00329	1.28453
8.07941	5.4867	2.44055	1.70955
5.87527	3.4556	2.60947	2.0363
3.7744	2.18853	2.76363	2.26235
2.1993	1.82132	3.05592	2.42628
1.45247	1.72442	3.46144	2.58041
1.5068	1.50052	3.84894	2.77816
1.52379	1.1216	4.19259	3.06354
1.4448	0.71439	4.72974	3.4596
1.45979	0.44837	5.5093	3.97352
1.15475	0.44365	6.27907	4.62164
0.543	0.53743	7.02019	5.39115
0.21376	0.59979	7.71701	6.18946
0.35252	0.62823	8.30317	6.87734
0.85451	0.6266	8.72331	7.33715
1.02322	0.59093	8.93805	7.51725
0.96398	0.52667	8.94072	7.41978
0.45467	0.46388	8.58297	7.06371
0.21887	0.43017	7.92646	6.47098
0.31619	0.41351	7.07888	5.6205
0.37063	0.39563	5.91925	4.43459
0.351	0.37604	4.63704	2.89118
0.25564	0.36062	4.08533	1.25023
0.16169	0.34887	4.78358	2.13587
0.15099	0.33492	6.06083	4.75148
0.28293	0.3205	7.53982	7.36252
0.21833	0.31441	9.16523	9.47447
0.19199	0.31959	11.1793	10.9571
0.23765	0.32852	13.3687	12.0334
0.24617	0.33427	14.9276	12.9824
0.22872	0.33964	15.5754	13.7204
0.21227	0.35278	15.627	13.9624
0.16899	0.37757	15.329	13.5841
0.16084	0.41047	14.8332	12.68
0.20882	0.44757	14.3524	11.5422
0.20878	0.4864	14.025	10.5031
0.18569	0.52025	13.7322	9.68533
0.19766	0.54145	13.0772	8.98558
0.28391	0.54779	12.0513	8.25515
0.28478	0.54346	10.9762	7.40417
0.20626	0.53733	9.91303	6.35358
0.12525	0.53603	8.6222	5.0482
0.14014	0.53622	7.13244	3.7737
0.16279	0.52619	6.0239	3.51052
0.18134	0.49956	6.01343	4.58665
0.2144	0.46598	6.49719	5.94793
0.22989	0.44345	6.84827	7.08814
0.26982	0.44459	7.16348	8.13237
0.32842	0.47471	7.84474	9.5113
0.37244	0.53634	9.90238	11.9616
0.52656	0.62695	13.7093	16.1843
0.73387	0.738	18.5789	21.9023
0.92106	0.87056	22.7288	27.3331
1.17362	1.05256	24.3566	29.9583
1.49235	1.32322	22.9969	28.2759
1.78635	1.67161	19.5545	22.7891
2.1627	2.03137	15.267	15.3991
2.63123	2.34615	11.0562	8.35752
2.96627	2.58051	7.48319	3.47772
3.09934	2.69904	4.59676	1.50994
3.06467	2.66262	2.3508	1.16094
2.84222	2.44881	0.97504	0.77995
2.50216	2.09888	0.9198	0.44755
2.06107	1.70563	1.33888	0.41493
1.49848	1.36948	1.51522	0.47178
0.96334	1.21949	1.43187	0.46557
0.59365	1.31597	1.14825	0.40824
0.42248	1.53022	0.79687	0.34557
0.4645	1.73325	0.47896	0.35042
0.57432	1.89503	0.30556	0.42599
0.51213	2.03606	0.2894	0.49825
0.34007	2.17477	0.24183	0.52979
0.42669	2.31792	0.14944	0.52589
0.83773	2.47726	0.09047	0.51055
1.35865	2.67973	0.01009	0.5005
1.8459	2.9435	0.10435	0.49514
2.23033	3.24335	0.18199	0.4877
2.52138	3.52295	0.17764	0.47399
2.7645	3.73586	0.14418	0.46057
3.07792	3.86779	0.15683	0.46086
3.30276	3.92654	0.11213	0.47524
3.21262	3.92683	0.11169	0.48466
2.99728	3.89236	0.08694	0.46841
2.75072	3.84791	0.06807	0.42617
2.63346	3.80772	0.16281	0.37557
2.63483	3.785	0.22557	0.33124
2.50906	3.80441	0.29849	0.29743
2.46895	3.89117	0.13983	0.27429
2.52026	4.03925	0.32509	0.26203
2.32812	4.20178	0.45639	0.2631
1.75495	4.33001	0.26412	0.28179
1.47166	4.47632	0.15735	0.31866
3.32896	4.85455	0.21062	0.36821
6.28294	5.77508	0.19712	0.42382
9.4793	7.57673	0.17425	0.47853
12.345	10.0719	0.15936	0.52469
14.321	12.3774	0.37061	0.55762
15.2999	13.7353	0.32964	0.57485
15.5862	13.9059	0.14319	0.57519
15.4002	13.0184	0.15237	0.56014
14.7739	11.4386	0.18084	0.53177
13.5844	9.55928	0.40919	0.49268
11.9682	7.62083	0.84174	0.45057
10.3468	5.71728	0.5992	0.41722
8.84832	3.88524	0.19654	0.40291
7.41803	2.39247	0.31734	0.41328
6.19631	2.00621	0.28455	0.44705
5.369	2.64155	0.8205	0.49517
5.08579	3.40511	0.7722	0.54324
5.08926	4.17856	0.21308	0.57404
5.26068	5.24843	0.65251	0.56911
6.34622	7.01363	1.28951	0.52121
8.86424	9.74148	1.48341	0.4523
12.6916	13.4747	1.20126	0.41716
17.1784	17.98	0.75846	0.48287
20.9153	22.3242	0.70886	0.68041
22.1404	25.0104	0.93558	1.00766
20.4438	24.9747	1.84985	1.43429
16.9562	21.9923	3.08364	1.90603
13.0004	16.6174	3.71517	2.40719
9.44851	10.4857	4.02114	2.95146
6.74528	5.75996	4.51128	3.51104
4.83392	3.38618	5.04791	4.0156
3.5393	2.33519	5.52377	4.41337
2.53648	1.60351	6.02903	4.71879
1.88587	1.28393	6.4511	4.99871
1.38634	1.44762	6.79283	5.33402
1.08097	1.6538	7.35831	5.79358
2.04274	1.6951	7.99327	6.37954
2.65256	1.59059	8.37852	6.98485
2.09801	1.44211	8.50319	7.41974
1.39163	1.35091	8.37136	7.45665
0.89379	1.31969	7.82982	6.88535
0.53239	1.26085	6.64248	5.59228
0.31126	1.14561	4.62019	3.66894
0.52024	1.09568	2.49463	1.72968
0.80552	1.21691	3.11068	2.35854
1.08669	1.40995	5.58323	4.76112
1.36118	1.54613	8.47125	7.30438
1.56311	1.59673	11.5759	9.67165
1.66168	1.59832	14.5245	11.908
1.62585	1.57673	16.7462	14.1237
1.58852	1.53053	18.3038	16.0487
1.59487	1.46369	19.437	17.2891
1.42326	1.39336	19.7378	17.6859
1.11531	1.33845	19.3585	17.2914
0.99375	1.30499	18.8926	16.275
0.82688	1.28754	18.0733	14.8233
0.55908	1.28195	16.4954	13.047
0.40493	1.28695	14.2107	10.9318
0.28624	1.30288	11.3526	8.4563
0.13197	1.33324	8.26355	5.89489
0.1583	1.38195	5.96882	3.8208
0.31922	1.44327	4.70685	3.11848
0.51121	1.50058	4.12084	4.73941
0.63506	1.53171	5.82535	8.14528
0.65162	1.51599	11.1929	12.8636
0.66126	1.45424	18.182	18.6929
0.63022	1.39022	24.0504	24.9408
0.48363	1.41586	26.7322	29.4833
0.75687	1.60729	25.9291	29.7738
1.51507	1.94614	22.8029	25.5955
2.14135	2.32668	18.5754	19.1152
2.48256	2.6344	13.9909	12.3963
2.66726	2.83466	9.69186	6.67841
2.79383	2.92884	6.11206	2.91666
2.81221	2.90376	3.36383	1.36149
2.66042	2.77486	1.53214	0.91323
2.46382	2.59028	0.84758	0.67144
2.2856	2.4174	1.15102	0.61421
2.12829	2.33333	1.41763	0.59016
2.10808	2.38619	1.40028	0.50348
2.14921	2.556	1.20492	0.41621
2.15956	2.75593	0.99236	0.40577
2.19417	2.89737	0.76768	0.44491
2.0424	2.95278	0.5812	0.48359
1.59635	2.98136	0.4656	0.51651
1.20428	3.09726	0.26096	0.55596
1.04083	3.34268	0.05423	0.60276
0.9298	3.63661	0.22085	0.64662
0.80334	3.88165	0.20752	0.67597
0.8139	4.04714	0.20066	0.68109
0.87719	4.14966	0.13904	0.66033
0.77119	4.19892	0.03408	0.6212
0.64143	4.1998	0.29036	0.57708
0.67107	4.18062	0.81015	0.54594
1.09409	4.1956	0.82476	0.53652
1.69878	4.29962	0.42157	0.53852
2.2804	4.49541	0.1714	0.53534
2.81901	4.72326	0.23375	0.52242
3.35616	4.92	0.28647	0.5142
3.7744	5.06797	0.23657	0.52732
3.98934	5.1868	0.18896	0.55965
4.03386	5.29091	0.21763	0.58861
3.92201	5.36634	0.25299	0.58849
3.69278	5.38818	0.25463	0.55622
3.12699	5.37536	0.24463	0.51322
2.5369	5.41237	0.26711	0.48304
2.01665	5.54852	0.5022	0.47752
1.96909	5.70582	0.35847	0.49386
3.11072	5.8065	0.34562	0.51686
5.20588	6.03994	0.73189	0.53119
7.13556	6.69872	0.84228	0.53614
8.56704	7.56045	0.7225	0.5482
9.42215	8.10218	0.70562	0.58603
9.76489	8.06729	0.80809	0.65282
10.0439	7.58831	0.71558	0.73175
10.421	7.11481	0.56266	0.79864
10.739	7.02918	0.65664	0.83923
11.0453	7.24866	0.67258	0.84841
11.2628	7.43441	0.60821	0.82739
11.2964	7.35803	0.405	0.79102
11.2382	6.96006	0.30681	0.76262
10.9724	6.27318	0.33817	0.75663
10.4059	5.44574	0.45199	0.7719
9.77766	4.71488	0.42495	0.80353
9.17748	4.2394	0.40455	0.85032
8.67597	4.01051	0.44237	0.90869
8.11477	3.89058	0.29351	0.97186
7.41798	3.79499	0.3732	1.03184
6.8823	3.81127	0.35249	1.08056
6.46363	4.09897	0.24318	1.11522
6.08876	4.76015	0.45052	1.1373
6.18749	5.77892	0.50045	1.14672
6.97622	7.04291	0.42493	1.14047
8.45084	8.58223	0.32049	1.11598
10.7467	10.9181	0.31703	1.07775
13.8689	14.6959	0.23087	1.03745
17.3992	19.696	0.11613	1.00668
20.9389	24.6942	0.23494	0.99244
24.0507	28.1584	0.50977	1.00304
25.6945	29.0524	0.91312	1.08008
25.2052	27.1362	1.46769	1.31734
23.2238	23.0839	2.11213	1.76923
20.533	18.6684	2.80363	2.37328
17.7303	15.291	3.60256	3.02179
14.9749	12.3071	4.49112	3.64114
11.9356	8.79032	5.25154	4.15475
8.4207	4.96888	5.61259	4.44702
4.77738	1.75081	5.52858	4.43747
2.15529	1.78437	5.17038	4.13147
2.61127	3.12991	4.70164	3.62479
3.76007	3.62253	4.27021	3.14144
3.99865	3.24679	4.16413	2.9907
3.26681	2.28339	4.64351	3.37528
2.06324	1.22267	5.46982	4.21967
1.17917	0.7638	6.30294	5.23717
1.02019	1.11318	6.97708	6.12802
1.45664	1.33785	7.33868	6.69043
1.64773	1.25108	7.46298	6.86774
1.23643	0.99527	7.5024	6.72625
0.81493	0.7333	7.46232	6.34964
0.49581	0.57709	7.15848	5.76615
0.29587	0.54542	6.27711	4.95626
0.51559	0.55813	4.93834	3.99203
0.24707	0.55936	3.79594	3.27914
0.16144	0.53807	3.71188	3.35909
0.25094	0.51007	4.61982	4.25599
0.19058	0.4935	6.47156	5.75593
0.09532	0.48987	9.06544	7.67006
0.22444	0.49631	11.3088	9.62648
0.44932	0.52289	12.6697	11.1181
0.47533	0.58947	13.4628	11.8273
0.40289	0.69446	13.8788	11.7534
0.48539	0.80338	13.8261	11.0884
0.56811	0.87486	13.454	10.1697
0.47692	0.88882	13.1487	9.38178
0.47532	0.85398	12.9651	8.92759
0.68895	0.7948	12.673	8.73534
0.85538	0.7369	12.1959	8.5486
0.6874	0.69744	11.6138	8.11251
0.47789	0.68238	11.1244	7.3637
0.3711	0.69144	10.7154	6.50648
0.3147	0.72068	10.1982	5.88749
0.22353	0.76277	9.67073	5.61638
0.20975	0.81043	9.02994	5.44125
0.24395	0.85915	8.24006	5.10231
0.20212	0.90447	7.53132	4.5648
0.16883	0.94117	6.77454	4.05148
0.1918	0.9688	5.75318	3.89135
0.19289	0.99238	5.06798	4.23889
0.13211	1.01672	5.22749	4.9813
0.12041	1.04124	5.63134	5.98887
0.13436	1.05903	6.25851	7.51418
0.22668	1.06133	7.9629	10.2739
0.32037	1.04223	11.5896	14.854
0.34882	1.00262	16.9307	20.894
0.36517	0.95669	23.0667	27.2082
0.44424	0.94163	27.9442	32.3182
0.75873	1.02235	29.4538	34.2811
1.24836	1.26265	27.2521	31.429
1.77829	1.68115	22.5885	24.4744
2.3116	2.22261	17.2289	16.2555
2.82648	2.77128	12.1174	9.07865
3.2994	3.20465	7.76619	3.85598
3.64113	3.41732	4.55444	1.09015
3.66405	3.35237	2.27195	0.98656
3.36928	3.03739	0.7126	0.86521
2.88351	2.57195	1.01933	0.50204
2.34309	2.0973	1.49433	0.33092
1.81843	1.75259	1.65557	0.30874
1.25732	1.63599	1.62149	0.25949
0.72796	1.78348	1.36252	0.25459
0.62155	2.11925	1.00721	0.36537
0.76151	2.49841	0.72327	0.50146
0.87091	2.80772	0.42893	0.59417
0.9612	3.01233	0.19481	0.62873
1.00121	3.13813	0.13035	0.62447
0.77153	3.22348	0.12302	0.60557
0.26298	3.29531	0.12695	0.58223
0.41964	3.36703	0.18405	0.55486
0.91799	3.44419	0.13984	0.52258
1.32313	3.52433	0.14662	0.48742
1.60984	3.59649	0.19411	0.45491
1.82283	3.66754	0.15644	0.43588
2.11893	3.77511	0.11277	0.44631
2.44131	3.94895	0.12258	0.49017
2.70252	4.16638	0.10952	0.54649
2.91087	4.36358	0.10024	0.58354
3.07638	4.48972	0.16019	0.5849
3.21988	4.53321	0.15212	0.56117
3.306	4.51401	0.09787	0.53489
3.3242	4.4741	0.13628	0.51845
3.31505	4.4569	0.21971	0.50684
3.20851	4.48013	0.16858	0.48805
3.1079	4.53596	0.14028	0.46089
3.0051	4.62149	0.24276	0.4381
2.73657	4.76003	0.28062	0.4319
2.41865	4.98751	0.14342	0.44395
2.09789	5.30804	0.35991	0.46746
1.84602	5.67217	0.62013	0.49314
1.84778	6.02462	0.40673	0.51434
2.14559	6.33691	0.09805	0.52986
2.96686	6.60763	0.16315	0.54222
4.7437	6.88734	0.16344	0.55277
7.23065	7.30766	0.08534	0.5578
9.49541	8.07089	0.26451	0.54819
10.9645	9.11286	0.69474	0.51743
11.7164	9.89072	0.93338	0.47335
12.0165	9.9824	0.74637	0.43433
12.0381	9.46003	0.56656	0.41163
11.9847	8.66402	0.457	0.4029
11.9419	7.98139	0.45274	0.40157
11.8363	7.60102	0.33618	0.40701
11.7682	7.36166	0.23575	0.42517
11.4041	6.96759	0.41383	0.4598
10.4165	6.23737	0.32083	0.5042
9.37282	5.20742	0.29758	0.54456
8.57182	4.09146	0.35316	0.57097
7.78788	3.14768	0.31407	0.581
7.05295	2.5807	0.34622	0.57615
6.56626	2.52276	0.46625	0.56014
6.35338	3.00805	0.34023	0.53731
6.21615	3.8972	0.18799	0.51074
6.55899	4.93578	0.23084	0.48401
7.11084	5.91071	0.29856	0.46174
7.35001	6.80412	0.33443	0.4468
8.07402	7.89505	0.17264	0.43974
9.66215	9.86373	0.19752	0.43935
12.184	13.4082	0.28589	0.44126
15.56	18.2883	0.28468	0.43988
19.0766	23.143	0.25119	0.43673
21.8904	26.2391	0.23026	0.44512
23.0694	26.4797	0.22987	0.47366
22.1736	23.8427	0.33344	0.50143
19.9997	19.2967	0.49059	0.50586
17.317	14.6682	0.77019	0.57645
14.2652	11.3304	1.27943	0.88885
10.9974	8.69867	1.93522	1.40579
7.75676	5.88588	2.46283	1.95995
4.97411	3.08987	2.86344	2.40599
2.89411	0.89388	3.23829	2.70842
1.51584	0.63202	3.55783	2.94127
0.84224	1.14796	3.9963	3.19344
0.70426	1.13958	4.65536	3.51692
0.76135	0.86692	5.31997	3.92792
0.79113	0.58182	5.86683	4.41223
0.70013	0.46105	6.39956	4.93655
0.54448	0.46476	6.96935	5.46962
0.40176	0.46722	7.64776	6.00998
1.08687	0.43255	8.33256	6.56416
0.31094	0.37815	8.85776	7.11107
1.04312	0.34024	9.33397	7.62048
1.35395	0.33448	9.7846	8.07349
0.88682	0.3453	10.078	8.43815
0.22927	0.35577	10.0352	8.6001
0.40389	0.36592	9.55566	8.31713
0.62461	0.3767	8.63479	7.30607
0.48329	0.38433	7.17093	5.42638
0.26524	0.39291	5.43023	2.89256
0.18418	0.40426	4.44223	1.42681
0.20735	0.4086	4.87475	3.56708
0.34254	0.39406	6.20427	5.91407
0.53534	0.3578	7.96417	7.98496
0.30558	0.31289	10.2081	9.80127
0.19255	0.28124	13.1391	11.5395
0.27755	0.27314	16.1071	13.4416
0.2869	0.27812	18.0696	15.4656
0.30904	0.28537	18.865	17.1139
0.32157	0.3015	18.8292	17.6702
0.24412	0.33835	18.1321	16.7842
0.11652	0.39089	17.095	14.8492
0.12168	0.43948	15.9477	12.6842
0.19764	0.46929	14.8145	10.9113
0.18939	0.47681	13.8217	9.61101
0.15859	0.46521	12.8273	8.43322
0.2431	0.44294	11.7277	7.03157
0.35199	0.41863	10.4902	5.4689
0.25523	0.39422	9.15436	4.30951
0.07168	0.36916	7.88372	4.00927
0.07919	0.34686	6.68958	4.23697
0.12404	0.33361	5.29183	4.47816
0.12303	0.33304	4.12571	4.5519
0.07701	0.34545	4.33447	4.91903
0.08912	0.36951	5.60489	6.7075
0.20068	0.39896	7.76367	10.2525
0.31461	0.42104	11.2989	15.0113
0.35916	0.42083	16.0927	20.5085
0.35812	0.40236	21.2685	26.2739
0.34332	0.43782	25.0395	31.0735
0.49976	0.61772	25.6593	32.9036
0.80547	0.86775	23.2305	30.4593
0.98802	1.04649	19.2292	24.2631
1.00427	1.10531	14.7637	16.2362
1.02238	1.1095	10.5955	8.70845
1.07065	1.11988	6.98971	3.58185
1.09482	1.12532	3.91367	1.61193
1.10692	1.10218	1.78141	1.24843
1.1453	1.06156	0.7448	0.85324
1.20137	1.06277	0.90019	0.57653
1.34097	1.16354	1.4876	0.5363
1.50846	1.34647	1.68163	0.52357
1.63582	1.5497	1.50887	0.4645
1.85576	1.73717	1.15284	0.3922
2.10223	1.90258	0.7441	0.34738
2.2858	2.04244	0.44755	0.3607
2.43729	2.15127	0.28179	0.41291
2.51428	2.22624	0.14362	0.45676
2.49624	2.26557	0.10787	0.4706
2.45221	2.26828	0.14781	0.45988
2.434	2.24572	0.15317	0.44559
2.3951	2.22094	0.14044	0.446
2.22902	2.19464	0.12757	0.4576
1.96654	2.16313	0.09734	0.46011
1.75765	2.17487	0.11439	0.44278
1.72583	2.28786	0.19446	0.41955
1.83828	2.48902	0.20275	0.41348
2.00565	2.71946	0.19313	0.42954
2.18376	2.94658	0.27346	0.45037
2.3567	3.16753	0.25339	0.45696
2.56259	3.37077	0.50859	0.44679
2.81251	3.52921	0.55125	0.42964
2.97982	3.61822	0.28066	0.41304
2.99146	3.63312	0.16837	0.39805
2.9547	3.59715	0.22029	0.38318
2.79664	3.55788	0.1667	0.37028
2.46688	3.57159	0.15791	0.36666
2.19704	3.67506	0.29588	0.37928
1.97114	3.88409	0.40629	0.40646
1.64205	4.2032	0.19174	0.43655
1.30138	4.60318	0.24587	0.458
1.45574	5.00454	0.23828	0.46649
2.40625	5.33679	0.12138	0.4634
4.05777	5.71609	0.25835	0.45358
6.15137	6.51741	0.14416	0.44181
8.59246	7.97131	0.41363	0.42965
10.8878	9.71716	0.60122	0.41689
12.3747	11.058	0.3978	0.40559
13.0866	11.5706	0.28053	0.40244
13.378	11.3215	0.17825	0.4167
13.4685	10.635	0.51764	0.45259
13.4224	9.85298	0.41108	0.50139
13.2186	9.17137	0.50616	0.54529
12.7602	8.55569	1.01468	0.57204
12.0473	7.85304	0.83105	0.58102
11.18	6.97758	0.43844	0.57732
10.194	6.00115	0.41302	0.56526
9.22167	5.07513	0.43793	0.545
8.42245	4.33452	0.52329	0.51355
7.41074	3.97872	0.51457	0.47029
6.3523	4.24865	0.81313	0.42001
6.12635	5.28303	0.65486	0.37075
6.94226	7.46538	0.36229	0.33042
10.0114	11.5014	0.32786	0.30747
15.5192	17.408	0.37293	0.31666
20.7949	23.9194	0.6935	0.38532
23.6241	28.888	0.88479	0.54036
23.6419	30.1604	0.98567	0.76246
21.1561	26.9031	0.88859	0.97647
17.1202	20.3899	0.88155	1.1105
13.0129	13.1069	1.62967	1.22968
9.66919	7.27806	2.68026	1.61412
7.0866	4.07643	3.41446	2.27735
4.8965	2.66922	3.69993	2.85212
2.9062	1.41635	3.81869	3.1223
1.25108	0.31589	3.99264	3.16426
0.90485	1.17094	4.23165	3.18456
2.24091	1.82318	4.64979	3.36068
2.43363	1.9712	5.33088	3.77512
1.33172	1.70418	6.23991	4.45598
0.39841	1.22902	7.2904	5.38407
0.2954	0.92026	8.23487	6.4259
0.73372	1.06746	8.84552	7.34221
1.1118	1.34424	9.10956	7.88372
1.27672	1.4825	9.00733	7.9032
1.31983	1.43992	8.45089	7.38582
1.20058	1.30695	7.52442	6.39903
1.01517	1.16352	6.27822	5.04855
0.87281	0.99412	4.4686	3.41374
0.55136	0.86747	2.59169	1.68937
0.66439	0.95475	3.15118	1.78632
1.10125	1.2035	5.27405	3.83967
1.41696	1.41882	7.62386	6.14046
1.55756	1.50796	10.3846	8.56013
1.58291	1.48211	13.1915	11.0321
1.60021	1.39282	15.2639	13.2889
1.62516	1.29179	16.4396	14.8769
1.57376	1.21168	17.1658	15.5082
1.38425	1.15142	17.6004	15.2912
1.16763	1.08238	17.344	14.5388
1.0064	0.97944	16.6484	13.5573
0.83998	0.85185	15.8582	12.5344
0.49561	0.74114	14.7008	11.4815
0.12425	0.7006	13.1038	10.3095
0.31236	0.76539	11.1834	8.90481
0.53803	0.90508	9.06867	7.18584
0.77501	1.05303	6.94057	5.31982
0.91805	1.16239	5.00747	3.89307
1.00056	1.21662	3.74455	3.57214
0.94385	1.2185	3.69459	4.23955
0.75459	1.1787	4.30988	5.93351
0.64265	1.11149	6.60742	9.70437
0.57767	1.02407	11.7683	15.939
0.43905	0.91801	18.543	23.2211
0.26833	0.82043	23.6328	29.1958
0.21301	0.81733	24.9148	32.2183
0.57263	0.96819	23.0081	31.7809
0.91565	1.18402	19.2381	27.774
1.26728	1.4021	14.8046	20.6176
1.66964	1.65182	10.5087	12.1742
2.06599	1.91064	6.7877	5.13587
2.29861	2.09739	3.93245	1.14661
2.26726	2.16745	2.03686	1.02158
2.20024	2.14699	0.78344	1.12475
2.33818	2.12005	0.87654	0.80921
2.53153	2.16013	1.38447	0.53628
2.55797	2.24173	1.38153	0.38933
2.45588	2.24603	1.26767	0.30054
2.22357	2.08192	1.19526	0.27114
1.74596	1.79142	0.97484	0.30381
1.14427	1.55346	0.63886	0.35129
0.66484	1.55837	0.43257	0.38447
0.60279	1.77205	0.30987	0.41093
0.87098	2.03327	0.24853	0.44403
1.07618	2.2624	0.11434	0.48401
1.10789	2.44606	0.16242	0.52686
0.93215	2.59826	0.20161	0.57285
0.75764	2.72464	0.24967	0.61595
0.86597	2.82919	0.19009	0.64003
1.15091	2.93832	0.18727	0.64275
1.41904	3.06231	0.2922	0.64222
1.70686	3.18389	0.33784	0.65257
2.10491	3.30006	0.72174	0.6681
2.57442	3.43871	0.81001	0.66912
3.03175	3.63099	0.46626	0.64019
3.46149	3.8763	0.20047	0.58401
3.79673	4.14543	0.12743	0.51964
4.05407	4.40053	0.1467	0.47239
4.31688	4.59798	0.25348	0.46147
4.47339	4.6998	0.25769	0.48715
4.52808	4.71106	0.22246	0.52837
4.62302	4.69555	0.17115	0.55753
4.70215	4.71968	0.10897	0.5617
4.71828	4.76983	0.07391	0.54648
4.54608	4.73632	0.0842	0.52264
3.98511	4.5047	0.1271	0.49597
3.01448	4.13674	0.13392	0.4652
2.10629	4.06846	0.37248	0.42976
3.16495	4.7908	0.67015	0.4023
5.93775	6.14761	1.01907	0.40147
8.8095	7.84089	1.06678	0.42801
11.0765	9.60385	0.64007	0.46532
12.6025	10.9234	0.46091	0.50189
13.522	11.4708	0.36252	0.53713
14.1005	11.3946	0.41479	0.57211
14.5177	11.0888	0.5352	0.6049
14.8241	10.9167	0.40564	0.6328
15.0119	10.9538	0.37114	0.65495
14.9833	10.9536	0.41986	0.67224
14.6619	10.5892	0.49692	0.68768
13.9534	9.64565	0.55751	0.71064
12.8383	8.13156	0.77296	0.7511
11.5293	6.31978	1.13265	0.80187
10.2209	4.71044	1.30126	0.84121
8.86042	3.84064	1.06725	0.85246
7.59577	3.87465	0.81343	0.83564
6.85623	4.49752	0.7748	0.8081
6.48252	5.35238	0.63977	0.79002
6.22458	6.31717	0.37773	0.78448
6.66331	7.71519	0.21014	0.7769
8.90211	10.5661	0.21767	0.75452
13.2927	15.8211	0.25335	0.71879
18.8825	22.9408	0.29905	0.67932
24.0461	29.7548	0.38876	0.65607
27.0951	33.5244	0.51759	0.69935
26.924	32.6343	0.71709	0.85844
24.227	27.4693	0.91412	1.09758
20.4126	20.0029	1.20568	1.33677
16.3232	13.1424	1.66222	1.57571
12.7782	9.19527	2.26098	1.92138
10.0008	7.20909	3.05291	2.45954
7.52433	5.1342	3.8876	3.12503
5.23434	2.80685	4.64406	3.7751
3.25663	0.89977	5.35325	4.34144
1.76497	0.80553	6.08034	4.84511
1.55887	1.33679	6.89204	5.33229
2.30312	1.4061	7.6746	5.84509
2.09099	1.1528	8.32617	6.37685
1.21917	0.77105	8.8471	6.85347
1.06624	0.4661	9.17424	7.20349
1.15466	0.36461	9.37187	7.41403
0.81832	0.36725	9.58334	7.51801
0.36095	0.35418	9.71936	7.54892
0.13546	0.3454	9.6644	7.48931
0.3314	0.37596	9.44829	7.23867
0.56222	0.41516	8.79741	6.6209
0.4156	0.43275	7.34719	5.48832
0.30523	0.42826	5.42602	3.88765
0.27103	0.41615	3.94983	2.20554
0.26599	0.40348	4.02116	2.34036
0.22217	0.38763	5.43054	4.64509
0.14612	0.37406	6.9887	7.12235
0.14689	0.36862	8.64075	9.1799
0.33667	0.36685	11.0633	10.8223
0.27039	0.36411	13.8913	12.3237
0.05469	0.36258	15.9057	13.7756
0.06092	0.37084	16.77	14.85
0.09445	0.39657	16.9139	15.2012
0.12578	0.43533	16.5867	14.7678
0.21646	0.47212	16.1176	13.7118
0.26926	0.49726	15.8336	12.4085
0.24432	0.51415	15.62	11.2946
0.20503	0.5317	15.1518	10.5472
0.22665	0.55391	14.3459	9.98764
0.26153	0.57633	13.5072	9.30982
0.29765	0.59021	12.753	8.38083
0.3967	0.58649	11.8618	7.27741
0.44394	0.56089	10.8494	6.14877
0.37965	0.52394	9.832	5.2185
0.27832	0.49974	8.73364	4.68962
0.16175	0.50793	7.34353	4.51838
0.10893	0.54635	5.91238	4.5861
0.13847	0.5948	5.48255	5.10668
0.21467	0.6343	6.39709	6.61945
0.30654	0.64976	8.3706	9.67796
0.33532	0.62881	12.4049	14.977
0.34516	0.57375	19.2525	22.8667
0.42122	0.52069	26.5472	32.2327
0.56005	0.55517	30.8319	40.0363
0.7777	0.74383	30.6632	42.4823
1.12008	1.04646	27.0883	37.7351
1.39293	1.34611	21.7975	27.6073
1.57863	1.54424	16.0849	16.1306
1.7215	1.66297	10.9062	6.8224
1.8472	1.75201	6.64338	1.61012
1.9724	1.78996	3.44505	1.68477
2.01747	1.77109	1.38784	1.6689
1.99198	1.73931	0.7978	1.1122
2.00032	1.73895	1.45637	0.80953
2.04936	1.77604	1.72202	0.73857
2.04298	1.82065	1.57354	0.61869
1.93168	1.83187	1.388	0.46783
1.73204	1.78915	1.22443	0.38665
1.48876	1.72005	0.94484	0.38592
1.1748	1.67479	0.64113	0.4151
0.82414	1.68474	0.42202	0.44972
0.58508	1.75983	0.19567	0.48061
0.46612	1.88553	0.04124	0.49581
0.42229	2.0351	0.09245	0.48953
0.44726	2.19768	0.06485	0.47488
0.40224	2.37733	0.08076	0.47574
0.29964	2.56516	0.12494	0.50376
0.41996	2.73255	0.09687	0.54361
0.62885	2.86449	0.11495	0.56889
0.82428	2.97701	0.22448	0.57353
1.11403	3.09582	0.2623	0.57289
1.4842	3.22805	0.20381	0.57543
1.83547	3.35796	0.16358	0.56869
2.1773	3.47168	0.13558	0.53708
2.52051	3.57674	0.07618	0.48733
2.82225	3.69681	0.05564	0.44332
3.0254	3.85044	0.13953	0.42052
3.18806	4.03084	0.16155	0.41887
3.39538	4.20454	0.22365	0.42881
3.52437	4.33295	0.03208	0.44115
3.50037	4.40352	0.20291	0.45539
3.54708	4.43393	0.11041	0.47561
3.73162	4.4463	0.19655	0.5008
3.83356	4.45464	0.29485	0.52361
3.83486	4.46535	0.24734	0.53685
3.82108	4.47616	0.51646	0.53673
3.94221	4.48215	0.6895	0.52271
3.76422	4.48953	0.40936	0.49879
3.07295	4.52568	0.08995	0.47185
2.70669	4.64041	0.25705	0.44746
2.40795	4.91166	0.22187	0.42996
2.17791	5.39262	0.20049	0.42399
2.46198	6.00554	0.27036	0.43462
3.48573	6.59647	0.51841	0.46625
5.39461	7.13537	0.72519	0.51686
7.59917	7.83749	0.75205	0.57152
9.48331	8.87112	0.4383	0.60849
10.8532	9.92114	0.32852	0.617
11.5826	10.4738	0.23522	0.60504
11.695	10.251	0.32383	0.58814
11.2581	9.27703	0.34555	0.57463
10.5958	7.87624	0.44219	0.56349
10.1856	6.55475	0.44919	0.55192
10.0221	5.69854	0.24451	0.54077
9.9295	5.33564	0.25224	0.53277
9.8177	5.23463	0.26968	0.53114
9.60868	5.14073	0.26177	0.5408
9.18881	4.85372	0.49192	0.56419
8.52951	4.28189	0.61013	0.59355
7.82852	3.44812	0.47443	0.61351
7.20438	2.53178	0.22769	0.61503
6.68201	2.1585	0.1263	0.6031
6.26264	2.75593	0.17281	0.5892
6.02839	3.60733	0.16446	0.57987
6.09049	4.22673	0.12758	0.57407
5.90337	4.56655	0.32875	0.56847
5.43343	4.75993	0.18013	0.56185
5.19473	4.95778	0.34606	0.55439
5.20191	5.25013	0.33124	0.5471
5.37879	5.66526	0.29184	0.54349
5.82606	6.19776	0.25895	0.54812
6.47693	6.82875	0.19177	0.56074
7.63722	7.6033	0.25328	0.5753
9.56673	8.74647	0.30761	0.588
11.7812	10.6312	0.38762	0.60281
13.8977	13.4738	0.49611	0.62771
15.8925	16.8437	0.54767	0.66711
17.5787	19.7795	0.68301	0.71817
18.7109	21.5002	0.85949	0.77325
19.0299	21.5745	0.92818	0.82013
18.544	19.9021	0.92105	0.84578
17.72	17.06	0.95384	0.85395
16.511	14.283	1.07746	0.87846
14.5561	12.5193	1.24847	0.96949
11.9579	11.1449	1.45839	1.15236
9.08471	8.89536	1.79426	1.4102
6.30279	5.72348	2.22132	1.71053
3.79673	2.5953	2.53196	2.00485
1.91667	0.48922	2.72617	2.23017
0.98324	0.95747	2.87133	2.35165
0.86418	1.20159	2.91129	2.3748
0.95889	0.96228	2.83494	2.32769
0.90797	0.5866	2.67157	2.25209
0.83504	0.29941	2.51551	2.18405
0.91045	0.17758	2.50542	2.14978
0.86926	0.14603	2.63242	2.18088
0.556	0.14471	2.71406	2.29138
0.31983	0.16426	2.75604	2.44727
0.29764	0.18466	2.82145	2.59448
0.21061	0.21031	2.78494	2.71094
0.14004	0.24826	2.66066	2.81538
0.15994	0.29042	2.62325	2.93662
0.14493	0.32189	2.86632	3.09688
0.08523	0.3358	3.34483	3.32429
0.13166	0.33647	3.87743	3.6516
0.10327	0.33006	4.42833	4.07216
0.11031	0.31791	5.02251	4.53541
0.14969	0.29857	5.7021	5.02185
0.06378	0.27435	6.46928	5.55068
0.13867	0.25186	7.152	6.09498
0.2078	0.23542	7.64029	6.53084
0.32146	0.22409	7.85507	6.66622
0.18544	0.21532	7.57278	6.33547
0.27031	0.20921	6.70438	5.51068
0.56357	0.20749	5.54676	4.42313
0.22807	0.21067	4.52897	3.67878
0.30276	0.21889	3.91124	3.87274
0.38996	0.23163	4.04383	4.8079
0.27331	0.24511	4.73587	5.97105
0.22405	0.25291	5.50189	7.03879
0.14117	0.25187	6.45286	7.96257
0.07889	0.2453	8.13049	8.95315
0.13215	0.23979	10.2351	10.2515
0.24521	0.24176	11.9866	11.7549
0.28748	0.25457	13.2388	12.9294
0.22263	0.27654	13.9014	13.283
0.08981	0.30338	13.8338	12.7032
0.16255	0.33234	13.2583	11.3942
0.39504	0.36143	12.5354	9.78319
0.34485	0.38633	11.8068	8.34895
0.16193	0.40198	11.1164	7.3543
0.11907	0.4056	10.6124	6.79342
0.13635	0.39753	10.3347	6.49628
0.15804	0.38068	10.057	6.22737
0.15364	0.35893	9.57044	5.81404
0.12751	0.3369	9.12379	5.27975
0.10271	0.31966	8.81805	4.85179
0.19686	0.31046	8.54955	4.66265
0.31667	0.31008	8.25998	4.59562
0.14204	0.31799	7.95498	4.54688
0.06908	0.33426	7.53946	4.50753
0.06385	0.35951	6.90606	4.52737
0.03698	0.39235	6.11866	4.73974
0.11416	0.42608	5.84321	5.30067
0.04817	0.4502	6.19708	6.22487
0.04222	0.45726	6.54422	7.42456
0.03434	0.4446	7.2057	9.06188
0.07045	0.41122	8.92568	11.5955
0.0762	0.35929	11.7929	15.2846
0.07193	0.29898	15.6272	19.7567
0.17379	0.24964	20.2013	24.1629
0.24704	0.2404	24.2544	27.4803
0.27949	0.31408	25.7055	28.3877
0.42412	0.48392	23.9281	25.8075
0.68454	0.72303	20.1296	20.3383
0.93638	0.98779	15.6593	14.0007
1.22358	1.22055	11.2453	8.37661
1.52579	1.37193	7.38744	4.14132
1.60196	1.39539	4.35113	1.69153
1.3418	1.25477	2.14538	0.89381
1.01602	1.00564	0.77921	0.57452
0.79013	0.79747	0.65662	0.37926
0.79263	0.74775	1.20234	0.43962
0.97025	0.8663	1.43087	0.48171
1.21	1.09783	1.32596	0.44585
1.46561	1.36601	1.16928	0.398
1.57988	1.58852	1.01751	0.41011
1.62907	1.71744	0.69383	0.48281
1.70764	1.75659	0.32178	0.55487
1.72963	1.73623	0.21012	0.58834
1.61647	1.69348	0.14669	0.58947
1.47346	1.66134	0.13911	0.58257
1.40225	1.65931	0.28906	0.58223
1.35158	1.68634	0.25873	0.58265
1.24501	1.7195	0.15326	0.56765
1.03495	1.74113	0.14771	0.53028
0.86409	1.75999	0.15478	0.47743
0.83864	1.7996	0.05966	0.42248
0.92617	1.87759	0.13285	0.38358
1.04085	1.98951	0.15172	0.37289
1.08841	2.11769	0.18876	0.38292
1.10228	2.25537	0.07411	0.39724
1.20095	2.41402	0.17483	0.40824
1.32524	2.60295	0.15431	0.42094
1.3765	2.80718	0.16221	0.44404
1.4539	2.99716	0.17914	0.47948
1.54548	3.15409	0.12994	0.51845
1.59537	3.28243	0.08389	0.54777
1.6979	3.39819	0.14117	0.56221
1.91505	3.50876	0.20106	0.56602
2.11777	3.60912	0.21931	0.56284
2.2134	3.69303	0.13277	0.54931
2.33751	3.7638	0.08904	0.52041
2.50158	3.83054	0.12507	0.47981
2.64458	3.89867	0.18246	0.43992
2.78282	3.97167	0.23395	0.41243
2.8562	4.05735	0.19997	0.40425
2.78244	4.16923	0.4428	0.41742
2.61045	4.31514	0.71695	0.44689
2.57772	4.48113	0.43935	0.47992
2.62234	4.643	0.07461	0.50301
2.57197	4.79468	0.14956	0.51257
2.39453	4.95737	0.20108	0.5142
1.95587	5.16187	0.21267	0.51198
1.89302	5.42563	0.18865	0.50341
1.68254	5.73498	0.19703	0.48513
1.35567	6.03955	0.22978	0.46182
1.52584	6.29592	0.06858	0.44505
2.68573	6.55202	0.23119	0.4435
4.63693	7.00904	0.71242	0.45784
7.01997	7.82017	1.01351	0.48321
9.17521	8.76222	0.73363	0.51415
10.6282	9.47376	0.38931	0.54531
11.4069	9.74568	0.22367	0.57114
11.8229	9.51038	0.38128	0.58865
12.1662	8.96684	0.28404	0.59792
12.5072	8.51742	0.41147	0.59904
12.8622	8.3791	0.63446	0.59078
13.1268	8.43944	0.44645	0.57311
13.1258	8.44657	0.28751	0.55124
12.7357	8.20366	0.26584	0.53412
11.9757	7.56816	0.30043	0.52767
11.0326	6.46381	0.28038	0.53182
10.0163	5.09759	0.37112	0.54403
9.03305	4.10926	0.6193	0.56366
8.23186	4.12162	0.79625	0.59229
7.65241	4.78759	0.67627	0.63004
7.17397	5.48093	0.47247	0.67143
6.82536	6.00218	0.45922	0.70617
6.74209	6.34393	0.38884	0.7255
6.70988	6.58122	0.17675	0.72509
6.74467	6.8928	0.17259	0.70424
7.16433	7.49679	0.25621	0.66759
8.16717	8.55635	0.28404	0.62297
9.72133	10.1428	0.3383	0.57618
11.7493	12.2406	0.37269	0.53239
14.1582	14.8272	0.32509	0.4996
16.7101	17.8878	0.35734	0.48916
19.1613	21.0447	0.50795	0.51908
20.9467	23.4057	0.65475	0.60857
21.5248	24.104	0.75753	0.7538
21.0206	22.7065	0.96147	0.92727
19.5598	19.441	1.23099	1.10504
17.3872	15.3447	1.47755	1.27191
14.6903	11.4225	1.74399	1.42928
11.2781	7.87445	2.01647	1.62447
7.47956	4.65521	2.40587	1.91681
3.90982	1.86682	3.02585	2.29655
1.23748	0.91177	3.68455	2.70585
1.43837	2.07042	4.16663	3.11394
2.16248	2.41531	4.58249	3.53548
2.01224	2.06017	5.06303	3.97021
1.67657	1.38369	5.46885	4.35276
1.49439	0.76336	5.71499	4.60349
1.15209	0.49976	5.78894	4.68985
0.7008	0.44687	5.77311	4.63708
0.45462	0.36145	5.77373	4.5176
0.36312	0.281	5.73647	4.41811
0.30134	0.28148	5.76544	4.40414
0.19124	0.33405	5.95011	4.50834
0.11726	0.37721	6.12355	4.71882
0.08585	0.38951	6.25704	4.96244
0.21683	0.37757	6.32047	5.12825
0.1545	0.36013	6.26412	5.13133
0.17845	0.34833	6.16726	4.9436
0.39021	0.34296	5.99096	4.57102
0.3881	0.34399	5.64782	4.02675
0.27536	0.35078	4.95803	3.34011
0.19625	0.35992	4.04343	2.76817
0.10255	0.36352	3.62005	3.0589
0.14112	0.35594	3.96165	4.31697
0.24597	0.33887	4.70742	5.80203
0.27534	0.31485	5.50134	7.09003
0.22869	0.28451	6.61824	8.15347
0.17385	0.25325	8.54349	9.14808
0.28421	0.23419	10.8747	10.2197
0.1966	0.23427	12.7445	11.3934
0.21017	0.24757	13.6984	12.3949
0.33512	0.26862	13.8836	12.728
0.26338	0.29498	13.5669	12.2032
0.12695	0.32398	12.8691	11.0928
0.1438	0.35315	12.0268	9.77134
0.23285	0.38253	11.2836	8.54182
0.30375	0.41264	10.7144	7.62289
0.31089	0.439	10.2269	7.03374
0.31116	0.45422	9.73075	6.59054
0.24581	0.45334	9.26122	6.08862
0.14759	0.43626	8.71066	5.45896
0.10222	0.4088	8.12703	4.76017
0.13056	0.37973	7.58134	4.12976
0.286	0.35545	6.90849	3.78076
0.17056	0.33844	6.43648	3.77155
0.10539	0.32953	6.18077	3.86804
0.11058	0.3304	5.67466	3.85275
0.12302	0.34252	4.96319	3.70369
0.08936	0.36418	4.20927	3.57415
0.0448	0.39046	3.83532	3.70921
0.03188	0.41701	4.13626	4.29797
0.07197	0.44144	4.77603	5.30298
0.04272	0.46101	5.57009	6.50641
0.07359	0.47191	6.42133	7.80963
0.07828	0.47045	7.49916	9.44464
0.10978	0.45602	9.485	11.911
0.17149	0.43391	12.6918	15.6053
0.2596	0.41275	16.4114	20.2507
0.3506	0.40235	19.6648	24.5425
0.45458	0.42684	21.2902	26.6809
0.65131	0.54165	20.5989	25.6964
0.91695	0.78705	18.0135	22.1159
1.20432	1.13445	14.4797	17.1325
1.48489	1.49102	10.7021	11.6585
1.67911	1.73032	7.19428	6.54196
1.72394	1.76892	4.43324	2.75513
1.59217	1.60843	2.39409	0.83644
1.33489	1.31665	0.9393	0.59472
1.04661	1.01521	0.60873	0.51276
0.86321	0.82937	0.89161	0.37163
0.83459	0.78047	1.11925	0.35283
0.82674	0.81159	1.26008	0.33942
0.82404	0.88953	1.12124	0.30188
0.84082	0.99839	0.81585	0.30363
0.88478	1.11469	0.62084	0.36736
0.95123	1.22241	0.50569	0.45135
0.99155	1.32007	0.30774	0.5168
0.94898	1.40523	0.18044	0.55315
0.81412	1.47166	0.16631	0.5644
0.75062	1.52042	0.04724	0.55946
0.65563	1.57059	0.20156	0.54838
0.46343	1.6506	0.18533	0.5378
0.3533	1.76655	0.1295	0.52754
0.32133	1.89555	0.10174	0.51247
0.44521	2.01015	0.08288	0.4929
0.56285	2.10034	0.03647	0.4782
0.5116	2.17254	0.14409	0.47617
0.36889	2.23393	0.13039	0.48457
0.29053	2.29172	0.09524	0.4938
0.3338	2.35603	0.09046	0.49742
0.65558	2.44465	0.18589	0.49876
1.03644	2.58662	0.13741	0.50643
1.46506	2.80065	0.07531	0.52468
1.90163	3.0678	0.0544	0.54916
2.29556	3.3351	0.10338	0.57291
2.65514	3.55085	0.07442	0.59176
2.89534	3.69317	0.11448	0.60329
3.02823	3.77049	0.22442	0.60594
3.09692	3.80391	0.23441	0.59901
3.11278	3.81195	0.10587	0.58285
3.12326	3.81014	0.13451	0.56005
3.07018	3.81184	0.13997	0.53455
2.98829	3.82632	0.08006	0.51035
2.89635	3.85841	0.06455	0.49298
2.79813	3.90559	0.02303	0.48856
2.75266	3.95848	0.09036	0.49841
2.62345	4.00878	0.092	0.51615
2.5379	4.05625	0.1432	0.53318
2.62598	4.10668	0.17649	0.54457
2.58209	4.1678	0.32284	0.5483
2.43677	4.25208	0.36651	0.54361
2.44583	4.37813	0.23255	0.53052
2.52443	4.56079	0.60945	0.51061
2.51972	4.79219	0.6615	0.48795
2.28394	5.04143	0.43344	0.46591
1.92742	5.28424	0.24036	0.44533
1.58354	5.53571	0.19467	0.4293
1.36915	5.86397	0.24898	0.4252
1.37507	6.34222	0.2595	0.43877
1.61592	6.94238	0.33238	0.46808
2.3103	7.51272	0.41941	0.50728
3.86538	7.93531	0.63819	0.55128
6.32189	8.35957	0.6934	0.59352
8.72248	9.07386	0.97609	0.62463
10.3459	9.96864	0.60725	0.63533
11.1932	10.5726	0.41589	0.62271
11.5446	10.5089	0.32809	0.59386
11.6732	9.75128	0.41101	0.56018
11.786	8.69713	0.38404	0.52972
11.7552	7.83451	0.36825	0.50738
11.4454	7.26678	0.47225	0.49769
10.9602	6.74474	0.25926	0.50295
10.3476	6.03183	0.20107	0.52154
9.68539	5.10806	0.27991	0.54902
8.98446	4.11973	0.30829	0.57762
8.22347	3.21832	0.27197	0.59782
7.52528	2.46738	0.26359	0.6048
6.99227	1.91041	0.36955	0.60043
6.5791	1.80369	0.39964	0.5892
6.29954	2.38071	0.51525	0.57542
6.21154	3.30438	0.59225	0.5621
6.27656	4.1958	0.37709	0.54961
6.2466	4.90051	0.17037	0.5365
5.88106	5.39052	0.10582	0.52264
5.52845	5.67992	0.04533	0.512
5.53444	5.89065	0.18395	0.51217
6.00504	6.32458	0.31394	0.53051
7.03624	7.44372	0.40424	0.56908
8.74424	9.69336	0.41948	0.62009
11.3831	13.0915	0.37332	0.6665
14.6985	16.9991	0.46684	0.69119
17.8117	20.4468	0.62361	0.69179
20.0594	22.6475	0.70028	0.68716
20.8385	23.0608	0.70425	0.707
19.9421	21.508	0.79943	0.77536
18.1786	18.6351	1.07802	0.90298
[truncated: 4,003 more rows]

## Sheet: Participant 6
Resultant linear accelerations
Left shoe		Right shoe
Motion capture system	Shoe-type IMU	Motion capture system	Shoe-type IMU
0.34252	0.82216	0.19082	0.65647
0.34186	0.85305	0.15368	0.6499
0.34241	0.87593	0.15501	0.64479
0.29554	0.89633	0.13084	0.64548
0.24689	0.93436	0.22323	0.65838
0.19467	1.01428	0.13878	0.68877
0.23166	1.15095	0.16351	0.73624
0.31128	1.35463	0.11583	0.79293
0.34752	1.63752	0.11089	0.84676
0.41795	1.98827	0.14913	0.88749
0.50351	2.35567	0.15469	0.91182
0.62598	2.67972	0.19833	0.92236
0.79211	2.93448	0.22932	0.92293
0.82402	3.14849	0.20301	0.91661
0.91737	3.38378	0.26413	0.90485
1.02363	3.68588	0.26587	0.88626
0.94524	4.04953	0.21206	0.85802
1.04754	4.43341	0.42394	0.81989
1.41614	4.79465	0.37134	0.77742
1.9352	5.07392	0.15537	0.73938
2.45558	5.17799	0.10706	0.71162
2.80566	5.03387	0.19354	0.69655
2.96049	4.64697	0.22138	0.69559
2.82574	4.10231	0.18665	0.70883
2.6184	3.53395	0.12131	0.73384
2.61234	3.08251	0.09513	0.76611
2.56985	2.94234	0.11772	0.80028
2.45688	3.35634	0.14206	0.83205
2.42102	4.26884	0.23223	0.86053
3.17422	5.41401	0.22205	0.88688
4.92838	6.73258	0.15559	0.91038
6.99235	8.41604	0.1801	0.92759
8.64007	10.3978	0.16456	0.93438
9.65001	12.1075	0.25614	0.92871
10.1379	13.0825	0.25338	0.91229
10.3451	13.3221	0.1191	0.8895
10.4001	13.091	0.13563	0.86544
10.1417	12.6968	0.12932	0.84396
9.70944	12.2836	0.14391	0.82694
9.13295	11.7695	0.21472	0.81644
8.28631	11.0146	0.2532	0.81536
7.34235	9.99031	0.27608	0.82499
6.3904	8.81599	0.27603	0.84429
5.41359	7.58598	0.11896	0.87043
4.38275	6.21078	0.25229	0.89701
3.0547	4.66578	0.17617	0.91399
2.14521	3.90023	0.2249	0.91208
4.39145	6.14263	0.23471	0.88616
9.40808	11.1759	0.20484	0.83815
16.102	17.9706	0.24979	0.78032
21.7953	24.8399	0.07586	0.7314
24.1792	29.372	0.21497	0.70934
22.8973	30.0912	0.2794	0.72104
19.3691	26.9238	0.31971	0.74768
14.977	20.6839	0.25482	0.76088
10.5516	13.2536	0.37808	0.76133
6.83385	7.05548	0.51551	0.79704
4.124	3.44097	0.56127	0.89349
2.29734	1.99517	0.63131	0.98037
1.42139	1.32644	0.64824	0.99821
1.33241	0.72749	0.66486	0.96522
1.40557	0.25803	0.71117	0.92569
1.36709	0.27775	0.60881	0.90903
1.23238	0.42622	0.49655	0.92319
1.06871	0.47633	0.42881	0.96463
0.83005	0.46768	0.397	1.02907
0.61514	0.44638	0.43477	1.10838
0.4779	0.4372	0.56346	1.18881
0.37117	0.44297	0.68647	1.25877
0.29936	0.45189	0.73567	1.31875
0.12307	0.45128	0.73461	1.37921
0.14295	0.436	0.78225	1.44743
0.15668	0.41085	0.95611	1.51979
0.15832	0.38984	1.24547	1.58641
0.15462	0.37911	1.41276	1.63787
0.12441	0.37118	1.43044	1.66271
0.06623	0.36166	1.36977	1.64923
0.14405	0.35217	1.16109	1.60329
0.14279	0.34515	0.906	1.55665
0.06779	0.34343	0.65193	1.55712
0.03432	0.35012	0.4151	1.63513
0.05015	0.36725	0.2892	1.76171
0.03831	0.39166	0.25553	1.88561
0.16556	0.41568	0.34741	1.99325
0.17466	0.43277	0.75456	2.11084
0.11986	0.4406	1.38724	2.27987
0.11412	0.43954	2.04913	2.53505
0.07512	0.43002	2.76442	2.90673
0.09066	0.41334	3.53306	3.39
0.01763	0.39208	4.23599	3.9013
0.06222	0.36838	4.77136	4.32484
0.07094	0.34507	5.13551	4.58464
0.15069	0.32629	5.30361	4.67497
0.11996	0.31575	5.26022	4.64609
0.066	0.31584	5.28933	4.56022
0.03999	0.32645	5.32375	4.46357
0.04328	0.34429	5.13174	4.3767
0.09922	0.36537	4.78589	4.29465
0.064	0.38745	4.38603	4.19779
0.18624	0.40835	3.77409	4.04987
0.15744	0.42444	2.89794	3.81912
0.12386	0.43366	2.08661	3.57676
0.07744	0.43794	2.19791	3.5753
0.05376	0.44141	3.77246	4.02587
0.08008	0.44683	6.43479	4.88532
0.16023	0.45243	9.501	6.24939
0.30673	0.45341	12.1304	8.18976
0.29071	0.44616	13.7732	10.25
0.1973	0.43051	14.6391	11.8013
0.07155	0.41061	15.2759	12.4926
0.09202	0.39244	15.9273	12.4741
0.10929	0.37989	16.3429	12.2407
0.12995	0.37484	16.1122	11.9133
0.16228	0.37874	15.2111	11.168
0.18528	0.39194	13.7247	9.81715
0.08019	0.41327	11.821	7.9476
0.10417	0.44113	9.77043	5.87288
0.09227	0.47227	8.04586	3.99006
0.07856	0.50096	6.79131	2.54958
0.0531	0.52206	5.34588	1.76395
0.08542	0.53299	3.98201	2.0592
0.12405	0.5324	4.02514	3.24251
0.16765	0.51871	5.26658	4.84921
0.14756	0.49112	6.97789	6.81006
0.10442	0.45209	8.95677	9.15418
0.09392	0.40602	11.1823	11.7804
0.05666	0.35664	13.836	14.5367
0.12394	0.31029	16.9684	17.3295
0.08247	0.27675	19.3644	19.9933
0.11659	0.26305	20.2667	21.8897
0.17619	0.27252	19.6765	22.0676
0.1677	0.30826	17.5943	20.1916
0.13623	0.36153	14.5541	16.6689
0.1481	0.40706	11.3263	12.103
0.09279	0.43241	8.27714	7.4184
0.14633	0.45391	5.61311	3.81803
0.16254	0.48759	3.53601	1.95021
0.1389	0.52118	2.13954	1.27547
0.1853	0.52972	1.32544	0.83677
0.17321	0.50487	0.97559	0.48075
0.09493	0.4653	0.94963	0.44539
0.1132	0.43828	0.98572	0.55469
0.08037	0.4351	0.9089	0.60278
0.13158	0.45389	0.80645	0.59516
0.2048	0.49632	0.76347	0.56975
0.26703	0.56957	0.57307	0.55146
0.28107	0.68206	0.33222	0.55063
0.27579	0.83759	0.19653	0.56813
0.27103	1.01596	0.15517	0.59943
0.27537	1.17128	0.07432	0.63842
0.27674	1.26578	0.16732	0.68125
0.19693	1.29608	0.34886	0.72708
0.12631	1.29772	0.38487	0.77413
0.13454	1.33127	0.39611	0.81768
0.12294	1.44101	0.36643	0.85372
0.09464	1.63483	0.44516	0.88058
0.22328	1.91395	0.43636	0.89744
0.45043	2.29072	0.48723	0.90205
0.65362	2.75071	0.59722	0.88926
0.73405	3.22363	0.41933	0.85463
0.85153	3.62339	0.52753	0.80033
1.10607	3.90043	0.88217	0.73588
1.25709	4.06003	0.57638	0.6739
1.32334	4.14197	0.29259	0.62404
1.45156	4.18894	0.26142	0.58896
1.64765	4.23793	0.40592	0.56731
1.88728	4.31501	0.26209	0.5587
2.18838	4.41544	0.3206	0.56378
2.50352	4.49606	0.31519	0.58359
2.49653	4.49228	0.12646	0.61937
2.41821	4.35601	0.37714	0.66914
2.73959	4.10759	0.68601	0.72538
2.98939	3.8692	0.39308	0.77834
3.1	3.78695	0.17238	0.82184
3.23095	3.84314	0.16501	0.85603
3.21786	3.97581	0.25351	0.88327
3.80847	4.52352	0.51878	0.90237
5.58861	6.0847	0.55892	0.90959
7.88184	8.44987	0.56533	0.90194
9.90801	10.7357	0.45908	0.87966
10.9525	12.3469	0.21169	0.84899
11.0158	13.1552	0.27618	0.8186
10.5895	13.1918	0.29607	0.79307
9.99519	12.6568	0.24323	0.77366
9.62511	12.0181	0.14539	0.76181
9.49663	11.6189	0.14465	0.7594
9.15063	11.3021	0.13051	0.76835
8.30715	10.6457	0.15524	0.79007
7.10051	9.35383	0.28026	0.82306
5.64373	7.4534	0.15728	0.86156
4.078	5.2552	0.31701	0.89717
2.59611	3.19163	0.13999	0.92205
1.74355	1.82263	0.09775	0.93218
2.31899	2.21073	0.09686	0.92729
3.2709	3.80794	0.17096	0.90939
4.14411	5.58388	0.23017	0.88315
5.11066	7.19173	0.21281	0.85407
6.43751	8.61927	0.2036	0.82414
8.36298	10.103	0.15992	0.79212
10.8121	11.9305	0.08289	0.75632
13.7075	14.2485	0.11307	0.7174
16.39	16.9139	0.09359	0.68289
17.8728	19.2584	0.17948	0.66462
17.6939	20.3123	0.19591	0.66837
15.8077	19.5094	0.16238	0.6921
12.7242	16.8068	0.08955	0.73257
9.37792	12.5138	0.09461	0.78209
6.61794	7.61508	0.10551	0.82547
4.55723	3.68875	0.15564	0.85298
3.13221	2.18481	0.04658	0.86522
2.47386	2.25825	0.12296	0.86563
2.26108	2.04103	0.13681	0.85753
2.13935	1.47245	0.26295	0.84254
1.96661	0.89567	0.20285	0.82098
1.69264	0.5102	0.21549	0.79278
1.38163	0.31255	0.20449	0.75976
1.07268	0.20918	0.20172	0.72936
0.76792	0.15114	0.16515	0.70831
0.58461	0.1466	0.26392	0.69482
0.54472	0.18435	0.32167	0.68522
0.48234	0.23093	0.46574	0.68941
0.36805	0.26352	0.83046	0.74662
0.28249	0.27531	1.31529	0.92629
0.24474	0.2771	1.79382	1.27786
0.18773	0.29045	2.24094	1.75349
0.12303	0.32818	2.55294	2.21987
0.14069	0.37549	2.69207	2.54441
0.13874	0.40814	2.73407	2.6485
0.15855	0.41469	2.57254	2.52159
0.16906	0.40003	2.26581	2.2275
0.12803	0.37908	1.93093	1.88852
0.05665	0.36066	1.59476	1.63931
0.09503	0.34122	1.39107	1.54769
0.10257	0.31624	1.34632	1.58194
0.07951	0.28713	1.44696	1.68807
0.11052	0.26115	1.69511	1.84798
0.15752	0.24585	2.05191	2.07521
0.1449	0.24269	2.44119	2.36916
0.13876	0.24868	2.74336	2.68527
0.13027	0.26161	2.99459	2.96575
0.0421	0.28242	3.3604	3.17809
0.06704	0.31376	3.60831	3.3248
0.10081	0.35702	3.60077	3.4242
0.13733	0.40889	3.6041	3.48774
0.08437	0.46026	3.56817	3.51809
0.11025	0.50057	3.50978	3.50937
0.17191	0.5222	3.43631	3.44808
0.18446	0.52237	3.09733	3.33218
0.17101	0.50294	2.60182	3.20217
0.12434	0.46875	2.02376	3.15098
0.09301	0.42676	1.54848	3.27951
0.04785	0.38315	1.64362	3.65354
0.09604	0.34062	2.20549	4.25681
0.11756	0.30181	2.96949	4.94501
0.09584	0.27134	4.11929	5.53771
0.07112	0.2525	5.97083	6.00531
0.17791	0.24719	8.29572	6.61178
0.23306	0.25698	10.463	7.62534
0.21711	0.28082	11.959	8.81683
0.16112	0.31571	12.9524	9.79837
0.05171	0.36002	13.7312	10.4647
0.1172	0.41145	14.3459	10.9279
0.13448	0.46404	14.7115	11.2893
0.22795	0.51034	14.6657	11.2977
0.18596	0.54491	14.0232	10.515
0.17781	0.56643	12.6503	8.85626
0.19228	0.57638	10.7328	6.67351
0.20657	0.57565	8.69685	4.51276
0.15715	0.56386	6.85458	2.80423
0.07432	0.53968	5.25613	1.78403
0.07548	0.50244	4.37474	1.97754
0.12706	0.45598	4.40748	3.09282
0.09211	0.40761	4.84798	4.31676
0.25576	0.36313	5.46407	5.3422
0.2969	0.32747	6.01038	6.18602
0.16592	0.30534	6.56024	7.04385
0.12312	0.29778	7.68362	8.19285
0.07662	0.30289	10.006	9.98529
0.2229	0.31841	12.8602	12.658
0.13525	0.34159	15.1314	15.9443
0.08599	0.36917	16.639	18.9049
0.06352	0.39879	16.968	20.3074
0.10612	0.43064	15.8016	19.4118
0.10581	0.46759	13.5743	16.3873
0.22454	0.50635	10.6779	12.056
0.12615	0.53159	7.6302	7.57124
0.11942	0.53247	5.03006	4.05481
0.07005	0.51563	3.17975	2.03838
0.12413	0.49282	1.93874	1.27979
0.12819	0.4683	1.07107	0.99721
0.05658	0.44126	0.81997	0.7438
0.09738	0.41186	0.86145	0.5705
0.12669	0.38502	0.85513	0.53161
0.10879	0.36768	0.91671	0.53914
0.19102	0.36564	0.78552	0.54211
0.23965	0.38694	0.56216	0.54383
0.26388	0.44364	0.51755	0.55748
0.19613	0.54855	0.32329	0.59283
0.10089	0.70647	0.18318	0.64694
0.20286	0.89935	0.30921	0.70457
0.31815	1.09208	0.26493	0.75329
0.21527	1.25765	0.26787	0.7893
0.15837	1.37638	0.24452	0.81204
0.24584	1.42554	0.23617	0.82152
0.25539	1.39723	0.17213	0.81761
0.2083	1.31581	0.32406	0.80019
0.16494	1.22541	0.10604	0.77134
0.18494	1.16745	0.10774	0.7358
0.27153	1.17082	0.11666	0.70062
0.36042	1.25561	0.11083	0.6739
0.46038	1.44026	0.12431	0.66141
0.56023	1.73357	0.11877	0.66529
0.7588	2.11579	0.09668	0.68459
0.99633	2.55414	0.11117	0.71529
1.03743	3.03395	0.03645	0.7532
1.02992	3.53146	0.10452	0.79635
1.15149	3.98776	0.1615	0.84173
1.20329	4.34846	0.39349	0.8836
1.14154	4.59994	0.43402	0.91742
1.12885	4.7588	0.15566	0.93987
1.38356	4.83502	0.40775	0.9472
1.7754	4.80665	0.48878	0.93775
2.03658	4.6425	0.42292	0.91217
2.31834	4.34792	0.23689	0.87115
2.53678	3.98944	0.14919	0.81736
2.46671	3.68192	0.17331	0.75736
2.57452	3.5295	0.23822	0.7007
2.94725	3.59587	0.18169	0.65707
3.05519	3.90317	0.1717	0.63299
3.05603	4.38576	0.26085	0.6322
3.5853	4.98317	0.39268	0.65524
5.12208	5.90635	0.35034	0.69494
7.23829	7.653	0.29329	0.73969
9.55813	10.184	0.1443	0.78362
11.2921	12.6427	0.14945	0.82733
11.6008	14.2621	0.11653	0.87189
11.3266	14.8272	0.19928	0.917
11.3419	14.5466	0.30779	0.95888
11.3663	13.8386	0.25456	0.98995
11.0494	12.983	0.13056	1.00456
10.3161	11.9332	0.08533	1.00142
9.2453	10.5458	0.07498	0.98106
7.82892	8.85306	0.15381	0.94533
6.18209	7.12056	0.23561	0.89896
4.54919	5.61243	0.11205	0.85014
3.00125	4.33522	0.17365	0.80706
1.87271	3.3017	0.16212	0.77353
2.08564	3.23369	0.098	0.75021
3.8524	5.01839	0.16957	0.73697
6.80318	8.45671	0.26399	0.73126
11.1175	13.4679	0.20523	0.72848
16.5268	19.6528	0.23414	0.72638
21.3633	25.736	0.2486	0.72744
23.7854	29.8955	0.09303	0.73804
22.8281	30.4308	0.103	0.76684
19.2833	26.8283	0.19411	0.81393
14.8752	20.4889	0.18003	0.86052
10.6238	13.7106	0.08976	0.88609
6.96087	7.99925	0.13524	0.88728
4.23854	3.95047	0.14823	0.87938
2.39704	1.94726	0.23664	0.87989
1.37739	1.45879	0.34594	0.87953
1.27365	1.10348	0.26347	0.85802
1.58329	0.64313	0.22101	0.81531
1.68806	0.24387	0.23423	0.76529
1.55603	0.08577	0.29221	0.72442
1.31246	0.19731	0.37273	0.70637
1.0088	0.25417	0.43825	0.71995
0.79395	0.27738	0.55282	0.77343
0.61646	0.29545	0.68978	0.8717
0.38507	0.32173	0.8265	1.00221
0.23207	0.35669	1.00409	1.13904
0.18566	0.39483	1.15458	1.27047
0.17092	0.43219	1.27501	1.40318
0.2109	0.46483	1.41076	1.54118
0.23823	0.48357	1.59236	1.67808
0.30606	0.48071	1.82029	1.80923
0.20865	0.45794	2.02283	1.94313
0.16275	0.42343	2.18298	2.09062
0.17078	0.38604	2.36165	2.24205
0.11817	0.34865	2.53871	2.36084
0.16064	0.30743	2.61381	2.40333
0.18775	0.26168	2.53258	2.3564
0.13706	0.21949	2.39567	2.25959
0.07512	0.1937	2.32443	2.18243
0.07126	0.19456	2.29328	2.1813
0.13554	0.22302	2.35871	2.28214
0.06134	0.27048	2.59145	2.49089
0.12979	0.32382	2.86236	2.79121
0.1192	0.37238	3.10445	3.13151
0.07585	0.41163	3.42408	3.43591
0.13783	0.44223	3.75626	3.63875
0.11605	0.46526	3.93109	3.72105
0.17442	0.4786	3.95579	3.71158
0.16599	0.47934	3.86726	3.65069
0.15053	0.46643	3.73518	3.5708
0.09546	0.44058	3.5915	3.50266
0.10792	0.40478	3.39562	3.46793
0.04163	0.36228	3.1947	3.46266
0.11326	0.3143	2.915	3.46228
0.10516	0.26397	2.45838	3.46967
0.06302	0.21899	1.98676	3.58276
0.07322	0.18807	1.98049	3.96619
0.19221	0.1794	2.77436	4.64586
0.19841	0.20028	4.02487	5.43489
0.16748	0.25208	5.77347	6.21176
0.18664	0.3257	8.24947	7.13166
0.14924	0.4039	11.0008	8.49049
0.1159	0.46952	13.1272	10.1794
0.09978	0.51618	14.1615	11.5284
0.22177	0.54728	14.634	12.1625
0.30233	0.56626	15.4553	12.4532
0.19377	0.57307	16.6449	12.8215
0.16848	0.56572	17.3692	13.1708
0.21436	0.54288	17.1629	13.0345
0.17613	0.50757	16.013	11.9434
0.14947	0.46554	14.1601	9.99795
0.0704	0.42027	12.052	7.84763
0.11606	0.37471	10.0159	6.0093
0.14255	0.33488	8.39725	4.64738
0.26869	0.30787	7.35866	3.75764
0.31197	0.29851	6.23202	3.34772
0.19392	0.30719	5.06689	3.58736
0.11942	0.32924	4.85795	4.80568
0.0936	0.35675	6.57745	7.40463
0.08607	0.38136	10.4069	11.5058
0.16062	0.39657	15.4342	16.675
0.10547	0.40015	20.2196	22.1615
0.05359	0.39462	23.465	27.2594
0.13483	0.38745	24.3183	30.8705
0.11066	0.39265	22.9465	31.3007
0.09997	0.41739	19.88	27.5792
0.08015	0.44377	15.728	20.6843
0.03721	0.4509	11.6045	12.9305
0.10208	0.43837	8.11663	6.50605
0.17145	0.42292	5.10319	2.74111
0.25728	0.42003	2.78609	1.64923
0.30272	0.41926	1.41099	1.21318
0.35354	0.40258	0.95886	0.58994
0.3714	0.37446	1.11633	0.14079
0.25789	0.35554	1.23755	0.4179
0.12602	0.36692	1.28074	0.58887
0.10133	0.41831	1.01662	0.65005
0.06273	0.50813	0.71035	0.68041
0.1416	0.63352	0.65097	0.71907
0.15183	0.79172	0.48524	0.76585
0.16262	0.96467	0.15277	0.80862
0.19156	1.11771	0.18492	0.83854
0.16438	1.22393	0.11769	0.84905
0.23204	1.27057	0.12449	0.83834
0.20697	1.24953	0.093	0.81093
0.20099	1.16208	0.24649	0.77441
0.19174	1.02502	0.13594	0.73766
0.1738	0.88112	0.28178	0.70603
0.15634	0.80388	0.18622	0.67898
0.16374	0.82225	0.09822	0.65757
0.17981	0.88702	0.11766	0.64832
0.17564	0.97074	0.10048	0.65681
0.2254	1.09803	0.06096	0.68112
0.28744	1.29098	0.05402	0.71553
0.36674	1.52072	0.1336	0.75535
0.36474	1.73489	0.09495	0.79537
0.45233	1.90335	0.17491	0.82909
0.52411	2.02693	0.58293	0.85082
0.52055	2.11758	0.67388	0.85884
0.49287	2.18279	0.26329	0.85549
0.48459	2.23326	0.23616	0.8437
0.44397	2.28853	0.21829	0.8261
0.38398	2.36618	0.20605	0.80544
0.43485	2.47304	0.27944	0.78348
0.61862	2.61331	0.17247	0.76153
0.65733	2.7979	0.18397	0.74096
0.64716	3.03027	0.31177	0.72308
0.91736	3.28912	0.30423	0.71082
1.10918	3.53706	0.25474	0.70808
1.24537	3.74244	0.27993	0.71587
1.54413	3.89058	0.36603	0.73238
1.92388	3.97579	1.44587	0.75648
2.2201	4.00536	1.6327	0.78775
2.40052	4.01813	0.92155	0.82335
2.48233	4.06291	0.31201	0.85661
2.56844	4.16006	0.4378	0.87985
2.64514	4.27518	0.55142	0.88968
2.61681	4.30702	0.56214	0.88809
2.95895	4.21204	0.6697	0.87859
4.10509	4.30598	0.6466	0.86296
5.72066	5.24768	0.39065	0.84113
7.2699	6.97386	0.32467	0.8139
8.56164	8.61687	0.21119	0.78631
9.23306	9.58543	0.1377	0.76519
9.18951	9.85463	0.1317	0.75327
8.72176	9.69458	0.06844	0.74899
8.47666	9.43135	0.08219	0.7501
8.79595	9.22658	0.10235	0.75579
9.01251	8.99826	0.07304	0.76709
8.7534	8.60509	0.33398	0.78616
8.14711	8.0039	0.41581	0.8137
7.39125	7.27793	0.16834	0.84666
6.60667	6.52674	0.42848	0.87795
5.78469	5.76639	0.11711	0.89938
4.92612	4.99787	0.13846	0.90609
4.23717	4.23154	0.14189	0.898
3.81162	3.46631	0.13393	0.87827
3.27032	2.84155	0.15236	0.85253
2.69671	2.72134	0.19667	0.8261
2.18982	3.28577	0.20746	0.80017
1.98922	4.4199	0.19419	0.77254
3.21016	6.3059	0.16564	0.74042
5.47213	9.30444	0.20928	0.70275
8.677	13.3009	0.05509	0.66395
12.2975	17.3952	0.18767	0.63326
15.5389	20.3748	0.17888	0.61792
18.1531	21.6119	0.20045	0.62008
19.5407	21.2275	0.20368	0.64245
18.9852	19.5078	0.19311	0.69076
16.4286	16.7735	0.21695	0.76248
12.9198	13.432	0.16175	0.83661
9.48212	9.83937	0.14834	0.88585
6.29153	6.5754	0.12459	0.90274
3.73583	4.32374	0.06802	0.90466
2.03948	2.99223	0.2079	0.90696
1.19786	1.97942	0.1993	0.90688
1.03702	1.10411	0.15264	0.89593
1.14445	0.44603	0.24135	0.87208
1.20731	0.08227	0.30921	0.84269
1.12861	0.20905	0.35358	0.81989
1.00972	0.28029	0.48444	0.81241
0.88092	0.27206	0.60005	0.82089
0.7378	0.22608	0.68014	0.84148
0.58001	0.1818	0.75251	0.87187
0.39633	0.17889	0.67908	0.91481
0.20255	0.23576	0.61295	0.97812
0.0859	0.32073	0.65905	1.06598
0.07373	0.39896	0.79014	1.17174
0.10366	0.45379	0.96823	1.28308
0.18165	0.48432	1.07351	1.38994
0.2314	0.49712	1.24784	1.4869
[truncated: 5,463 more rows]

## Sheet: Participant 7
Resultant linear accelerations
[truncated: 6,002 more rows]

[truncated: 10 more sheets: Participant 8, Participant 9, Participant 10, Participant 11, Participant 12, Participant 13, Participant 14, Participant 15, Participant 16, Participant 17]
