# Supplementary material for: Validity of shoe-type inertial measurement units for Parkinson’s disease patients during treadmill walking
Source: J Neuroeng Rehabil. 2018 May 15;15:38. doi: 10.1186/s12984-018-0384-9 (PMC5952468; doi:10.1186/s12984-018-0384-9)
Supplement: Supplementary file 5 — Raw data - total resultant linear accelerations. (XLSX 15774 kb) [file 12984_2018_384_MOESM5_ESM.xlsx]

## Sheet: Total left
바이콘	IMU	두값의 차	두값의 평균
1.00241	0.32562	0.67679	0.664015
0.43975	0.33373	0.10602	0.38674
0.15025	0.36198	-0.21173	0.256115
0.13438	0.40026	-0.26588	0.26732
0.2478	0.43788	-0.19008	0.34284
0.26949	0.46516	-0.19567	0.367325
0.25895	0.47893	-0.21998	0.36894
0.23324	0.48348	-0.25024	0.35836
0.23324	0.48431	-0.25107	0.358775
0.27869	0.48391	-0.20522	0.3813
0.21494	0.48406	-0.26912	0.3495
0.11622	0.49394	-0.37772	0.30508
0.2045	0.53421	-0.32971	0.369355
0.16447	0.60782	-0.44335	0.386145
0.38333	0.64415	-0.26082	0.51374
0.94252	0.55046	0.39206	0.74649
2.12777	0.82178	1.30599	1.47477
4.4332	2.12944	2.30376	3.28132
7.27122	4.17112	3.1001	5.72117
9.80613	6.52426	3.28187	8.1652
12.0619	8.71389	3.34801	10.3879
14.1033	10.5072	3.59608	12.3052
15.5382	11.9044	3.63381	13.7213
16.4451	12.9372	3.50791	14.6911
17.1304	13.6537	3.47671	15.3921
17.3922	14.1156	3.27661	15.7539
16.9585	14.3265	2.63201	15.6425
15.8545	14.1967	1.65781	15.0256
14.1588	13.5053	0.65354	13.8321
12.2312	11.9832	0.24802	12.1072
10.1012	9.54847	0.55275	9.82484
7.48337	6.43187	1.0515	6.95762
6.20148	3.20116	3.00032	4.70132
8.03514	2.14429	5.89085	5.08971
10.1445	4.7286	5.41594	7.43657
10.895	7.22469	3.67027	9.05983
10.3903	8.56242	1.82786	9.47635
9.35216	8.67607	0.67609	9.01412
8.46976	8.1832	0.28656	8.32648
7.93938	7.68077	0.25861	7.81007
7.77353	7.4242	0.34933	7.59886
7.88308	7.4812	0.40188	7.68214
8.02238	7.85766	0.16472	7.94002
8.17364	8.46909	-0.29545	8.32137
8.444	9.13071	-0.68671	8.78736
8.91186	9.68506	-0.7732	9.29846
9.53371	10.1002	-0.5665	9.81696
10.228	10.4306	-0.20255	10.3293
10.7805	10.7243	0.05623	10.7524
11.0091	10.9776	0.03152	10.9933
11.1195	11.1618	-0.04229	11.1406
11.2449	11.2606	-0.0157	11.2527
11.3558	11.2799	0.0759	11.3178
11.449	11.2409	0.20803	11.345
11.3988	11.164	0.23477	11.2814
11.1005	11.0541	0.04637	11.0773
10.6737	10.8959	-0.22215	10.7848
10.2006	10.6662	-0.46554	10.4334
9.66079	10.3574	-0.69659	10.0091
9.00814	9.96087	-0.95273	9.4845
8.13439	9.44793	-1.31354	8.79116
7.1244	8.81483	-1.69043	7.96962
6.03727	8.11713	-2.07986	7.0772
4.91826	7.44582	-2.52756	6.18204
4.1439	6.91942	-2.77552	5.53166
4.29243	6.8058	-2.51337	5.54912
5.39386	7.56464	-2.17078	6.47925
7.73397	9.34041	-1.60644	8.53719
11.0567	11.7049	-0.64819	11.3808
13.5446	14.1302	-0.58565	13.8374
13.9216	16.1784	-2.25674	15.05
15.1061	17.181	-2.07497	16.1436
19.2065	16.3422	2.86427	17.7743
21.6432	13.9854	7.65783	17.8143
21.0448	12.2094	8.8354	16.6271
18.4805	11.8493	6.63124	15.1649
15.0448	11.1453	3.89953	13.0951
11.3451	9.242	2.10306	10.2935
7.84599	6.52057	1.32542	7.18328
4.96139	3.71227	1.24912	4.33683
2.75933	1.57189	1.18744	2.16561
1.03214	0.81964	0.2125	0.92589
0.99399	1.15082	-0.15683	1.07241
1.85006	1.4031	0.44696	1.62658
2.0786	1.49083	0.58777	1.78471
1.89643	1.39309	0.50334	1.64476
1.54019	1.11789	0.4223	1.32904
1.068	0.76766	0.30034	0.91783
0.66375	0.4684	0.19535	0.566075
0.40101	0.34822	0.05279	0.374615
0.23635	0.3775	-0.14115	0.306925
0.11563	0.39117	-0.27554	0.2534
0.23569	0.37382	-0.13813	0.304755
0.27958	0.37353	-0.09395	0.326555
0.29219	0.40533	-0.11314	0.34876
0.26197	0.44214	-0.18017	0.352055
0.19765	0.46088	-0.26323	0.329265
0.18943	0.47187	-0.28244	0.33065
0.32867	0.50012	-0.17145	0.414395
0.41358	0.54702	-0.13344	0.4803
0.33389	0.58518	-0.25129	0.459535
0.22888	0.59517	-0.36629	0.412025
0.23201	0.58737	-0.35536	0.40969
0.12814	0.58409	-0.45595	0.356115
0.08542	0.59191	-0.50649	0.338665
0.18904	0.59842	-0.40938	0.39373
0.36718	0.59093	-0.22375	0.479055
0.38043	0.56902	-0.18859	0.474725
0.26502	0.5395	-0.27448	0.40226
0.52581	0.50683	0.01898	0.51632
0.36371	0.47183	-0.10812	0.41777
0.32302	0.43536	-0.11234	0.37919
0.30198	0.40049	-0.09851	0.351235
0.11498	0.37188	-0.2569	0.24343
0.23988	0.35384	-0.11396	0.29686
0.28976	0.3506	-0.06084	0.32018
0.2773	0.36476	-0.08746	0.32103
0.18788	0.3925	-0.20462	0.29019
0.13778	0.42443	-0.28665	0.281105
0.10935	0.45229	-0.34294	0.28082
0.10986	0.4726	-0.36274	0.29123
0.1296	0.49064	-0.36104	0.31012
0.16849	0.52146	-0.35297	0.344975
0.28725	0.56305	-0.2758	0.42515
0.78934	0.57747	0.21187	0.683405
2.10383	0.657	1.44683	1.38041
4.18675	1.34335	2.8434	2.76505
6.45209	2.86779	3.5843	4.65994
8.45484	4.94978	3.50506	6.70231
10.1044	7.09279	3.01159	8.59858
11.5718	8.86821	2.70362	10.22
13.0737	10.1421	2.93152	11.6079
14.5551	11.0865	3.46859	12.8208
15.9033	11.9914	3.91187	13.9473
16.9959	13.0029	3.99291	14.9994
17.6714	14.0259	3.64542	15.8487
17.831	14.8445	2.98654	16.3377
17.3159	15.2831	2.03277	16.2995
15.9266	15.1856	0.74103	15.5561
14.033	14.2627	-0.22969	14.1479
12.0448	12.1842	-0.1394	12.1145
9.42416	8.91996	0.5042	9.17206
7.32687	5.01189	2.31498	6.16938
8.9054	2.74781	6.15759	5.8266
11.5769	5.24875	6.32816	8.41283
12.9353	8.29051	4.64484	10.6129
13.0379	10.3258	2.71202	11.6819
12.3778	10.8529	1.52488	11.6153
11.4079	10.1264	1.28153	10.7672
10.5225	9.05212	1.47035	9.7873
9.95463	8.36281	1.59182	9.15872
9.68448	8.24539	1.43909	8.96494
9.61371	8.55116	1.06255	9.08244
9.72251	9.03545	0.68706	9.37898
9.83325	9.51174	0.32151	9.67249
9.99432	9.9205	0.07382	9.95741
10.4047	10.2886	0.1161	10.3466
11.0116	10.6534	0.35821	10.8325
11.6426	11.033	0.60966	11.3378
11.9954	11.4017	0.59363	11.6986
12.0518	11.6884	0.36342	11.8701
11.9446	11.8289	0.11577	11.8868
11.7218	11.7955	-0.0737	11.7586
11.4594	11.5902	-0.13082	11.5248
11.1933	11.247	-0.05365	11.2202
10.7487	10.8216	-0.07294	10.7852
10.0141	10.3652	-0.3511	10.1897
9.05652	9.89039	-0.83387	9.47346
7.89895	9.37079	-1.47184	8.63487
6.76345	8.79295	-2.0295	7.7782
5.75324	8.16236	-2.40912	6.9578
4.9255	7.51532	-2.58982	6.22041
4.581	7.05435	-2.47335	5.81768
5.24604	7.17465	-1.92861	6.21035
6.96432	8.1651	-1.20078	7.56471
9.79748	10.0339	-0.23646	9.91571
13.3772	12.6682	0.70898	13.0227
15.9624	15.7029	0.25945	15.8326
16.7492	18.3489	-1.59966	17.5491
17.825	19.6123	-1.78734	18.7186
20.3575	18.7757	1.58187	19.5666
21.1333	16.2753	4.858	18.7043
19.585	13.8723	5.71275	16.7287
16.6808	12.216	4.46478	14.4484
13.1733	10.2007	2.97258	11.687
9.70962	7.58177	2.12785	8.64569
6.63189	4.96037	1.67152	5.79613
4.08753	2.92067	1.16686	3.5041
2.24863	1.81891	0.42972	2.03377
1.03009	1.35896	-0.32887	1.19453
0.72072	1.06511	-0.34439	0.892915
1.44086	1.06617	0.37469	1.25352
2.08144	1.33939	0.74205	1.71042
2.09961	1.50954	0.59007	1.80458
1.67996	1.40249	0.27747	1.54122
1.1215	1.06214	0.05936	1.09182
0.61774	0.63671	-0.01897	0.627225
0.41818	0.31448	0.1037	0.36633
0.26638	0.28891	-0.02253	0.277645
0.16427	0.36437	-0.2001	0.26432
0.24857	0.39537	-0.1468	0.32197
0.41057	0.40631	0.00426	0.40844
0.4632	0.4201	0.0431	0.44165
0.3852	0.43381	-0.04861	0.409505
0.25082	0.43671	-0.18589	0.343765
0.21697	0.42738	-0.21041	0.322175
0.26402	0.41412	-0.1501	0.33907
0.43738	0.41111	0.02627	0.424245
0.45342	0.42857	0.02485	0.440995
0.24625	0.45857	-0.21232	0.35241
0.15285	0.49062	-0.33777	0.321735
0.20167	0.52957	-0.3279	0.36562
0.27042	0.58102	-0.3106	0.42572
0.34821	0.63142	-0.28321	0.489815
0.34822	0.65583	-0.30761	0.502025
0.32467	0.64421	-0.31954	0.48444
0.34746	0.60601	-0.25855	0.476735
0.3631	0.55299	-0.18989	0.458045
0.21301	0.49249	-0.27948	0.35275
0.06635	0.43113	-0.36478	0.24874
0.03184	0.3751	-0.34326	0.20347
0.18561	0.32871	-0.1431	0.25716
0.14229	0.29647	-0.15418	0.21938
0.13712	0.28601	-0.14889	0.211565
0.22853	0.30299	-0.07446	0.26576
0.19791	0.34412	-0.14621	0.271015
0.18135	0.39714	-0.21579	0.289245
0.10407	0.44559	-0.34152	0.27483
0.16011	0.47709	-0.31698	0.3186
0.15835	0.48943	-0.33108	0.32389
0.17721	0.49325	-0.31604	0.33523
0.13587	0.50993	-0.37406	0.3229
0.17099	0.55124	-0.38025	0.361115
0.26861	0.58221	-0.3136	0.42541
0.56572	0.52318	0.04254	0.54445
1.42705	0.43121	0.99584	0.92913
3.37466	0.92969	2.44497	2.15218
6.20555	2.17821	4.02734	4.19188
8.87058	4.12488	4.7457	6.49773
11.0499	6.57585	4.47409	8.81289
13.0549	9.0731	3.98185	11.064
14.8922	11.1886	3.70367	13.0404
16.4499	12.7607	3.6891	14.6053
17.6102	13.8887	3.72145	15.7494
18.2163	14.7392	3.47718	16.4778
18.1371	15.3467	2.79041	16.7419
17.2296	15.5442	1.68542	16.3869
15.4337	14.9602	0.47349	15.1969
13.0203	13.1966	-0.1763	13.1084
10.1512	10.1653	-0.01408	10.1582
7.21524	6.29491	0.92033	6.75507
6.9062	2.95608	3.95012	4.93114
9.11192	3.90848	5.20344	6.5102
10.7391	6.83171	3.90738	8.7854
11.1296	9.16348	1.96614	10.1465
10.8008	10.2405	0.56024	10.5206
10.2245	9.95653	0.26801	10.0905
9.62116	8.91043	0.71073	9.2658
9.14519	7.93351	1.21168	8.53935
8.90985	7.47788	1.43197	8.19387
8.95697	7.57619	1.38078	8.26658
9.163	8.09271	1.07029	8.62786
9.47077	8.84185	0.62892	9.15631
9.91193	9.62565	0.28628	9.76879
10.4653	10.3036	0.16169	10.3844
11.0878	10.8346	0.25318	10.9612
11.6643	11.2499	0.41446	11.4571
12.1512	11.5797	0.57156	11.8655
12.4394	11.8123	0.6271	12.1258
12.4462	11.9288	0.51743	12.1875
12.3225	11.9291	0.39339	12.1258
12.1391	11.8188	0.32032	11.979
11.8268	11.602	0.22487	11.7144
11.337	11.2648	0.07217	11.3009
10.5968	10.7673	-0.17045	10.6821
9.66996	10.0905	-0.42055	9.88023
8.59047	9.2814	-0.69093	8.93594
7.20628	8.4326	-1.22632	7.81944
5.74798	7.60635	-1.85837	6.67717
4.57357	6.82564	-2.25207	5.69961
3.64311	6.21976	-2.57665	4.93144
3.43713	6.08665	-2.64952	4.76189
4.49579	6.67013	-2.17434	5.58296
6.62546	8.00417	-1.37871	7.31482
9.9052	10.0443	-0.13914	9.97477
13.4975	12.6004	0.89713	13.0489
15.9856	15.2372	0.74839	15.6114
17.7671	17.3839	0.38323	17.5755
19.8798	18.4075	1.47222	19.1437
20.8482	18.172	2.67618	19.5101
19.6158	17.4655	2.15035	18.5406
16.8931	16.4408	0.45227	16.6669
13.7368	14.122	-0.3853	13.9294
10.4464	10.4216	0.02476	10.434
7.32672	6.44912	0.8776	6.88792
4.65684	3.33521	1.32163	3.99602
2.43459	1.61623	0.81836	2.02541
1.09749	1.10379	-0.0063	1.10064
1.08409	1.04878	0.03531	1.06644
1.63303	1.1976	0.43543	1.41532
1.9001	1.42456	0.47554	1.66233
1.88153	1.51487	0.36666	1.6982
1.64869	1.37344	0.27525	1.51106
1.19245	1.05696	0.13549	1.12471
0.7976	0.68744	0.11016	0.74252
0.54324	0.37377	0.16947	0.458505
0.32683	0.25728	0.06955	0.292055
0.15325	0.3297	-0.17645	0.241475
0.28532	0.38858	-0.10326	0.33695
0.41007	0.41144	-0.00137	0.410755
0.37386	0.42378	-0.04992	0.39882
0.33362	0.43374	-0.10012	0.38368
0.23655	0.43572	-0.19917	0.336135
0.16575	0.43032	-0.26457	0.298035
0.24597	0.43145	-0.18548	0.33871
0.32344	0.45493	-0.13149	0.389185
0.2248	0.50168	-0.27688	0.36324
0.18491	0.55376	-0.36885	0.369335
0.32833	0.59761	-0.26928	0.46297
0.38257	0.63667	-0.2541	0.50962
0.32519	0.67549	-0.3503	0.50034
0.20208	0.70376	-0.50168	0.45292
0.21917	0.69992	-0.48075	0.459545
0.31294	0.65056	-0.33762	0.48175
0.2183	0.56554	-0.34724	0.39192
0.25395	0.47123	-0.21728	0.36259
0.1573	0.39207	-0.23477	0.274685
0.11304	0.34057	-0.22753	0.226805
0.28305	0.31822	-0.03517	0.300635
0.34576	0.32116	0.0246	0.33346
0.30441	0.34352	-0.03911	0.323965
0.16803	0.37776	-0.20973	0.272895
0.18362	0.41698	-0.23336	0.3003
0.25015	0.45587	-0.20572	0.35301
0.13954	0.48668	-0.34714	0.31311
0.13868	0.50133	-0.36265	0.320005
0.18158	0.50711	-0.32553	0.344345
0.07689	0.53292	-0.45603	0.304905
0.34252	0.58485	-0.24233	0.463685
0.62676	0.59486	0.0319	0.61081
1.48409	0.56784	0.91625	1.02597
3.14897	1.10747	2.0415	2.12822
5.13464	2.47871	2.65593	3.80668
7.00217	4.36642	2.63575	5.68429
8.64559	6.33038	2.31521	7.48799
10.1233	7.94275	2.1805	9.033
11.5913	9.11092	2.48042	10.3511
13.2083	10.1052	3.10302	11.6567
15.0098	11.2399	3.76991	13.1249
16.8704	12.6056	4.26487	14.738
18.4375	14.1043	4.33326	16.2709
19.3351	15.592	3.74318	17.4635
19.2715	16.7886	2.48289	18.0301
17.9783	17.1836	0.79465	17.581
15.7888	16.2942	-0.50544	16.0415
13.2526	13.9645	-0.71192	13.6086
10.0051	10.4248	-0.41975	10.2149
6.57786	6.23615	0.34171	6.407
6.57541	2.25967	4.31574	4.41754
9.07132	3.16524	5.90608	6.11828
10.6763	6.6237	4.05263	8.65001
11.0375	9.01383	2.02366	10.0257
10.7022	9.94114	0.76102	10.3216
10.2006	9.78431	0.41627	9.99245
9.9355	9.15574	0.77976	9.54562
10.046	8.59751	1.4485	9.32176
10.3742	8.47659	1.89763	9.4254
10.7334	8.88657	1.84688	9.81001
11.0181	9.65656	1.36154	10.3373
11.2298	10.4856	0.74416	10.8577
11.4419	11.1431	0.29876	11.2925
11.5781	11.5537	0.02441	11.5659
11.7175	11.7512	-0.03368	11.7344
11.9764	11.8121	0.16431	11.8943
12.2045	11.8013	0.40322	12.0029
12.3491	11.7579	0.59119	12.0535
12.3569	11.7022	0.65472	12.0296
12.2258	11.635	0.59081	11.9304
12.1494	11.5436	0.60583	11.8465
12.0278	11.416	0.61173	11.7219
11.5966	11.2455	0.35105	11.4211
11.0528	11.0115	0.0413	11.0322
10.5792	10.6709	-0.09169	10.625
9.80335	10.1795	-0.37619	9.99144
8.64014	9.48389	-0.84375	9.06202
7.23425	8.53307	-1.29882	7.88366
5.49712	7.40367	-1.90655	6.4504
3.69505	6.37976	-2.68471	5.0374
2.87184	5.82003	-2.94819	4.34593
3.60113	5.92295	-2.32182	4.76204
5.24071	6.77873	-1.53802	6.00972
7.20355	8.51207	-1.30852	7.85781
10.0551	11.0714	-1.01628	10.5633
14.0095	14.0844	-0.07495	14.047
16.8213	16.9841	-0.16279	16.9027
17.474	19.0703	-1.5963	18.2722
18.3736	19.4831	-1.10946	18.9284
20.528	17.9927	2.53531	19.2603
20.8808	16.0047	4.8762	18.4428
18.8881	14.7617	4.1264	16.825
15.7521	13.3889	2.36319	14.5705
12.2944	11.1134	1.18095	11.7039
8.84883	8.27864	0.57019	8.56373
5.83845	5.41049	0.42796	5.62447
3.55669	2.95258	0.60411	3.25464
1.97063	1.38575	0.58488	1.67819
0.87261	0.96834	-0.09573	0.920475
1.00249	1.04265	-0.04016	1.02257
1.24679	1.1406	0.10619	1.19369
1.44919	1.22818	0.22101	1.33868
2.08666	1.20837	0.87829	1.64752
2.13957	1.02846	1.11111	1.58401
1.40401	0.75244	0.65157	1.07822
0.79694	0.47857	0.31837	0.637755
0.6191	0.31413	0.30497	0.466615
0.42752	0.31096	0.11656	0.36924
0.1484	0.34934	-0.20094	0.24887
0.36812	0.37477	-0.00665	0.371445
0.44639	0.40261	0.04378	0.4245
0.44025	0.43506	0.00519	0.437655
0.25542	0.45344	-0.19802	0.35443
0.19723	0.44681	-0.24958	0.32202
0.26662	0.43229	-0.16567	0.349455
0.43397	0.44503	-0.01106	0.4395
0.37609	0.49833	-0.12224	0.43721
0.19218	0.56236	-0.37018	0.37727
0.24873	0.60815	-0.35942	0.42844
0.28606	0.63789	-0.35183	0.461975
0.35312	0.66551	-0.31239	0.509315
0.43127	0.68956	-0.25829	0.560415
0.25251	0.69206	-0.43955	0.472285
0.20205	0.66118	-0.45913	0.431615
0.36238	0.60689	-0.24451	0.484635
0.39148	0.54959	-0.15811	0.470535
0.19991	0.501	-0.30109	0.350455
0.13807	0.46314	-0.32507	0.300605
0.08558	0.43627	-0.35069	0.260925
0.17687	0.42042	-0.24355	0.298645
0.16659	0.41446	-0.24787	0.290525
0.11125	0.41835	-0.3071	0.2648
0.14826	0.43425	-0.28599	0.291255
0.10308	0.46097	-0.35789	0.282025
0.24223	0.4885	-0.24627	0.365365
0.20733	0.50305	-0.29572	0.35519
0.15096	0.4994	-0.34844	0.32518
0.21002	0.48676	-0.27674	0.34839
0.29809	0.48214	-0.18405	0.390115
0.42016	0.50126	-0.0811	0.46071
0.31672	0.55373	-0.23701	0.435225
0.33014	0.61626	-0.28612	0.4732
0.85512	0.59986	0.25526	0.72749
2.1388	0.60751	1.53129	1.37315
4.49551	1.4891	3.00641	2.9923
7.10151	3.29558	3.80593	5.19855
9.26146	5.65753	3.60393	7.4595
11.1592	8.07537	3.08385	9.61729
12.9347	10.0723	2.86238	11.5035
14.5757	11.52	3.05573	13.0478
16.0115	12.6197	3.39179	14.3156
17.0363	13.5705	3.46581	15.3034
17.4168	14.3686	3.04815	15.8927
17.0316	14.8573	2.17435	15.9445
15.9162	14.8773	1.03893	15.3967
14.1331	14.2941	-0.16095	14.2136
11.7793	12.8545	-1.07524	12.3169
8.86638	10.2483	-1.38187	9.55731
6.19356	6.49899	-0.30543	6.34628
6.5481	2.47653	4.07157	4.51232
8.95859	3.27456	5.68403	6.11657
10.6548	6.43196	4.22284	8.54338
11.2183	8.50474	2.71361	9.86154
11.1596	9.38206	1.77755	10.2708
10.8233	9.27723	1.54611	10.0503
10.4217	8.64666	1.77501	9.53417
10.1326	8.09774	2.03483	9.11515
10.0179	8.0294	1.98851	9.02366
10.1275	8.45325	1.67425	9.29038
10.3233	9.11038	1.2129	9.71683
10.4763	9.73325	0.74309	10.1048
10.6977	10.2105	0.48719	10.4541
10.9617	10.5619	0.39985	10.7618
11.2818	10.8406	0.44111	11.0612
11.6994	11.0762	0.6232	11.3878
11.9986	11.276	0.72258	11.6373
12.0288	11.4255	0.60335	11.7271
11.8969	11.4908	0.4061	11.6938
11.7211	11.451	0.27014	11.5861
11.5556	11.2995	0.25611	11.4275
11.3625	11.0179	0.34455	11.1902
10.9492	10.5838	0.36538	10.7665
10.1275	9.99412	0.13334	10.0608
9.02077	9.25804	-0.23727	9.13941
7.76618	8.34501	-0.57883	8.0556
6.26588	7.195	-0.92912	6.73044
4.54188	5.90415	-1.36227	5.22302
2.9459	4.91681	-1.97091	3.93135
2.78518	4.84628	-2.0611	3.81573
4.51782	5.78483	-1.26701	5.15132
7.08184	7.45298	-0.37114	7.26741
10.5382	9.73644	0.80172	10.1373
14.3505	12.5771	1.77337	13.4638
17.374	15.7803	1.59376	16.5772
19.576	18.7584	0.81753	19.1672
20.664	20.7419	-0.07788	20.7029
19.9504	21.2974	-1.347	20.6239
17.5686	20.1224	-2.55373	18.8455
14.2165	17.04	-2.82349	15.6282
10.8917	12.6717	-1.78008	11.7817
7.92211	8.2201	-0.29799	8.0711
5.37664	4.61884	0.7578	4.99774
3.38832	2.31179	1.07653	2.85006
1.83773	1.30185	0.53588	1.56979
0.83652	1.02402	-0.1875	0.93027
1.27356	0.90606	0.3675	1.08981
1.68518	0.88163	0.80355	1.2834
1.79705	0.98214	0.81491	1.38959
1.71899	1.085	0.63399	1.40199
1.53673	1.07447	0.46226	1.3056
1.2712	0.93497	0.33623	1.10309
0.85892	0.70377	0.15515	0.781345
0.5099	0.45202	0.05788	0.48096
0.28192	0.2892	-0.00728	0.28556
0.1569	0.29073	-0.13383	0.223815
0.2459	0.34933	-0.10343	0.297615
0.3881	0.38489	0.00321	0.386495
0.40177	0.39826	0.00351	0.400015
0.39751	0.40117	-0.00366	0.39934
0.23235	0.39849	-0.16614	0.31542
0.27688	0.39077	-0.11389	0.333825
0.44237	0.38369	0.05868	0.41303
0.40283	0.39507	0.00776	0.39895
0.24021	0.42625	-0.18604	0.33323
0.14732	0.46156	-0.31424	0.30444
0.16202	0.49816	-0.33614	0.33009
0.25523	0.53888	-0.28365	0.397055
0.23649	0.57583	-0.33934	0.40616
0.13416	0.59408	-0.45992	0.36412
0.13376	0.585	-0.45124	0.35938
0.27187	0.55262	-0.28075	0.412245
0.26836	0.5075	-0.23914	0.38793
0.17538	0.4601	-0.28472	0.31774
0.1978	0.41774	-0.21994	0.30777
0.09251	0.38282	-0.29031	0.237665
0.22072	0.35602	-0.1353	0.28837
0.24555	0.34044	-0.09489	0.292995
0.16918	0.33846	-0.16928	0.25382
0.17008	0.34639	-0.17631	0.258235
0.10881	0.35638	-0.24757	0.232595
0.17505	0.36095	-0.1859	0.268
0.21895	0.3574	-0.13845	0.288175
0.20733	0.35896	-0.15163	0.283145
0.13677	0.40139	-0.26462	0.26908
0.18371	0.49959	-0.31588	0.34165
0.21623	0.58514	-0.36891	0.400685
0.53889	0.5461	-0.00721	0.542495
1.51574	0.6134	0.90234	1.06457
3.31867	1.53633	1.78234	2.4275
5.63647	3.13655	2.49992	4.38651
7.72074	5.0086	2.71214	6.36467
9.43341	6.74181	2.6916	8.08761
10.9726	8.15164	2.82095	9.56212
12.429	9.28256	3.14641	10.8558
13.7783	10.2373	3.54094	12.0078
14.9822	11.1437	3.83846	13.063
15.9606	12.1074	3.85319	14.034
16.5202	13.097	3.4232	14.8086
16.4853	13.9002	2.58509	15.1928
15.6853	14.1642	1.52114	14.9248
14.0237	13.5547	0.46905	13.7892
11.765	11.921	-0.156	11.843
9.20896	9.35744	-0.14848	9.2832
6.71363	6.24457	0.46906	6.4791
6.22732	3.26232	2.965	4.74482
7.92144	2.61351	5.30793	5.26748
9.22454	4.82085	4.40369	7.02269
9.53768	6.70053	2.83715	8.1191
9.33628	7.54367	1.79261	8.43998
9.05628	7.57809	1.47819	8.31719
8.92565	7.24748	1.67817	8.08657
9.02681	6.94344	2.08337	7.98513
9.30957	6.95886	2.35071	8.13422
9.7368	7.42781	2.30899	8.5823
10.2459	8.25644	1.98946	9.25117
10.7076	9.18199	1.52563	9.94481
11.0544	9.97652	1.07785	10.5154
11.4312	10.5704	0.86084	11.0008
11.9285	11.0151	0.91342	11.4718
12.439	11.3793	1.0597	11.9091
12.7776	11.6772	1.10043	12.2274
12.8403	11.8773	0.96294	12.3588
12.7502	11.9396	0.81064	12.3449
12.6121	11.8434	0.76873	12.2277
12.4165	11.6039	0.81261	12.0102
12.1043	11.2662	0.83809	11.6853
11.6174	10.8836	0.73385	11.2505
10.8832	10.4805	0.40267	10.6818
9.93876	10.0318	-0.09306	9.98529
9.00139	9.48886	-0.48747	9.24513
8.07001	8.77666	-0.70665	8.42333
6.74749	7.79656	-1.04907	7.27203
4.91134	6.57189	-1.66055	5.74161
3.28415	5.47659	-2.19244	4.38037
3.79937	5.32284	-1.52347	4.56111
6.68933	6.74834	-0.05901	6.71884
10.652	9.71369	0.9383	10.1828
15.1588	13.9197	1.2391	14.5393
19.2913	18.652	0.63925	18.9716
22.1487	22.663	-0.51434	22.4059
23.3036	24.6974	-1.39383	24.0005
22.383	24.4448	-2.06183	23.4139
19.7324	22.6867	-2.95426	21.2095
16.0993	19.968	-3.86867	18.0336
12.2985	16.0818	-3.78334	14.1902
8.80516	11.3108	-2.50559	10.058
5.8637	6.75001	-0.88631	6.30685
3.57637	3.43929	0.13708	3.50783
2.00844	1.86896	0.13948	1.9387
0.99249	1.46397	-0.47148	1.22823
1.05779	1.22458	-0.16679	1.14119
1.85229	1.14779	0.7045	1.50004
2.11809	1.31069	0.8074	1.71439
1.81491	1.4362	0.37871	1.62555
1.49	1.34764	0.14236	1.41882
1.15999	1.06083	0.09916	1.11041
0.76567	0.70188	0.06379	0.733775
0.48539	0.45775	0.02764	0.47157
0.22309	0.42129	-0.1982	0.32219
0.11168	0.42119	-0.30951	0.266435
0.1935	0.38385	-0.19035	0.288675
0.33109	0.35779	-0.0267	0.34444
0.43472	0.36904	0.06568	0.40188
0.39952	0.39494	0.00458	0.39723
0.42719	0.40949	0.0177	0.41834
0.42914	0.41002	0.01912	0.41958
0.30425	0.40131	-0.09706	0.35278
0.38156	0.38648	-0.00492	0.38402
0.30493	0.38661	-0.08168	0.34577
0.17807	0.42258	-0.24451	0.300325
0.10532	0.48478	-0.37946	0.29505
0.25706	0.55256	-0.2955	0.40481
0.4017	0.61211	-0.21041	0.506905
0.4061	0.65028	-0.24418	0.52819
0.29804	0.65404	-0.356	0.47604
0.25407	0.6246	-0.37053	0.439335
0.27948	0.57762	-0.29814	0.42855
0.15949	0.52699	-0.3675	0.34324
0.11717	0.47882	-0.36165	0.297995
0.09265	0.43479	-0.34214	0.26372
0.09289	0.39516	-0.30227	0.244025
0.16654	0.36361	-0.19707	0.265075
0.19076	0.34646	-0.1557	0.26861
0.02333	0.34527	-0.32194	0.1843
0.29173	0.35632	-0.06459	0.324025
0.33173	0.3751	-0.04337	0.353415
0.11828	0.39635	-0.27807	0.257315
0.09876	0.414	-0.31524	0.25638
0.15302	0.42484	-0.27182	0.28893
0.14577	0.43017	-0.2844	0.28797
0.19823	0.43299	-0.23476	0.31561
0.13353	0.43532	-0.30179	0.284425
0.10522	0.43919	-0.33397	0.272205
0.06857	0.45418	-0.38561	0.261375
0.11672	0.50289	-0.38617	0.309805
0.06708	0.58869	-0.52161	0.327885
0.27586	0.63536	-0.3595	0.45561
0.95157	0.5273	0.42427	0.739435
2.5508	0.75331	1.79749	1.65206
4.93588	2.09676	2.83912	3.51632
7.41369	4.20247	3.21122	5.80808
9.67027	6.59844	3.07183	8.13435
11.7734	8.7635	3.00993	10.2685
13.7374	10.5006	3.23684	12.119
15.5605	11.962	3.59849	13.7613
17.2396	13.327	3.91262	15.2833
18.58	14.6062	3.97382	16.5931
19.2538	15.6923	3.56152	17.4731
19.109	16.4769	2.63212	17.7929
17.9549	16.794	1.16095	17.3745
15.9269	16.2871	-0.36021	16.107
13.6029	14.5688	-0.96594	14.0858
10.7038	11.5615	-0.85769	11.1327
7.37016	7.63794	-0.26778	7.50405
6.74411	3.6963	3.04781	5.2202
9.08521	2.90273	6.18248	5.99397
11.0228	5.87382	5.14896	8.4483
11.7453	8.54045	3.20482	10.1429
11.7255	9.89147	1.83401	10.8085
11.3143	9.91567	1.3986	10.615
10.7617	9.29575	1.46595	10.0287
10.375	8.73498	1.64007	9.55502
10.1968	8.60523	1.59158	9.40102
10.2084	8.94244	1.26594	9.57541
10.3657	9.53382	0.83191	9.94977
10.5749	10.1371	0.43789	10.356
10.9582	10.6486	0.30966	10.8034
11.416	11.0772	0.33874	11.2466
11.772	11.4404	0.33162	11.6062
12.1691	11.7396	0.42952	11.9543
12.5546	11.9629	0.59169	12.2587
12.727	12.0831	0.64387	12.405
12.6322	12.0908	0.54139	12.3615
12.4018	12.0046	0.39723	12.2032
12.1963	11.843	0.35334	12.0197
12.0027	11.6172	0.38554	11.8099
11.7307	11.3392	0.39157	11.5349
11.3549	11.0132	0.34169	11.1841
10.6775	10.6105	0.067	10.644
9.5399	10.0778	-0.5379	9.80885
8.16541	9.38887	-1.22346	8.77714
6.72829	8.53113	-1.80284	7.62971
5.26389	7.49202	-2.22813	6.37796
3.84504	6.41016	-2.56512	5.1276
3.37019	5.72743	-2.35724	4.54881
4.8536	6.00602	-1.15242	5.42981
7.38082	7.44969	-0.06887	7.41526
10.5021	9.97113	0.53092	10.2366
14.0402	13.3437	0.6965	13.6919
16.5735	16.9612	-0.38766	16.7673
18.0828	19.8131	-1.73037	18.9479
19.9672	20.9049	-0.93772	20.4361
21.2621	20.0781	1.18395	20.6701
20.514	18.2061	2.30789	19.36
17.9409	16.022	1.91897	16.9815
14.4529	13.5637	0.88923	14.0083
11.0464	10.7928	0.2536	10.9196
7.99464	7.77439	0.22025	7.88452
5.40614	4.8811	0.52504	5.14362
3.28748	2.73664	0.55084	3.01206
1.61479	1.55821	0.05658	1.5865
0.84772	0.99932	-0.1516	0.92352
1.28269	0.97788	0.30481	1.13028
1.71949	1.34466	0.37483	1.53207
1.9567	1.59145	0.36525	1.77408
1.82888	1.50496	0.32392	1.66692
1.42496	1.13737	0.28759	1.28117
1.00896	0.66678	0.34218	0.83787
0.68864	0.31844	0.3702	0.50354
0.43533	0.32222	0.11311	0.378775
0.22807	0.41888	-0.19081	0.323475
0.17213	0.45311	-0.28098	0.31262
0.22997	0.45188	-0.22191	0.340925
0.26712	0.44742	-0.1803	0.35727
0.33845	0.44588	-0.10743	0.392165
0.31425	0.43696	-0.12271	0.375605
0.29732	0.42452	-0.1272	0.36092
0.43892	0.43161	0.00731	0.435265
0.51925	0.48228	0.03697	0.500765
0.40585	0.57149	-0.16564	0.48867
0.25168	0.66091	-0.40923	0.456295
0.23599	0.71772	-0.48173	0.476855
0.29014	0.73446	-0.44432	0.5123
0.33035	0.71759	-0.38724	0.52397
0.32223	0.67638	-0.35415	0.499305
0.27482	0.62104	-0.34622	0.44793
0.18074	0.56483	-0.38409	0.372785
0.22021	0.52092	-0.30071	0.370565
0.16701	0.49388	-0.32687	0.330445
0.14211	0.47887	-0.33676	0.31049
0.17693	0.46857	-0.29164	0.32275
0.13155	0.45899	-0.32744	0.29527
0.10807	0.44998	-0.34191	0.279025
0.22251	0.44206	-0.21955	0.332285
0.29452	0.43472	-0.1402	0.36462
0.30308	0.42672	-0.12364	0.3649
0.21128	0.4164	-0.20512	0.31384
0.1849	0.40299	-0.21809	0.293945
0.14568	0.39332	-0.24764	0.2695
0.11341	0.40626	-0.29285	0.259835
0.24896	0.43852	-0.18956	0.34374
0.48213	0.43117	0.05096	0.45665
1.14612	0.47623	0.66989	0.811175
2.7321	1.13252	1.59958	1.93231
5.31934	2.46411	2.85523	3.89173
8.29503	4.3826	3.91243	6.33882
11.0667	6.80924	4.2575	8.93799
13.4477	9.41445	4.03328	11.4311
15.5342	11.6821	3.85204	13.6081
17.2214	13.3565	3.86487	15.2889
18.3081	14.5354	3.7727	16.4218
18.7578	15.3591	3.39861	17.0584
18.6333	15.8169	2.8164	17.2251
17.7695	15.7446	2.02485	16.7571
16.0358	14.9278	1.10801	15.4818
13.7508	13.2419	0.50886	13.4963
11.4204	10.7355	0.68491	11.078
8.94562	7.67075	1.27487	8.30818
7.55639	4.56325	2.99314	6.05982
9.70481	3.54988	6.15493	6.62735
12.5199	6.40168	6.11823	9.46079
13.7407	9.62558	4.11507	11.6831
13.4395	11.6192	1.82029	12.5293
12.434	11.9662	0.46787	12.2001
11.424	10.9217	0.50223	11.1728
10.6806	9.3088	1.37183	9.99471
10.1092	8.07638	2.03284	9.0928
9.77335	7.68819	2.08516	8.73077
9.67998	8.03121	1.64877	8.8556
9.68747	8.70741	0.98006	9.19744
9.79363	9.36437	0.42926	9.579
9.93803	9.86651	0.07152	9.90227
10.128	10.2382	-0.11023	10.1831
10.4559	10.5437	-0.0878	10.4998
10.8656	10.814	0.05164	10.8398
11.1381	11.0383	0.09975	11.0882
11.1739	11.1849	-0.01102	11.1794
10.9646	11.2294	-0.26479	11.097
10.6315	11.1655	-0.53399	10.8985
10.3235	10.9839	-0.66043	10.6537
9.85956	10.6718	-0.81227	10.2657
9.07331	10.2502	-1.17685	9.66174
8.13699	9.77827	-1.64128	8.95763
7.22803	9.30683	-2.0788	8.26743
6.32819	8.83344	-2.50525	7.58081
5.56257	8.35006	-2.78749	6.95632
5.13654	7.96342	-2.82688	6.54998
5.17569	7.8814	-2.70571	6.52855
5.75317	8.22948	-2.47631	6.99132
6.84557	8.98494	-2.13937	7.91526
8.51875	10.1017	-1.58293	9.31021
10.3606	11.4852	-1.12464	10.9229
11.7007	12.8214	-1.12072	12.261
11.7053	13.5701	-1.86481	12.6377
12.1656	13.3105	-1.14486	12.738
15.859	12.5493	3.30979	14.2041
18.6824	12.7192	5.96325	15.7008
18.3956	13.7853	4.61023	16.0904
16.2013	14.1154	2.08592	15.1583
13.4881	12.7764	0.71172	13.1323
10.4766	9.87973	0.59683	10.1781
7.44363	6.32305	1.12058	6.88334
4.75888	3.33554	1.42334	4.04721
2.49232	1.64561	0.84671	2.06896
0.73158	1.08255	-0.35097	0.907065
0.7541	1.03208	-0.27798	0.89309
1.56479	1.22431	0.34048	1.39455
1.82146	1.40869	0.41277	1.61508
1.63922	1.38374	0.25548	1.51148
1.34591	1.14413	0.20178	1.24502
1.05227	0.80678	0.24549	0.929525
0.77522	0.52861	0.24661	0.651915
0.61951	0.41681	0.2027	0.51816
0.43787	0.40379	0.03408	0.42083
0.16726	0.40353	-0.23627	0.285395
0.3014	0.41096	-0.10956	0.35618
0.32134	0.42658	-0.10524	0.37396
0.30833	0.43752	-0.12919	0.372925
0.25096	0.42841	-0.17745	0.339685
0.17533	0.40159	-0.22626	0.28846
0.28335	0.37785	-0.0945	0.3306
0.46815	0.37804	0.09011	0.423095
0.44731	0.41233	0.03498	0.42982
0.21703	0.46989	-0.25286	0.34346
0.11159	0.52897	-0.41738	0.32028
0.20273	0.576	-0.37327	0.389365
0.20466	0.60626	-0.4016	0.40546
0.20629	0.61591	-0.40962	0.4111
0.15971	0.60148	-0.44177	0.380595
0.11721	0.56783	-0.45062	0.34252
0.23343	0.52718	-0.29375	0.380305
0.23997	0.48875	-0.24878	0.36436
0.18121	0.45593	-0.27472	0.31857
0.33565	0.42916	-0.09351	0.382405
0.14961	0.40814	-0.25853	0.278875
0.45734	0.39527	0.06207	0.426305
0.25912	0.39456	-0.13544	0.32684
0.19498	0.40462	-0.20964	0.2998
0.20866	0.41767	-0.20901	0.313165
0.14929	0.42679	-0.2775	0.28804
0.22442	0.42981	-0.20539	0.327115
0.20332	0.42756	-0.22424	0.31544
0.1689	0.42154	-0.25264	0.29522
0.10259	0.41253	-0.30994	0.25756
0.06366	0.40083	-0.33717	0.232245
0.10218	0.38908	-0.2869	0.24563
0.16085	0.3866	-0.22575	0.273725
0.11508	0.41672	-0.30164	0.2659
0.05366	0.50687	-0.45321	0.280265
0.10699	0.6262	-0.51921	0.366595
0.46846	0.64339	-0.17493	0.555925
1.773	0.54174	1.23126	1.15737
4.14911	1.36621	2.7829	2.75766
7.01692	3.32902	3.6879	5.17297
9.55113	5.98112	3.57001	7.76613
11.6029	8.71706	2.88581	10.16
13.4002	10.8879	2.51232	12.144
14.9845	12.249	2.73549	13.6168
16.1874	13.0227	3.16473	14.605
16.9694	13.5301	3.43935	15.2498
17.1606	13.9046	3.25601	15.5326
16.7257	14.0843	2.64139	15.405
15.8013	13.9524	1.84886	14.8769
14.2813	13.399	0.88232	13.8402
12.2853	12.2232	0.06211	12.2542
10.2854	10.1637	0.12177	10.2245
8.32935	7.20299	1.12636	7.76617
7.3219	3.95822	3.36368	5.64006
9.0191	3.09166	5.92744	6.05538
11.3827	5.61708	5.76566	8.49991
12.6284	8.21983	4.40859	10.4241
12.6694	9.91612	2.75328	11.2928
11.9673	10.2947	1.67259	11.131
10.9561	9.57596	1.38012	10.266
9.95689	8.53839	1.4185	9.24764
9.1674	7.80399	1.36341	8.48569
8.67346	7.52623	1.14723	8.09985
8.54294	7.60394	0.939	8.07344
8.60092	7.90171	0.69921	8.25131
8.66205	8.32066	0.34139	8.49136
8.78459	8.78085	0.00374	8.78272
9.0847	9.21039	-0.12569	9.14755
9.5059	9.5612	-0.0553	9.53355
9.83692	9.82819	0.00873	9.83255
10.1553	10.034	0.12125	10.0946
10.4627	10.1937	0.26899	10.3282
10.5744	10.3085	0.26591	10.4414
10.4635	10.3688	0.09473	10.4162
10.3871	10.3561	0.03097	10.3716
10.4777	10.2496	0.22812	10.3637
10.3204	10.0408	0.27965	10.1806
9.74028	9.74689	-0.00661	9.74358
8.83087	9.38521	-0.55434	9.10804
7.75733	8.9501	-1.19277	8.35372
6.74285	8.44286	-1.70001	7.59286
5.59889	7.877	-2.27811	6.73794
4.47585	7.30718	-2.83133	5.89152
4.01098	6.94972	-2.93874	5.48035
4.50368	7.12308	-2.6194	5.81338
5.73845	7.92196	-2.18351	6.83021
7.64172	9.18938	-1.54766	8.41555
10.3003	10.8214	-0.5211	10.5609
12.8332	12.7804	0.05288	12.8068
14.2492	14.8603	-0.61106	14.5548
16.1845	16.5146	-0.33018	16.3496
19.224	17.1003	2.12368	18.1622
20.1526	16.6874	3.46518	18.42
18.721	15.8896	2.83146	17.3053
16.0455	14.3887	1.65678	15.2171
12.9523	11.6579	1.2944	12.3051
9.7867	8.29491	1.49179	9.0408
6.6776	5.19812	1.47948	5.93786
4.02789	2.88648	1.14141	3.45718
2.02183	1.60231	0.41952	1.81207
0.79353	1.12069	-0.32716	0.95711
1.21721	1.0131	0.20411	1.11515
1.5537	1.21049	0.34321	1.3821
1.7026	1.47789	0.22471	1.59024
1.67949	1.54347	0.13602	1.61148
1.45773	1.32035	0.13738	1.38904
1.26531	0.90383	0.36148	1.08457
0.8845	0.5022	0.3823	0.69335
0.4772	0.36025	0.11695	0.418725
0.28516	0.41891	-0.13375	0.352035
0.23031	0.43509	-0.20478	0.3327
0.28765	0.39745	-0.1098	0.34255
0.15881	0.36097	-0.20216	0.25989
0.15003	0.35503	-0.205	0.25253
0.26813	0.37634	-0.10821	0.322235
0.27908	0.40956	-0.13048	0.34432
0.27203	0.44481	-0.17278	0.35842
0.3571	0.48554	-0.12844	0.42132
0.41881	0.54051	-0.1217	0.47966
0.39225	0.60425	-0.212	0.49825
0.35766	0.65337	-0.29571	0.505515
0.30286	0.67227	-0.36941	0.487565
0.19806	0.66505	-0.46699	0.431555
0.10594	0.64067	-0.53473	0.373305
0.07898	0.6027	-0.52372	0.34084
0.11121	0.55376	-0.44255	0.332485
0.21861	0.50233	-0.28372	0.36047
0.26279	0.45964	-0.19685	0.361215
0.13591	0.43125	-0.29534	0.28358
0.09551	0.41668	-0.32117	0.256095
0.09822	0.4125	-0.31428	0.25536
0.16224	0.4137	-0.25146	0.28797
0.17031	0.41569	-0.24538	0.293
0.05585	0.41577	-0.35992	0.23581
0.11165	0.41421	-0.30256	0.26293
0.17025	0.41384	-0.24359	0.292045
0.17653	0.41717	-0.24064	0.29685
0.17418	0.42428	-0.2501	0.29923
0.21423	0.43315	-0.21892	0.32369
0.13231	0.44219	-0.30988	0.28725
0.03677	0.45493	-0.41816	0.24585
0.09613	0.4845	-0.38837	0.290315
0.13944	0.54482	-0.40538	0.34213
0.21165	0.61847	-0.40682	0.41506
0.4093	0.63486	-0.22556	0.52208
1.19753	0.59001	0.60752	0.89377
3.00787	0.98462	2.02325	1.99625
5.3842	2.07497	3.30923	3.72959
7.42414	3.63084	3.7933	5.52749
9.0563	5.50317	3.55313	7.27974
10.5185	7.41714	3.10136	8.96782
11.9489	8.98694	2.96195	10.4679
13.3176	10.066	3.2516	11.6918
14.5526	10.8575	3.69505	12.7051
15.6934	11.6431	4.05027	13.6683
16.4268	12.5194	3.90737	14.4731
16.5505	13.3668	3.18375	14.9587
16.0799	13.9479	2.13198	15.0139
14.8774	13.9725	0.90494	14.425
13.0671	13.2263	-0.15916	13.1467
11.1696	11.699	-0.52934	11.4343
9.05376	9.43492	-0.38116	9.24434
6.96905	6.4275	0.54155	6.69828
7.34122	3.3463	3.99492	5.34376
9.30168	4.06603	5.23565	6.68385
10.5372	7.28402	3.25314	8.91059
10.6982	9.46574	1.23244	10.082
10.061	9.98508	0.07592	10.023
9.04919	9.32442	-0.27523	9.1868
8.19703	8.30966	-0.11263	8.25334
7.80997	7.52498	0.28499	7.66747
7.82848	7.20604	0.62244	7.51726
7.98398	7.38619	0.59779	7.68508
8.26815	7.98061	0.28754	8.12438
8.66728	8.79323	-0.12595	8.73025
9.11355	9.60691	-0.49336	9.36023
9.7512	10.2923	-0.54109	10.0217
10.5526	10.8326	-0.28001	10.6926
11.3061	11.2609	0.04522	11.2835
11.8984	11.5986	0.29982	11.7485
12.2981	11.8652	0.43286	12.0816
12.5039	12.0764	0.42755	12.2902
12.5868	12.2167	0.37014	12.4018
12.6091	12.2541	0.35501	12.4316
12.6177	12.1609	0.45687	12.3893
12.3799	11.9188	0.46117	12.1493
11.6218	11.5344	0.08736	11.5781
10.7581	11.0407	-0.2826	10.8994
10.1457	10.4651	-0.3194	10.3054
9.35009	9.78095	-0.43086	9.56552
8.04237	8.91729	-0.87492	8.47983
6.52724	7.88226	-1.35502	7.20475
5.04926	6.86576	-1.8165	5.95751
3.88008	6.17177	-2.29169	5.02592
3.63708	6.01903	-2.38195	4.82805
4.72829	6.49999	-1.7717	5.61414
6.82428	7.69129	-0.86701	7.25779
9.97109	9.64884	0.32225	9.80997
13.4402	12.3536	1.08655	12.8969
15.8992	15.4694	0.42981	15.6843
18.2284	18.2376	-0.00914	18.233
21.0507	19.81	1.24067	20.4304
22.1729	19.645	2.5279	20.9089
20.8811	17.92	2.96106	19.4006
17.9752	15.4026	2.57263	16.6889
14.3678	12.348	2.01976	13.3579
10.5344	8.72661	1.80778	9.6305
7.00389	5.25998	1.74391	6.13194
4.24679	2.79466	1.45213	3.52072
2.34284	1.64178	0.70106	1.99231
0.94096	1.37419	-0.43323	1.15758
0.78418	1.23561	-0.45143	1.00989
1.26184	1.17181	0.09003	1.21683
1.71291	1.2915	0.42141	1.50221
2.19432	1.4133	0.78102	1.80381
1.80405	1.3591	0.44495	1.58157
1.09994	1.09472	0.00522	1.09733
1.02728	0.71076	0.31652	0.86902
0.96813	0.37876	0.58937	0.673445
0.71349	0.29595	0.41754	0.50472
0.45086	0.36493	0.08593	0.407895
0.31959	0.39854	-0.07895	0.359065
0.55042	0.4015	0.14892	0.47596
0.50445	0.40952	0.09493	0.456985
0.42423	0.43103	-0.0068	0.42763
0.48032	0.45452	0.0258	0.46742
0.50956	0.4691	0.04046	0.48933
0.5273	0.47634	0.05096	0.50182
0.42292	0.4846	-0.06168	0.45376
0.22995	0.50009	-0.27014	0.36502
0.17087	0.52082	-0.34995	0.345845
0.2266	0.53631	-0.30971	0.381455
0.25711	0.54333	-0.28622	0.40022
0.18235	0.55233	-0.36998	0.36734
0.09805	0.57117	-0.47312	0.33461
0.13716	0.59235	-0.45519	0.364755
0.32345	0.60051	-0.27706	0.46198
0.35068	0.58882	-0.23814	0.46975
0.23702	0.56034	-0.32332	0.39868
0.29512	0.51833	-0.22321	0.406725
0.38163	0.46526	-0.08363	0.423445
0.12147	0.40795	-0.28648	0.26471
0.36079	0.35784	0.00295	0.359315
0.33719	0.32397	0.01322	0.33058
0.2436	0.30781	-0.06421	0.275705
0.25677	0.30766	-0.05089	0.282215
0.23655	0.3231	-0.08655	0.279825
0.21638	0.35604	-0.13966	0.28621
0.208	0.40979	-0.20179	0.308895
0.04886	0.48325	-0.43439	0.266055
0.17974	0.55868	-0.37894	0.36921
0.251	0.58079	-0.32979	0.415895
0.79452	0.52806	0.26646	0.66129
2.23573	0.95847	1.27726	1.5971
4.71254	2.31135	2.40119	3.51194
7.59775	4.2695	3.32825	5.93362
10.1668	6.48243	3.68435	8.32461
12.3276	8.71243	3.61517	10.52
14.1932	10.7426	3.4506	12.4679
15.6764	12.3168	3.35956	13.9966
16.7904	13.3725	3.41792	15.0814
17.5443	14.0817	3.46265	15.813
17.6537	14.5873	3.06641	16.1205
16.9648	14.8179	2.14686	15.8914
15.4147	14.4868	0.92786	14.9507
13.2618	13.2532	0.00861	13.2575
10.901	10.9595	-0.05843	10.9303
8.27692	7.77883	0.49809	8.02787
6.40429	4.31469	2.0896	5.35949
7.50193	2.35258	5.14935	4.92725
9.62239	4.32801	5.29438	6.9752
10.714	6.81206	3.9019	8.76301
10.7235	8.3049	2.41861	9.51421
10.2239	8.61099	1.61287	9.41742
9.65149	8.17817	1.47332	8.91483
9.2238	7.56321	1.66059	8.39351
9.04068	7.1496	1.89108	8.09514
9.10426	7.14183	1.96243	8.12304
9.29721	7.56509	1.73212	8.43115
9.60215	8.26691	1.33524	8.93453
9.99405	9.00062	0.99343	9.49733
10.2295	9.59549	0.63404	9.91251
10.3546	10.0303	0.3243	10.1924
10.5788	10.3682	0.21056	10.4735
10.9569	10.665	0.29192	10.811
11.3636	10.9209	0.44273	11.1423
11.5011	11.0983	0.40279	11.2997
11.3167	11.1571	0.15954	11.2369
11.0194	11.0798	-0.06041	11.0496
10.7154	10.8835	-0.16811	10.7995
10.3914	10.608	-0.21657	10.4997
9.98597	10.2979	-0.31197	10.142
9.35779	9.97691	-0.61912	9.66735
8.37109	9.63535	-1.26426	9.00322
7.26764	9.25362	-1.98598	8.26063
6.34889	8.79582	-2.44693	7.57235
5.43082	8.24241	-2.81159	6.83662
4.6047	7.71327	-3.10857	6.15898
4.30006	7.46303	-3.16297	5.88155
4.73449	7.66464	-2.93015	6.19956
5.64858	8.30497	-2.65639	6.97677
7.18366	9.38139	-2.19773	8.28252
9.70517	10.9525	-1.24728	10.3288
12.0923	12.8505	-0.7582	12.4714
12.8657	14.4673	-1.60165	13.6665
13.1	15.0511	-1.95102	14.0756
15.4807	14.5103	0.97045	14.9955
18.2234	13.7217	4.50175	15.9725
18.3944	13.345	5.04943	15.8697
16.5311	12.9509	3.58028	14.741
13.9075	11.8143	2.09317	12.8609
10.9159	9.54309	1.37281	10.2295
7.87307	6.48956	1.38351	7.18131
5.35988	3.64487	1.71501	4.50238
3.38723	1.76295	1.62428	2.57509
1.68854	0.97199	0.71655	1.33027
0.44661	0.88987	-0.44326	0.66824
1.0691	1.02564	0.04346	1.04737
1.66128	1.19534	0.46594	1.42831
1.80684	1.28934	0.5175	1.54809
1.72542	1.24829	0.47713	1.48685
1.49258	1.06854	0.42404	1.28056
1.09734	0.80568	0.29166	0.95151
0.70673	0.53885	0.16788	0.62279
0.42328	0.31883	0.10445	0.371055
0.28357	0.22647	0.0571	0.25502
0.26238	0.28797	-0.02559	0.275175
0.36467	0.35917	0.0055	0.36192
0.44104	0.40545	0.03559	0.423245
0.41765	0.44116	-0.02351	0.429405
0.30267	0.469	-0.16633	0.385835
0.35433	0.48096	-0.12663	0.417645
0.42632	0.47811	-0.05179	0.452215
0.49634	0.47821	0.01813	0.487275
0.46703	0.49224	-0.02521	0.479635
0.2877	0.51234	-0.22464	0.40002
0.16108	0.5286	-0.36752	0.34484
0.16124	0.53842	-0.37718	0.34983
0.15112	0.54394	-0.39282	0.34753
0.17469	0.54706	-0.37237	0.360875
0.22673	0.54827	-0.32154	0.3875
0.24514	0.54777	-0.30263	0.396455
0.22957	0.54557	-0.316	0.38757
0.24319	0.54103	-0.29784	0.39211
0.19606	0.53181	-0.33575	0.363935
0.28388	0.51427	-0.23039	0.399075
0.21868	0.48645	-0.26777	0.352565
0.13739	0.45096	-0.31357	0.294175
0.2186	0.41543	-0.19683	0.317015
0.22724	0.38815	-0.16091	0.307695
0.20816	0.37365	-0.16549	0.290905
0.14162	0.37299	-0.23137	0.257305
0.15569	0.38271	-0.22702	0.2692
0.14757	0.39583	-0.24826	0.2717
0.19802	0.41401	-0.21599	0.306015
0.13768	0.45419	-0.31651	0.295935
0.21207	0.50067	-0.2886	0.35637
0.62906	0.45531	0.17375	0.542185
1.77787	0.45731	1.32056	1.11759
3.93772	1.40969	2.52803	2.6737
6.82081	3.23147	3.58934	5.02614
9.65337	5.56139	4.09198	7.60738
12.0513	7.94622	4.10511	9.99878
14.0901	10.1119	3.97821	12.101
15.6945	11.9449	3.74959	13.8197
16.8587	13.3274	3.53129	15.093
17.624	14.2114	3.41267	15.9177
17.9297	14.6574	3.27231	16.2935
17.6521	14.7167	2.93541	16.1844
16.6711	14.3308	2.34027	15.501
14.8109	13.3526	1.45824	14.0817
12.3171	11.6908	0.62627	12.004
9.47366	9.3237	0.14996	9.39868
6.63733	6.30145	0.33588	6.46939
6.38726	3.15238	3.23488	4.76982
8.3422	2.39921	5.94299	5.37071
9.52273	4.65757	4.86516	7.09015
9.49282	6.60914	2.88368	8.05098
9.03186	7.45406	1.5778	8.24296
8.63116	7.30875	1.32241	7.96995
8.27851	6.84177	1.43674	7.56014
8.03709	6.6056	1.43149	7.32134
8.06527	6.78776	1.27751	7.42652
8.42548	7.35155	1.07393	7.88851
9.0137	8.12263	0.89107	8.56817
9.58879	8.89822	0.69057	9.2435
10.082	9.58345	0.49856	9.83273
10.5909	10.1806	0.41035	10.3857
11.141	10.686	0.45506	10.9135
11.7353	11.0703	0.66501	11.4028
12.227	11.3174	0.90959	11.7722
12.4635	11.4472	1.0163	11.9554
12.5243	11.5019	1.0224	12.0131
12.4428	11.5102	0.9326	11.9765
12.3308	11.477	0.85386	11.9039
12.267	11.3938	0.87324	11.8304
12.0714	11.2471	0.82423	11.6592
11.6091	11.0187	0.59038	11.3139
10.8867	10.6658	0.22093	10.7763
9.90744	10.1226	-0.21511	10.015
8.81483	9.36408	-0.54925	9.08946
7.6832	8.46041	-0.77721	8.0718
6.28659	7.55609	-1.2695	6.92134
4.77974	6.78217	-2.00243	5.78096
3.75614	6.24463	-2.48849	5.00038
3.86144	6.1263	-2.26486	4.99387
5.30417	6.64531	-1.34114	5.97474
7.4146	7.97684	-0.56224	7.69572
10.1704	10.1779	-0.00748	10.1742
13.4432	12.9925	0.45072	13.2179
16.4862	15.8417	0.64447	16.1639
18.7949	18.0686	0.72627	18.4318
20.4216	19.2309	1.19066	19.8263
20.846	19.1785	1.66754	20.0122
19.677	18.1547	1.52232	18.9158
17.126	16.7487	0.37724	16.9374
13.9152	14.8915	-0.97631	14.4034
10.5237	11.8669	-1.34313	11.1953
7.30823	7.88594	-0.57771	7.59708
4.64385	4.18074	0.46311	4.4123
2.62589	1.87079	0.7551	2.24834
1.16773	1.26852	-0.10079	1.21813
0.93373	1.22001	-0.28628	1.07687
1.299	1.14989	0.14911	1.22445
1.59168	1.18472	0.40696	1.3882
1.8673	1.24607	0.62123	1.55668
1.76297	1.20438	0.55859	1.48367
1.05878	1.02691	0.03187	1.04285
0.4911	0.76496	-0.27386	0.62803
0.34969	0.50817	-0.15848	0.42893
0.19394	0.32931	-0.13537	0.261625
0.68388	0.27636	0.40752	0.48012
0.7154	0.29651	0.41889	0.505955
0.43364	0.31313	0.12051	0.373385
0.3687	0.32721	0.04149	0.347955
0.39847	0.35223	0.04624	0.37535
0.28412	0.38952	-0.1054	0.33682
0.15188	0.43148	-0.2796	0.29168
0.31356	0.46765	-0.15409	0.390605
0.50844	0.49502	0.01342	0.50173
0.25907	0.51977	-0.2607	0.38942
0.05448	0.5463	-0.49182	0.30039
0.19849	0.56393	-0.36544	0.38121
0.15188	0.56051	-0.40863	0.356195
0.14902	0.54249	-0.39347	0.345755
0.23883	0.527	-0.28817	0.382915
0.24216	0.52129	-0.27913	0.381725
0.24005	0.51729	-0.27724	0.37867
0.28632	0.50532	-0.219	0.39582
0.28884	0.48611	-0.19727	0.387475
0.07196	0.46716	-0.3952	0.26956
0.07326	0.45384	-0.38058	0.26355
0.0955	0.44612	-0.35062	0.27081
0.32062	0.44004	-0.11942	0.38033
0.3166	0.43063	-0.11403	0.373615
0.05199	0.41511	-0.36312	0.23355
0.21708	0.39712	-0.18004	0.3071
0.23349	0.3884	-0.15491	0.310945
0.18727	0.39862	-0.21135	0.292945
0.12933	0.42161	-0.29228	0.27547
0.15351	0.44102	-0.28751	0.297265
0.23998	0.45043	-0.21045	0.345205
0.18227	0.46362	-0.28135	0.322945
0.20635	0.49856	-0.29221	0.352455
0.41816	0.53712	-0.11896	0.47764
0.48036	0.5044	-0.02404	0.49238
0.86573	0.4469	0.41883	0.656315
2.31573	1.08298	1.23275	1.69935
4.79556	2.50838	2.28718	3.65197
7.37773	4.38263	2.9951	5.88018
9.41957	6.34898	3.07059	7.88428
11.1141	8.1947	2.91941	9.65441
12.8439	9.81623	3.02765	11.3301
14.5143	11.1279	3.38642	12.8211
15.9416	12.1847	3.75692	14.0632
17.1311	13.1732	3.95794	15.1521
17.8954	14.1859	3.70951	16.0407
18.0209	15.0729	2.94804	16.5469
17.3834	15.4765	1.90694	16.43
15.8527	15.0305	0.82226	15.4416
13.7944	13.5365	0.25794	13.6654
11.3987	11.0274	0.37132	11.2131
8.30898	7.80797	0.50101	8.05847
6.31482	4.35477	1.96005	5.33479
7.41772	2.21799	5.19973	4.81785
9.0544	4.47485	4.57955	6.76462
9.76888	7.07528	2.6936	8.42208
9.63488	8.55207	1.08281	9.09348
9.2256	8.91075	0.31485	9.06818
8.87138	8.55215	0.31923	8.71176
8.58467	7.99022	0.59445	8.28744
8.54902	7.66561	0.88341	8.10731
8.88974	7.80418	1.08556	8.34696
9.48063	8.39492	1.08571	8.93778
10.061	9.22436	0.83667	9.64269
10.4646	10.0313	0.43331	10.248
10.7934	10.6717	0.12171	10.7326
11.2264	11.1449	0.08157	11.1857
11.7378	11.5098	0.22796	11.6238
12.2116	11.7986	0.41298	12.0051
12.5646	12.004	0.56056	12.2843
12.786	12.1082	0.67787	12.4471
12.839	12.1104	0.72862	12.4747
12.7253	12.0366	0.68875	12.3809
12.589	11.9148	0.67427	12.2519
12.4606	11.7531	0.70759	12.1069
12.1414	11.5468	0.59454	11.8441
11.7123	11.2911	0.42123	11.5017
11.4012	10.9697	0.43154	11.1854
10.8818	10.5244	0.35741	10.7031
9.86985	9.85963	0.01022	9.86474
8.5716	8.92111	-0.34951	8.74636
7.06829	7.76773	-0.69944	7.41801
5.10873	6.5537	-1.44497	5.83122
2.98211	5.459	-2.47689	4.22056
2.33507	4.85064	-2.51557	3.59286
4.02715	5.5006	-1.47345	4.76388
6.61571	7.63229	-1.01658	7.124
10.4013	10.742	-0.34077	10.5716
15.1286	14.5534	0.57517	14.841
19.0974	18.8555	0.24189	18.9765
22.1406	22.7869	-0.6463	22.4637
23.9837	24.9428	-0.95908	24.4632
23.3451	24.5855	-1.24038	23.9653
20.6523	22.1376	-1.48532	21.395
17.1329	18.3136	-1.18075	17.7232
13.3199	13.8451	-0.52519	13.5825
9.41531	9.62667	-0.21136	9.52099
6.04606	6.096	-0.04994	6.07103
3.49453	3.29177	0.20276	3.39315
1.7179	1.40324	0.31466	1.56057
0.75577	0.89634	-0.14057	0.826055
1.40147	1.26274	0.13873	1.3321
2.16697	1.57688	0.59009	1.87193
2.26148	1.75166	0.50982	2.00657
1.92838	1.72111	0.20727	1.82475
1.46875	1.43295	0.0358	1.45085
0.96327	0.96348	-0.00021	0.963375
0.55702	0.50182	0.0552	0.52942
0.408	0.31851	0.08949	0.363255
0.30036	0.4032	-0.10284	0.35178
0.21115	0.44165	-0.2305	0.3264
0.37294	0.42042	-0.04748	0.39668
0.51495	0.40375	0.1112	0.45935
0.38195	0.42037	-0.03842	0.40116
0.16258	0.44958	-0.287	0.30608
0.17309	0.4648	-0.29171	0.318945
0.25711	0.4691	-0.21199	0.363105
0.22175	0.48295	-0.2612	0.35235
0.25514	0.51346	-0.25832	0.3843
0.21961	0.54045	-0.32084	0.38003
0.19039	0.54495	-0.35456	0.36767
0.2493	0.53696	-0.28766	0.39313
0.26269	0.54122	-0.27853	0.401955
0.23894	0.56843	-0.32949	0.403685
0.26573	0.60458	-0.33885	0.435155
0.2407	0.62504	-0.38434	0.43287
0.27096	0.61762	-0.34666	0.44429
0.26717	0.5864	-0.31923	0.426785
0.1773	0.53823	-0.36093	0.357765
0.1075	0.47766	-0.37016	0.29258
0.28932	0.41175	-0.12243	0.350535
0.26125	0.35254	-0.09129	0.306895
0.08655	0.31305	-0.2265	0.1998
0.27359	0.30116	-0.02757	0.287375
0.2929	0.31866	-0.02576	0.30578
0.30726	0.36026	-0.053	0.33376
0.21916	0.40974	-0.19058	0.31445
0.10046	0.44596	-0.3455	0.27321
0.11521	0.45951	-0.3443	0.28736
0.11418	0.46033	-0.34615	0.287255
0.08258	0.46726	-0.38468	0.27492
0.15995	0.4846	-0.32465	0.322275
0.24033	0.47945	-0.23912	0.35989
0.58088	0.41314	0.16774	0.49701
1.56806	0.51133	1.05673	1.0397
3.47755	1.25389	2.22366	2.36572
5.67069	2.6154	3.05529	4.14304
7.39474	4.39116	3.00358	5.89295
8.65483	6.19976	2.45507	7.4273
9.6692	7.66447	2.00473	8.66683
10.6389	8.60331	2.03556	9.62109
11.6755	9.09754	2.57798	10.3865
12.7063	9.41436	3.29194	11.0603
13.7043	9.83422	3.87004	11.7692
14.5421	10.5146	4.02755	12.5283
14.9324	11.3889	3.54355	13.1607
14.7028	12.1844	2.51842	13.4436
13.7074	12.5534	1.15397	13.1304
12.031	12.1268	-0.0958	12.0789
10.235	10.6185	-0.38349	10.4268
8.5204	8.04649	0.47391	8.28345
6.83757	4.83407	2.0035	5.83582
7.0099	2.23116	4.77874	4.62053
9.34774	3.58793	5.75981	6.46784
11.384	6.36352	5.02046	8.87375
12.0548	8.59503	3.4598	10.3249
11.5999	9.65618	1.94369	10.628
10.7338	9.52365	1.21016	10.1287
9.99271	8.75302	1.23969	9.37287
9.50677	7.92605	1.58072	8.71641
9.2085	7.37383	1.83467	8.29116
8.97228	7.21866	1.75362	8.09547
8.79579	7.42073	1.37506	8.10826
8.80105	7.84614	0.95491	8.3236
9.08626	8.34975	0.73651	8.718
9.60433	8.83496	0.76937	9.21964
10.0738	9.25551	0.8183	9.66466
10.4364	9.5985	0.83794	10.0175
10.7208	9.86394	0.8569	10.2924
10.8413	10.042	0.79923	10.4416
10.8733	10.1211	0.75222	10.4972
10.8997	10.0896	0.81009	10.4946
10.8379	9.93263	0.90528	10.3853
10.623	9.64995	0.97309	10.1365
10.1423	9.26298	0.8793	9.70263
9.30984	8.79889	0.51095	9.05437
8.33098	8.25793	0.07305	8.29445
7.30161	7.61578	-0.31417	7.4587
6.07789	6.88203	-0.80414	6.47996
4.63104	6.0926	-1.46156	5.36182
3.1526	5.31072	-2.15812	4.23166
2.71532	4.81536	-2.10004	3.76534
4.105	5.15185	-1.04685	4.62843
6.52775	6.64465	-0.1169	6.5862
10.2967	9.29113	1.00559	9.79393
15.3901	13.1095	2.28056	14.2498
19.6771	17.8225	1.85456	18.7498
21.9624	22.5009	-0.53853	22.2317
22.2848	25.695	-3.41021	23.9899
20.7696	25.9722	-5.20264	23.3709
17.9453	23.0113	-5.06604	20.4783
14.4561	18.2766	-3.82044	16.3663
11.0176	13.6579	-2.64032	12.3377
7.809	9.63268	-1.82368	8.72084
4.90491	5.99369	-1.08878	5.4493
2.74688	3.07929	-0.33241	2.91308
1.21254	1.4588	-0.24626	1.33567
1.09224	1.20383	-0.11159	1.14804
1.60963	1.28251	0.32712	1.44607
1.69795	1.33432	0.36363	1.51614
1.65324	1.3633	0.28994	1.50827
1.46319	1.27656	0.18663	1.36987
1.18738	1.03743	0.14995	1.11241
0.83625	0.69303	0.14322	0.76464
0.49641	0.36865	0.12776	0.43253
0.31663	0.27849	0.03814	0.29756
0.31697	0.3535	-0.03653	0.335235
0.31143	0.38976	-0.07833	0.350595
0.28938	0.3948	-0.10542	0.34209
0.31931	0.4141	-0.09479	0.366705
0.31496	0.44741	-0.13245	0.381185
0.21214	0.4701	-0.25796	0.34112
0.27961	0.48263	-0.20302	0.38112
0.18589	0.50103	-0.31514	0.34346
0.2663	0.53016	-0.26386	0.39823
0.16203	0.56042	-0.39839	0.361225
0.08895	0.58248	-0.49353	0.335715
0.21621	0.59477	-0.37856	0.40549
0.32598	0.59997	-0.27399	0.462975
0.34192	0.6042	-0.26228	0.47306
0.24252	0.61608	-0.37356	0.4293
0.16749	0.63805	-0.47056	0.40277
0.19275	0.65892	-0.46617	0.425835
0.30353	0.66118	-0.35765	0.482355
0.31217	0.63819	-0.32602	0.47518
0.15461	0.59714	-0.44253	0.375875
0.03272	0.54807	-0.51535	0.290395
0.10313	0.49952	-0.39639	0.301325
0.11533	0.45878	-0.34345	0.287055
0.086	0.43024	-0.34424	0.25812
0.09627	0.41762	-0.32135	0.256945
0.18585	0.42473	-0.23888	0.30529
0.26233	0.45043	-0.1881	0.35638
0.11278	0.488	-0.37522	0.30039
0.06447	0.52785	-0.46338	0.29616
0.21823	0.55723	-0.339	0.38773
0.09014	0.56814	-0.478	0.32914
0.11985	0.57441	-0.45456	0.34713
0.16721	0.60524	-0.43803	0.386225
0.19609	0.65372	-0.45763	0.424905
0.48713	0.63324	-0.14611	0.560185
1.58731	0.51823	1.06908	1.05277
3.4958	1.0607	2.4351	2.27825
5.78012	2.52926	3.25086	4.15469
7.75319	4.51077	3.24242	6.13198
9.17316	6.52653	2.64663	7.84985
10.3678	8.10667	2.26111	9.23722
11.5817	9.12727	2.45443	10.3545
12.8399	9.85458	2.98529	11.3472
14.1404	10.6154	3.52504	12.3779
15.2325	11.5023	3.73019	13.3674
15.9983	12.3925	3.60583	14.1954
16.3955	13.1205	3.27491	14.758
16.0452	13.4872	2.55795	14.7662
14.6773	13.2345	1.44273	13.9559
12.6823	12.2086	0.47373	12.4454
10.5898	10.3896	0.20021	10.4897
8.0928	7.81056	0.28224	7.95168
6.27947	4.73886	1.54061	5.50916
7.51918	2.22955	5.28963	4.87437
9.49532	3.61104	5.88428	6.55318
10.2975	6.33963	3.95792	8.31859
10.1129	8.1799	1.93305	9.14643
9.58299	8.82428	0.75871	9.20364
8.98209	8.68847	0.29362	8.83528
8.56137	8.28706	0.27431	8.42422
8.42106	7.98042	0.44064	8.20074
8.45616	7.98512	0.47104	8.22064
8.62664	8.32137	0.30527	8.47401
8.92391	8.83004	0.09387	8.87697
9.31273	9.35605	-0.04332	9.33439
9.68795	9.84481	-0.15686	9.76638
10.0059	10.2724	-0.26653	10.1392
10.3889	10.6026	-0.2137	10.4958
10.8268	10.8115	0.01526	10.8191
11.0535	10.914	0.13953	10.9838
11.0624	10.955	0.10745	11.0087
11.1633	10.9749	0.18843	11.0691
11.4088	10.9926	0.41624	11.2007
11.6074	11.0033	0.60414	11.3053
11.6202	10.9772	0.64299	11.2987
11.3408	10.8679	0.47298	11.1044
10.6948	10.6169	0.0779	10.6559
9.86507	10.1718	-0.30677	10.0185
8.99515	9.53284	-0.53769	9.264
7.99125	8.77135	-0.7801	8.3813
6.6888	7.99293	-1.30413	7.34086
5.11488	7.27533	-2.16045	6.1951
3.72092	6.69016	-2.96924	5.20554
3.38571	6.39763	-3.01192	4.89167
4.15515	6.57601	-2.42086	5.36558
5.51665	7.33958	-1.82293	6.42812
7.49372	8.72785	-1.23413	8.11078
10.0178	10.5705	-0.55272	10.2941
12.507	12.4865	0.02053	12.4968
13.7488	14.0454	-0.29654	13.8971
14.0097	14.882	-0.8723	14.4459
15.7554	14.8401	0.91535	15.2977
18.4244	14.4951	3.92927	16.4598
18.8775	14.8568	4.02071	16.8671
17.1998	15.2286	1.97119	16.2142
14.4972	13.9515	0.54571	14.2244
11.4055	10.8623	0.5431	11.1339
8.30922	7.10558	1.20364	7.7074
5.59868	3.90635	1.69233	4.75251
3.48798	1.98367	1.50431	2.73583
1.8149	1.33377	0.48113	1.57434
0.58502	1.16787	-0.58285	0.876445
1.05327	1.06227	-0.009	1.05777
1.66158	1.0595	0.60208	1.36054
1.81685	1.15182	0.66503	1.48434
1.66432	1.1963	0.46802	1.43031
1.38194	1.09991	0.28203	1.24092
1.02447	0.87593	0.14854	0.9502
0.71403	0.58099	0.13304	0.64751
0.47546	0.30444	0.17102	0.38995
0.33509	0.21617	0.11892	0.27563
0.17548	0.30402	-0.12854	0.23975
0.35182	0.37808	-0.02626	0.36495
0.65688	0.42019	0.23669	0.538535
0.5638	0.4457	0.1181	0.50475
0.33734	0.4565	-0.11916	0.39692
0.25768	0.44985	-0.19217	0.353765
0.33434	0.43548	-0.10114	0.38491
0.44063	0.43614	0.00449	0.438385
0.45464	0.46921	-0.01457	0.461925
0.38102	0.52215	-0.14113	0.451585
0.31909	0.57427	-0.25518	0.44668
0.29511	0.62335	-0.32824	0.45923
0.26673	0.67205	-0.40532	0.46939
0.28466	0.7101	-0.42544	0.49738
0.22984	0.71714	-0.4873	0.47349
0.29598	0.68101	-0.38503	0.488495
0.26639	0.61026	-0.34387	0.438325
0.31099	0.52623	-0.21524	0.41861
0.33223	0.44847	-0.11624	0.39035
0.17244	0.38818	-0.21574	0.28031
0.39227	0.34743	0.04484	0.36985
0.31132	0.32397	-0.01265	0.317645
0.24524	0.3178	-0.07256	0.28152
0.39736	0.33219	0.06517	0.364775
0.30954	0.36869	-0.05915	0.339115
0.1894	0.41826	-0.22886	0.30383
0.15321	0.4599	-0.30669	0.306555
0.04521	0.47426	-0.42905	0.259735
0.11468	0.46961	-0.35493	0.292145
0.08104	0.49931	-0.41827	0.290175
0.08745	0.59433	-0.50688	0.34089
0.2961	0.64777	-0.35167	0.471935
1.03976	0.49553	0.54423	0.767645
2.71092	0.90838	1.80254	1.80965
5.55118	2.68373	2.86745	4.11745
8.73426	5.36549	3.36877	7.04988
11.4986	8.36971	3.12886	9.93414
13.8228	10.9724	2.85037	12.3976
15.7437	12.816	2.92769	14.2798
17.2993	13.9907	3.30857	15.645
18.3879	14.716	3.67183	16.5519
18.7928	15.1557	3.63709	16.9743
18.4427	15.3561	3.0866	16.8994
17.3702	15.229	2.14118	16.2996
15.5973	14.6	0.9973	15.0987
13.3471	13.1822	0.16494	13.2647
10.6956	10.6603	0.03534	10.6779
7.76642	7.05232	0.7141	7.40937
6.39127	3.11895	3.27232	4.75511
8.20902	2.87984	5.32918	5.54443
10.39	5.93141	4.45861	8.16071
11.298	8.34749	2.95055	9.82277
11.1562	9.8122	1.344	10.4842
10.6258	10.2526	0.37319	10.4392
10.0811	9.78485	0.29626	9.93298
9.60437	8.92346	0.68091	9.26392
9.27626	8.28497	0.99129	8.78062
9.24489	8.14333	1.10156	8.69411
9.46098	8.41422	1.04676	8.9376
9.8093	8.92314	0.88616	9.36622
10.2775	9.54432	0.73315	9.9109
10.6893	10.1736	0.51572	10.4315
11.0671	10.7254	0.34171	10.8962
11.6093	11.1664	0.44283	11.3879
12.2291	11.5144	0.71466	11.8717
12.739	11.7865	0.95245	12.2628
12.9792	11.9669	1.01233	12.4731
12.9493	12.0397	0.90964	12.4945
12.787	12.0113	0.77574	12.3991
12.572	11.894	0.67802	12.233
12.3909	11.6935	0.69747	12.0422
12.0594	11.3862	0.67324	11.7228
11.3485	10.9093	0.43919	11.1289
10.2026	10.2048	-0.00219	10.2037
8.64631	9.27472	-0.62841	8.96052
6.87375	8.18488	-1.31113	7.52932
5.01429	7.01935	-2.00506	6.01682
3.60377	6.00927	-2.4055	4.80652
4.06034	5.89886	-1.83852	4.9796
6.22228	7.36419	-1.14191	6.79323
9.35457	10.0023	-0.64768	9.67841
13.4493	13.2456	0.20366	13.3475
17.0553	16.7403	0.315	16.8978
19.1474	19.8606	-0.7132	19.504
20.7754	21.8314	-1.05597	21.3034
21.944	22.3481	-0.40412	22.1461
21.397	21.412	-0.015	21.4045
18.9312	19.1761	-0.24498	19.0537
15.375	16.2976	-0.92257	15.8363
11.538	13.2349	-1.69699	12.3864
8.11198	9.74185	-1.62987	8.92692
5.32946	5.96563	-0.63617	5.64755
3.02247	2.7718	0.25067	2.89714
1.31419	0.9798	0.33439	1.14699
0.87507	0.98056	-0.10549	0.927815
1.5456	1.23972	0.30588	1.39266
1.91321	1.33463	0.57858	1.62392
1.74544	1.30328	0.44216	1.52436
1.43871	1.14031	0.2984	1.28951
1.13524	0.90095	0.23429	1.01809
0.8833	0.66862	0.21468	0.77596
0.65407	0.51314	0.14093	0.583605
0.2816	0.44158	-0.15998	0.36159
0.25997	0.40272	-0.14275	0.331345
0.29523	0.38369	-0.08846	0.33946
0.28093	0.40014	-0.11921	0.340535
0.14637	0.44253	-0.29616	0.29445
0.14541	0.47366	-0.32825	0.309535
0.2339	0.47066	-0.23676	0.35228
0.21414	0.4475	-0.23336	0.33082
0.29013	0.43256	-0.14243	0.361345
0.3421	0.43594	-0.09384	0.38902
0.25687	0.44546	-0.18859	0.351165
0.22318	0.44846	-0.22528	0.33582
0.11924	0.44735	-0.32811	0.283295
0.16189	0.45254	-0.29065	0.307215
0.13577	0.46771	-0.33194	0.30174
0.11249	0.48732	-0.37483	0.299905
0.21486	0.5043	-0.28944	0.35958
0.2465	0.51382	-0.26732	0.38016
0.34668	0.5116	-0.16492	0.42914
0.14332	0.49452	-0.3512	0.31892
0.15689	0.46343	-0.30654	0.31016
0.16076	0.42434	-0.26358	0.29255
0.0936	0.38771	-0.29411	0.240655
0.08759	0.36442	-0.27683	0.226005
0.29527	0.35972	-0.06445	0.327495
0.23062	0.3715	-0.14088	0.30106
0.06478	0.39375	-0.32897	0.229265
0.12244	0.42039	-0.29795	0.271415
0.10194	0.4464	-0.34446	0.27417
0.14894	0.46581	-0.31687	0.307375
0.12547	0.46938	-0.34391	0.297425
0.21209	0.45167	-0.23958	0.33188
0.23287	0.42472	-0.19185	0.328795
0.18019	0.4148	-0.23461	0.297495
0.0969	0.4376	-0.3407	0.26725
0.08189	0.47411	-0.39222	0.278
0.1775	0.4601	-0.2826	0.3188
0.71774	0.35654	0.3612	0.53714
2.20944	0.72055	1.48889	1.465
4.41114	1.86188	2.54926	3.13651
6.58006	3.46508	3.11498	5.02257
8.3537	5.25509	3.09861	6.80439
10.004	7.06505	2.93898	8.53454
11.7328	8.77082	2.96199	10.2518
13.4307	10.2107	3.22002	11.8207
14.8723	11.3301	3.54215	13.1012
16.0284	12.2462	3.78225	14.1373
16.8996	13.0959	3.80367	14.9977
17.284	13.8553	3.42864	15.5696
16.9443	14.3275	2.61686	15.6359
15.6961	14.2818	1.41432	14.9889
13.7442	13.4985	0.24568	13.6214
11.5701	11.8232	-0.25303	11.6967
9.08679	9.33213	-0.24534	9.20946
6.78898	6.25331	0.53567	6.52114
7.08196	3.09055	3.99141	5.08625
9.18651	3.35709	5.82942	6.2718
10.7348	6.65247	4.08236	8.69365
11.246	9.30177	1.94425	10.2739
10.951	10.4924	0.45869	10.7217
10.4432	10.285	0.15816	10.3641
10.0648	9.37543	0.68937	9.72011
9.84017	8.6047	1.23547	9.22244
9.84154	8.38923	1.45231	9.11538
9.95062	8.63356	1.31706	9.29209
10.0838	9.07503	1.00876	9.57941
10.2859	9.54628	0.73964	9.9161
10.4773	9.98415	0.49311	10.2307
10.7715	10.3879	0.38362	10.5797
11.2835	10.7676	0.51588	11.0255
11.7278	11.0995	0.62828	11.4137
11.9685	11.3425	0.626	11.6555
12.0819	11.4731	0.60882	11.7775
12.0619	11.4978	0.5641	11.7799
11.887	11.4451	0.44193	11.6661
11.7149	11.3378	0.37715	11.5264
11.6559	11.1663	0.48961	11.4111
11.2924	10.8735	0.41889	11.083
10.4087	10.3799	0.02885	10.3943
9.26755	9.65389	-0.38634	9.46072
8.02967	8.75655	-0.72688	8.39311
6.65395	7.8134	-1.15945	7.23367
5.04415	6.93254	-1.88839	5.98835
3.53781	6.207	-2.66919	4.8724
2.99083	5.84043	-2.8496	4.41563
3.88712	6.1243	-2.23718	5.00571
5.74401	7.32405	-1.58004	6.53403
8.88927	9.57206	-0.68279	9.23067
12.8337	12.6232	0.21055	12.7284
15.6524	15.7617	-0.10922	15.707
17.2667	18.0877	-0.82105	17.6772
19.2271	19.0177	0.20936	19.1224
20.6786	18.5113	2.16734	19.5949
20.0564	17.1248	2.9316	18.5906
17.735	15.7565	1.97847	16.7457
14.5794	14.2929	0.28646	14.4361
11.2833	11.7362	-0.45289	11.5097
8.11677	8.17163	-0.05486	8.1442
5.28874	4.76266	0.52608	5.0257
3.12911	2.4024	0.72671	2.76575
1.56918	1.26003	0.30915	1.4146
0.7607	1.06998	-0.30928	0.91534
1.31475	1.26296	0.05179	1.28886
1.78777	1.45913	0.32864	1.62345
1.95226	1.484	0.46826	1.71813
1.82151	1.29832	0.52319	1.55991
1.47437	0.95286	0.52151	1.21361
1.058	0.55928	0.49872	0.80864
0.59815	0.2775	0.32065	0.437825
0.19842	0.27247	-0.07405	0.235445
0.16468	0.37058	-0.2059	0.26763
0.22529	0.43093	-0.20564	0.32811
0.1898	0.45831	-0.26851	0.324055
0.38143	0.47229	-0.09086	0.42686
0.40865	0.47698	-0.06833	0.442815
0.29844	0.47387	-0.17543	0.386155
0.30674	0.46964	-0.1629	0.38819
0.38166	0.47391	-0.09225	0.427785
0.44001	0.49644	-0.05643	0.468225
0.38923	0.53759	-0.14836	0.46341
0.18728	0.5843	-0.39702	0.38579
0.25967	0.6216	-0.36193	0.440635
0.279	0.64487	-0.36587	0.461935
0.19735	0.65943	-0.46208	0.42839
0.21983	0.66998	-0.45015	0.444905
0.2295	0.67259	-0.44309	0.451045
0.33952	0.65637	-0.31685	0.497945
0.23334	0.61347	-0.38013	0.423405
0.25025	0.54875	-0.2985	0.3995
0.17262	0.47779	-0.30517	0.325205
0.07275	0.41737	-0.34462	0.24506
0.10944	0.37906	-0.26962	0.24425
0.23456	0.36819	-0.13363	0.301375
0.24317	0.38348	-0.14031	0.313325
0.17316	0.41582	-0.24266	0.29449
0.15622	0.45419	-0.29797	0.305205
0.13903	0.49064	-0.35161	0.314835
0.15038	0.51937	-0.36899	0.334875
0.09224	0.53776	-0.44552	0.315
0.05459	0.54608	-0.49149	0.300335
0.07953	0.54144	-0.46191	0.310485
0.38488	0.51362	-0.12874	0.44925
1.0338	0.50314	0.53066	0.76847
2.3106	0.81103	1.49957	1.56082
4.25346	1.7459	2.50756	2.99968
6.36366	3.29667	3.06699	4.83017
8.16842	5.15782	3.0106	6.66312
9.61034	6.84559	2.76475	8.22797
10.6947	8.08913	2.60559	9.39193
11.6029	8.93616	2.66673	10.2695
12.6154	9.55837	3.05705	11.0869
13.7145	10.1265	3.58808	11.9205
14.7319	10.7744	3.95752	12.7532
15.5339	11.5616	3.97233	13.5478
15.9532	12.4038	3.54934	14.1785
15.6914	13.0596	2.63181	14.3755
14.6539	13.223	1.43092	13.9384
13.0012	12.5722	0.429	12.7867
11.2422	10.8566	0.38556	11.0494
9.62159	8.11648	1.50511	8.86904
7.96025	4.84665	3.1136	6.40345
7.66615	2.76401	4.90214	5.21508
9.90959	4.73474	5.17485	7.32217
12.218	7.93444	4.28352	10.0762
13.1207	10.7231	2.39758	11.9219
12.7785	12.2678	0.51075	12.5232
11.8081	12.2433	-0.4352	12.0257
10.799	11.1253	-0.32629	10.9621
10.0637	9.73688	0.32684	9.9003
9.55899	8.6828	0.87619	9.1209
9.19441	8.20407	0.99034	8.69924
8.97346	8.25431	0.71915	8.61388
8.94231	8.63302	0.30929	8.78767
9.10465	9.12901	-0.02436	9.11683
9.4579	9.61239	-0.15449	9.53514
9.92816	10.0312	-0.10303	9.97968
10.4101	10.3769	0.03323	10.3935
10.865	10.6568	0.20814	10.7609
11.1075	10.8696	0.238	10.9886
11.1472	11.0064	0.14077	11.0768
11.234	11.0548	0.17919	11.1444
11.3674	11.0057	0.3617	11.1866
11.2825	10.8653	0.41715	11.0739
10.8472	10.6299	0.21733	10.7386
10.1482	10.2617	-0.11349	10.2049
9.27859	9.71762	-0.43903	9.4981
8.20784	8.99624	-0.7884	8.60204
6.82595	8.14728	-1.32133	7.48662
4.9739	7.2353	-2.2614	6.1046
3.2794	6.40305	-3.12365	4.84122
3.07699	6.06219	-2.9852	4.56959
4.19215	6.65987	-2.46772	5.42601
6.01711	8.13809	-2.12098	7.0776
8.8972	10.2343	-1.33708	9.56574
12.7484	12.8031	-0.05467	12.7758
15.4955	15.4901	0.00537	15.4928
16.6592	17.5888	-0.92968	17.124
18.3674	18.4146	-0.04718	18.391
20.0474	17.6875	2.35981	18.8674
19.691	16.0151	3.67594	17.8531
17.5727	14.7921	2.7806	16.1824
14.6892	13.9119	0.77736	14.3006
11.5178	11.7603	-0.24253	11.639
8.16359	8.1624	0.00119	8.16299
5.10263	4.43581	0.66682	4.76922
2.75735	1.84506	0.91229	2.3012
1.05484	1.06299	-0.00815	1.05892
0.63548	1.19782	-0.56234	0.91665
1.37229	1.26569	0.1066	1.31899
1.73692	1.30585	0.43107	1.52138
1.75177	1.29294	0.45883	1.52236
1.50864	1.16121	0.34743	1.33493
1.07877	0.91416	0.16461	0.996465
0.63127	0.6339	-0.00263	0.632585
0.47271	0.43553	0.03718	0.45412
0.39663	0.36688	0.02975	0.381755
0.17886	0.37303	-0.19417	0.275945
0.16655	0.39711	-0.23056	0.28183
0.20635	0.42117	-0.21482	0.31376
0.26502	0.43949	-0.17447	0.352255
0.296	0.44672	-0.15072	0.37136
0.24015	0.44764	-0.20749	0.343895
0.20475	0.45153	-0.24678	0.32814
0.29569	0.46071	-0.16502	0.3782
0.35978	0.47297	-0.11319	0.416375
0.24436	0.48955	-0.24519	0.366955
0.04085	0.51508	-0.47423	0.277965
0.17987	0.54943	-0.36956	0.36465
0.19952	0.5886	-0.38908	0.39406
0.28684	0.63137	-0.34453	0.459105
0.33728	0.67551	-0.33823	0.506395
0.20156	0.70822	-0.50666	0.45489
0.12222	0.70782	-0.5856	0.41502
0.47948	0.66174	-0.18226	0.57061
0.59591	0.58109	0.01482	0.5885
0.19476	0.49356	-0.2988	0.34416
0.73627	0.42447	0.3118	0.58037
0.6482	0.38536	0.26284	0.51678
0.07803	0.37447	-0.29644	0.22625
0.35466	0.38385	-0.02919	0.369255
0.31185	0.40565	-0.0938	0.35875
0.17512	0.43504	-0.25992	0.30508
0.17383	0.47033	-0.2965	0.32208
0.16565	0.50877	-0.34312	0.33721
0.07883	0.54017	-0.46134	0.3095
0.14407	0.55042	-0.40635	0.347245
0.06936	0.53932	-0.46996	0.30434
0.20501	0.53285	-0.32784	0.36893
0.05937	0.55727	-0.4979	0.30832
0.106	0.58037	-0.47437	0.343185
0.3275	0.50506	-0.17756	0.41628
1.11517	0.43867	0.6765	0.77692
2.81765	1.20073	1.61692	2.00919
5.14322	2.67338	2.46984	3.9083
7.18348	4.46448	2.719	5.82398
8.69248	6.16199	2.53049	7.42723
9.92622	7.54549	2.38073	8.73586
11.0703	8.61873	2.45158	9.84452
12.2878	9.46104	2.82676	10.8744
13.5367	10.1911	3.34558	11.8639
14.6445	10.9487	3.69586	12.7966
15.5785	11.8174	3.76101	13.6979
16.1537	12.7228	3.43095	14.4383
16.0753	13.4098	2.66552	14.7425
15.1514	13.5834	1.568	14.3674
13.4212	12.9913	0.42998	13.2063
11.3646	11.4556	-0.09101	11.4101
8.97426	9.0291	-0.05484	9.00168
6.39894	5.95228	0.44666	6.17561
6.37785	2.7525	3.62535	4.56517
8.59385	3.1384	5.45545	5.86613
10.1648	6.32942	3.83541	8.24713
10.5496	8.74521	1.80443	9.64743
10.1167	9.75262	0.36405	9.93464
9.4358	9.48878	-0.05298	9.46229
8.87377	8.63071	0.24306	8.75224
8.63876	7.9401	0.69866	8.28943
8.8147	7.77128	1.04342	8.29299
9.09634	8.04424	1.0521	8.57029
9.22255	8.53699	0.68556	8.87977
9.32671	9.08096	0.24575	9.20383
9.63742	9.57551	0.06191	9.60647
10.1677	9.99268	0.17498	10.0802
10.6998	10.3497	0.35013	10.5248
11.0713	10.6444	0.4269	10.8578
11.3313	10.8482	0.48312	11.0897
11.4756	10.9355	0.54017	11.2056
11.4357	10.9046	0.53115	11.1702
11.4163	10.7835	0.63287	11.0999
11.3983	10.6154	0.78291	11.0068
11.2271	10.4384	0.78864	10.8328
10.9414	10.2655	0.67589	10.6035
10.4722	10.0744	0.39775	10.2733
9.78513	9.81897	-0.03384	9.80205
8.86894	9.42764	-0.5587	9.14829
7.88709	8.81633	-0.92924	8.35171
6.96175	7.96634	-1.00459	7.46405
[truncated: 100,010 more rows]
[truncated: 4 more columns]

## Sheet: Total right
바이콘	IMU	두값의 차	두값의 평균
9.82832	9.77093	0.05739	9.79962
8.60791	9.17267	-0.56476	8.89029
7.29672	8.61788	-1.32116	7.9573
6.127	8.09075	-1.96375	7.10887
5.24311	7.62211	-2.379	6.43261
4.74826	7.30093	-2.55267	6.02459
5.04127	7.40947	-2.3682	6.22537
6.5066	8.4609	-1.9543	7.48375
9.32845	10.6619	-1.33341	9.99516
12.6375	13.5082	-0.8707	13.0729
15.0907	16.1818	-1.09113	15.6363
16.04	17.9345	-1.89451	16.9873
17.2117	18.1802	-0.96851	17.6959
19.2333	17.0351	2.19816	18.1342
19.4946	15.703	3.79161	17.5988
17.9915	14.6068	3.38463	16.2991
15.3034	12.643	2.66039	13.9732
11.9325	9.56328	2.36918	10.7479
8.54506	6.30903	2.23603	7.42704
5.46055	3.66747	1.79308	4.56401
3.16891	1.84614	1.32277	2.50752
1.55429	0.8491	0.70519	1.20169
0.72393	0.70683	0.0171	0.71538
1.1875	0.90318	0.28432	1.04534
1.51016	0.98631	0.52385	1.24823
1.6108	0.92977	0.68103	1.27028
1.41359	0.84752	0.56607	1.13055
1.04975	0.85176	0.19799	0.950755
0.95732	0.90855	0.04877	0.932935
0.75871	0.91433	-0.15562	0.83652
0.40932	0.83273	-0.42341	0.621025
0.13991	0.69147	-0.55156	0.41569
0.27922	0.55057	-0.27135	0.414895
0.44238	0.4672	-0.02482	0.45479
0.4165	0.45294	-0.03644	0.43472
0.44477	0.47997	-0.0352	0.46237
0.35016	0.51766	-0.1675	0.43391
0.2928	0.54927	-0.25647	0.421035
0.33635	0.57269	-0.23634	0.45452
0.50074	0.59245	-0.09171	0.546595
0.4993	0.61142	-0.11212	0.55536
0.21878	0.62462	-0.40584	0.4217
0.28558	0.62933	-0.34375	0.457455
0.3438	0.63939	-0.29559	0.491595
0.37751	0.6729	-0.29539	0.525205
0.3315	0.7271	-0.3956	0.5293
0.17055	0.77844	-0.60789	0.474495
0.22075	0.8082	-0.58745	0.514475
0.32297	0.81612	-0.49315	0.569545
0.28621	0.81098	-0.52477	0.548595
0.1939	0.79861	-0.60471	0.496255
0.0584	0.77917	-0.72077	0.418785
0.14093	0.75202	-0.61109	0.446475
0.17746	0.72152	-0.54406	0.44949
0.148	0.6952	-0.5472	0.4216
0.08291	0.678	-0.59509	0.380455
0.09644	0.67164	-0.5752	0.38404
0.11628	0.67612	-0.55984	0.3962
0.06622	0.68844	-0.62222	0.37733
0.0988	0.70234	-0.60354	0.40057
0.22004	0.71304	-0.493	0.46654
0.29311	0.72105	-0.42794	0.50708
0.26512	0.72906	-0.46394	0.49709
0.49143	0.73723	-0.2458	0.61433
0.27333	0.74199	-0.46866	0.50766
0.11585	0.73741	-0.62156	0.42663
0.06975	0.71713	-0.64738	0.39344
0.13375	0.67946	-0.54571	0.406605
0.21575	0.63636	-0.42061	0.426055
0.26267	0.61302	-0.35035	0.437845
0.37339	0.6252	-0.25181	0.499295
0.81089	0.66144	0.14945	0.736165
1.80536	0.80935	0.99601	1.30736
3.6611	1.51555	2.14555	2.58832
6.20638	3.11265	3.09373	4.65951
9.12138	5.52527	3.59611	7.32333
12.246	8.36556	3.88041	10.3058
15.204	11.1467	4.05727	13.1753
17.6877	13.6188	4.06886	15.6533
19.5916	15.6939	3.8977	17.6428
20.6992	17.2123	3.48694	18.9558
20.7991	17.9946	2.80449	19.3969
19.9215	17.905	2.01647	18.9133
18.295	16.825	1.47	17.56
16.0715	14.7189	1.35252	15.3952
13.5118	11.7425	1.76932	12.6272
10.8661	8.32902	2.53713	9.59758
9.26543	5.40444	3.86099	7.33493
11.0498	5.40132	5.64847	8.22555
14.393	8.44483	5.94813	11.4189
16.7511	11.4847	5.26637	14.1179
17.3941	13.2208	4.17336	15.3074
16.6688	13.4895	3.17928	15.0792
15.2809	12.5287	2.75214	13.9048
13.8281	10.8942	2.93389	12.3612
12.6276	9.38599	3.24165	11.0068
11.6567	8.60755	3.04919	10.1321
10.8664	8.64403	2.22235	9.75521
10.3175	9.10249	1.21504	9.71001
10.0048	9.54646	0.45838	9.77565
9.87306	9.80097	0.07209	9.83702
9.92405	9.90782	0.01623	9.91593
10.0011	9.99385	0.00721	9.99746
9.96834	10.1299	-0.16158	10.0491
9.93953	10.2768	-0.33732	10.1082
9.96095	10.3542	-0.39329	10.1576
9.94544	10.316	-0.37057	10.1307
9.75059	10.1637	-0.41314	9.95716
9.25949	9.90166	-0.64217	9.58057
8.52978	9.51377	-0.98399	9.02177
7.72778	9.00609	-1.27831	8.36693
6.82294	8.43169	-1.60875	7.62731
5.81582	7.84734	-2.03152	6.83158
4.85579	7.25826	-2.40247	6.05702
4.00361	6.66727	-2.66366	5.33544
3.5332	6.22197	-2.68877	4.87758
4.05653	6.22476	-2.16823	5.14065
5.29794	6.95442	-1.65648	6.12618
7.41946	8.61287	-1.19341	8.01616
10.7585	11.3604	-0.60194	11.0595
14.4005	15.0394	-0.63889	14.72
16.9173	18.8961	-1.97876	17.9067
18.2337	21.6991	-3.46543	19.9664
19.069	22.2515	-3.18244	20.6603
18.863	20.2748	-1.41171	19.5689
17.2259	16.7689	0.45706	16.9974
14.5845	12.9349	1.64961	13.7597
11.6396	9.33115	2.30845	10.4854
8.66575	6.29005	2.3757	7.4779
5.89175	3.95528	1.93647	4.92352
3.48119	2.27143	1.20976	2.87631
1.6498	1.20947	0.44033	1.42963
0.66438	0.73026	-0.06588	0.69732
0.89494	0.78728	0.10766	0.84111
1.42921	1.00021	0.429	1.21471
1.61866	1.07689	0.54177	1.34777
1.44358	0.99166	0.45192	1.21762
1.08659	0.83766	0.24893	0.962125
0.85472	0.75055	0.10417	0.802635
0.77318	0.75798	0.0152	0.76558
0.64864	0.76113	-0.11249	0.704885
0.50285	0.70899	-0.20614	0.60592
0.29922	0.61944	-0.32022	0.45933
0.24247	0.54241	-0.29994	0.39244
0.61835	0.516	0.10235	0.567175
0.70047	0.53102	0.16945	0.615745
0.57425	0.5591	0.01515	0.566675
0.47627	0.58449	-0.10822	0.53038
0.53182	0.60278	-0.07096	0.5673
0.48688	0.61104	-0.12416	0.54896
0.482	0.61411	-0.13211	0.548055
0.33881	0.62946	-0.29065	0.484135
0.09956	0.66658	-0.56702	0.38307
0.20141	0.71865	-0.51724	0.46003
0.33254	0.77947	-0.44693	0.556005
0.35265	0.84616	-0.49351	0.599405
0.3966	0.90658	-0.50998	0.65159
0.3983	0.94142	-0.54312	0.66986
0.42225	0.94342	-0.52117	0.682835
0.37125	0.92149	-0.55024	0.64637
0.26981	0.88644	-0.61663	0.578125
0.21097	0.844	-0.63303	0.527485
0.21779	0.79845	-0.58066	0.50812
0.11357	0.75629	-0.64272	0.43493
0.13535	0.72475	-0.5894	0.43005
0.22628	0.70749	-0.48121	0.466885
0.14097	0.70488	-0.56391	0.422925
0.24478	0.71607	-0.47129	0.480425
0.39658	0.73638	-0.3398	0.56648
0.25827	0.75422	-0.49595	0.506245
0.03919	0.75783	-0.71864	0.39851
0.06302	0.74762	-0.6846	0.40532
0.14322	0.73571	-0.59249	0.439465
0.22745	0.7324	-0.50495	0.479925
0.20258	0.73847	-0.53589	0.470525
0.03767	0.74903	-0.71136	0.39335
0.17236	0.76108	-0.58872	0.46672
0.1769	0.77795	-0.60105	0.477425
0.41819	0.80652	-0.38833	0.612355
1.00641	0.8536	0.15281	0.930005
1.66951	0.97273	0.69678	1.32112
2.62587	1.39062	1.23525	2.00825
4.28014	2.37309	1.90705	3.32662
6.462	3.91354	2.54846	5.18777
8.77677	5.76704	3.00973	7.27191
11.0825	7.65112	3.43137	9.3668
13.0423	9.45453	3.58776	11.2484
14.6019	11.16	3.44194	12.881
16.0828	12.6764	3.40643	14.3796
17.2988	13.8786	3.42019	15.5887
17.8977	14.6803	3.21741	16.289
17.8449	15.0117	2.83316	16.4283
17.1224	14.7605	2.36192	15.9414
15.6986	13.8047	1.89391	14.7516
13.7202	12.1474	1.57273	12.9338
11.4926	9.88552	1.60706	10.689
9.4502	7.24944	2.20076	8.34982
9.6445	5.33262	4.31188	7.48856
13.0833	6.21616	6.86713	9.64973
16.6183	9.24088	7.37739	12.9296
18.4899	12.3629	6.12705	15.4264
18.4117	14.2269	4.18483	16.3193
16.9207	14.3642	2.55651	15.6425
14.9281	13.1048	1.82332	14.0164
13.0288	11.0436	1.98518	12.0362
11.4392	9.00866	2.43055	10.2239
10.2339	7.89334	2.34051	9.06359
9.42035	7.84083	1.57952	8.63059
8.9435	8.21741	0.72609	8.58046
8.79741	8.54984	0.24757	8.67362
8.88209	8.81733	0.06476	8.84971
9.03794	9.13084	-0.0929	9.08439
9.21575	9.4765	-0.26075	9.34613
9.42024	9.74546	-0.32522	9.58285
9.61889	9.85258	-0.23369	9.73574
9.66079	9.77024	-0.10945	9.71551
9.36722	9.5141	-0.14688	9.44066
8.69522	9.14655	-0.45133	8.92089
7.82644	8.74237	-0.91593	8.2844
6.96977	8.34429	-1.37452	7.65703
6.18162	7.97672	-1.7951	7.07917
5.44438	7.64056	-2.19618	6.54247
4.65306	7.32789	-2.67483	5.99047
4.15449	7.11437	-2.95988	5.63443
4.51338	7.17366	-2.66028	5.84352
5.63519	7.67731	-2.04212	6.65625
7.26337	8.75385	-1.49048	8.00861
9.33244	10.5276	-1.1952	9.93004
11.7773	12.9749	-1.1976	12.3761
13.9571	15.6732	-1.71606	14.8152
15.093	17.7929	-2.69988	16.4429
15.5042	18.477	-2.97278	16.9906
16.3273	17.5358	-1.20852	16.9316
16.361	15.6893	0.67172	16.0251
15.0793	13.7082	1.37106	14.3937
12.954	11.727	1.22702	12.3405
10.4304	9.51866	0.91174	9.97453
7.79146	6.90506	0.8864	7.34826
5.22389	4.19894	1.02495	4.71142
2.99765	2.10391	0.89374	2.55078
1.4705	1.0807	0.3898	1.2756
0.64146	0.86739	-0.22593	0.754425
0.71855	0.83694	-0.11839	0.777745
1.00561	0.82571	0.1799	0.91566
1.35268	0.80388	0.5488	1.07828
1.55415	0.7456	0.80855	1.14987
1.26078	0.70625	0.55453	0.983515
0.8567	0.75197	0.10473	0.804335
0.67984	0.83795	-0.15811	0.758895
0.50175	0.87673	-0.37498	0.68924
0.26706	0.83143	-0.56437	0.549245
0.13199	0.72619	-0.5942	0.42909
0.39314	0.61435	-0.22121	0.503745
0.48893	0.53326	-0.04433	0.511095
0.48752	0.47949	0.00803	0.483505
0.42633	0.43625	-0.00992	0.43129
0.31344	0.40918	-0.09574	0.36131
0.32297	0.407	-0.08403	0.364985
0.40389	0.42524	-0.02135	0.414565
0.39861	0.46282	-0.06421	0.430715
0.30894	0.51411	-0.20517	0.411525
0.11076	0.56771	-0.45695	0.339235
0.19064	0.62016	-0.42952	0.4054
0.30646	0.67247	-0.36601	0.489465
0.32017	0.71806	-0.39789	0.519115
0.27468	0.74449	-0.46981	0.509585
0.14974	0.74805	-0.59831	0.448895
0.20387	0.73684	-0.53297	0.470355
0.23451	0.71967	-0.48516	0.47709
0.18367	0.70059	-0.51692	0.44213
0.20257	0.68158	-0.47901	0.442075
0.12389	0.66564	-0.54175	0.394765
0.01704	0.65633	-0.63929	0.336685
0.09493	0.6551	-0.56017	0.375015
0.12294	0.65994	-0.537	0.39144
0.18476	0.66639	-0.48163	0.425575
0.39238	0.67029	-0.27791	0.531335
0.31752	0.66985	-0.35233	0.493685
0.10046	0.66552	-0.56506	0.38299
0.16837	0.65957	-0.4912	0.41397
0.10971	0.65575	-0.54604	0.38273
0.08487	0.65836	-0.57349	0.371615
0.11781	0.67086	-0.55305	0.394335
0.03924	0.69247	-0.65323	0.365855
0.12411	0.71623	-0.59212	0.42017
0.06737	0.73435	-0.66698	0.40086
0.35128	0.75061	-0.39933	0.550945
0.89561	0.81194	0.08367	0.853775
1.64488	1.06675	0.57813	1.35581
2.85689	1.68829	1.1686	2.27259
4.75318	2.7709	1.98228	3.76204
7.06307	4.36051	2.70256	5.71179
9.5103	6.3243	3.186	7.9173
12.019	8.39507	3.62389	10.207
14.2996	10.4218	3.87777	12.3607
16.2019	12.3306	3.87131	14.2662
17.607	13.9639	3.64317	15.7854
18.4017	15.1489	3.25284	16.7753
18.5738	15.7778	2.79595	17.1758
18.0341	15.7797	2.25444	16.9069
16.7917	15.0767	1.71496	15.9342
14.981	13.6084	1.37258	14.2947
12.8695	11.4123	1.45716	12.1409
10.6982	8.58204	2.11621	9.64015
9.44563	5.63947	3.80616	7.54255
11.1685	5.55709	5.61138	8.36278
14.6853	9.3228	5.36248	12.004
17.4026	13.2518	4.15082	15.3272
18.3545	15.465	2.88955	16.9098
17.7346	15.4976	2.23702	16.6161
16.2724	13.9787	2.29375	15.1256
14.6111	11.891	2.72007	13.2511
13.066	9.93293	3.13303	11.4994
11.8201	8.6094	3.21068	10.2147
10.9388	8.21648	2.72235	9.57766
10.3453	8.47909	1.86617	9.41217
10.0282	8.8588	1.16935	9.44347
9.9645	9.08908	0.87542	9.52679
9.96522	9.22155	0.74367	9.59339
9.99278	9.36993	0.62285	9.68135
10.0421	9.52368	0.5184	9.78288
10.0602	9.57745	0.48274	9.81882
9.99442	9.44095	0.55347	9.71768
9.69221	9.09691	0.5953	9.39456
9.12051	8.59436	0.52615	8.85743
8.31488	8.02137	0.29351	8.16812
7.30039	7.44921	-0.14882	7.3748
6.05385	6.89822	-0.84437	6.47603
4.85879	6.37803	-1.51924	5.61841
3.92651	5.89696	-1.97045	4.91174
3.08782	5.50953	-2.42171	4.29867
3.32825	5.50974	-2.18149	4.41899
5.17439	6.37937	-1.20498	5.77688
7.98499	8.29858	-0.31359	8.14178
11.527	11.1837	0.34326	11.3553
15.6024	15.0016	0.60079	15.302
19.2243	19.4338	-0.20948	19.3291
21.0953	23.5389	-2.44353	22.3171
21.1728	25.9656	-4.79274	23.5692
19.8557	25.478	-5.62229	22.6668
17.0673	21.8168	-4.74944	19.4421
13.7673	16.2886	-2.5213	15.0279
10.8058	10.8541	-0.04835	10.8299
8.20857	6.69105	1.51752	7.44981
6.0306	4.03853	1.99207	5.03456
3.91962	2.52604	1.39358	3.22283
1.82313	1.58179	0.24134	1.70246
0.85411	0.94159	-0.08748	0.89785
1.15589	0.65523	0.50066	0.90556
1.61322	0.77511	0.83811	1.19416
1.71743	0.93796	0.77947	1.3277
1.48568	0.95476	0.53092	1.22022
1.32249	0.86938	0.45311	1.09593
1.0994	0.78235	0.31705	0.940875
0.75903	0.75009	0.00894	0.75456
0.53949	0.73279	-0.1933	0.63614
0.4484	0.67806	-0.22966	0.56323
0.30493	0.59622	-0.29129	0.450575
0.19259	0.52285	-0.33026	0.35772
0.40704	0.48221	-0.07517	0.444625
0.55215	0.4806	0.07155	0.516375
0.6182	0.51084	0.10736	0.56452
0.62009	0.55475	0.06534	0.58742
0.44668	0.59268	-0.146	0.51968
0.48171	0.61687	-0.13516	0.54929
0.51171	0.63081	-0.1191	0.57126
0.36353	0.64695	-0.28342	0.50524
0.23649	0.67937	-0.44288	0.45793
0.22102	0.72653	-0.50551	0.473775
0.22433	0.77408	-0.54975	0.499205
0.31737	0.81247	-0.4951	0.56492
0.41394	0.83982	-0.42588	0.62688
0.37273	0.85413	-0.4814	0.61343
0.31691	0.85197	-0.53506	0.58444
0.26874	0.83613	-0.56739	0.552435
0.19116	0.81619	-0.62503	0.503675
0.14385	0.79911	-0.65526	0.47148
0.13769	0.78497	-0.64728	0.46133
0.13438	0.77114	-0.63676	0.45276
0.16336	0.75694	-0.59358	0.46015
0.15181	0.74436	-0.59255	0.448085
0.0734	0.73573	-0.66233	0.404565
0.10346	0.73217	-0.62871	0.417815
0.15505	0.73291	-0.57786	0.44398
0.29015	0.73593	-0.44578	0.51304
0.29492	0.73968	-0.44476	0.5173
0.14427	0.74424	-0.59997	0.444255
0.18587	0.75211	-0.56624	0.46899
0.24866	0.76708	-0.51842	0.50787
0.15905	0.78932	-0.63027	0.474185
0.13173	0.81066	-0.67893	0.471195
0.12885	0.81823	-0.68938	0.47354
0.15995	0.80589	-0.64594	0.48292
0.15565	0.77989	-0.62424	0.46777
0.26263	0.75567	-0.49304	0.50915
0.47543	0.7584	-0.28297	0.616915
0.83161	0.84717	-0.01556	0.83939
1.65821	1.13994	0.51827	1.39907
3.12936	1.78091	1.34845	2.45514
5.06056	2.87951	2.18105	3.97003
7.26291	4.39438	2.86853	5.82864
9.62332	6.185	3.43832	7.90416
11.8838	8.17077	3.713	10.0273
13.9498	10.2349	3.7149	12.0923
15.7335	12.123	3.61047	13.9282
17.0934	13.6061	3.48736	15.3497
17.9625	14.6114	3.35113	16.287
18.1928	15.1656	3.0272	16.6792
17.7169	15.2594	2.45752	16.4881
16.6695	14.7957	1.87389	15.7326
15.1206	13.6565	1.46419	14.3886
13.1175	11.6753	1.44219	12.3964
10.9671	8.71621	2.25091	9.84166
9.52991	5.54139	3.98852	7.53565
10.8196	5.87265	4.947	8.34615
14.2898	9.75125	4.53851	12.0205
17.3466	13.2689	4.07769	15.3077
18.6453	15.2547	3.39053	16.95
18.0998	15.7568	2.34306	16.9283
16.4843	14.9452	1.53904	15.7148
14.5687	12.9877	1.58094	13.7782
12.7333	10.5137	2.21956	11.6235
11.1982	8.5473	2.65087	9.87273
10.0656	7.75054	2.31502	8.90805
9.34344	7.84001	1.50343	8.59173
9.08733	8.19947	0.88786	8.6434
9.12025	8.58415	0.5361	8.8522
9.1799	8.98861	0.19129	9.08425
9.31054	9.39651	-0.08597	9.35352
9.51655	9.73475	-0.2182	9.62565
9.71444	9.93771	-0.22327	9.82607
9.92053	9.98442	-0.06389	9.95247
9.90862	9.87798	0.03064	9.8933
9.46573	9.63856	-0.17283	9.55214
8.73324	9.2863	-0.55306	9.00977
7.85316	8.82965	-0.97649	8.3414
6.88963	8.30146	-1.41183	7.59555
5.80794	7.75685	-1.94891	6.7824
4.7992	7.27107	-2.47187	6.03514
4.11929	7.00879	-2.8895	5.56404
4.04147	7.16273	-3.12126	5.6021
5.04353	7.78819	-2.74466	6.41586
6.7583	8.88882	-2.13052	7.82356
8.98265	10.6082	-1.62552	9.79541
11.8382	13.0774	-1.23922	12.4578
14.3297	15.9991	-1.66942	15.1644
15.4544	18.4395	-2.98506	16.9469
15.733	19.2185	-3.48552	17.4757
16.6917	17.8439	-1.15221	17.2678
17.1621	15.0965	2.06556	16.1293
16.0205	12.4156	3.60487	14.2181
13.8697	10.5718	3.29792	12.2207
11.4365	9.03115	2.40539	10.2338
8.71705	6.98826	1.72879	7.85266
5.81129	4.56338	1.24791	5.18734
3.46248	2.51822	0.94426	2.99035
1.9905	1.31543	0.67507	1.65297
1.003	0.83869	0.16431	0.920845
0.80382	0.81268	-0.00886	0.80825
1.13932	0.93527	0.20405	1.0373
1.29851	0.98244	0.31607	1.14047
1.15893	0.91127	0.24766	1.0351
1.05154	0.82504	0.2265	0.93829
0.92474	0.8337	0.09104	0.87922
0.70194	0.8929	-0.19096	0.79742
0.56226	0.89786	-0.3356	0.73006
0.50065	0.81327	-0.31262	0.65696
0.20408	0.68398	-0.4799	0.44403
0.49068	0.58235	-0.09167	0.536515
0.56923	0.53582	0.03341	0.552525
0.43412	0.51817	-0.08405	0.476145
0.41611	0.50762	-0.09151	0.461865
0.34642	0.51096	-0.16454	0.42869
0.30223	0.53499	-0.23276	0.41861
0.36774	0.57332	-0.20558	0.47053
0.29188	0.61787	-0.32599	0.454875
0.14748	0.65841	-0.51093	0.402945
0.15761	0.68873	-0.53112	0.42317
0.17825	0.71466	-0.53641	0.446455
0.16562	0.74612	-0.5805	0.45587
0.29005	0.78563	-0.49558	0.53784
0.39856	0.82669	-0.42813	0.612625
0.33267	0.8612	-0.52853	0.596935
0.23286	0.88503	-0.65217	0.558945
0.23041	0.89683	-0.66642	0.56362
0.2309	0.89456	-0.66366	0.56273
0.19552	0.87591	-0.68039	0.535715
0.13322	0.84336	-0.71014	0.48829
0.18888	0.80396	-0.61508	0.49642
0.22021	0.76391	-0.5437	0.49206
0.21868	0.72872	-0.51004	0.4737
0.27834	0.70494	-0.4266	0.49164
0.21045	0.69743	-0.48698	0.45394
0.32419	0.70768	-0.38349	0.515935
0.27405	0.73318	-0.45913	0.503615
0.14445	0.76572	-0.62127	0.455085
0.05305	0.79314	-0.74009	0.423095
0.07245	0.80609	-0.73364	0.43927
0.17296	0.80192	-0.62896	0.48744
0.25341	0.78574	-0.53233	0.519575
0.31478	0.77259	-0.45781	0.543685
0.45372	0.79185	-0.33813	0.622785
1.04669	0.91726	0.12943	0.981975
2.00203	1.28917	0.71286	1.6456
3.06518	1.98756	1.07762	2.52637
4.29385	2.94192	1.35193	3.61789
5.7508	4.05267	1.69813	4.90174
7.39209	5.29542	2.09667	6.34375
8.96299	6.61386	2.34913	7.78843
10.4211	7.8703	2.55079	9.14569
11.9457	9.01895	2.92674	10.4823
13.3694	10.1339	3.23555	11.7516
14.5878	11.2554	3.3324	12.9216
15.6348	12.322	3.31277	13.9784
16.3859	13.2144	3.17149	14.8001
16.5149	13.8017	2.71319	15.1583
16.0135	13.9017	2.11182	14.9576
15.0367	13.2789	1.75784	14.1578
13.1916	11.7515	1.44014	12.4716
10.6541	9.18571	1.46835	9.91989
8.94631	5.83809	3.10822	7.3922
10.8962	5.06167	5.83457	7.97896
15.0351	9.51349	5.52158	12.2743
18.4235	14.3581	4.0654	16.3908
19.9158	17.2169	2.69892	18.5663
19.5004	17.5072	1.99317	18.5038
17.9602	15.9428	2.01747	16.9515
16.0065	13.6064	2.40011	14.8065
14.1491	11.2192	2.92997	12.6842
12.6539	9.35135	3.30251	11.0026
11.4254	8.4768	2.94856	9.95108
10.3627	8.41312	1.9496	9.38792
9.46555	8.52479	0.94076	8.99517
8.7635	8.47076	0.29274	8.61713
8.30814	8.36568	-0.05754	8.33691
8.23466	8.42532	-0.19066	8.32999
8.46144	8.64337	-0.18193	8.55241
8.78613	8.85415	-0.06802	8.82014
8.98318	8.91099	0.07219	8.94709
8.79625	8.73093	0.06532	8.76359
8.24924	8.29835	-0.04911	8.27379
7.40973	7.69172	-0.28199	7.55072
6.42528	7.0291	-0.60382	6.72719
5.41073	6.39494	-0.98421	5.90283
4.26917	5.87942	-1.61025	5.07429
3.37231	5.62478	-2.25247	4.49855
4.03967	5.95525	-1.91558	4.99746
6.27325	7.39967	-1.12642	6.83646
9.66302	10.1038	-0.44075	9.8834
13.9794	13.6279	0.35152	13.8037
17.7677	17.3645	0.40324	17.5661
19.4832	20.6369	-1.15372	20.0601
19.5768	22.4338	-2.85702	21.0053
18.858	21.9033	-3.04527	20.3806
17.0869	19.4486	-2.36165	18.2677
14.3506	16.1378	-1.78724	15.2442
11.3408	12.35	-1.00911	11.8454
8.35886	8.32382	0.03504	8.34134
5.62909	4.77737	0.85172	5.20323
3.48258	2.34765	1.13493	2.91512
1.85524	1.20419	0.65105	1.52971
0.823	0.91306	-0.09006	0.86803
1.25748	0.88832	0.36916	1.0729
1.61053	0.95676	0.65377	1.28364
1.64189	0.96266	0.67923	1.30228
1.39048	0.85556	0.53492	1.12302
1.01396	0.73179	0.28217	0.872875
0.53679	0.72899	-0.1922	0.63289
0.3766	0.81958	-0.44298	0.59809
0.53751	0.87917	-0.34166	0.70834
0.62276	0.86094	-0.23818	0.74185
0.43477	0.77889	-0.34412	0.60683
0.1654	0.67281	-0.50741	0.419105
0.48566	0.5851	-0.09944	0.53538
0.58321	0.53373	0.04948	0.55847
0.44977	0.51141	-0.06164	0.48059
0.33272	0.50681	-0.17409	0.419765
0.42645	0.51758	-0.09113	0.472015
0.29429	0.54767	-0.25338	0.42098
0.30733	0.59953	-0.2922	0.45343
0.35678	0.66447	-0.30769	0.510625
0.33031	0.72126	-0.39095	0.525785
0.30347	0.75809	-0.45462	0.53078
0.20883	0.78588	-0.57705	0.497355
0.27981	0.82143	-0.54162	0.55062
0.36889	0.86545	-0.49656	0.61717
0.36407	0.90411	-0.54004	0.63409
0.28639	0.92783	-0.64144	0.60711
0.26713	0.9391	-0.67197	0.603115
0.23271	0.9441	-0.71139	0.588405
0.20363	0.94512	-0.74149	0.574375
0.24549	0.93959	-0.6941	0.59254
0.20929	0.92243	-0.71314	0.56586
0.1837	0.89029	-0.70659	0.536995
0.17893	0.84538	-0.66645	0.512155
0.07102	0.79719	-0.72617	0.434105
0.12627	0.75788	-0.63161	0.442075
0.23319	0.7341	-0.50091	0.483645
0.23493	0.72596	-0.49103	0.480445
0.24852	0.73165	-0.48313	0.490085
0.10665	0.74997	-0.64332	0.42831
0.05964	0.77913	-0.71949	0.419385
0.0423	0.81352	-0.77122	0.42791
0.21698	0.8429	-0.62592	0.52994
0.12117	0.85724	-0.73607	0.489205
0.09852	0.85602	-0.7575	0.47727
0.19563	0.85109	-0.65546	0.52336
0.27719	0.84661	-0.56942	0.5619
0.58123	0.81836	-0.23713	0.699795
1.47462	0.86264	0.61198	1.16863
2.92113	1.5232	1.39793	2.22216
4.97043	3.02483	1.9456	3.99763
7.19161	5.07826	2.11335	6.13494
9.07245	7.19564	1.87681	8.13405
10.5755	8.86149	1.71401	9.7185
11.8124	9.86591	1.94653	10.8392
12.799	10.3698	2.42918	11.5844
13.6743	10.6829	2.99137	12.1786
14.5318	11.0824	3.44941	12.8071
15.1952	11.7054	3.48982	13.4503
15.5866	12.473	3.11361	14.0298
15.5414	13.1011	2.44037	14.3213
14.8731	13.1918	1.68128	14.0325
13.6043	12.4019	1.20235	13.0031
11.8619	10.6141	1.24782	11.238
10.0878	8.04048	2.0473	9.06413
8.90385	5.40106	3.50279	7.15245
9.86349	4.54918	5.31431	7.20634
13.0905	6.90976	6.18077	10.0001
16.1816	10.4179	5.7637	13.2997
17.9323	13.283	4.64926	15.6077
17.9734	14.6489	3.32452	16.3112
16.5522	14.321	2.23115	15.4366
14.3778	12.5495	1.82825	13.4637
12.1493	10.0855	2.06386	11.1174
10.3794	7.93939	2.44002	9.1594
9.23951	6.82402	2.41549	8.03177
8.53337	6.7875	1.74587	7.66043
8.01009	7.26736	0.74273	7.63872
7.6449	7.74357	-0.09867	7.69423
7.48077	8.06437	-0.5836	7.77257
7.53085	8.29088	-0.76003	7.91086
7.73034	8.51261	-0.78227	8.12148
7.82815	8.70343	-0.87528	8.26579
7.68467	8.75791	-1.07324	8.22129
7.29448	8.62019	-1.32571	7.95733
6.75151	8.31962	-1.56811	7.53557
6.21526	7.9602	-1.74494	7.08773
5.69292	7.66213	-1.96921	6.67753
5.27293	7.47936	-2.20643	6.37614
4.91934	7.38113	-2.46179	6.15024
4.61271	7.30626	-2.69355	5.95948
4.40264	7.2142	-2.81156	5.80842
4.25107	7.07794	-2.82687	5.66451
4.28886	6.87547	-2.58661	5.58216
4.32848	6.62019	-2.29171	5.47433
4.25102	6.39402	-2.143	5.32252
4.70364	6.36618	-1.66254	5.53491
5.7027	6.81295	-1.11025	6.25783
7.16778	8.08347	-0.91569	7.62562
9.31245	10.3384	-1.0259	9.8254
11.614	13.227	-1.61298	12.4205
13.3363	15.8984	-2.56205	14.6174
14.6506	17.422	-2.77135	16.0363
15.752	17.444	-1.69206	16.598
15.616	16.2827	-0.66661	15.9494
14.3734	14.2923	0.08115	14.3329
12.2899	11.7632	0.52666	12.0265
9.69979	9.06741	0.63238	9.3836
7.15003	6.384	0.76603	6.76702
4.92427	3.92463	0.99964	4.42445
2.93859	2.09762	0.84097	2.51811
1.18983	1.09893	0.0909	1.14438
0.7263	0.80385	-0.07755	0.765075
1.19638	0.93069	0.26569	1.06353
1.59951	1.11199	0.48752	1.35575
1.63452	1.1591	0.47542	1.39681
1.46144	1.04778	0.41366	1.25461
1.28621	0.86861	0.4176	1.07741
1.01003	0.73698	0.27305	0.873505
0.45314	0.67834	-0.2252	0.56574
0.44538	0.63598	-0.1906	0.54068
0.46639	0.57412	-0.10773	0.520255
0.36069	0.51896	-0.15827	0.439825
0.4047	0.51102	-0.10632	0.45786
0.45995	0.54731	-0.08736	0.50363
0.44686	0.59684	-0.14998	0.52185
0.40286	0.64129	-0.23843	0.522075
0.36552	0.68266	-0.31714	0.52409
0.2741	0.72489	-0.45079	0.499495
0.17978	0.76338	-0.5836	0.47158
0.2238	0.79011	-0.56631	0.506955
0.19911	0.80409	-0.60498	0.5016
0.18957	0.81573	-0.62616	0.50265
0.24648	0.8391	-0.59262	0.54279
0.34594	0.8809	-0.53496	0.61342
0.41941	0.93317	-0.51376	0.67629
0.3702	0.978	-0.6078	0.6741
0.30671	1.0016	-0.69489	0.654155
0.31706	0.99919	-0.68213	0.658125
0.27967	0.96963	-0.68996	0.62465
0.21377	0.91341	-0.69964	0.56359
0.13589	0.8364	-0.70051	0.486145
0.06104	0.75364	-0.6926	0.40734
0.12143	0.68506	-0.56363	0.403245
0.15473	0.64566	-0.49093	0.400195
0.22067	0.6427	-0.42203	0.431685
0.25773	0.67393	-0.4162	0.46583
0.29098	0.72472	-0.43374	0.50785
0.12035	0.77614	-0.65579	0.448245
0.14792	0.81801	-0.67009	0.482965
0.23412	0.84983	-0.61571	0.541975
0.52359	0.87412	-0.35053	0.698855
0.62978	0.89847	-0.26869	0.764125
0.73813	0.93757	-0.19944	0.83785
1.03012	1.00452	0.0256	1.01732
1.39368	1.10909	0.28459	1.25138
1.65839	1.27583	0.38256	1.46711
2.09293	1.55685	0.53608	1.82489
2.86392	2.00487	0.85905	2.43439
3.83463	2.63657	1.19806	3.2356
5.03343	3.4578	1.57563	4.24561
6.69745	4.56909	2.12836	5.63327
8.9169	6.18479	2.73211	7.55084
11.5153	8.37765	3.1377	9.9465
14.1292	10.8927	3.23651	12.5109
16.5073	13.3211	3.18626	14.9142
18.5438	15.3648	3.17907	16.9543
19.951	16.9358	3.01522	18.4434
20.4175	17.9709	2.44657	19.1942
19.9441	18.2248	1.71926	19.0845
18.5444	17.3811	1.16328	17.9627
16.158	15.2773	0.88071	15.7176
13.3587	12.0418	1.31695	12.7002
10.7196	8.24109	2.47849	9.48034
10.193	5.37882	4.81415	7.7859
13.496	6.69893	6.79703	10.0974
17.251	10.7514	6.49966	14.0012
19.2763	14.2576	5.01865	16.7669
19.2341	15.9512	3.28292	17.5926
17.6971	15.6275	2.06959	16.6623
15.6131	13.6671	1.946	14.6401
13.8246	11.0811	2.74352	12.4529
12.6186	9.24965	3.36896	10.9341
11.7801	8.84487	2.93523	10.3125
11.1462	9.22055	1.92568	10.1834
10.6712	9.57902	1.09213	10.1251
10.3937	9.73672	0.657	10.0652
10.3125	9.80091	0.51162	10.0567
10.3442	9.86862	0.4756	10.1064
10.4047	9.98845	0.4162	10.1966
10.4996	10.1326	0.36699	10.3161
10.5818	10.2123	0.36954	10.3971
10.511	10.1431	0.36796	10.3271
10.1732	9.8753	0.29787	10.0242
9.49009	9.41349	0.0766	9.45179
8.60179	8.8213	-0.21951	8.71155
7.50156	8.18608	-0.68452	7.84382
6.19896	7.55282	-1.35386	6.87589
4.95521	6.95082	-1.99561	5.95302
4.01488	6.56827	-2.55339	5.29157
4.09096	6.78659	-2.69563	5.43877
5.63541	7.85092	-2.21551	6.74317
8.08859	9.72708	-1.63849	8.90784
11.4109	12.3641	-0.95316	11.8875
15.4071	15.6101	-0.203	15.5086
18.5802	19.0229	-0.44271	18.8016
19.7427	21.8749	-2.13218	20.8088
20.0412	23.1327	-3.09152	21.587
20.1888	22.1613	-1.97248	21.1751
18.8037	19.7308	-0.92714	19.2673
16.0607	16.8979	-0.83727	16.4793
12.7151	13.5179	-0.80287	13.1165
9.50662	9.50398	0.00264	9.5053
6.72497	5.65147	1.0735	6.18822
4.28498	2.80868	1.4763	3.54683
2.36324	1.32916	1.03408	1.8462
1.10919	0.92522	0.18397	1.0172
1.04105	0.90291	0.13814	0.97198
1.40511	0.96841	0.4367	1.18676
1.44312	0.9764	0.46672	1.20976
1.5033	0.9114	0.5919	1.20735
1.43485	0.85382	0.58103	1.14433
1.11315	0.86407	0.24908	0.98861
0.84365	0.91066	-0.06701	0.877155
0.7174	0.92718	-0.20978	0.82229
0.37375	0.88578	-0.51203	0.629765
0.09792	0.79692	-0.699	0.44742
0.36962	0.69731	-0.32769	0.533465
0.49619	0.62998	-0.13379	0.563085
0.4439	0.61025	-0.16635	0.527075
0.3475	0.61834	-0.27084	0.48292
0.3249	0.62603	-0.30113	0.475465
0.22061	0.62435	-0.40374	0.42248
0.25747	0.62574	-0.36827	0.441605
0.3798	0.64527	-0.26547	0.512535
0.3151	0.68203	-0.36693	0.498565
0.37627	0.71916	-0.34289	0.547715
0.29806	0.74761	-0.44955	0.522835
0.26247	0.77756	-0.51509	0.520015
0.33546	0.82009	-0.48463	0.577775
0.2888	0.86877	-0.57997	0.578785
0.19872	0.9047	-0.70598	0.55171
0.22811	0.91649	-0.68838	0.5723
0.25635	0.90969	-0.65334	0.58302
0.27117	0.89736	-0.62619	0.584265
0.30454	0.88704	-0.5825	0.59579
0.20395	0.87696	-0.67301	0.540455
0.13989	0.86095	-0.72106	0.50042
0.15027	0.83495	-0.68468	0.49261
0.10977	0.80131	-0.69154	0.45554
0.0648	0.7694	-0.7046	0.4171
0.22229	0.74996	-0.52767	0.486125
0.38117	0.74779	-0.36662	0.56448
0.19058	0.76076	-0.57018	0.47567
0.46495	0.78288	-0.31793	0.623915
0.62052	0.80677	-0.18625	0.713645
0.30818	0.82532	-0.51714	0.56675
0.40827	0.83319	-0.42492	0.62073
0.48019	0.82701	-0.34682	0.6536
0.182	0.80762	-0.62562	0.49481
0.14432	0.78923	-0.64491	0.466775
0.27812	0.80046	-0.52234	0.53929
0.32211	0.83811	-0.516	0.58011
0.73236	0.8262	-0.09384	0.77928
2.0394	0.92055	1.11885	1.47998
4.33679	2.00253	2.33426	3.16966
7.36758	4.22767	3.13991	5.79763
10.5171	7.1903	3.32683	8.85371
13.387	10.2616	3.1254	11.8243
15.735	12.7953	2.93965	14.2652
17.442	14.514	2.92805	15.978
18.4469	15.5015	2.94544	16.9742
18.6993	15.901	2.79833	17.3002
18.192	15.7969	2.39508	16.9945
17.0058	15.2039	1.80193	16.1049
15.3038	14.0715	1.23221	14.6876
13.2587	12.359	0.89973	12.8089
10.918	9.98971	0.9283	10.4539
8.50878	6.9107	1.59808	7.70974
8.32408	4.16695	4.15713	6.24552
11.1304	5.6205	5.50993	8.37547
13.8818	9.29105	4.59072	11.5864
15.163	11.8652	3.29777	13.5141
14.939	12.5092	2.42979	13.7241
13.7408	11.5825	2.1583	12.6617
12.2192	9.92175	2.29749	11.0705
10.7971	8.37482	2.42226	9.58595
9.63266	7.54185	2.09081	8.58725
8.85836	7.50829	1.35007	8.18332
8.52341	7.96645	0.55696	8.24493
8.51878	8.57345	-0.05467	8.54612
8.64668	9.12556	-0.47888	8.88612
8.77363	9.54622	-0.77259	9.15993
8.89288	9.83773	-0.94485	9.3653
9.01516	10.0463	-1.03109	9.53071
9.2304	10.2129	-0.98247	9.72163
9.56761	10.3579	-0.79031	9.96277
9.84119	10.4814	-0.64017	10.1613
9.91277	10.5597	-0.64694	10.2362
9.76569	10.5612	-0.79549	10.1634
9.46475	10.4564	-0.99168	9.96059
9.10273	10.2266	-1.1239	9.66468
8.71147	9.88474	-1.17327	9.2981
8.33319	9.47293	-1.13974	8.90306
7.80152	9.01972	-1.2182	8.41062
6.95207	8.4954	-1.54333	7.72373
5.92731	7.84846	-1.92115	6.88789
4.93654	7.14749	-2.21095	6.04202
4.0782	6.67682	-2.59862	5.37751
3.94677	6.80939	-2.86262	5.37808
5.03471	7.72402	-2.68931	6.37936
7.51876	9.34565	-1.82689	8.4322
10.6517	11.3895	-0.73784	11.0206
12.4457	13.3741	-0.92843	12.9099
12.3943	14.7469	-2.35255	13.5706
13.8045	15.0273	-1.22279	14.4159
17.4709	14.4016	3.06933	15.9362
18.983	13.9847	4.99835	16.4838
18.1754	13.8455	4.32988	16.0104
15.8439	12.6387	3.20519	14.2413
12.7705	9.96982	2.80067	11.3702
9.33005	6.6693	2.66075	7.99967
6.24944	3.7655	2.48394	5.00747
3.90207	1.88189	2.02018	2.89198
2.01302	1.0385	0.97452	1.52576
0.69668	0.83566	-0.13898	0.76617
0.78339	0.94747	-0.16408	0.86543
1.39292	1.0932	0.29972	1.24306
1.60329	1.10885	0.49444	1.35607
1.51413	0.99697	0.51716	1.25555
1.30394	0.8761	0.42784	1.09002
1.08419	0.83294	0.25125	0.958565
0.97345	0.81443	0.15902	0.89394
0.81564	0.75422	0.06142	0.78493
0.49343	0.65125	-0.15782	0.57234
0.42845	0.54932	-0.12087	0.488885
0.39151	0.49687	-0.10536	0.44419
0.57393	0.50168	0.07225	0.537805
0.4854	0.53515	-0.04975	0.510275
0.31467	0.56579	-0.25112	0.44023
0.32785	0.57889	-0.25104	0.45337
0.48255	0.57682	-0.09427	0.529685
0.47126	0.57081	-0.09955	0.521035
0.37807	0.57476	-0.19669	0.476415
0.19786	0.59259	-0.39473	0.395225
0.12007	0.61943	-0.49936	0.36975
0.24808	0.65585	-0.40777	0.451965
0.23683	0.70566	-0.46883	0.471245
0.18465	0.76383	-0.57918	0.47424
0.13552	0.81731	-0.68179	0.476415
0.24483	0.8578	-0.61297	0.551315
0.37648	0.88571	-0.50923	0.631095
0.35711	0.9027	-0.54559	0.629905
0.2529	0.90636	-0.65346	0.57963
0.17767	0.89076	-0.71309	0.534215
0.14142	0.85225	-0.71083	0.496835
0.13939	0.79649	-0.6571	0.46794
0.13972	0.73802	-0.5983	0.43887
0.10026	0.69268	-0.59242	0.39647
0.24865	0.67073	-0.42208	0.45969
0.32968	0.67368	-0.344	0.50168
0.33109	0.6952	-0.36411	0.513145
0.30081	0.72561	-0.4248	0.51321
0.13544	0.75668	-0.62124	0.44606
0.1862	0.78359	-0.59739	0.484895
0.24904	0.80366	-0.55462	0.52635
0.25574	0.81269	-0.55695	0.534215
0.24679	0.80445	-0.55766	0.52562
0.30212	0.77778	-0.47566	0.53995
0.39123	0.74441	-0.35318	0.56782
0.81307	0.7334	0.07967	0.773235
1.65432	0.82834	0.82598	1.24133
2.83857	1.26695	1.57162	2.05276
4.37834	2.33618	2.04216	3.35726
6.64641	4.11825	2.52816	5.38233
9.3169	6.45582	2.86108	7.88636
11.9973	8.99945	2.99787	10.4984
14.769	11.4056	3.36342	13.0873
17.3094	13.5449	3.76449	15.4272
19.0965	15.3764	3.72013	17.2364
20.0198	16.7514	3.26842	18.3856
20.1032	17.4958	2.60736	18.7995
19.3448	17.4968	1.84794	18.4208
17.7761	16.6904	1.08566	17.2332
15.4348	15.0542	0.38054	15.2445
12.6331	12.4907	0.14242	12.5619
9.90567	8.91039	0.99528	9.40803
9.31364	5.36019	3.95345	7.33691
12.0759	6.33468	5.74126	9.20531
15.2204	10.4791	4.74135	12.8497
16.8335	13.4599	3.37363	15.1467
16.6448	14.1746	2.47026	15.4097
15.2543	13.0234	2.23096	14.1389
13.5117	10.9486	2.56305	12.2301
11.9884	8.90979	3.07864	10.4491
10.821	7.68157	3.13947	9.25131
10.0385	7.51255	2.52594	8.77552
9.54709	8.03407	1.51302	8.79058
9.10324	8.70348	0.39976	8.90336
8.87169	9.22242	-0.35073	9.04706
8.95468	9.55997	-0.60529	9.25732
9.18433	9.79195	-0.60762	9.48814
9.44972	9.98913	-0.53941	9.71942
9.59513	10.1547	-0.55952	9.87489
9.63022	10.2483	-0.61812	9.93928
9.70785	10.2409	-0.53302	9.97436
9.69231	10.1229	-0.43061	9.90761
9.40837	9.90688	-0.49851	9.65762
8.93673	9.60848	-0.67175	9.27261
8.31839	9.22909	-0.9107	8.77374
7.71092	8.78566	-1.07474	8.24829
7.3125	8.32188	-1.00938	7.81719
6.86369	7.86	-0.99631	7.36185
6.16003	7.35334	-1.19331	6.75669
5.33011	6.72338	-1.39327	6.02675
4.28926	6.0022	-1.71294	5.14573
3.3787	5.47199	-2.09329	4.42535
3.6959	5.6172	-1.9213	4.65655
5.34505	6.77502	-1.42997	6.06003
8.02983	8.95609	-0.92626	8.49296
11.8388	11.9208	-0.082	11.8798
15.3512	15.2326	0.11861	15.2919
17.34	18.3301	-0.9901	17.835
18.5613	20.4179	-1.8566	19.4896
19.1429	20.8603	-1.71743	20.0016
17.836	19.8679	-2.03193	18.8519
15.4276	17.8058	-2.3782	16.6167
12.8643	14.5339	-1.66963	13.6991
10.0472	10.36	-0.31281	10.2036
7.23821	6.30595	0.93226	6.77208
4.73535	3.2671	1.46825	4.00122
2.70537	1.56523	1.14014	2.1353
1.35377	0.92887	0.4249	1.14132
0.75241	0.78691	-0.0345	0.76966
1.187	0.89276	0.29424	1.03988
1.82274	1.02986	0.79288	1.4263
1.89137	1.04489	0.84648	1.46813
1.5083	0.95171	0.55659	1.23001
1.00282	0.87556	0.12726	0.93919
0.68703	0.8761	-0.18907	0.781565
0.69856	0.86916	-0.1706	0.78386
0.55353	0.78941	-0.23588	0.67147
0.25196	0.64713	-0.39517	0.449545
0.23716	0.49859	-0.26143	0.367875
0.52584	0.41011	0.11573	0.467975
0.64431	0.40501	0.2393	0.52466
0.57585	0.4495	0.12635	0.512675
0.42057	0.50142	-0.08085	0.460995
0.36756	0.5416	-0.17404	0.45458
0.4608	0.5688	-0.108	0.5148
0.55756	0.58778	-0.03022	0.57267
0.65741	0.60386	0.05355	0.630635
0.49975	0.61761	-0.11786	0.55868
0.30204	0.63171	-0.32967	0.466875
0.40163	0.65819	-0.25656	0.52991
0.46154	0.70645	-0.24491	0.583995
0.46729	0.76822	-0.30093	0.617755
0.41135	0.82215	-0.4108	0.61675
0.38056	0.854	-0.47344	0.61728
0.40723	0.86471	-0.45748	0.63597
0.39437	0.86028	-0.46591	0.627325
0.27042	0.84223	-0.57181	0.556325
0.09607	0.80705	-0.71098	0.45156
0.05786	0.75335	-0.69549	0.405605
0.14501	0.6908	-0.54579	0.417905
0.18739	0.63787	-0.45048	0.41263
0.16251	0.60954	-0.44703	0.386025
0.07035	0.61094	-0.54059	0.340645
0.1271	0.63803	-0.51093	0.382565
0.14838	0.67816	-0.52978	0.41327
0.23784	0.71509	-0.47725	0.476465
0.29669	0.73903	-0.44234	0.51786
0.12133	0.74986	-0.62853	0.435595
0.14336	0.75209	-0.60873	0.447725
0.28228	0.74965	-0.46737	0.515965
0.24543	0.74307	-0.49764	0.49425
0.0572	0.72976	-0.67256	0.39348
0.18397	0.70762	-0.52365	0.445795
0.11784	0.68109	-0.56325	0.399465
0.28923	0.66341	-0.37418	0.47632
0.40262	0.6645	-0.26188	0.53356
0.66061	0.68985	-0.02924	0.67523
1.2353	0.832	0.4033	1.03365
2.27544	1.34594	0.9295	1.81069
4.33762	2.38891	1.94871	3.36327
7.03938	4.00947	3.02991	5.52443
9.72024	6.21904	3.5012	7.96964
12.0681	8.76863	3.29949	10.4184
13.9749	11.1518	2.82301	12.5634
15.6822	12.9844	2.69776	14.3333
17.2667	14.2236	3.04307	15.7451
18.39	15.041	3.34901	16.7155
18.768	15.5727	3.19532	17.1703
18.322	15.7633	2.55871	17.0426
17.2167	15.4118	1.8049	16.3143
15.5638	14.2937	1.27015	14.9288
13.3834	12.2849	1.09858	12.8341
10.9217	9.48288	1.4388	10.2023
9.157	6.24808	2.90892	7.70254
10.5934	4.46236	6.13103	7.52787
14.3617	7.4528	6.90889	10.9072
17.5732	11.931	5.6422	14.7521
19.0542	15.3115	3.74273	17.1828
18.8281	16.5739	2.25416	17.701
17.4907	15.6198	1.87087	16.5553
15.671	13.2643	2.40667	14.4677
13.8747	10.7647	3.10998	12.3197
12.2942	9.11529	3.17887	10.7047
11.0998	8.56836	2.5314	9.83406
10.3179	8.70663	1.61123	9.51225
9.75379	9.03675	0.71704	9.39527
9.41387	9.27982	0.13405	9.34685
9.26086	9.3849	-0.12404	9.32288
9.23288	9.46855	-0.23567	9.35072
9.34849	9.62568	-0.27719	9.48709
9.58926	9.80952	-0.22026	9.69939
9.88092	9.90535	-0.02443	9.89314
9.94991	9.82712	0.12279	9.88851
9.59579	9.54258	0.05321	9.56918
8.90382	9.07001	-0.16619	8.98691
7.94429	8.47212	-0.52783	8.2082
6.80963	7.80348	-0.99385	7.30656
5.69202	7.09465	-1.40263	6.39334
4.58348	6.47328	-1.8898	5.52838
3.67075	6.23095	-2.5602	4.95085
3.76753	6.64398	-2.87645	5.20575
5.40848	7.80872	-2.40024	6.6086
8.50326	9.78921	-1.28595	9.14624
12.7017	12.6051	0.09669	12.6534
16.3972	16.0354	0.36182	16.2163
18.4603	19.4539	-0.99364	18.9571
19.4764	21.6352	-2.15887	20.5558
19.813	21.4931	-1.68011	20.653
18.6144	19.391	-0.77653	19.0027
16.1575	16.4602	-0.30272	16.3088
13.446	13.0311	0.41496	13.2386
10.445	9.21306	1.23193	9.82903
7.29588	5.62041	1.67547	6.45815
4.62105	2.9014	1.71965	3.76123
2.46034	1.39005	1.07029	1.92519
1.07337	0.95451	0.11886	1.01394
1.13457	0.96962	0.16495	1.0521
1.55606	1.07274	0.48332	1.3144
1.60575	1.0974	0.50835	1.35157
1.32109	0.98428	0.33681	1.15268
0.99004	0.79039	0.19965	0.890215
0.83283	0.66119	0.17164	0.74701
0.78012	0.6741	0.10602	0.72711
0.73868	0.71886	0.01982	0.72877
0.40627	0.70829	-0.30202	0.55728
0.10805	0.6417	-0.53365	0.374875
0.28439	0.56415	-0.27976	0.42427
0.4136	0.5289	-0.1153	0.47125
0.45761	0.55079	-0.09318	0.5042
0.4148	0.59824	-0.18344	0.50652
0.41665	0.63061	-0.21396	0.52363
0.20037	0.63504	-0.43467	0.417705
0.2663	0.6267	-0.3604	0.4465
0.31042	0.62383	-0.31341	0.467125
0.23235	0.63241	-0.40006	0.43238
0.11503	0.64629	-0.53126	0.38066
0.28452	0.66312	-0.3786	0.47382
0.17967	0.69419	-0.51452	0.43693
0.2657	0.74887	-0.48317	0.507285
0.36774	0.81687	-0.44913	0.592305
0.32862	0.87428	-0.54566	0.60145
0.28689	0.90517	-0.61828	0.59603
0.2551	0.91025	-0.65515	0.582675
0.17852	0.89791	-0.71939	0.538215
0.14978	0.87491	-0.72513	0.512345
0.17147	0.84332	-0.67185	0.507395
0.1115	0.80312	-0.69162	0.45731
0.11035	0.75849	-0.64814	0.43442
0.1554	0.71955	-0.56415	0.437475
0.06543	0.69722	-0.63179	0.381325
0.12108	0.69796	-0.57688	0.40952
0.23038	0.72071	-0.49033	0.475545
0.34484	0.7553	-0.41046	0.55007
0.27684	0.78715	-0.51031	0.531995
0.08653	0.80575	-0.71922	0.44614
0.06222	0.80712	-0.7449	0.43467
0.19843	0.79172	-0.59329	0.495075
0.20854	0.7638	-0.55526	0.48617
0.10955	0.73148	-0.62193	0.420515
0.2455	0.70764	-0.46214	0.47657
0.31894	0.71053	-0.39159	0.514735
0.60704	0.75812	-0.15108	0.68258
1.16332	0.87593	0.28739	1.01963
1.98526	1.16777	0.81749	1.57652
3.22586	1.85013	1.37573	2.538
4.76644	3.03789	1.72855	3.90217
6.46175	4.61087	1.85088	5.53631
8.27853	6.28855	1.98998	7.28354
10.0379	7.81116	2.2267	8.92451
11.7194	9.12819	2.59123	10.4238
13.3534	10.3427	3.01071	11.8481
14.764	11.5152	3.24873	13.1396
15.8244	12.5986	3.22581	14.2115
16.4346	13.497	2.93753	14.9658
16.502	14.1235	2.37858	15.3128
15.9999	14.3446	1.65537	15.1722
14.9648	13.892	1.07281	14.4284
13.2735	12.4596	0.81398	12.8666
11.1302	9.95359	1.17664	10.5419
9.27812	6.73941	2.53871	8.00877
9.04058	4.23311	4.80747	6.63685
11.7686	5.33569	6.43289	8.55213
15.4964	8.76991	6.72651	12.1332
18.095	12.1915	5.90345	15.1432
19	14.3924	4.6076	16.6962
18.2663	14.9005	3.36586	16.5834
16.5188	13.939	2.57987	15.2289
14.5224	12.005	2.51745	13.2637
12.714	9.85671	2.85729	11.2854
11.3394	8.39511	2.94432	9.86727
10.4912	7.96895	2.52222	9.23006
10.0082	8.1179	1.89031	9.06306
9.64577	8.33539	1.31038	8.99058
9.36011	8.49674	0.86337	8.92843
9.20363	8.62388	0.57975	8.91376
9.12742	8.71277	0.41465	8.92009
9.16488	8.76464	0.40024	8.96476
9.30691	8.78757	0.51934	9.04724
9.40133	8.78453	0.6168	9.09293
9.35401	8.73312	0.62089	9.04357
9.10349	8.56687	0.53662	8.83518
8.55381	8.21322	0.34059	8.38351
7.68994	7.63834	0.0516	7.66414
6.40319	6.8568	-0.45361	6.63
4.62438	5.89899	-1.27461	5.26168
2.79347	4.93407	-2.1406	3.86377
2.83427	4.76213	-1.92786	3.7982
5.18188	6.44541	-1.26353	5.81364
8.66336	9.81258	-1.14922	9.23797
13.7514	14.4508	-0.69945	14.1011
19.1781	20.0244	-0.84633	19.6013
22.4861	25.372	-2.8859	23.929
22.8855	28.5618	-5.67631	25.7236
21.3334	28.2606	-6.92725	24.797
18.6933	24.5618	-5.86849	21.6276
15.0957	18.6481	-3.55235	16.8719
11.303	12.3828	-1.0798	11.8429
8.11148	7.54623	0.56525	7.82886
5.31756	4.51028	0.80728	4.91392
2.80318	2.50784	0.29534	2.65551
1.16173	1.14724	0.01449	1.15448
0.73595	0.70621	0.02974	0.72108
1.36692	0.98111	0.38581	1.17402
1.92448	1.12361	0.80087	1.52405
1.81009	1.03893	0.77116	1.42451
1.2229	0.85234	0.37056	1.03762
0.70466	0.75611	-0.05145	0.730385
0.42296	0.80701	-0.38405	0.614985
0.40822	0.86758	-0.45936	0.6379
0.51829	0.8588	-0.34051	0.688545
0.22471	0.78371	-0.559	0.50421
0.14049	0.67719	-0.5367	0.40884
0.31946	0.5958	-0.27634	0.45763
0.44537	0.58401	-0.13864	0.51469
0.31374	0.62967	-0.31593	0.471705
0.12938	0.68562	-0.55624	0.4075
0.12502	0.72141	-0.59639	0.423215
0.33717	0.74169	-0.40452	0.53943
0.42824	0.76325	-0.33501	0.595745
0.18182	0.78971	-0.60789	0.485765
0.40479	0.80995	-0.40516	0.60737
0.3414	0.81661	-0.47521	0.579005
0.27215	0.8202	-0.54805	0.546175
0.26773	0.83755	-0.56982	0.55264
0.29137	0.87106	-0.57969	0.581215
0.2339	0.90775	-0.67385	0.570825
0.30984	0.93512	-0.62528	0.62248
0.35115	0.94812	-0.59697	0.649635
0.40136	0.94433	-0.54297	0.672845
0.41024	0.9219	-0.51166	0.66607
0.30835	0.88254	-0.57419	0.595445
0.09489	0.83327	-0.73838	0.46408
0.12445	0.78517	-0.66072	0.45481
0.11888	0.74917	-0.63029	0.434025
0.08623	0.73136	-0.64513	0.408795
0.1052	0.73338	-0.62818	0.41929
0.21848	0.75344	-0.53496	0.48596
0.37086	0.78452	-0.41366	0.57769
0.42477	0.81632	-0.39155	0.620545
0.20996	0.84118	-0.63122	0.52557
0.06164	0.85506	-0.79342	0.45835
0.13901	0.85629	-0.71728	0.49765
0.03117	0.84744	-0.81627	0.439305
0.16441	0.83384	-0.66943	0.499125
0.16652	0.81725	-0.65073	0.491885
0.14419	0.79516	-0.65097	0.469675
0.08951	0.76967	-0.68016	0.42959
0.20165	0.75743	-0.55578	0.47954
0.29044	0.77571	-0.48527	0.533075
0.66381	0.82103	-0.15722	0.74242
1.7915	0.98698	0.80452	1.38924
3.89422	1.68575	2.20847	2.78998
6.36942	3.22701	3.14241	4.79821
8.57173	5.41669	3.15504	6.99421
10.4643	7.76156	2.7027	9.11291
12.1043	9.77599	2.32834	10.9402
13.6188	11.224	2.39486	12.4214
15.047	12.1874	2.85963	13.6172
16.2456	12.9178	3.32784	14.5817
16.9743	13.5772	3.39716	15.2757
17.0289	14.1101	2.91879	15.5695
16.4614	14.3092	2.15224	15.3853
15.3745	13.9746	1.39986	14.6746
13.7051	12.99	0.71509	13.3475
11.6897	11.203	0.48675	11.4464
9.80369	8.43697	1.36672	9.12033
8.91291	5.16723	3.74568	7.04007
10.7115	4.76565	5.94589	7.7386
14.1505	8.35356	5.79697	11.252
16.8114	11.8073	5.00408	14.3093
17.9709	13.797	4.17397	15.884
17.7014	14.1806	3.52077	15.941
16.3556	13.138	3.2176	14.7468
14.5267	11.2099	3.31679	12.8683
12.7275	9.25055	3.47698	10.989
11.261	7.93847	3.32254	9.59974
10.3311	7.50457	2.82651	8.91783
9.93178	7.71107	2.22071	8.82142
9.81952	8.13443	1.68509	8.97697
9.77202	8.51331	1.25871	9.14267
9.71182	8.78546	0.92636	9.24864
9.65069	8.97914	0.67155	9.31491
9.67853	9.08901	0.58952	9.38377
9.73494	9.06378	0.67116	9.39936
9.61391	8.87015	0.74376	9.24203
9.14337	8.51861	0.62476	8.83099
8.30382	8.06027	0.24355	8.18204
7.32292	7.54554	-0.22262	7.43423
6.37209	7.0078	-0.63571	6.68994
5.50357	6.52947	-1.0259	6.01652
4.69118	6.23295	-1.54177	5.46206
3.86637	6.16202	-2.29565	5.01419
3.62013	6.29496	-2.67483	4.95754
4.35147	6.77027	-2.4188	5.56087
5.99989	7.98035	-1.98046	6.99012
8.53909	10.231	-1.69195	9.38507
12.2819	13.4495	-1.1676	12.8657
16.4505	17.3687	-0.91822	16.9096
19.038	21.5407	-2.5027	20.2894
19.735	24.8724	-5.13742	22.3037
19.4968	25.7819	-6.28513	22.6393
18.2664	23.5368	-5.27046	20.9016
15.9713	19.13	-3.1587	17.5506
13.2423	14.3315	-1.08924	13.7869
10.7341	10.3101	0.42401	10.5221
8.13732	7.30298	0.83434	7.72015
5.30631	4.89084	0.41547	5.09858
3.04942	2.77709	0.27233	2.91325
1.62138	1.14324	0.47814	1.38231
0.85578	0.51961	0.33617	0.687695
1.14995	0.84499	0.30496	0.99747
1.33167	1.0022	0.32947	1.16694
1.27329	0.96611	0.30718	1.1197
1.07841	0.84738	0.23103	0.962895
0.98571	0.75731	0.2284	0.87151
0.70478	0.75294	-0.04816	0.72886
0.39336	0.79577	-0.40241	0.594565
0.40594	0.8293	-0.42336	0.61762
0.4747	0.81954	-0.34484	0.64712
0.29946	0.75905	-0.45959	0.529255
0.292	0.67643	-0.38443	0.484215
0.69116	0.61678	0.07438	0.65397
0.52305	0.59511	-0.07206	0.55908
0.38644	0.58427	-0.19783	0.485355
0.44355	0.56286	-0.11931	0.503205
0.25094	0.54499	-0.29405	0.397965
0.33404	0.5514	-0.21736	0.44272
0.41808	0.57948	-0.1614	0.49878
0.40746	0.61561	-0.20815	0.511535
0.21473	0.65622	-0.44149	0.435475
0.24977	0.71137	-0.4616	0.48057
0.3319	0.78874	-0.45684	0.56032
0.41181	0.87641	-0.4646	0.64411
0.43475	0.94891	-0.51416	0.69183
0.40331	0.99011	-0.5868	0.69671
0.4593	1.00113	-0.54183	0.730215
0.435	0.989	-0.554	0.712
0.27308	0.95817	-0.68509	0.615625
0.12897	0.91158	-0.78261	0.520275
0.07824	0.85489	-0.77665	0.466565
0.09681	0.79856	-0.70175	0.447685
0.13178	0.75432	-0.62254	0.44305
0.13473	0.72893	-0.5942	0.43183
0.10067	0.72407	-0.6234	0.41237
0.04999	0.73822	-0.68823	0.394105
0.11416	0.76405	-0.64989	0.439105
0.08598	0.78912	-0.70314	0.43755
0.10141	0.80302	-0.70161	0.452215
0.25138	0.80115	-0.54977	0.526265
0.40192	0.78507	-0.38315	0.593495
0.21258	0.76332	-0.55074	0.48795
0.09164	0.74624	-0.6546	0.41894
0.05622	0.73704	-0.68082	0.39663
0.10245	0.73103	-0.62858	0.41674
0.19694	0.72472	-0.52778	0.46083
0.40692	0.72567	-0.31875	0.566295
0.70446	0.75278	-0.04832	0.72862
1.26673	0.84001	0.42672	1.05337
2.14291	1.09649	1.04642	1.6197
3.53069	1.78344	1.74725	2.65706
5.68908	3.16795	2.52113	4.42851
8.30566	5.26736	3.0383	6.78651
10.9415	7.7996	3.14192	9.37056
13.2654	10.2906	2.97487	11.778
15.1622	12.3071	2.85509	13.7346
16.7375	13.7078	3.02974	15.2226
17.8362	14.5993	3.23683	16.2177
18.2486	15.0967	3.15191	16.6727
17.9628	15.2307	2.73204	16.5967
16.9867	14.9528	2.03384	15.9698
15.4344	14.165	1.26936	14.7997
13.4547	12.7725	0.68222	13.1136
11.2987	10.6187	0.67995	10.9587
9.33164	7.56744	1.7642	8.44954
9.28439	4.59462	4.68977	6.93951
12.2882	5.97163	6.31654	9.1299
15.5454	10.1175	5.42788	12.8315
17.2612	13.2537	4.00748	15.2574
17.3211	14.3658	2.95523	15.8434
16.2507	13.6752	2.57549	14.9629
14.6852	11.8612	2.824	13.2732
13.1417	9.75766	3.384	11.4497
11.89	8.23176	3.65826	10.0609
11.0167	7.76505	3.25169	9.3909
10.4378	8.13406	2.30376	9.28594
10.0573	8.73463	1.32267	9.39597
9.87186	9.17374	0.69812	9.5228
9.77688	9.38344	0.39344	9.58016
9.69584	9.44314	0.2527	9.56949
9.63176	9.46081	0.17095	9.54629
9.5626	9.47856	0.08404	9.52058
9.55435	9.46378	0.09057	9.50906
9.56757	9.38025	0.18732	9.47391
9.38462	9.21309	0.17153	9.29885
8.8172	8.95716	-0.13996	8.88718
8.02365	8.58838	-0.56473	8.30602
7.19249	8.06404	-0.87155	7.62827
6.23803	7.39079	-1.15276	6.81441
5.24174	6.66732	-1.42558	5.95453
4.16472	6.03558	-1.87086	5.10015
3.22644	5.61684	-2.3904	4.42164
3.51516	5.59775	-2.08259	4.55645
4.75673	6.33742	-1.58069	5.54707
6.67232	8.09949	-1.42717	7.3859
9.85305	10.8676	-1.0146	10.3604
14.0695	14.5772	-0.50772	14.3234
17.6749	18.9678	-1.29292	18.3213
19.4496	22.9886	-3.53897	21.2191
19.9417	24.9765	-5.0348	22.4591
19.2341	23.9593	-4.72525	21.5967
16.9148	20.436	-3.52118	18.6754
13.8401	15.7592	-1.91903	14.7996
10.8814	11.3033	-0.42185	11.0924
8.08541	7.86153	0.22388	7.97347
5.76619	5.21535	0.55084	5.49077
3.66141	2.95495	0.70646	3.30818
1.59934	1.21244	0.3869	1.40589
0.84652	0.58332	0.2632	0.71492
1.20585	0.94528	0.26057	1.07557
1.54653	1.10502	0.44151	1.32577
1.58001	1.04266	0.53735	1.31133
1.33509	0.88995	0.44514	1.11252
1.21896	0.7917	0.42726	1.00533
0.94233	0.81198	0.13035	0.877155
0.50482	0.87645	-0.37163	0.690635
0.35015	0.91159	-0.56144	0.63087
0.25466	0.89165	-0.63699	0.573155
0.36133	0.81965	-0.45832	0.59049
0.45189	0.72573	-0.27384	0.58881
0.2774	0.6525	-0.3751	0.46495
0.38626	0.61821	-0.23195	0.502235
0.60859	0.60178	0.00681	0.605185
0.57871	0.58418	-0.00547	0.581445
0.47142	0.57858	-0.10716	0.525
0.34982	0.5988	-0.24898	0.47431
0.38081	0.63618	-0.25537	0.508495
0.25539	0.67733	-0.42194	0.46636
0.24822	0.71905	-0.47083	0.483635
0.29255	0.76925	-0.4767	0.5309
0.15379	0.83318	-0.67939	0.493485
0.13241	0.90136	-0.76895	0.516885
0.19332	0.95611	-0.76279	0.574715
0.25641	0.98726	-0.73085	0.621835
0.24568	0.99572	-0.75004	0.6207
0.29109	0.98519	-0.6941	0.63814
0.3049	0.9588	-0.6539	0.63185
0.25853	0.92222	-0.66369	0.590375
0.15091	0.88396	-0.73305	0.517435
0.08784	0.85183	-0.76399	0.469835
0.16561	0.83017	-0.66456	0.49789
0.20075	0.81956	-0.61881	0.510155
0.16355	0.81886	-0.65531	0.491205
0.11503	0.8263	-0.71127	0.470665
0.17674	0.83774	-0.661	0.50724
0.31342	0.84643	-0.53301	0.579925
0.17428	0.84612	-0.67184	0.5102
0.10008	0.83406	-0.73398	0.46707
0.05764	0.81314	-0.7555	0.43539
0.17451	0.79341	-0.6189	0.48396
0.36753	0.78675	-0.41922	0.57714
0.44817	0.79712	-0.34895	0.622645
0.49632	0.81806	-0.32174	0.65719
0.66276	0.84788	-0.18512	0.75532
1.01575	0.92761	0.08814	0.97168
1.83506	1.17205	0.66301	1.50355
3.05019	1.69954	1.35065	2.37487
4.34243	2.53275	1.80968	3.43759
6.03841	3.69603	2.34238	4.86722
8.31181	5.30829	3.00352	6.81005
10.8782	7.40625	3.472	9.14225
13.3165	9.7664	3.55007	11.5414
15.4173	12.0057	3.41166	13.7115
17.2205	13.8151	3.40545	15.5178
18.5239	15.1161	3.40776	16.82
19.1213	15.9565	3.16486	17.5389
18.9705	16.3156	2.65488	17.643
18.049	16.0918	1.95718	17.0704
16.2884	15.1277	1.16066	15.7081
13.8321	13.2697	0.56234	13.5509
11.2262	10.5445	0.68171	10.8853
9.39389	7.2146	2.17929	8.30424
10.6799	4.65783	6.02212	7.66889
14.2767	6.73439	7.54233	10.5056
17.1504	11.073	6.07738	14.1117
18.177	14.4808	3.69624	16.3289
17.4652	15.7473	1.71789	16.6062
15.7269	14.7032	1.02365	15.2151
13.8569	12.2058	1.65112	13.0313
12.3064	9.61868	2.68774	10.9626
11.0842	8.04324	3.04093	9.56371
10.2542	7.71401	2.54023	8.98412
9.8453	8.06108	1.78422	8.95319
9.73405	8.56609	1.16796	9.15007
9.78087	9.02126	0.75961	9.40106
9.89881	9.36616	0.53265	9.63248
10.0144	9.58102	0.43339	9.79772
10.0104	9.66201	0.34839	9.8362
9.85675	9.63127	0.22548	9.74401
9.69787	9.50826	0.18961	9.60307
9.53388	9.2852	0.24868	9.40954
9.09579	8.94733	0.14846	9.02156
8.30143	8.50614	-0.20471	8.40378
7.32469	8.00649	-0.6818	7.66559
6.38269	7.48356	-1.10087	6.93313
5.63842	6.94178	-1.30336	6.2901
4.95653	6.41657	-1.46004	5.68655
4.11727	5.99513	-1.87786	5.0562
3.51724	5.75757	-2.24033	4.63741
3.56843	5.7942	-2.22577	4.68131
4.63773	6.34941	-1.71168	5.49357
6.50563	7.79892	-1.29329	7.15227
8.97019	10.2508	-1.28063	9.6105
12.1274	13.3569	-1.22946	12.7422
15.6909	16.5816	-0.89069	16.1362
18.7287	19.3674	-0.63872	19.048
20.136	20.9698	-0.83382	20.5529
19.7491	20.7605	-1.01135	20.2548
18.023	18.9764	-0.95337	18.4997
15.3342	16.2872	-0.95302	15.8107
12.2883	12.9267	-0.63837	12.6075
9.27753	9.25684	0.02069	9.26719
6.52647	6.06198	0.46449	6.29422
4.21475	3.71913	0.49562	3.96694
2.42337	2.05937	0.364	2.24137
1.17384	0.93715	0.23669	1.0555
1.04478	0.54871	0.49607	0.796745
1.43418	0.79589	0.63829	1.11503
1.85301	0.95538	0.89763	1.4042
1.74454	0.9254	0.81914	1.33497
1.19489	0.78758	0.40731	0.991235
0.94326	0.70077	0.24249	0.822015
0.82003	0.74344	0.07659	0.781735
0.44746	0.80829	-0.36083	0.627875
0.30156	0.80995	-0.50839	0.555755
0.32722	0.74236	-0.41514	0.53479
0.30312	0.64535	-0.34223	0.474235
0.34526	0.57137	-0.22611	0.458315
0.47783	0.54192	-0.06409	0.509875
0.49444	0.54187	-0.04743	0.518155
0.49324	0.549	-0.05576	0.52112
0.44449	0.55547	-0.11098	0.49998
0.42823	0.56664	-0.13841	0.497435
0.36291	0.58559	-0.22268	0.47425
0.25112	0.6097	-0.35858	0.43041
0.11872	0.63646	-0.51774	0.37759
0.14835	0.66879	-0.52044	0.40857
0.13291	0.71689	-0.58398	0.4249
0.279	0.78448	-0.50548	0.53174
0.27688	0.85488	-0.578	0.56588
0.22205	0.90067	-0.67862	0.56136
0.30903	0.90802	-0.59899	0.608525
0.35012	0.88641	-0.53629	0.618265
0.30467	0.85557	-0.5509	0.58012
0.22192	0.82901	-0.60709	0.525465
0.20101	0.80965	-0.60864	0.50533
0.21824	0.79512	-0.57688	0.50668
0.20055	0.78399	-0.58344	0.49227
0.18253	0.77794	-0.59541	0.480235
0.09773	0.78016	-0.68243	0.438945
0.0278	0.79276	-0.76496	0.41028
0.0813	0.81323	-0.73193	0.447265
0.07509	0.83214	-0.75705	0.453615
0.13667	0.83715	-0.70048	0.48691
0.16248	0.82199	-0.65951	0.492235
0.05556	0.79192	-0.73636	0.42374
0.17561	0.76018	-0.58457	0.467895
0.24197	0.73947	-0.4975	0.49072
0.10257	0.73562	-0.63305	0.419095
0.05392	0.74495	-0.69103	0.399435
0.12306	0.75641	-0.63335	0.439735
0.03481	0.76174	-0.72693	0.398275
0.08205	0.76725	-0.6852	0.42465
0.1075	0.78862	-0.68112	0.44806
0.19199	0.82844	-0.63645	0.510215
0.47511	0.86173	-0.38662	0.66842
1.13222	0.89345	0.23877	1.01283
2.53517	1.23622	1.29895	1.8857
4.70615	2.39166	2.31449	3.5489
7.20621	4.34127	2.86494	5.77374
9.7224	6.71503	3.00737	8.21871
12.1502	9.08461	3.0656	10.6174
14.5457	11.2682	3.27744	12.907
16.8217	13.2687	3.55302	15.0452
18.6268	15.015	3.61186	16.8209
19.6277	16.3281	3.29953	17.9779
19.7718	16.9996	2.77218	18.3857
19.0783	16.8486	2.22971	17.9635
17.6483	15.7494	1.89884	16.6989
15.6117	13.6826	1.92915	14.6472
13.2441	10.8407	2.40341	12.0424
10.8305	7.63449	3.19601	9.2325
9.66328	5.30363	4.35965	7.48346
12.283	6.54352	5.73946	9.41325
16.3835	9.89981	6.48374	13.1417
19.0572	12.967	6.09013	16.0121
19.6168	14.8459	4.77085	17.2314
18.5818	15.0224	3.55935	16.8021
16.8076	13.667	3.14058	15.2373
14.817	11.6303	3.18661	13.2237
12.8903	9.76461	3.12574	11.3275
11.3009	8.68038	2.62056	9.99066
10.0493	8.50637	1.54295	9.27784
9.12747	8.74915	0.37832	8.93831
8.57308	8.92455	-0.35147	8.74882
8.31322	8.96218	-0.64896	8.6377
8.32956	9.09558	-0.76602	8.71257
8.65703	9.47578	-0.81875	9.0664
9.24204	9.9742	-0.73216	9.60812
9.87679	10.3917	-0.51495	10.1343
10.4575	10.6419	-0.1844	10.5497
10.7823	10.7182	0.06402	10.7503
10.5346	10.5964	-0.06181	10.5655
9.94553	10.2303	-0.28482	10.0879
9.26232	9.61954	-0.35722	9.44093
8.33734	8.84027	-0.50293	8.58881
7.18572	8.00627	-0.82055	7.596
5.74481	7.1918	-1.44699	6.4683
4.30708	6.48941	-2.18233	5.39825
3.64889	6.23428	-2.58539	4.94158
4.50104	6.91468	-2.41364	5.70786
6.78006	8.70429	-1.92423	7.74217
10.3212	11.5039	-1.18274	10.9125
14.1176	15.0663	-0.94876	14.592
16.7701	18.6278	-1.85773	17.6989
18.7726	21.0661	-2.2935	19.9193
20.3988	21.678	-1.27912	21.0384
20.1658	20.3263	-0.16051	20.246
18.245	17.3512	0.8939	17.7981
15.0335	13.7774	1.25604	14.4055
11.4979	10.5126	0.98531	11.0053
8.29911	7.44424	0.85487	7.87167
5.33764	4.42941	0.90823	4.88353
2.8737	1.97098	0.90272	2.42234
1.15211	0.77431	0.3778	0.96321
0.81312	1.02227	-0.20915	0.917695
1.60511	1.23765	0.36746	1.42138
1.89538	1.2118	0.68358	1.55359
1.89231	1.01964	0.87267	1.45598
1.53154	0.78079	0.75075	1.15616
1.06175	0.67803	0.38372	0.86989
0.79042	0.73231	0.05811	0.761365
0.63896	0.79866	-0.1597	0.71881
0.40868	0.79842	-0.38974	0.60355
0.0614	0.74269	-0.68129	0.402045
0.30421	0.68639	-0.38218	0.4953
0.46282	0.66791	-0.20509	0.565365
0.43096	0.67769	-0.24673	0.554325
0.37405	0.6778	-0.30375	0.525925
0.31843	0.64883	-0.3304	0.48363
0.21486	0.61264	-0.39778	0.41375
0.31989	0.60446	-0.28457	0.462175
0.23275	0.63578	-0.40303	0.434265
0.26237	0.69169	-0.42932	0.47703
0.19506	0.75285	-0.55779	0.473955
0.36838	0.8098	-0.44142	0.58909
0.47761	0.85873	-0.38112	0.66817
0.2692	0.89734	-0.62814	0.58327
0.2969	0.92499	-0.62809	0.610945
0.34582	0.94197	-0.59615	0.643895
0.3784	0.94707	-0.56867	0.662735
0.33493	0.93843	-0.6035	0.63668
0.18262	0.91857	-0.73595	0.550595
0.11586	0.8943	-0.77844	0.50508
0.18096	0.87136	-0.6904	0.52616
0.2498	0.853	-0.6032	0.5514
0.24062	0.8407	-0.60008	0.54066
0.17513	0.83273	-0.6576	0.50393
0.08193	0.82429	-0.74236	0.45311
0.06881	0.81209	-0.74328	0.44045
0.26503	0.79854	-0.53351	0.531785
0.28823	0.78961	-0.50138	0.53892
0.12969	0.78843	-0.65874	0.45906
0.23659	0.79212	-0.55553	0.514355
0.11247	0.79227	-0.6798	0.45237
0.22191	0.77838	-0.55647	0.500145
0.19168	0.74851	-0.55683	0.470095
0.28848	0.7272	-0.43872	0.50784
0.24917	0.75551	-0.50634	0.50234
0.16896	0.82648	-0.65752	0.49772
0.9034	0.94181	-0.03841	0.922605
2.88632	1.46696	1.41936	2.17664
5.96017	2.899	3.06117	4.42958
9.39253	5.14366	4.24887	7.2681
12.6808	7.88028	4.80053	10.2805
15.6227	10.8458	4.77688	13.2342
17.9958	13.6609	4.33487	15.8283
19.3982	15.7778	3.62038	17.588
19.7497	16.8649	2.88478	18.3073
19.2152	16.9474	2.26783	18.0813
17.9322	16.1684	1.76377	17.0503
16.1035	14.6485	1.45498	15.376
13.9216	12.5014	1.4203	13.2115
11.5495	9.85719	1.6923	10.7033
9.05343	6.83147	2.22196	7.94245
8.2894	4.09799	4.19141	6.19369
10.8119	4.95577	5.85612	7.88383
13.757	8.56017	5.19681	11.1586
15.3062	11.638	3.66824	13.4721
15.2851	12.9982	2.28693	14.1417
14.189	12.4827	1.70622	13.3359
12.7045	10.8293	1.87521	11.7669
11.3582	9.07766	2.28057	10.2179
10.2441	7.90294	2.3412	9.07354
9.42614	7.55252	1.87362	8.48933
9.01959	7.9025	1.11709	8.46105
8.90157	8.54551	0.35606	8.72354
8.97047	9.12537	-0.1549	9.04792
9.14652	9.51304	-0.36652	9.32978
9.28434	9.74635	-0.46201	9.51534
9.25233	9.8908	-0.63847	9.57156
9.10131	9.97598	-0.87467	9.53864
8.99414	10.0084	-1.0143	9.50129
8.99567	9.99171	-0.99604	9.49369
9.03041	9.9325	-0.90209	9.48146
8.9288	9.83483	-0.90603	9.38181
8.68042	9.69752	-1.0171	9.18897
8.24791	9.51105	-1.26314	8.87948
7.72567	9.2605	-1.53483	8.49309
7.26355	8.94246	-1.67891	8.103
6.80347	8.54865	-1.74518	7.67606
6.22639	8.04589	-1.8195	7.13614
5.39892	7.42395	-2.02503	6.41143
4.35637	6.75113	-2.39476	5.55375
3.47598	6.17805	-2.70207	4.82701
3.19558	5.91503	-2.71945	4.5553
3.77632	6.26024	-2.48392	5.01828
5.36507	7.55822	-2.19315	6.46165
7.97726	9.82715	-1.84989	8.90221
10.8406	12.5169	-1.67637	11.6787
12.8598	14.8167	-1.9569	13.8383
14.2437	16.1353	-1.89157	15.1895
16.3513	16.3182	0.03306	16.3348
17.6581	15.8257	1.83238	16.7419
17.2159	15.4167	1.79925	16.3163
15.7218	14.6624	1.0594	15.1921
13.2737	12.4269	0.84682	12.8503
10.11	8.90149	1.20847	9.50572
7.02574	5.38215	1.64359	6.20395
4.3369	2.82284	1.51406	3.57987
2.26893	1.3708	0.89813	1.81987
0.88386	0.82335	0.06051	0.853605
0.82391	0.85418	-0.03027	0.839045
1.42672	1.01319	0.41353	1.21996
1.92093	1.06588	0.85505	1.49341
1.95136	0.99312	0.95824	1.47224
1.48941	0.89199	0.59742	1.1907
1.12662	0.86639	0.26023	0.996505
0.95329	0.88917	0.06412	0.92123
0.52608	0.86499	-0.33891	0.695535
0.33988	0.77338	-0.4335	0.55663
0.36115	0.65717	-0.29602	0.50916
0.42017	0.56311	-0.14294	0.49164
0.54874	0.50741	0.04133	0.528075
0.50206	0.48264	0.01942	0.49235
0.43436	0.48779	-0.05343	0.461075
0.42093	0.52075	-0.09982	0.47084
0.43952	0.56627	-0.12675	0.502895
0.49349	0.60979	-0.1163	0.55164
0.39747	0.6477	-0.25023	0.522585
0.16172	0.68665	-0.52493	0.424185
0.12797	0.73213	-0.60416	0.43005
0.25392	0.78465	-0.53073	0.519285
0.31657	0.84364	-0.52707	0.580105
0.36362	0.90313	-0.53951	0.633375
0.38279	0.94935	-0.56656	0.66607
0.38547	0.96705	-0.58158	0.67626
0.38744	0.95079	-0.56335	0.669115
0.33225	0.91069	-0.57844	0.62147
0.21514	0.86438	-0.64924	0.53976
0.10281	0.82466	-0.72185	0.463735
0.11751	0.79514	-0.67763	0.456325
0.05628	0.77322	-0.71694	0.41475
0.11796	0.75513	-0.63717	0.436545
0.15947	0.73894	-0.57947	0.449205
0.11439	0.72589	-0.6115	0.42014
0.27909	0.72107	-0.44198	0.50008
0.4361	0.72868	-0.29258	0.58239
0.27039	0.74507	-0.47468	0.50773
0.15477	0.7613	-0.60653	0.458035
0.1658	0.77324	-0.60744	0.46952
0.31805	0.78551	-0.46746	0.55178
0.44659	0.80405	-0.35746	0.62532
0.44648	0.82863	-0.38215	0.637555
0.55175	0.86211	-0.31036	0.70693
0.66379	0.9374	-0.27361	0.800595
1.02637	1.12718	-0.10081	1.07678
1.88826	1.49216	0.3961	1.69021
3.10646	2.03842	1.06804	2.57244
4.45586	2.78082	1.67504	3.61834
6.0978	3.79444	2.30336	4.94612
8.21374	5.14414	3.0696	6.67894
10.8214	6.88201	3.93941	8.85172
13.6301	9.08749	4.54258	11.3588
16.2588	11.6688	4.59008	13.9638
18.3249	14.2381	4.08685	16.2815
19.7647	16.3348	3.42992	18.0497
20.5711	17.6463	2.92482	19.1087
20.4134	18.0448	2.36857	19.2291
19.2708	17.4937	1.77718	18.3823
17.3349	15.9773	1.35767	16.6561
14.8634	13.5512	1.31222	14.2073
12.1934	10.2964	1.897	11.2449
10.2507	6.68583	3.56488	8.46827
11.7244	5.99542	5.72902	8.85993
15.5483	10.1393	5.40903	12.8438
18.5065	14.5868	3.91972	16.5467
19.413	16.9665	2.44649	18.1897
18.4996	16.7349	1.76467	17.6173
16.5643	14.6979	1.86641	15.6311
14.5044	12.1081	2.39623	13.3062
12.8768	9.8356	3.04125	11.3562
11.6937	8.43448	3.25924	10.0641
10.8336	8.12987	2.70373	9.48174
10.2092	8.49134	1.71782	9.35025
9.65865	8.92261	0.73604	9.29063
9.3029	9.1857	0.1172	9.2443
9.32544	9.35682	-0.03138	9.34113
9.56975	9.54443	0.02532	9.55709
9.78565	9.74062	0.04503	9.76314
9.85575	9.8884	-0.03265	9.87208
9.90279	9.95212	-0.04933	9.92746
9.96999	9.90819	0.0618	9.93909
9.94422	9.73244	0.21178	9.83833
9.6383	9.42498	0.21332	9.53164
8.94267	9.00164	-0.05897	8.97216
7.87147	8.46596	-0.59449	8.16872
6.51376	7.83293	-1.31917	7.17335
5.06054	7.12945	-2.06891	6.09499
3.84247	6.42249	-2.58002	5.13248
3.7135	5.98322	-2.26972	4.84836
4.87364	6.27215	-1.39851	5.57289
6.89069	7.53483	-0.64414	7.21276
9.53332	9.77423	-0.24091	9.65377
13.1057	13.0736	0.03207	13.0896
16.8032	17.3189	-0.51568	17.0611
18.9864	21.731	-2.74463	20.3587
19.9812	24.8771	-4.89592	22.4291
20.4832	25.2881	-4.80487	22.8856
19.2998	22.5862	-3.28639	20.943
16.7848	18.0213	-1.23649	17.403
13.7239	13.2512	0.4727	13.4876
10.5218	9.10204	1.41978	9.81193
7.57688	5.90455	1.67233	6.74071
5.12622	3.69875	1.42747	4.41249
3.057	2.27981	0.77719	2.6684
1.46834	1.44114	0.0272	1.45474
0.90011	0.96807	-0.06796	0.93409
1.48659	0.85886	0.62773	1.17273
1.8463	1.01111	0.83519	1.4287
1.75187	1.10008	0.65179	1.42597
1.33876	1.04156	0.2972	1.19016
0.93741	0.92454	0.01287	0.930975
0.67616	0.88479	-0.20863	0.780475
0.60835	0.93085	-0.3225	0.7696
0.55271	0.95304	-0.40033	0.752875
0.33379	0.89278	-0.55899	0.613285
0.23945	0.76034	-0.52089	0.499895
0.19458	0.60801	-0.41343	0.401295
0.25021	0.50085	-0.25064	0.37553
0.45889	0.46514	-0.00625	0.462015
0.60364	0.47726	0.12638	0.54045
0.59789	0.51171	0.08618	0.5548
0.60042	0.5549	0.04552	0.57766
0.5368	0.59159	-0.05479	0.564195
0.46364	0.61627	-0.15263	0.539955
0.51497	0.64016	-0.12519	0.577565
0.48749	0.67023	-0.18274	0.57886
0.16914	0.70402	-0.53488	0.43658
0.27925	0.74326	-0.46401	0.511255
0.22813	0.7902	-0.56207	0.509165
0.37588	0.83493	-0.45905	0.605405
0.43105	0.85974	-0.42869	0.645395
0.41875	0.85869	-0.43994	0.63872
0.34873	0.84185	-0.49312	0.59529
0.2463	0.82182	-0.57552	0.53406
0.2297	0.80611	-0.57641	0.517905
0.27822	0.79723	-0.51901	0.537725
0.26441	0.79291	-0.5285	0.52866
0.11061	0.78828	-0.67767	0.449445
0.11883	0.78061	-0.66178	0.44972
0.12969	0.77211	-0.64242	0.4509
0.12395	0.76692	-0.64297	0.445435
0.15612	0.76558	-0.60946	0.46085
0.13252	0.76363	-0.63111	0.448075
0.14997	0.7568	-0.60683	0.453385
0.26051	0.74734	-0.48683	0.503925
0.36121	0.74196	-0.38075	0.551585
0.20272	0.74267	-0.53995	0.472695
0.32564	0.74256	-0.41692	0.5341
0.41241	0.73535	-0.32294	0.57388
0.24808	0.72918	-0.4811	0.48863
0.20971	0.73754	-0.52783	0.473625
0.27907	0.753	-0.47393	0.516035
0.605	0.77734	-0.17234	0.69117
1.51053	0.99508	0.51545	1.2528
3.35682	1.77935	1.57747	2.56808
6.17693	3.32347	2.85346	4.7502
9.41228	5.63586	3.77642	7.52407
12.4629	8.38529	4.07766	10.4241
14.965	11.0034	3.96158	12.9842
16.8649	13.1363	3.72853	15.0006
18.1984	14.7052	3.49315	16.4518
18.8616	15.6765	3.18504	17.269
18.7694	16.035	2.73435	17.4022
17.9178	15.7799	2.13788	16.8488
16.4484	14.8558	1.59254	15.6521
14.5757	13.2006	1.37506	13.8882
12.5037	10.8652	1.63848	11.6845
10.424	8.08078	2.34324	9.2524
8.82524	5.27164	3.5536	7.04844
9.60081	4.10466	5.49615	6.85273
12.6043	6.63769	5.9666	9.62099
15.2797	10.1791	5.10061	12.7294
16.4789	12.8179	3.66099	14.6484
16.1512	13.8097	2.34151	14.9805
14.8233	13.1247	1.69857	13.974
13.1983	11.4236	1.77469	12.311
11.6962	9.63239	2.06384	10.6643
10.3725	8.40513	1.96739	9.38883
9.29541	7.97611	1.3193	8.63576
8.6758	8.16518	0.51062	8.42049
8.51149	8.58615	-0.07466	8.54882
8.61974	8.98222	-0.36248	8.80098
8.87131	9.30259	-0.43128	9.08695
9.1566	9.59651	-0.43991	9.37655
9.3213	9.88064	-0.55934	9.60097
9.48474	10.1141	-0.62938	9.79943
9.74176	10.2566	-0.51487	9.9992
9.95201	10.299	-0.34704	10.1255
10.0551	10.253	-0.19791	10.1541
9.90767	10.1336	-0.22595	10.0206
9.54895	9.95638	-0.40743	9.75267
9.11803	9.7234	-0.60537	9.42071
8.58274	9.41184	-0.8291	8.99729
7.92086	8.99276	-1.0719	8.45681
7.02557	8.429	-1.40343	7.72729
5.89924	7.6803	-1.78106	6.78977
4.71307	6.79254	-2.07947	5.75281
3.68535	5.98178	-2.29643	4.83357
3.27351	5.66317	-2.38966	4.46834
4.75955	6.44733	-1.68778	5.60344
8.34147	8.90055	-0.55908	8.62101
12.6959	13.0498	-0.35394	12.8728
16.1179	18.0849	-1.96703	17.1014
18.801	22.3742	-3.57318	20.5876
21.0827	24.138	-3.05533	22.6104
21.1803	22.7647	-1.58437	21.9725
19.2526	19.2571	-0.00446	19.2548
16.1972	14.9117	1.28549	15.5545
12.6677	10.4843	2.18344	11.576
9.14207	6.6607	2.48137	7.90139
5.94187	3.87167	2.0702	4.90677
3.33185	2.15258	1.17927	2.74221
1.4361	1.3711	0.065	1.4036
0.89641	1.05792	-0.16151	0.977165
1.22753	0.94839	0.27914	1.08796
1.64192	1.00405	0.63787	1.32299
1.75537	1.02216	0.73321	1.38877
1.47712	0.93126	0.54586	1.20419
1.14596	0.82535	0.32061	0.985655
0.89632	0.82748	0.06884	0.8619
0.68958	0.90173	-0.21215	0.795655
0.56083	0.92915	-0.36832	0.74499
0.50473	0.86805	-0.36332	0.68639
0.29571	0.73937	-0.44366	0.51754
0.38734	0.59618	-0.20884	0.49176
0.65971	0.49719	0.16252	0.57845
0.62166	0.4665	0.15516	0.54408
0.57526	0.48751	0.08775	0.531385
0.52208	0.53418	-0.0121	0.52813
0.46563	0.58556	-0.11993	0.525595
0.47018	0.6249	-0.15472	0.54754
0.35401	0.65095	-0.29694	0.50248
0.18787	0.67732	-0.48945	0.432595
0.05383	0.70914	-0.65531	0.381485
0.12186	0.74315	-0.62129	0.432505
0.04071	0.78367	-0.74296	0.41219
0.19532	0.83518	-0.63986	0.51525
0.23518	0.88704	-0.65186	0.56111
0.31466	0.91952	-0.60486	0.61709
0.40467	0.92557	-0.5209	0.66512
0.40409	0.91459	-0.5105	0.65934
0.35244	0.89709	-0.54465	0.624765
0.2278	0.8765	-0.6487	0.55215
0.11153	0.85229	-0.74076	0.48191
0.15211	0.82509	-0.67298	0.4886
0.23373	0.79752	-0.56379	0.515625
0.17698	0.77264	-0.59566	0.47481
0.09836	0.75465	-0.65629	0.426505
0.17208	0.74805	-0.57597	0.460065
0.19891	0.75305	-0.55414	0.47598
0.31886	0.76408	-0.44522	0.54147
0.33635	0.77471	-0.43836	0.55553
[truncated: 100,009 more rows]
[truncated: 4 more columns]
